# Supplementary material
Source: publisher figshare collection journal article supplement (https://acs.figshare.com/ndownloader/files/8028944)
Supplement: Supplementary file 1 [file 8028944]

 
data_shelx
 
_audit_creation_method            SHELXL-2013
_chemical_name_systematic
;
 ?
;
_chemical_name_common             ?
_chemical_melting_point           ?
_chemical_formula_moiety          ?
_chemical_formula_sum
 'C13.50 H17.50 Cl4 Co1.50 Mn0.50 N2.50 O8' 
_chemical_formula_weight          600.46

loop_
 _atom_type_symbol
 _atom_type_description
 _atom_type_scat_dispersion_real
 _atom_type_scat_dispersion_imag
 _atom_type_scat_source
 'C'  'C'   0.0033   0.0016
 'International Tables Vol C Tables 4.2.6.8 and 6.1.1.4'
 'H'  'H'   0.0000   0.0000
 'International Tables Vol C Tables 4.2.6.8 and 6.1.1.4'
 'N'  'N'   0.0061   0.0033
 'International Tables Vol C Tables 4.2.6.8 and 6.1.1.4'
 'O'  'O'   0.0106   0.0060
 'International Tables Vol C Tables 4.2.6.8 and 6.1.1.4'
 'Mn'  'Mn'   0.3368   0.7283
 'International Tables Vol C Tables 4.2.6.8 and 6.1.1.4'
 'Co'  'Co'   0.3494   0.9721
 'International Tables Vol C Tables 4.2.6.8 and 6.1.1.4'
 'Cl'  'Cl'   0.1484   0.1585
 'International Tables Vol C Tables 4.2.6.8 and 6.1.1.4'
 
_space_group_crystal_system       orthorhombic
_space_group_IT_number            62
_space_group_name_H-M_alt         'P n m a'
_space_group_name_Hall            '-P 2ac 2n'
 
_shelx_space_group_comment
;
The symmetry employed for this shelxl refinement is uniquely defined
by the following loop, which should always be used as a source of
symmetry information in preference to the above space-group names.
They are only intended as comments.
;
 
loop_
 _space_group_symop_operation_xyz
 'x, y, z'
 '-x+1/2, -y, z+1/2'
 'x+1/2, -y+1/2, -z+1/2'
 '-x, y+1/2, -z'
 '-x, -y, -z'
 'x-1/2, y, -z-1/2'
 '-x-1/2, y-1/2, z-1/2'
 'x, -y-1/2, z'
 
_cell_length_a                    17.957(5)
_cell_length_b                    11.196(5)
_cell_length_c                    21.836(5)
_cell_angle_alpha                 90.000(5)
_cell_angle_beta                  90.000(5)
_cell_angle_gamma                 90.000(5)
_cell_volume                      4390(3)
_cell_formula_units_Z             8
_cell_measurement_temperature     200(2)
_cell_measurement_reflns_used     ? 
_cell_measurement_theta_min       ? 
_cell_measurement_theta_max       ? 
 
_exptl_crystal_description        black 
_exptl_crystal_colour             block 
_exptl_crystal_density_meas       ? 
_exptl_crystal_density_method     ?              
_exptl_crystal_density_diffrn     1.817          
_exptl_crystal_F_000              2408
_exptl_transmission_factor_min    ?                                             
_exptl_transmission_factor_max    ?                                             
_exptl_crystal_size_max           0.100
_exptl_crystal_size_mid           0.050
_exptl_crystal_size_min           0.050
_exptl_absorpt_coefficient_mu     1.952
_shelx_estimated_absorpt_T_min    0.829
_shelx_estimated_absorpt_T_max    0.909
_exptl_absorpt_correction_type    multi-scan 
_exptl_absorpt_correction_T_min   0.6693 
_exptl_absorpt_correction_T_max   0.7454 
_exptl_absorpt_process_details    SADABS 
 
_exptl_special_details
;
 ?
;
 
_diffrn_ambient_temperature       200(2)
_diffrn_radiation_wavelength      0.71073
_diffrn_radiation_type            MoK\a
_diffrn_source                    "fine-focused sealed source"                       
_diffrn_measurement_device_type   'Bruker APEX-II CCD' 
_diffrn_measurement_method        '\f and \w scans' 
_diffrn_detector_area_resol_mean  8.366 
_diffrn_reflns_number             68053
_diffrn_reflns_av_unetI/netI      0.0175
_diffrn_reflns_av_R_equivalents   0.0386
_diffrn_reflns_limit_h_min        -22
_diffrn_reflns_limit_h_max        22
_diffrn_reflns_limit_k_min        -14
_diffrn_reflns_limit_k_max        13
_diffrn_reflns_limit_l_min        -27
_diffrn_reflns_limit_l_max        27
_diffrn_reflns_theta_min          1.468
_diffrn_reflns_theta_max          26.421
_diffrn_reflns_theta_full         25.000
_diffrn_measured_fraction_theta_max   1.000
_diffrn_measured_fraction_theta_full  1.000
_diffrn_reflns_Laue_measured_fraction_max    1.000
_diffrn_reflns_Laue_measured_fraction_full   1.000
_diffrn_reflns_point_group_measured_fraction_max   1.000
_diffrn_reflns_point_group_measured_fraction_full  1.000
_reflns_number_total              4748
_reflns_number_gt                 4009
_reflns_threshold_expression      'I > 2\s(I)'
_reflns_Friedel_coverage          0.000
_reflns_Friedel_fraction_max      .
_reflns_Friedel_fraction_full     .
 
_reflns_special_details
;
 Reflections were merged by SHELXL according to the crystal
 class for the calculation of statistics and refinement.
 
 _reflns_Friedel_fraction is defined as the number of unique
 Friedel pairs measured divided by the number that would be
 possible theoretically, ignoring centric projections and
 systematic absences.
;
 
_computing_data_collection        'Bruker APEX2'
_computing_cell_refinement        'Bruker SAINT'
_computing_data_reduction         'Bruker SAINT'
_computing_structure_solution     'SIR-92'
_computing_structure_refinement   'SHELXL-2013 (Sheldrick, 2013)'
_computing_molecular_graphics     'Bruker SHELXTL'
_computing_publication_material   'Bruker SHELXTL'
 
_refine_special_details
;
 ?
;
_refine_ls_structure_factor_coef  Fsqd
_refine_ls_matrix_type            full
_refine_ls_weighting_scheme       calc
_refine_ls_weighting_details
'w=1/[\s^2^(Fo^2^)+(0.0996P)^2^+15.3433P] where P=(Fo^2^+2Fc^2^)/3'
_atom_sites_solution_primary      ?
_atom_sites_solution_secondary    ?
_atom_sites_solution_hydrogens    geom
_refine_ls_hydrogen_treatment     constr
_refine_ls_extinction_method      none
_refine_ls_extinction_coef        .
_refine_ls_number_reflns          4748
_refine_ls_number_parameters      297
_refine_ls_number_restraints      0
_refine_ls_R_factor_all           0.0623
_refine_ls_R_factor_gt            0.0515
_refine_ls_wR_factor_ref          0.1721
_refine_ls_wR_factor_gt           0.1579
_refine_ls_goodness_of_fit_ref    1.047
_refine_ls_restrained_S_all       1.047
_refine_ls_shift/su_max           0.001
_refine_ls_shift/su_mean          0.000
 
loop_
 _atom_site_label
 _atom_site_type_symbol
 _atom_site_fract_x
 _atom_site_fract_y
 _atom_site_fract_z
 _atom_site_U_iso_or_equiv
 _atom_site_adp_type
 _atom_site_occupancy
 _atom_site_site_symmetry_order  
 _atom_site_calc_flag
 _atom_site_refinement_flags_posn
 _atom_site_refinement_flags_adp
 _atom_site_refinement_flags_occupancy
 _atom_site_disorder_assembly
 _atom_site_disorder_group
C1 C 0.4561(3) 0.1473(4) 0.4875(2) 0.0361(10) Uani 1 1 d . . . . .
H1 H 0.4472 0.0756 0.5077 0.043 Uiso 1 1 calc R U . . .
C2 C 0.4803(3) 0.1442(5) 0.4277(2) 0.0444(12) Uani 1 1 d . . . . .
H2 H 0.4886 0.0717 0.4081 0.053 Uiso 1 1 calc R U . . .
C3 C 0.4922(4) 0.2500 0.3975(3) 0.0454(17) Uani 1 2 d S T P . .
H3 H 0.5082 0.2500 0.3570 0.054 Uiso 1 2 calc R U P . .
C4 C 0.4451(3) 0.0921(6) 0.8352(2) 0.0479(13) Uani 1 1 d . . . . .
H4 H 0.4964 0.0965 0.8299 0.057 Uiso 1 1 calc R U . . .
C5 C 0.4172(3) 0.0750(7) 0.8929(2) 0.0591(17) Uani 1 1 d . . . . .
H5 H 0.4494 0.0664 0.9260 0.071 Uiso 1 1 calc R U . . .
C6 C 0.3410(3) 0.0707(6) 0.9016(2) 0.0504(13) Uani 1 1 d . . . . .
H6 H 0.3212 0.0598 0.9406 0.060 Uiso 1 1 calc R U . . .
C7 C 0.2953(3) 0.0829(5) 0.8519(2) 0.0453(12) Uani 1 1 d . . . . .
H7 H 0.2438 0.0815 0.8564 0.054 Uiso 1 1 calc R U . . .
C8 C 0.3270(3) 0.0973(5) 0.7950(2) 0.0381(10) Uani 1 1 d . . . . .
H8 H 0.2958 0.1037 0.7611 0.046 Uiso 1 1 calc R U . . .
C9 C 0.5866(2) 0.0220(4) 0.7115(2) 0.0315(9) Uani 1 1 d . . . . .
C10 C 0.6389(3) -0.0802(5) 0.7246(3) 0.0516(14) Uani 1 1 d . . . . .
H10A H 0.6422 -0.1308 0.6892 0.077 Uiso 1 1 calc R U . . .
H10B H 0.6205 -0.1255 0.7587 0.077 Uiso 1 1 calc R U . . .
H10C H 0.6874 -0.0493 0.7342 0.077 Uiso 1 1 calc R U . . .
C11 C 0.3417(2) 0.0271(4) 0.6199(2) 0.0300(9) Uani 1 1 d . . . . .
C12 C 0.2964(3) -0.0755(4) 0.5961(3) 0.0471(12) Uani 1 1 d . . . . .
H12A H 0.2602 -0.0464 0.5675 0.071 Uiso 1 1 calc R U . . .
H12B H 0.2715 -0.1140 0.6296 0.071 Uiso 1 1 calc R U . . .
H12C H 0.3286 -0.1317 0.5761 0.071 Uiso 1 1 calc R U . . .
C13 C 0.2236(8) 0.2500 0.4921(6) 0.108(5) Uani 1 2 d S T P . .
H13A H 0.2373 0.3200 0.5158 0.129 Uiso 0.5 1 calc R U P . .
H13B H 0.2373 0.1800 0.5158 0.129 Uiso 0.5 1 calc R U P . .
C14 C 0.4022(5) 0.7500 0.7525(4) 0.060(2) Uani 1 2 d S T P . .
H14A H 0.4158 0.6802 0.7286 0.072 Uiso 0.5 1 calc R U P . .
H14B H 0.4158 0.8198 0.7286 0.072 Uiso 0.5 1 calc R U P . .
C15 C 0.8738(8) 0.2500 0.4464(13) 0.186(12) Uani 1 2 d S T P . .
H15A H 0.8312 0.2500 0.4192 0.223 Uiso 1 2 calc R U P . .
H15B H 0.8544 0.2500 0.4879 0.223 Uiso 1 2 calc R U P . .
C16 C 0.1906(4) 0.2500 0.6811(4) 0.0506(18) Uani 1 2 d S T P . .
H16A H 0.1789 0.2500 0.7245 0.061 Uiso 1 2 calc R U P . .
H16B H 0.2444 0.2500 0.6770 0.061 Uiso 1 2 calc R U P . .
N1 N 0.4448(3) 0.2500 0.5175(2) 0.0270(10) Uani 1 2 d S T P . .
N2 N 0.40062(19) 0.1026(3) 0.78614(16) 0.0260(7) Uani 1 1 d . . . . .
N3 N 0.6517(6) 0.2030(7) 0.5564(4) 0.112(3) Uani 1 1 d . . . . .
O1 O 0.48602(14) 0.1420(2) 0.62731(12) 0.0227(6) Uani 1 1 d . . . . .
O2 O 0.5057(2) 0.2500 0.73021(17) 0.0214(7) Uani 1 2 d S T P . .
O3 O 0.3804(2) 0.2500 0.68447(17) 0.0211(7) Uani 1 2 d S T P . .
O4 O 0.34366(16) 0.1211(2) 0.58744(13) 0.0268(6) Uani 1 1 d . . . . .
O5 O 0.37610(16) 0.0089(2) 0.67003(13) 0.0294(6) Uani 1 1 d . . . . .
O6 O 0.61575(16) 0.1158(3) 0.68971(14) 0.0317(7) Uani 1 1 d . . . . .
O7 O 0.51834(16) 0.0036(3) 0.72198(13) 0.0297(6) Uani 1 1 d . . . . .
O8 O 0.6186(5) 0.2500 0.5861(4) 0.107(4) Uani 1 2 d S T P . .
O9 O 0.6351(5) 0.0939(7) 0.5535(4) 0.138(3) Uani 1 1 d . . . . .
O10 O 0.7131(3) 0.2500 0.5264(3) 0.0644(17) Uani 1 2 d S T P . .
Mn1 Mn 0.55560(4) 0.2500 0.65627(4) 0.0233(2) Uani 1 2 d S T P . .
Co1 Co 0.41186(4) 0.2500 0.60304(3) 0.0214(2) Uani 1 2 d S T P . .
Co2 Co 0.44312(3) 0.12359(5) 0.70539(2) 0.02177(18) Uani 1 1 d . . . . .
Cl1 Cl 0.2713(3) 0.2500 0.4272(2) 0.173(3) Uani 1 2 d S T P . .
Cl2 Cl 0.1276(2) 0.2500 0.4812(2) 0.1420(18) Uani 1 2 d S T P . .
Cl3 Cl 0.4543(3) 0.7500 0.81846(18) 0.1172(13) Uani 1 2 d S T P . .
Cl4 Cl 0.30519(15) 0.7500 0.76207(18) 0.0934(10) Uani 1 2 d S T P . .
Cl5 Cl 0.91797(14) 0.1191(2) 0.43635(11) 0.0925(6) Uani 1 1 d . . . . .
Cl6 Cl 0.15470(10) 0.12029(15) 0.64762(9) 0.0689(5) Uani 1 1 d . . . . .
 
loop_
 _atom_site_aniso_label
 _atom_site_aniso_U_11
 _atom_site_aniso_U_22
 _atom_site_aniso_U_33
 _atom_site_aniso_U_23
 _atom_site_aniso_U_13
 _atom_site_aniso_U_12
C1 0.050(3) 0.026(2) 0.033(2) 0.0010(18) 0.0017(19) 0.0070(19)
C2 0.061(3) 0.039(3) 0.033(2) -0.007(2) 0.006(2) 0.014(2)
C3 0.053(4) 0.056(5) 0.028(3) 0.000 0.007(3) 0.000
C4 0.027(2) 0.083(4) 0.033(2) 0.003(3) -0.0023(18) 0.005(2)
C5 0.046(3) 0.101(5) 0.030(2) 0.008(3) -0.006(2) 0.007(3)
C6 0.053(3) 0.065(4) 0.034(2) 0.005(2) 0.013(2) 0.001(3)
C7 0.030(2) 0.062(3) 0.044(3) 0.003(2) 0.010(2) -0.009(2)
C8 0.032(2) 0.047(3) 0.036(2) 0.005(2) -0.0020(18) -0.004(2)
C9 0.031(2) 0.027(2) 0.036(2) -0.0028(17) -0.0054(17) 0.0058(17)
C10 0.040(3) 0.033(3) 0.082(4) 0.004(3) -0.003(3) 0.011(2)
C11 0.029(2) 0.025(2) 0.036(2) -0.0037(17) 0.0003(17) -0.0028(16)
C12 0.055(3) 0.031(3) 0.055(3) -0.001(2) -0.016(2) -0.015(2)
C13 0.118(11) 0.125(11) 0.080(8) 0.000 -0.048(8) 0.000
C14 0.072(6) 0.043(4) 0.064(5) 0.000 0.028(4) 0.000
C15 0.078(10) 0.077(9) 0.40(4) 0.000 0.071(16) 0.000
C16 0.044(4) 0.053(5) 0.055(5) 0.000 0.005(3) 0.000
N1 0.032(3) 0.024(2) 0.025(2) 0.000 0.0002(19) 0.000
N2 0.0236(16) 0.0271(17) 0.0273(16) 0.0026(14) 0.0012(13) -0.0022(13)
N3 0.164(9) 0.062(4) 0.111(6) 0.020(4) -0.054(6) -0.049(5)
O1 0.0243(13) 0.0193(13) 0.0245(13) -0.0005(10) 0.0025(10) 0.0009(10)
O2 0.0183(17) 0.0224(18) 0.0236(18) 0.000 0.0001(14) 0.000
O3 0.0209(18) 0.0186(17) 0.0238(18) 0.000 0.0014(15) 0.000
O4 0.0282(14) 0.0241(14) 0.0280(14) -0.0006(11) -0.0048(11) -0.0013(11)
O5 0.0318(15) 0.0221(14) 0.0342(15) 0.0028(12) -0.0023(12) -0.0045(11)
O6 0.0268(15) 0.0276(15) 0.0408(17) -0.0004(13) -0.0002(13) 0.0054(12)
O7 0.0315(15) 0.0226(14) 0.0349(15) 0.0035(12) -0.0016(12) 0.0048(12)
O8 0.055(4) 0.201(13) 0.064(5) 0.000 0.044(4) 0.000
O9 0.159(8) 0.102(5) 0.153(7) -0.018(5) 0.036(6) -0.011(5)
O10 0.039(3) 0.104(5) 0.051(3) 0.000 0.025(3) 0.000
Mn1 0.0201(4) 0.0213(4) 0.0285(4) 0.000 0.0033(3) 0.000
Co1 0.0235(4) 0.0178(4) 0.0229(4) 0.000 0.0000(3) 0.000
Co2 0.0214(3) 0.0191(3) 0.0248(3) 0.00221(19) -0.00007(19) -0.00074(18)
Cl1 0.104(3) 0.324(9) 0.090(3) 0.000 -0.007(2) 0.000
Cl2 0.101(3) 0.223(5) 0.102(3) 0.000 -0.034(2) 0.000
Cl3 0.149(3) 0.114(3) 0.088(2) 0.000 -0.032(2) 0.000
Cl4 0.0619(15) 0.0754(17) 0.143(3) 0.000 0.0438(17) 0.000
Cl5 0.0949(15) 0.0862(14) 0.0963(15) -0.0141(12) 0.0117(12) 0.0080(11)
Cl6 0.0626(9) 0.0643(10) 0.0797(11) -0.0135(8) 0.0198(8) -0.0145(7)
 
_geom_special_details
;
 All esds (except the esd in the dihedral angle between two l.s. planes)
 are estimated using the full covariance matrix.  The cell esds are taken
 into account individually in the estimation of esds in distances, angles
 and torsion angles; correlations between esds in cell parameters are only
 used when they are defined by crystal symmetry.  An approximate (isotropic)
 treatment of cell esds is used for estimating esds involving l.s. planes.
;
 
loop_
 _geom_bond_atom_site_label_1
 _geom_bond_atom_site_label_2
 _geom_bond_distance
 _geom_bond_site_symmetry_2
 _geom_bond_publ_flag
C1 N1 1.340(5) . ?
C1 C2 1.376(7) . ?
C1 H1 0.9300 . ?
C2 C3 1.372(6) . ?
C2 H2 0.9300 . ?
C3 C2 1.372(6) 8_565 ?
C3 H3 0.9300 . ?
C4 N2 1.341(6) . ?
C4 C5 1.369(7) . ?
C4 H4 0.9300 . ?
C5 C6 1.383(8) . ?
C5 H5 0.9300 . ?
C6 C7 1.369(8) . ?
C6 H6 0.9300 . ?
C7 C8 1.375(7) . ?
C7 H7 0.9300 . ?
C8 N2 1.338(6) . ?
C8 H8 0.9300 . ?
C9 O7 1.264(5) . ?
C9 O6 1.266(5) . ?
C9 C10 1.507(6) . ?
C10 H10A 0.9600 . ?
C10 H10B 0.9600 . ?
C10 H10C 0.9600 . ?
C11 O4 1.269(5) . ?
C11 O5 1.273(5) . ?
C11 C12 1.500(6) . ?
C12 H12A 0.9600 . ?
C12 H12B 0.9600 . ?
C12 H12C 0.9600 . ?
C13 Cl1 1.657(15) . ?
C13 Cl2 1.740(14) . ?
C13 H13A 0.9700 . ?
C13 H13B 0.9700 . ?
C14 Cl3 1.719(11) . ?
C14 Cl4 1.755(9) . ?
C14 H14A 0.9700 . ?
C14 H14B 0.9700 . ?
C15 Cl5 1.680(7) 8_565 ?
C15 Cl5 1.680(7) . ?
C15 H15A 0.9700 . ?
C15 H15B 0.9700 . ?
C16 Cl6 1.749(5) 8_565 ?
C16 Cl6 1.749(5) . ?
C16 H16A 0.9700 . ?
C16 H16B 0.9700 . ?
N1 C1 1.340(5) 8_565 ?
N1 Co1 1.959(5) . ?
N2 Co2 1.936(3) . ?
N3 O8 1.025(11) . ?
N3 N3 1.052(15) 8_565 ?
N3 O9 1.260(9) . ?
N3 O10 1.386(10) . ?
O1 Mn1 1.850(3) . ?
O1 Co1 1.875(3) . ?
O1 Co2 1.882(3) . ?
O2 Mn1 1.846(4) . ?
O2 Co2 1.887(2) . ?
O2 Co2 1.887(2) 8_565 ?
O3 Co2 1.865(2) . ?
O3 Co2 1.865(2) 8_565 ?
O3 Co1 1.865(4) . ?
O4 Co1 1.923(3) . ?
O5 Co2 1.922(3) . ?
O6 Mn1 1.989(3) . ?
O7 Co2 1.939(3) . ?
O8 N3 1.025(11) 8_565 ?
O8 Mn1 1.905(6) . ?
O10 N3 1.386(10) 8_565 ?
Mn1 O1 1.850(3) 8_565 ?
Mn1 O6 1.989(3) 8_565 ?
Mn1 Co2 2.6894(10) 8_565 ?
Mn1 Co2 2.6894(10) . ?
Mn1 Co1 2.8308(13) . ?
Co1 O1 1.875(3) 8_565 ?
Co1 O4 1.923(3) 8_565 ?
Co1 Co2 2.7041(10) 8_565 ?
Co1 Co2 2.7042(10) . ?
Co2 Co2 2.8306(16) 8_565 ?
 
loop_
 _geom_angle_atom_site_label_1
 _geom_angle_atom_site_label_2
 _geom_angle_atom_site_label_3
 _geom_angle
 _geom_angle_site_symmetry_1
 _geom_angle_site_symmetry_3
 _geom_angle_publ_flag
N1 C1 C2 122.3(5) . . ?
N1 C1 H1 118.9 . . ?
C2 C1 H1 118.9 . . ?
C3 C2 C1 118.9(5) . . ?
C3 C2 H2 120.6 . . ?
C1 C2 H2 120.6 . . ?
C2 C3 C2 119.4(6) . 8_565 ?
C2 C3 H3 120.3 . . ?
C2 C3 H3 120.3 8_565 . ?
N2 C4 C5 122.0(4) . . ?
N2 C4 H4 119.0 . . ?
C5 C4 H4 119.0 . . ?
C4 C5 C6 119.5(5) . . ?
C4 C5 H5 120.2 . . ?
C6 C5 H5 120.2 . . ?
C7 C6 C5 118.7(5) . . ?
C7 C6 H6 120.6 . . ?
C5 C6 H6 120.6 . . ?
C6 C7 C8 118.7(4) . . ?
C6 C7 H7 120.7 . . ?
C8 C7 H7 120.7 . . ?
N2 C8 C7 123.0(4) . . ?
N2 C8 H8 118.5 . . ?
C7 C8 H8 118.5 . . ?
O7 C9 O6 127.1(4) . . ?
O7 C9 C10 116.5(4) . . ?
O6 C9 C10 116.3(4) . . ?
C9 C10 H10A 109.5 . . ?
C9 C10 H10B 109.5 . . ?
H10A C10 H10B 109.5 . . ?
C9 C10 H10C 109.5 . . ?
H10A C10 H10C 109.5 . . ?
H10B C10 H10C 109.5 . . ?
O4 C11 O5 126.8(4) . . ?
O4 C11 C12 117.2(4) . . ?
O5 C11 C12 115.9(4) . . ?
C11 C12 H12A 109.5 . . ?
C11 C12 H12B 109.5 . . ?
H12A C12 H12B 109.5 . . ?
C11 C12 H12C 109.5 . . ?
H12A C12 H12C 109.5 . . ?
H12B C12 H12C 109.5 . . ?
Cl1 C13 Cl2 113.3(7) . . ?
Cl1 C13 H13A 108.9 . . ?
Cl2 C13 H13A 108.9 . . ?
Cl1 C13 H13B 108.9 . . ?
Cl2 C13 H13B 108.9 . . ?
H13A C13 H13B 107.7 . . ?
Cl3 C14 Cl4 116.1(5) . . ?
Cl3 C14 H14A 108.3 . . ?
Cl4 C14 H14A 108.3 . . ?
Cl3 C14 H14B 108.3 . . ?
Cl4 C14 H14B 108.3 . . ?
H14A C14 H14B 107.4 . . ?
Cl5 C15 Cl5 121.4(9) 8_565 . ?
Cl5 C15 H15A 107.0 8_565 . ?
Cl5 C15 H15A 107.0 . . ?
Cl5 C15 H15B 107.0 8_565 . ?
Cl5 C15 H15B 107.0 . . ?
H15A C15 H15B 106.7 . . ?
Cl6 C16 Cl6 112.3(5) 8_565 . ?
Cl6 C16 H16A 109.2 8_565 . ?
Cl6 C16 H16A 109.2 . . ?
Cl6 C16 H16B 109.2 8_565 . ?
Cl6 C16 H16B 109.2 . . ?
H16A C16 H16B 107.9 . . ?
C1 N1 C1 118.3(5) . 8_565 ?
C1 N1 Co1 120.8(3) . . ?
C1 N1 Co1 120.8(3) 8_565 . ?
C8 N2 C4 118.0(4) . . ?
C8 N2 Co2 121.8(3) . . ?
C4 N2 Co2 120.3(3) . . ?
O8 N3 N3 59.1(4) . 8_565 ?
O8 N3 O9 113.1(9) . . ?
N3 N3 O9 166.0(7) 8_565 . ?
O8 N3 O10 124.5(7) . . ?
N3 N3 O10 67.7(4) 8_565 . ?
O9 N3 O10 122.2(10) . . ?
Mn1 O1 Co1 98.93(13) . . ?
Mn1 O1 Co2 92.21(12) . . ?
Co1 O1 Co2 92.07(12) . . ?
Mn1 O2 Co2 92.16(14) . . ?
Mn1 O2 Co2 92.16(14) . 8_565 ?
Co2 O2 Co2 97.19(17) . 8_565 ?
Co2 O3 Co2 98.71(17) . 8_565 ?
Co2 O3 Co1 92.91(13) . . ?
Co2 O3 Co1 92.91(13) 8_565 . ?
C11 O4 Co1 122.7(3) . . ?
C11 O5 Co2 122.8(3) . . ?
C9 O6 Mn1 122.7(3) . . ?
C9 O7 Co2 122.0(3) . . ?
N3 O8 N3 61.7(8) . 8_565 ?
N3 O8 Mn1 148.6(5) . . ?
N3 O8 Mn1 148.6(5) 8_565 . ?
N3 O10 N3 44.6(8) 8_565 . ?
O2 Mn1 O1 88.35(12) . 8_565 ?
O2 Mn1 O1 88.35(12) . . ?
O1 Mn1 O1 81.60(17) 8_565 . ?
O2 Mn1 O8 172.6(3) . . ?
O1 Mn1 O8 97.2(3) 8_565 . ?
O1 Mn1 O8 97.2(3) . . ?
O2 Mn1 O6 86.70(12) . 8_565 ?
O1 Mn1 O6 89.93(12) 8_565 8_565 ?
O1 Mn1 O6 170.31(12) . 8_565 ?
O8 Mn1 O6 88.4(2) . 8_565 ?
O2 Mn1 O6 86.70(12) . . ?
O1 Mn1 O6 170.31(12) 8_565 . ?
O1 Mn1 O6 89.93(12) . . ?
O8 Mn1 O6 88.4(2) . . ?
O6 Mn1 O6 98.10(18) 8_565 . ?
O2 Mn1 Co2 44.52(8) . 8_565 ?
O1 Mn1 Co2 44.37(8) 8_565 8_565 ?
O1 Mn1 Co2 88.45(9) . 8_565 ?
O8 Mn1 Co2 140.08(18) . 8_565 ?
O6 Mn1 Co2 82.18(9) 8_565 8_565 ?
O6 Mn1 Co2 131.21(10) . 8_565 ?
O2 Mn1 Co2 44.51(8) . . ?
O1 Mn1 Co2 88.45(9) 8_565 . ?
O1 Mn1 Co2 44.37(8) . . ?
O8 Mn1 Co2 140.08(18) . . ?
O6 Mn1 Co2 131.21(10) 8_565 . ?
O6 Mn1 Co2 82.18(9) . . ?
Co2 Mn1 Co2 63.50(4) 8_565 . ?
O2 Mn1 Co1 85.22(12) . . ?
O1 Mn1 Co1 40.87(8) 8_565 . ?
O1 Mn1 Co1 40.87(8) . . ?
O8 Mn1 Co1 102.2(3) . . ?
O6 Mn1 Co1 130.23(9) 8_565 . ?
O6 Mn1 Co1 130.23(9) . . ?
Co2 Mn1 Co1 58.60(3) 8_565 . ?
Co2 Mn1 Co1 58.60(3) . . ?
O3 Co1 O1 86.88(12) . 8_565 ?
O3 Co1 O1 86.88(12) . . ?
O1 Co1 O1 80.27(17) 8_565 . ?
O3 Co1 O4 88.63(12) . 8_565 ?
O1 Co1 O4 91.07(12) 8_565 8_565 ?
O1 Co1 O4 170.45(12) . 8_565 ?
O3 Co1 O4 88.63(12) . . ?
O1 Co1 O4 170.45(12) 8_565 . ?
O1 Co1 O4 91.07(12) . . ?
O4 Co1 O4 97.25(17) 8_565 . ?
O3 Co1 N1 179.94(18) . . ?
O1 Co1 N1 93.16(14) 8_565 . ?
O1 Co1 N1 93.17(14) . . ?
O4 Co1 N1 91.33(13) 8_565 . ?
O4 Co1 N1 91.33(13) . . ?
O3 Co1 Co2 43.54(8) . 8_565 ?
O1 Co1 Co2 44.08(8) 8_565 8_565 ?
O1 Co1 Co2 87.50(9) . 8_565 ?
O4 Co1 Co2 83.44(9) 8_565 8_565 ?
O4 Co1 Co2 132.17(9) . 8_565 ?
N1 Co1 Co2 136.49(10) . 8_565 ?
O3 Co1 Co2 43.54(7) . . ?
O1 Co1 Co2 87.50(9) 8_565 . ?
O1 Co1 Co2 44.07(8) . . ?
O4 Co1 Co2 132.17(9) 8_565 . ?
O4 Co1 Co2 83.45(9) . . ?
N1 Co1 Co2 136.49(10) . . ?
Co2 Co1 Co2 63.12(4) 8_565 . ?
O3 Co1 Mn1 83.37(12) . . ?
O1 Co1 Mn1 40.20(8) 8_565 . ?
O1 Co1 Mn1 40.20(8) . . ?
O4 Co1 Mn1 130.80(9) 8_565 . ?
O4 Co1 Mn1 130.80(9) . . ?
N1 Co1 Mn1 96.68(15) . . ?
Co2 Co1 Mn1 58.09(2) 8_565 . ?
Co2 Co1 Mn1 58.09(2) . . ?
O3 Co2 O1 86.67(14) . . ?
O3 Co2 O2 82.00(12) . . ?
O1 Co2 O2 86.22(14) . . ?
O3 Co2 O5 91.75(13) . . ?
O1 Co2 O5 88.04(12) . . ?
O2 Co2 O5 171.73(13) . . ?
O3 Co2 N2 94.44(15) . . ?
O1 Co2 N2 178.86(13) . . ?
O2 Co2 N2 93.68(15) . . ?
O5 Co2 N2 92.18(14) . . ?
O3 Co2 O7 172.66(13) . . ?
O1 Co2 O7 87.72(12) . . ?
O2 Co2 O7 92.93(13) . . ?
O5 Co2 O7 92.78(13) . . ?
N2 Co2 O7 91.16(14) . . ?
O3 Co2 Mn1 87.50(10) . . ?
O1 Co2 Mn1 43.41(8) . . ?
O2 Co2 Mn1 43.32(11) . . ?
O5 Co2 Mn1 131.43(9) . . ?
N2 Co2 Mn1 136.32(11) . . ?
O7 Co2 Mn1 85.18(9) . . ?
O3 Co2 Co1 43.55(11) . . ?
O1 Co2 Co1 43.86(8) . . ?
O2 Co2 Co1 88.20(10) . . ?
O5 Co2 Co1 83.54(9) . . ?
N2 Co2 Co1 137.27(11) . . ?
O7 Co2 Co1 131.42(9) . . ?
Mn1 Co2 Co1 63.31(3) . . ?
O3 Co2 Co2 40.64(9) . 8_565 ?
O1 Co2 Co2 83.69(8) . 8_565 ?
O2 Co2 Co2 41.40(8) . 8_565 ?
O5 Co2 Co2 131.92(9) . 8_565 ?
N2 Co2 Co2 96.98(11) . 8_565 ?
O7 Co2 Co2 133.85(9) . 8_565 ?
Mn1 Co2 Co2 58.25(2) . 8_565 ?
Co1 Co2 Co2 58.440(19) . 8_565 ?
 
_refine_diff_density_max    1.120
_refine_diff_density_min   -1.183
_refine_diff_density_rms    0.125

_shelxl_version_number 2013-4

_shelx_res_file
;
TITL ain7130a_0ma in Pnma
CELL  0.71073  17.9570  11.1960  21.8360   90.000   90.000   90.000
ZERR     8.00   0.0050   0.0050   0.0050    0.005    0.005    0.005
LATT   1
SYMM  1/2 - X, - Y, 1/2 + Z
SYMM  1/2 + X, 1/2 - Y, 1/2 - Z
SYMM  - X, 1/2 + Y, - Z
SFAC  C    H    N    O    MN   CO   CL
UNIT  108 140 20 64 4 12 32
MERG   2
FMAP   2
PLAN   25
SIZE     0.100   0.050   0.050
ACTA    50.00
BOND   $H
LIST   4
WPDB  -2
L.S.  16
TEMP   200.00
WGHT    0.099600   15.343301
FVAR       0.07019
C1    1    0.456086    0.147281    0.487464    11.00000    0.05012    0.02561 =
         0.03269    0.00099    0.00166    0.00698
AFIX  43
H1    2    0.447247    0.075561    0.507683    11.00000   -1.20000
AFIX   0
C2    1    0.480344    0.144239    0.427718    11.00000    0.06145    0.03908 =
         0.03261   -0.00680    0.00561    0.01380
AFIX  43
H2    2    0.488551    0.071683    0.408112    11.00000   -1.20000
AFIX   0
C3    1    0.492224    0.250000    0.397550    10.50000    0.05266    0.05588 =
         0.02760    0.00000    0.00711    0.00000
AFIX  43
H3    2    0.508178    0.250000    0.357031    10.50000   -1.20000
AFIX   0
C4    1    0.445061    0.092099    0.835212    11.00000    0.02741    0.08317 =
         0.03314    0.00310   -0.00225    0.00452
AFIX  43
H4    2    0.496368    0.096549    0.829871    11.00000   -1.20000
AFIX   0
C5    1    0.417239    0.075042    0.892908    11.00000    0.04566    0.10140 =
         0.03022    0.00828   -0.00584    0.00706
AFIX  43
H5    2    0.449374    0.066410    0.926013    11.00000   -1.20000
AFIX   0
C6    1    0.341010    0.070734    0.901632    11.00000    0.05252    0.06493 =
         0.03369    0.00534    0.01261    0.00068
AFIX  43
H6    2    0.321185    0.059773    0.940575    11.00000   -1.20000
AFIX   0
C7    1    0.295280    0.082911    0.851856    11.00000    0.02978    0.06187 =
         0.04435    0.00308    0.00998   -0.00872
AFIX  43
H7    2    0.243793    0.081471    0.856401    11.00000   -1.20000
AFIX   0
C8    1    0.326983    0.097315    0.794993    11.00000    0.03201    0.04666 =
         0.03554    0.00544   -0.00200   -0.00351
AFIX  43
H8    2    0.295793    0.103677    0.761149    11.00000   -1.20000
AFIX   0
C9    1    0.586638    0.021951    0.711506    11.00000    0.03111    0.02714 =
         0.03612   -0.00277   -0.00543    0.00579
C10   1    0.638912   -0.080173    0.724593    11.00000    0.03956    0.03294 =
         0.08234    0.00361   -0.00289    0.01118
AFIX 137
H10A  2    0.642180   -0.130783    0.689206    11.00000   -1.50000
H10B  2    0.620467   -0.125501    0.758691    11.00000   -1.50000
H10C  2    0.687394   -0.049304    0.734222    11.00000   -1.50000
AFIX   0
C11   1    0.341724    0.027140    0.619879    11.00000    0.02865    0.02493 =
         0.03634   -0.00366    0.00031   -0.00278
C12   1    0.296396   -0.075460    0.596134    11.00000    0.05491    0.03121 =
         0.05526   -0.00085   -0.01624   -0.01460
AFIX 137
H12A  2    0.260158   -0.046363    0.567460    11.00000   -1.50000
H12B  2    0.271463   -0.113954    0.629643    11.00000   -1.50000
H12C  2    0.328563   -0.131713    0.576104    11.00000   -1.50000
AFIX   0
C13   1    0.223568    0.250000    0.492112    10.50000    0.11823    0.12462 =
         0.08039    0.00000   -0.04790    0.00000
AFIX  23
H13A  2    0.237266    0.319977    0.515758    10.50000   -1.20000
H13B  2    0.237266    0.180023    0.515757    10.50000   -1.20000
AFIX   0
C14   1    0.402206    0.750000    0.752455    10.50000    0.07225    0.04257 =
         0.06438    0.00000    0.02762    0.00000
AFIX  23
H14A  2    0.415758    0.680185    0.728628    10.50000   -1.20000
H14B  2    0.415758    0.819815    0.728628    10.50000   -1.20000
AFIX   0
C15   1    0.873849    0.250000    0.446417    10.50000    0.07773    0.07666 =
         0.40381    0.00000    0.07131    0.00000
AFIX  23
H15A  2    0.831203    0.250001    0.419152    10.50000   -1.20000
H15B  2    0.854377    0.249998    0.487852    10.50000   -1.20000
AFIX   0
C16   1    0.190606    0.250000    0.681103    10.50000    0.04386    0.05310 =
         0.05498    0.00000    0.00495    0.00000
AFIX  23
H16A  2    0.178895    0.249998    0.724468    10.50000   -1.20000
H16B  2    0.244389    0.250000    0.676960    10.50000   -1.20000
AFIX   0
N1    3    0.444764    0.250000    0.517513    10.50000    0.03208    0.02415 =
         0.02474    0.00000    0.00016    0.00000
N2    3    0.400624    0.102593    0.786139    11.00000    0.02365    0.02709 =
         0.02732    0.00258    0.00118   -0.00217
N3    3    0.651740    0.203028    0.556365    11.00000    0.16404    0.06211 =
         0.11085    0.01968   -0.05372   -0.04921
O1    4    0.486023    0.142048    0.627314    11.00000    0.02425    0.01931 =
         0.02455   -0.00046    0.00245    0.00095
O2    4    0.505707    0.250000    0.730213    10.50000    0.01826    0.02237 =
         0.02361    0.00000    0.00010    0.00000
O3    4    0.380420    0.250000    0.684466    10.50000    0.02088    0.01863 =
         0.02381    0.00000    0.00138    0.00000
O4    4    0.343657    0.121113    0.587442    11.00000    0.02818    0.02407 =
         0.02801   -0.00064   -0.00481   -0.00135
O5    4    0.376096    0.008928    0.670026    11.00000    0.03179    0.02210 =
         0.03419    0.00282   -0.00225   -0.00449
O6    4    0.615747    0.115801    0.689713    11.00000    0.02682    0.02755 =
         0.04082   -0.00044   -0.00019    0.00539
O7    4    0.518338    0.003595    0.721978    11.00000    0.03147    0.02264 =
         0.03485    0.00355   -0.00163    0.00480
O8    4    0.618613    0.250000    0.586081    10.50000    0.05471    0.20103 =
         0.06436    0.00000    0.04398    0.00000
O9    4    0.635128    0.093857    0.553472    11.00000    0.15928    0.10214 =
         0.15284   -0.01813    0.03555   -0.01125
O10   4    0.713146    0.250000    0.526368    10.50000    0.03859    0.10350 =
         0.05108    0.00000    0.02537    0.00000
MN1   5    0.555596    0.250000    0.656270    10.50000    0.02010    0.02129 =
         0.02855    0.00000    0.00334    0.00000
CO1   6    0.411855    0.250000    0.603041    10.50000    0.02347    0.01785 =
         0.02295    0.00000    0.00001    0.00000
CO2   6    0.443115    0.123590    0.705387    11.00000    0.02142    0.01910 =
         0.02480    0.00221   -0.00007   -0.00074
CL1   7    0.271325    0.250000    0.427163    10.50000    0.10352    0.32444 =
         0.08997    0.00000   -0.00713    0.00000
CL2   7    0.127560    0.250000    0.481168    10.50000    0.10067    0.22295 =
         0.10232    0.00000   -0.03403    0.00000
CL3   7    0.454328    0.750000    0.818465    10.50000    0.14880    0.11445 =
         0.08822    0.00000   -0.03198    0.00000
CL4   7    0.305195    0.750000    0.762066    10.50000    0.06186    0.07538 =
         0.14305    0.00000    0.04380    0.00000
CL5   7    0.917970    0.119095    0.436350    11.00000    0.09487    0.08622 =
         0.09633   -0.01408    0.01174    0.00801
CL6   7    0.154696    0.120287    0.647623    11.00000    0.06259    0.06428 =
         0.07972   -0.01354    0.01977   -0.01448
HKLF    4

REM  ain7130a_0ma in Pnma
REM R1 =  0.0515 for    4009 Fo > 4sig(Fo)  and  0.0623 for all    4748 data
REM    297 parameters refined using      0 restraints

END

WGHT      0.0976     15.7256

REM Highest difference peak  1.120,  deepest hole -1.183,  1-sigma level  0.125
Q1    1   0.4518  0.8032  0.7796  11.00000  0.05    1.12
Q2    1   0.2890  0.1669  0.4437  11.00000  0.05    0.79
Q3    1   0.2562  0.2500  0.4149  10.50000  0.05    0.74
Q4    1   0.8969  0.1685  0.3962  11.00000  0.05    0.67
Q5    1   0.1629  0.1861  0.4897  11.00000  0.05    0.59
Q6    1   0.3849  0.8091  0.7897  11.00000  0.05    0.54
Q7    1   0.9140  0.2500  0.4722  10.50000  0.05    0.49
Q8    1   0.9613  0.2500  0.4604  10.50000  0.05    0.45
Q9    1   0.9603  0.1670  0.4609  11.00000  0.05    0.42
Q10   1   0.3234  0.1255  0.5750  11.00000  0.05    0.41
Q11   1   0.3778  0.0406  0.8921  11.00000  0.05    0.41
Q12   1   0.3951  0.7500  0.8289  10.50000  0.05    0.40
Q13   1   0.4720  0.2500  0.6012  10.50000  0.05    0.37
Q14   1   0.4606  0.2500  0.7265  10.50000  0.05    0.36
Q15   1   0.2212  0.2500  0.5067  10.50000  0.05    0.35
Q16   1   0.5250  0.2500  0.7196  10.50000  0.05    0.34
Q17   1   0.4128 -0.0041  0.6013  11.00000  0.05    0.34
Q18   1   0.3635  0.0248  0.6391  11.00000  0.05    0.33
Q19   1   0.5191  0.1824  0.6314  11.00000  0.05    0.32
Q20   1   0.3229  0.0406  0.8630  11.00000  0.05    0.32
Q21   1   0.1192  0.2500  0.5414  10.50000  0.05    0.31
Q22   1   0.5253 -0.0150  0.7073  11.00000  0.05    0.31
Q23   1   0.9060  0.2500  0.3766  10.50000  0.05    0.31
Q24   1   0.4174  0.2500  0.5291  10.50000  0.05    0.31
Q25   1   0.5404  0.2500  0.3569  10.50000  0.05    0.31
;
_shelx_res_checksum   77723

_shelx_hkl_file
;
   0  -1   0   -0.66    0.03
   0   1   0   -0.74    0.02
   0  -2   0  509.78   13.35
   0  -2   0  492.11   14.02
   0  -2   0  488.28   13.85
   0   2   0  499.70   13.91
   0   2   0  485.83   13.34
   0  -3   0   -1.01    0.07
   0  -3   0   -0.90    0.06
   0  -3   0   -1.09    0.08
   0   3   0   -0.89    0.06
   0   3   0   -0.97    0.06
   0   3   0   -0.82    0.03
   0   3   0   -0.83    0.08
   0  -4   0   24.06    0.87
   0  -4   0   22.98    0.98
   0  -4   0   23.62    0.93
   0   4   0   23.23    0.82
   0   4   0   24.35    0.89
   0   4   0   23.59    0.91
   0   4   0   23.54    0.74
   0  -5   0    0.05    0.08
   0  -5   0    0.12    0.15
   0  -5   0    0.26    0.14
   0   5   0    0.13    0.16
   0   5   0    0.11    0.09
   0   5   0    0.23    0.10
   0  -6   0  609.25   16.63
   0  -6   0  599.39   17.24
   0  -6   0  608.33   17.34
   0   6   0  599.75   17.16
   0   6   0  646.05   17.18
   0  -7   0   -0.02    0.26
   0  -7   0   -0.53    0.14
   0  -7   0    0.03    0.20
   0   7   0   -0.25    0.16
   0   7   0   -0.40    0.23
   0  -8   0  949.54   26.75
   0  -8   0 1000.00   26.91
   0  -8   0  944.64   25.76
   0   8   0  934.67   26.59
   0   8   0  932.47   26.57
   0  -9   0    0.73    0.32
   0  -9   0    0.37    0.34
   0   9   0    0.22    0.42
   0   9   0    0.50    0.23
   0 -10   0   21.49    1.16
   0 -10   0   22.97    1.39
   0  10   0   22.82    1.42
   0 -11   0   -0.01    0.27
   0  11   0   -0.09    0.32
   0 -12   0    1.87    0.48
   0  12   0    1.31    0.52
   0 -13   0   -0.03    0.33
   0 -14   0   13.94    1.14
   1 -13   0   -0.32    0.34
  -1  12   0   -0.42    0.33
   1 -12   0    0.22    0.34
  -1  11   0   -0.49    0.29
   1 -11   0    0.45    0.31
  -1  10   0    0.24    0.34
   1 -10   0    0.36    0.28
   1 -10   0    0.11    0.30
  -1   9   0    2.64    0.67
  -1   8   0    0.03    0.39
  -1   8   0   -0.11    0.24
   1  -8   0    0.27    0.30
   1  -8   0    0.39    0.36
  -1   7   0   -0.41    0.14
  -1   7   0    0.01    0.28
   1  -7   0   -0.17    0.21
   1  -7   0   -0.43    0.18
  -1   6   0   -0.02    0.13
   1  -6   0    0.17    0.17
   1  -6   0    0.41    0.21
  -1   5   0   -0.05    0.09
  -1   5   0   -0.08    0.04
   1  -5   0   -0.07    0.13
   1  -5   0   -0.03    0.06
   1  -5   0   -0.08    0.11
  -1   4   0   -0.32    0.08
  -1   4   0   -0.25    0.04
   1  -4   0   -0.33    0.10
   1  -4   0   -0.37    0.05
   1  -4   0   -0.30    0.07
  -1   3   0    0.09    0.08
  -1   3   0    0.46    0.12
  -1   3   0    0.02    0.03
  -1   3   0    0.07    0.04
   1  -3   0   -0.01    0.09
   1  -3   0    0.22    0.08
   1  -3   0   -0.01    0.04
  -1   2   0   -0.01    0.03
  -1   2   0   -0.06    0.05
  -1   2   0   -0.01    0.07
   1  -2   0   -0.02    0.03
   1  -2   0   -0.04    0.06
  -1   1   0   -0.02    0.04
  -1   1   0    0.09    0.04
  -1   1   0   -0.01    0.02
  -1   1   0    0.00    0.02
  -1   1   0   -0.07    0.02
   1  -1   0   -0.04    0.02
   1  -1   0   -0.08    0.03
  -1   0   0   -1.01    0.02
  -1   0   0   -1.01    0.02
   1   0   0   -1.02    0.02
   1   0   0   -1.00    0.02
   1   0   0   -0.94    0.02
  -1  -1   0    0.01    0.03
  -1  -1   0   -0.06    0.02
  -1  -1   0    0.02    0.04
  -1  -1   0   -0.03    0.02
  -1  -1   0   -0.02    0.04
   1   1   0    0.13    0.05
   1   1   0   -0.06    0.03
   1   1   0   -0.06    0.02
   1   1   0   -0.06    0.01
  -1  -2   0   -0.01    0.04
  -1  -2   0   -0.05    0.04
  -1  -2   0    0.00    0.07
   1   2   0    0.00    0.04
   1   2   0   -0.01    0.07
   1   2   0   -0.02    0.03
   1   2   0   -0.04    0.07
  -1  -3   0   -0.08    0.08
  -1  -3   0   -0.03    0.06
   1   3   0    0.02    0.04
   1   3   0    0.12    0.07
   1   3   0   -0.02    0.10
  -1  -4   0   -0.47    0.10
  -1  -4   0   -0.37    0.08
  -1  -4   0   -0.26    0.08
   1   4   0   -0.28    0.06
   1   4   0   -0.22    0.12
   1   4   0   -0.27    0.04
   1   4   0   -0.31    0.07
   1   4   0   -0.26    0.07
  -1  -5   0   -0.20    0.11
  -1  -5   0   -0.07    0.10
  -1  -5   0   -0.03    0.09
  -1  -5   0   -0.09    0.08
   1   5   0   -0.03    0.08
   1   5   0   -0.01    0.13
   1   5   0   -0.01    0.07
  -1  -6   0    0.01    0.13
  -1  -6   0    0.10    0.19
  -1  -6   0    0.16    0.15
   1   6   0   -0.07    0.18
   1   6   0    0.06    0.11
  -1  -7   0    0.09    0.17
  -1  -7   0   -0.12    0.21
  -1  -7   0   -0.18    0.14
   1   7   0   -0.17    0.12
   1   7   0   -0.44    0.20
   1   7   0    0.15    0.15
  -1  -8   0    0.52    0.34
  -1  -8   0    0.24    0.23
   1   8   0    0.25    0.38
   1   8   0    0.51    0.22
  -1  -9   0    0.49    0.33
  -1  -9   0    0.31    0.23
   1   9   0    0.41    0.39
  -1 -10   0    0.26    0.30
  -1 -10   0    0.09    0.24
   1  10   0   -0.33    0.27
  -1 -11   0   -0.27    0.24
   1  11   0   -0.07    0.31
  -1 -12   0   -0.53    0.24
   1  12   0   -0.09    0.36
  -1 -13   0   -0.01    0.30
   2 -13   0   -0.06    0.34
  -2  12   0   -0.54    0.32
   2 -12   0    0.03    0.34
  -2  11   0    0.51    0.42
   2 -11   0    0.10    0.32
  -2  10   0   20.37    1.36
   2 -10   0   20.47    1.20
   2 -10   0   19.58    1.31
  -2   9   0   12.04    1.08
  -2   9   0   14.17    0.85
   2  -9   0   14.57    1.06
   2  -9   0   13.63    0.95
  -2   8   0  189.01    6.12
  -2   8   0  208.05    6.44
   2  -8   0  209.15    6.29
   2  -8   0  218.26    6.24
  -2   7   0   24.01    1.09
  -2   7   0   25.49    0.83
   2  -7   0   24.31    1.17
   2  -7   0   27.37    1.28
  -2   6   0    1.03    0.25
  -2   6   0    0.94    0.15
   2  -6   0    0.66    0.22
   2  -6   0    1.09    0.19
  -2   5   0   14.41    0.70
  -2   5   0   14.74    0.54
   2  -5   0   15.21    0.58
   2  -5   0   14.00    0.74
  -2   4   0   16.46    0.59
  -2   4   0   18.66    0.74
  -2   4   0   16.78    0.51
   2  -4   0   16.03    0.74
   2  -4   0   16.65    0.60
   2  -4   0   16.10    0.60
  -2   3   0  602.11   15.57
  -2   3   0  592.57   16.50
  -2   3   0  605.31   16.68
   2  -3   0  592.70   16.68
   2  -3   0  587.92   16.41
  -2   2   0   41.74    1.26
  -2   2   0   43.13    1.37
  -2   2   0   40.76    1.29
  -2   2   0   43.13    1.17
   2  -2   0   41.24    1.26
   2  -2   0   40.80    1.36
  -2   1   0   66.98    1.81
  -2   1   0   62.98    1.89
  -2   1   0   67.85    1.98
  -2   1   0   72.93    1.98
  -2   1   0   66.06    1.91
   2  -1   0   63.78    1.89
   2  -1   0   66.55    1.98
   2  -1   0   65.30    1.80
   2  -1   0   64.72    1.91
  -2   0   0  700.45   19.16
  -2   0   0  687.05   18.14
  -2   0   0  709.21   19.02
  -2   0   0  659.00   22.20
  -2   0   0  693.13   19.32
  -2   0   0  652.86   18.86
  -2   0   0  701.68   19.31
   2   0   0  704.13   19.35
   2   0   0  784.87   19.37
   2   0   0  675.28   19.07
   2   0   0  667.83   21.76
   2   0   0  669.42   18.93
   2   0   0  676.36   18.68
   2   0   0  680.72   18.09
  -2  -1   0   64.78    1.85
  -2  -1   0   64.93    1.83
  -2  -1   0   66.48    1.83
  -2  -1   0   63.18    1.84
   2   1   0   64.80    1.80
   2   1   0   62.66    1.84
   2   1   0   62.87    1.84
   2   1   0   64.96    1.76
   2   1   0   63.32    1.82
   2   1   0   65.76    1.83
  -2  -2   0   42.19    1.21
  -2  -2   0   40.35    1.22
  -2  -2   0   42.27    1.33
  -2  -2   0   40.45    1.27
   2   2   0   43.69    1.29
   2   2   0   41.01    1.20
   2   2   0   42.35    1.20
   2   2   0   41.33    1.23
   2   2   0   41.27    1.31
   2   2   0   42.83    1.19
  -2  -3   0  588.31   16.48
  -2  -3   0  576.44   15.75
  -2  -3   0  574.24   16.47
   2   3   0  599.59   15.50
   2   3   0  593.31   16.25
   2   3   0  610.60   16.42
   2   3   0  591.11   15.76
   2   3   0  590.07   16.40
  -2  -4   0   16.20    0.61
  -2  -4   0   15.96    0.59
  -2  -4   0   15.68    0.73
   2   4   0   14.27    0.73
   2   4   0   14.08    0.70
   2   4   0   16.70    0.53
   2   4   0   16.20    0.57
   2   4   0   16.16    0.53
  -2  -5   0   18.98    0.74
  -2  -5   0   15.84    0.79
  -2  -5   0   14.59    0.64
  -2  -5   0   14.69    0.62
   2   5   0   14.43    0.79
   2   5   0   15.47    0.58
   2   5   0   15.33    0.52
   2   5   0   14.75    0.50
  -2  -6   0    0.74    0.20
  -2  -6   0    1.00    0.24
  -2  -6   0    0.43    0.21
  -2  -6   0    0.99    0.24
   2   6   0    1.04    0.10
   2   6   0    0.81    0.26
   2   6   0    0.82    0.17
   2   6   0    0.76    0.18
  -2  -7   0   26.22    1.08
  -2  -7   0   26.54    1.04
  -2  -7   0   25.85    1.10
  -2  -7   0   26.99    1.26
   2   7   0   25.24    1.01
   2   7   0   25.59    1.29
   2   7   0   27.38    0.96
  -2  -8   0  210.88    6.35
  -2  -8   0  215.39    6.48
  -2  -8   0  213.25    6.40
  -2  -8   0  221.15    6.45
   2   8   0  213.07    6.64
   2   8   0  218.60    6.22
   2   8   0  219.36    6.13
  -2  -9   0   13.49    0.83
  -2  -9   0   14.05    0.78
  -2  -9   0   14.00    0.79
  -2  -9   0   14.29    1.04
   2   9   0   11.02    0.98
   2   9   0   14.24    0.72
  -2 -10   0   19.03    0.98
  -2 -10   0   18.01    1.21
  -2 -10   0   19.89    1.05
   2  10   0   19.80    1.28
  -2 -11   0    0.66    0.32
   2  11   0    0.49    0.44
  -2 -12   0   -0.12    0.27
   2  12   0   -0.13    0.34
  -2 -13   0   -0.43    0.27
  -3  13   0   -0.97    0.29
   3 -13   0    0.08    0.38
  -3  12   0   -0.34    0.37
  -3  12   0   -0.27    0.34
   3 -12   0    0.15    0.37
  -3  11   0   -0.25    0.30
   3 -11   0   -0.07    0.32
  -3  10   0    0.16    0.33
   3 -10   0   -0.12    0.26
   3 -10   0    0.13    0.29
  -3   9   0    0.66    0.37
   3  -9   0    0.95    0.34
   3  -9   0    0.22    0.33
  -3   8   0    0.07    0.21
  -3   8   0   -0.06    0.10
   3  -8   0    0.31    0.29
   3  -8   0   -0.40    0.22
  -3   7   0   -0.07    0.16
  -3   7   0   -0.08    0.09
   3  -7   0   -0.03    0.20
   3  -7   0   -0.22    0.12
  -3   6   0    0.06    0.08
  -3   6   0   -0.17    0.11
   3  -6   0   -0.03    0.10
   3  -6   0   -0.03    0.16
  -3   5   0    0.02    0.06
  -3   5   0   -0.11    0.11
  -3   5   0    0.03    0.08
   3  -5   0   -0.02    0.13
   3  -5   0    0.04    0.07
  -3   4   0   -0.10    0.07
  -3   4   0   -0.03    0.13
  -3   4   0   -0.01    0.06
  -3   4   0   -0.08    0.10
   3  -4   0   -0.18    0.13
   3  -4   0   -0.12    0.07
  -3   3   0    0.02    0.06
  -3   3   0   -0.11    0.08
  -3   3   0    0.00    0.10
  -3   3   0   -0.02    0.12
  -3   3   0   -0.11    0.06
   3  -3   0   -0.01    0.07
   3  -3   0    0.00    0.11
  -3   2   0    0.00    0.07
  -3   2   0    0.04    0.09
  -3   2   0    0.01    0.06
  -3   2   0   -0.01    0.10
  -3   2   0   -0.10    0.08
   3  -2   0    0.01    0.08
   3  -2   0    0.03    0.10
   3  -2   0   -0.02    0.06
  -3   1   0   -0.08    0.05
  -3   1   0   -0.13    0.05
  -3   1   0   -0.02    0.08
  -3   1   0   -0.23    0.05
  -3   1   0   -0.08    0.06
   3  -1   0   -0.03    0.06
   3  -1   0   -0.21    0.07
   3  -1   0   -0.04    0.07
   3  -1   0   -0.09    0.05
   3  -1   0   -0.14    0.06
  -3   0   0    0.06    0.06
  -3   0   0    0.05    0.06
  -3   0   0    0.05    0.04
  -3   0   0    0.00    0.05
  -3   0   0   -0.05    0.04
  -3   0   0    0.08    0.04
  -3   0   0   -0.01    0.05
   3   0   0    0.03    0.05
   3   0   0    0.02    0.05
   3   0   0    0.01    0.03
   3   0   0    0.03    0.06
   3   0   0   -0.04    0.04
   3   0   0   -0.01    0.05
   3   0   0    0.02    0.06
  -3  -1   0   -0.13    0.02
  -3  -1   0   -0.12    0.05
  -3  -1   0   -0.12    0.06
  -3  -1   0   -0.19    0.05
  -3  -1   0   -0.15    0.04
  -3  -1   0    0.00    0.06
   3   1   0    0.00    0.03
   3   1   0   -0.05    0.07
   3   1   0   -0.13    0.04
   3   1   0   -0.18    0.05
   3   1   0   -0.07    0.05
   3   1   0   -0.10    0.07
   3   1   0   -0.11    0.04
  -3  -2   0    0.01    0.06
  -3  -2   0    0.04    0.05
  -3  -2   0    0.09    0.08
  -3  -2   0   -0.03    0.07
  -3  -2   0    0.01    0.08
  -3  -2   0    0.01    0.05
   3   2   0    0.03    0.04
   3   2   0   -0.01    0.04
   3   2   0   -0.03    0.08
   3   2   0   -0.08    0.05
   3   2   0    0.04    0.08
   3   2   0   -0.02    0.06
  -3  -3   0   -0.15    0.04
  -3  -3   0   -0.02    0.10
  -3  -3   0   -0.01    0.10
  -3  -3   0    0.04    0.06
   3   3   0   -0.06    0.05
   3   3   0   -0.01    0.04
   3   3   0   -0.05    0.06
   3   3   0   -0.09    0.09
   3   3   0    0.05    0.10
  -3  -4   0   -0.10    0.06
  -3  -4   0    0.04    0.08
  -3  -4   0   -0.09    0.11
   3   4   0   -0.09    0.13
   3   4   0   -0.02    0.07
   3   4   0    0.03    0.06
   3   4   0   -0.08    0.13
   3   4   0   -0.04    0.05
  -3  -5   0   -0.06    0.16
  -3  -5   0    0.02    0.09
  -3  -5   0   -0.07    0.09
   3   5   0   -0.03    0.05
   3   5   0   -0.16    0.13
   3   5   0    0.05    0.07
   3   5   0   -0.07    0.13
   3   5   0    0.03    0.06
  -3  -6   0    0.01    0.10
  -3  -6   0    0.13    0.15
  -3  -6   0   -0.08    0.15
  -3  -6   0    0.08    0.11
   3   6   0    0.17    0.18
   3   6   0    0.03    0.05
   3   6   0    0.02    0.06
  -3  -7   0   -0.07    0.15
  -3  -7   0    0.09    0.13
  -3  -7   0   -0.13    0.14
  -3  -7   0   -0.17    0.18
   3   7   0   -0.12    0.21
   3   7   0   -0.39    0.12
   3   7   0   -0.04    0.05
   3   7   0    0.04    0.08
  -3  -8   0   -0.08    0.18
  -3  -8   0    0.22    0.27
  -3  -8   0    0.03    0.16
  -3  -8   0    0.08    0.18
   3   8   0   -0.16    0.19
   3   8   0   -0.12    0.27
  -3  -9   0   -0.12    0.26
  -3  -9   0   -0.04    0.18
  -3  -9   0   -0.02    0.17
  -3  -9   0    0.13    0.20
   3   9   0   -0.08    0.17
   3   9   0   -0.31    0.28
  -3 -10   0   -0.06    0.20
  -3 -10   0    0.26    0.21
  -3 -10   0   -0.04    0.30
   3  10   0    0.29    0.32
  -3 -11   0   -0.01    0.24
  -3 -11   0   -0.01    0.24
   3  11   0   -0.58    0.27
  -3 -12   0   -0.26    0.27
   3  12   0    0.51    0.41
  -3 -13   0   -0.23    0.28
  -4  13   0    9.20    1.06
   4 -13   0   10.59    1.08
  -4  12   0    0.05    0.46
  -4  12   0    0.09    0.36
   4 -12   0    0.09    0.38
  -4  11   0    6.28    0.80
  -4  11   0    6.74    1.00
   4 -11   0    5.51    0.81
  -4  10   0    8.27    0.94
  -4  10   0    8.80    0.84
   4 -10   0   10.33    0.93
   4 -10   0    9.34    0.88
  -4   9   0   28.38    1.36
  -4   9   0   30.31    1.64
  -4   9   0   30.76    1.45
   4  -9   0   31.95    1.56
   4  -9   0   28.03    1.46
  -4   8   0   12.98    0.82
  -4   8   0   11.74    0.84
  -4   8   0   11.98    0.57
   4  -8   0   11.01    0.88
   4  -8   0   12.40    0.60
   4  -8   0   12.26    0.88
  -4   7   0  136.37    4.20
  -4   7   0  138.43    3.95
  -4   7   0  134.41    4.28
   4  -7   0  132.00    4.34
   4  -7   0  136.53    3.91
  -4   6   0   44.71    1.44
  -4   6   0   39.95    1.63
  -4   6   0   43.33    1.63
   4  -6   0   45.32    1.46
   4  -6   0   42.98    1.70
  -4   5   0  133.49    4.10
  -4   5   0  136.52    3.61
  -4   5   0  131.83    3.86
  -4   5   0  133.51    3.98
   4  -5   0  126.34    4.13
   4  -5   0  135.44    3.88
  -4   4   0   16.47    0.59
  -4   4   0   15.88    0.65
  -4   4   0   14.33    0.71
  -4   4   0   16.18    0.77
   4  -4   0   15.24    0.79
   4  -4   0   15.52    0.66
  -4   3   0  132.47    3.97
  -4   3   0  127.28    3.92
  -4   3   0  128.85    3.77
  -4   3   0  130.91    3.77
  -4   3   0  134.11    3.55
   4  -3   0  132.73    3.78
   4  -3   0  126.88    3.94
   4  -3   0  128.58    3.80
  -4   2   0   28.29    1.05
  -4   2   0   25.24    0.94
  -4   2   0   27.45    0.95
  -4   2   0   28.16    1.02
  -4   2   0   27.02    0.88
   4  -2   0   27.31    1.03
   4  -2   0   28.18    0.96
   4  -2   0   25.93    0.96
  -4   1   0  543.48   14.92
  -4   1   0  562.15   15.35
  -4   1   0  491.57   15.30
  -4   1   0  540.19   15.30
  -4   1   0  563.92   15.02
  -4   1   0  566.88   14.31
   4  -1   0  567.62   15.22
   4  -1   0  574.39   15.34
   4  -1   0  541.94   15.33
   4  -1   0  544.56   14.50
   4  -1   0  535.43   14.81
  -4   0   0  423.77   11.89
  -4   0   0  428.07   11.67
  -4   0   0  402.23   12.20
  -4   0   0  403.12   11.87
  -4   0   0  417.86   11.73
  -4   0   0  425.35   11.14
  -4   0   0  421.28   11.73
   4   0   0  411.44   11.66
   4   0   0  426.61   11.73
   4   0   0  486.38   11.90
   4   0   0  420.11   11.50
   4   0   0  417.45   11.13
   4   0   0  437.65   12.23
   4   0   0  424.60   11.87
  -4  -1   0  544.32   14.05
  -4  -1   0  559.78   15.15
  -4  -1   0  555.28   15.47
  -4  -1   0  542.42   15.39
  -4  -1   0  555.76   15.28
  -4  -1   0  566.41   14.44
   4   1   0  557.94   15.92
   4   1   0  551.32   15.47
   4   1   0  553.94   14.43
   4   1   0  558.41   15.20
   4   1   0  570.16   15.49
   4   1   0  524.25   15.12
   4   1   0  544.71   15.13
  -4  -2   0   26.85    0.86
  -4  -2   0   26.41    0.93
  -4  -2   0   26.55    0.92
  -4  -2   0   27.14    0.87
   4   2   0   26.76    0.92
   4   2   0   27.87    0.85
   4   2   0   27.95    0.84
   4   2   0   26.56    0.91
   4   2   0   28.65    0.99
   4   2   0   25.30    0.91
   4   2   0   26.65    0.89
  -4  -3   0  130.76    3.78
  -4  -3   0  133.19    3.77
  -4  -3   0  135.63    3.91
  -4  -3   0  129.47    3.77
   4   3   0  130.73    3.64
   4   3   0  132.03    3.80
   4   3   0  132.70    3.72
   4   3   0  132.93    3.80
   4   3   0  138.49    3.73
   4   3   0  132.42    3.87
  -4  -4   0   15.29    0.55
  -4  -4   0   14.05    0.70
  -4  -4   0   16.03    0.78
  -4  -4   0   15.16    0.57
   4   4   0   15.59    0.74
   4   4   0   15.21    0.74
   4   4   0   14.69    0.60
   4   4   0   15.73    0.60
   4   4   0   16.36    0.48
  -4  -5   0  126.52    3.76
  -4  -5   0  128.05    3.73
  -4  -5   0  130.01    3.86
   4   5   0  130.64    3.88
   4   5   0  131.11    3.70
   4   5   0  131.07    3.62
   4   5   0  131.21    3.57
   4   5   0  126.37    3.95
  -4  -6   0   45.10    1.42
  -4  -6   0   44.11    1.65
  -4  -6   0   41.27    1.44
   4   6   0   43.58    1.27
   4   6   0   42.90    1.35
   4   6   0   44.32    1.68
   4   6   0   44.20    1.70
  -4  -7   0  140.99    4.02
  -4  -7   0  134.12    4.20
  -4  -7   0  129.20    4.05
  -4  -7   0  135.05    4.29
   4   7   0  140.37    3.84
   4   7   0  135.04    4.34
  -4  -8   0   11.00    0.77
  -4  -8   0   12.69    0.88
  -4  -8   0   12.67    0.64
  -4  -8   0   11.31    0.66
   4   8   0   12.43    0.43
   4   8   0   11.70    0.89
   4   8   0   12.20    0.71
  -4  -9   0   29.28    1.18
  -4  -9   0   28.51    1.35
  -4  -9   0   31.07    1.51
  -4  -9   0   29.77    1.23
   4   9   0   29.68    1.55
   4   9   0   31.34    1.26
  -4 -10   0    8.21    0.72
  -4 -10   0    9.70    0.88
  -4 -10   0    7.78    0.63
   4  10   0    9.28    0.88
  -4 -11   0    5.65    0.68
  -4 -11   0    5.36    0.61
   4  11   0    5.47    0.80
  -4 -12   0   -0.39    0.25
   4  12   0    0.07    0.38
  -4 -13   0    8.03    0.80
  -5  13   0    0.04    0.40
   5 -13   0    0.37    0.43
  -5  12   0   -0.09    0.34
  -5  12   0    0.44    0.47
   5 -12   0   -0.43    0.33
  -5  11   0    0.26    0.41
  -5  11   0    0.12    0.34
   5 -11   0    0.03    0.36
  -5  10   0   -0.21    0.32
  -5  10   0   -0.36    0.25
   5 -10   0    0.02    0.31
   5 -10   0   -0.13    0.28
  -5   9   0   -0.24    0.23
  -5   9   0   -0.09    0.11
  -5   9   0    0.13    0.22
   5  -9   0   -0.05    0.14
   5  -9   0   -0.14    0.25
   5  -9   0   -0.26    0.28
  -5   8   0    0.01    0.25
  -5   8   0   -0.28    0.17
  -5   8   0   -0.04    0.12
   5  -8   0    0.01    0.15
   5  -8   0   -0.19    0.21
  -5   7   0   -0.09    0.12
  -5   7   0   -0.11    0.19
  -5   7   0   -0.18    0.21
   5  -7   0   -0.08    0.23
  -5   6   0    0.01    0.18
  -5   6   0   -0.18    0.10
  -5   6   0   -0.11    0.08
  -5   6   0   -0.13    0.18
   5  -6   0   -0.24    0.16
   5  -6   0   -0.14    0.11
  -5   5   0    0.05    0.09
  -5   5   0   -0.02    0.18
  -5   5   0   -0.10    0.18
  -5   5   0    0.11    0.11
   5  -5   0   -0.01    0.19
   5  -5   0    0.03    0.12
  -5   4   0   -0.29    0.12
  -5   4   0   -0.11    0.16
  -5   4   0   -0.08    0.10
  -5   4   0   -0.09    0.09
   5  -4   0   -0.26    0.14
   5  -4   0    0.00    0.11
  -5   3   0    0.00    0.10
  -5   3   0   -0.02    0.08
  -5   3   0    0.06    0.09
  -5   3   0   -0.06    0.11
   5  -3   0    0.10    0.12
   5  -3   0    0.14    0.10
   5  -3   0   -0.15    0.11
  -5   2   0   -0.16    0.10
  -5   2   0   -0.22    0.08
  -5   2   0   -0.24    0.08
  -5   2   0   -0.05    0.11
  -5   2   0   -0.20    0.09
   5  -2   0   -0.22    0.10
   5  -2   0   -0.17    0.07
   5  -2   0   -0.18    0.10
  -5   1   0    0.02    0.08
  -5   1   0    0.07    0.09
  -5   1   0    0.14    0.11
  -5   1   0   -0.05    0.07
  -5   1   0    0.02    0.08
  -5   1   0    0.01    0.03
  -5   1   0    0.08    0.08
   5  -1   0    0.05    0.08
   5  -1   0    0.06    0.10
   5  -1   0   -0.07    0.08
   5  -1   0   -0.11    0.07
   5  -1   0   -0.03    0.08
  -5   0   0    0.09    0.07
  -5   0   0    0.24    0.11
  -5   0   0    0.22    0.10
   5   0   0    0.11    0.10
   5   0   0    0.31    0.11
   5   0   0    0.12    0.09
   5   0   0    0.13    0.09
   5   0   0    0.13    0.10
   5   0   0    0.47    0.14
  -5  -1   0    0.01    0.09
  -5  -1   0    0.01    0.07
  -5  -1   0   -0.05    0.08
  -5  -1   0    0.02    0.07
  -5  -1   0   -0.05    0.05
  -5  -1   0    0.04    0.05
  -5  -1   0   -0.10    0.07
   5   1   0    0.03    0.05
   5   1   0   -0.03    0.07
   5   1   0   -0.04    0.08
   5   1   0   -0.03    0.06
   5   1   0    0.14    0.07
   5   1   0    0.01    0.08
   5   1   0   -0.04    0.07
  -5  -2   0   -0.13    0.08
  -5  -2   0   -0.22    0.07
  -5  -2   0   -0.12    0.08
  -5  -2   0   -0.11    0.06
  -5  -2   0   -0.15    0.07
   5   2   0   -0.21    0.07
   5   2   0   -0.17    0.09
   5   2   0   -0.15    0.07
   5   2   0   -0.18    0.05
   5   2   0   -0.14    0.06
   5   2   0   -0.13    0.10
   5   2   0   -0.10    0.04
   5   2   0   -0.22    0.08
  -5  -3   0    0.09    0.07
  -5  -3   0    0.10    0.07
  -5  -3   0    0.02    0.10
  -5  -3   0   -0.02    0.09
  -5  -3   0    0.02    0.08
   5   3   0    0.03    0.08
   5   3   0    0.11    0.11
   5   3   0    0.13    0.12
   5   3   0    0.07    0.05
   5   3   0   -0.01    0.05
   5   3   0   -0.01    0.08
  -5  -4   0   -0.05    0.07
  -5  -4   0   -0.21    0.12
  -5  -4   0    0.03    0.14
  -5  -4   0   -0.08    0.08
   5   4   0   -0.10    0.10
   5   4   0   -0.25    0.11
   5   4   0   -0.05    0.09
   5   4   0   -0.13    0.11
  -5  -5   0   -0.33    0.09
  -5  -5   0   -0.33    0.08
  -5  -5   0   -0.31    0.16
  -5  -5   0    0.11    0.16
   5   5   0    0.08    0.18
   5   5   0    0.08    0.17
   5   5   0    0.08    0.11
   5   5   0    0.05    0.10
  -5  -6   0   -0.11    0.09
  -5  -6   0   -0.03    0.11
  -5  -6   0    0.04    0.18
   5   6   0    0.01    0.08
   5   6   0    0.03    0.18
   5   6   0   -0.02    0.18
  -5  -7   0    0.01    0.19
  -5  -7   0    0.14    0.23
  -5  -7   0   -0.10    0.13
  -5  -7   0   -0.04    0.11
   5   7   0    0.17    0.09
   5   7   0   -0.30    0.17
  -5  -8   0   -0.25    0.26
  -5  -8   0    0.02    0.13
  -5  -8   0   -0.04    0.18
  -5  -8   0   -0.04    0.15
   5   8   0    0.03    0.08
   5   8   0   -0.08    0.23
  -5  -9   0   -0.06    0.21
  -5  -9   0    0.00    0.17
  -5  -9   0   -0.14    0.27
  -5  -9   0   -0.02    0.14
   5   9   0    0.05    0.18
   5   9   0    0.50    0.30
  -5 -10   0   -0.42    0.23
  -5 -10   0    0.07    0.22
  -5 -10   0   -0.04    0.18
   5  10   0   -0.07    0.26
  -5 -11   0   -0.48    0.25
  -5 -11   0    0.21    0.23
   5  11   0    0.28    0.34
  -5 -12   0   -0.29    0.31
  -5 -12   0    0.02    0.27
   5  12   0   -0.46    0.38
  -5 -13   0   -0.29    0.25
  -6  13   0   29.74    1.68
   6 -13   0   25.41    1.71
  -6  12   0    0.91    0.43
   6 -12   0    0.41    0.45
  -6  11   0   36.65    2.12
  -6  11   0   40.63    1.90
   6 -11   0   42.73    2.06
  -6  10   0    7.04    0.76
  -6  10   0    5.73    0.82
   6 -10   0    6.37    0.83
  -6   9   0    0.37    0.17
  -6   9   0    0.68    0.30
  -6   9   0    0.39    0.28
   6  -9   0    0.47    0.33
   6  -9   0    0.37    0.19
  -6   8   0   37.60    1.37
  -6   8   0   33.40    1.58
  -6   8   0   39.48    1.63
   6  -8   0   37.92    1.72
   6  -8   0   36.91    1.35
  -6   7   0    3.77    0.39
  -6   7   0    3.53    0.50
  -6   7   0    3.02    0.50
   6  -7   0    3.00    0.37
   6  -7   0    3.98    0.56
  -6   6   0   52.61    2.01
  -6   6   0   52.20    1.90
  -6   6   0   52.84    1.79
  -6   6   0   54.26    1.63
   6  -6   0   50.81    2.03
   6  -6   0   52.68    1.81
  -6   5   0  364.16   10.10
  -6   5   0  383.44    9.60
  -6   5   0  356.21   10.15
  -6   5   0  324.79   10.45
   6  -5   0  363.96   10.54
   6  -5   0  373.44   10.19
  -6   4   0   14.58    0.64
  -6   4   0   13.36    0.68
  -6   4   0   13.96    0.72
  -6   4   0   13.34    0.82
   6  -4   0   13.51    0.70
   6  -4   0   14.50    0.85
   6  -4   0   13.81    0.75
  -6   3   0  401.47   10.11
  -6   3   0  386.13   10.67
  -6   3   0  390.36   10.51
  -6   3   0  338.95   10.88
   6  -3   0  382.18   10.94
   6  -3   0  379.62   10.55
   6  -3   0  385.33   10.68
  -6   2   0   90.77    2.75
  -6   2   0   97.26    2.82
  -6   2   0   81.29    2.85
  -6   2   0   94.42    2.64
  -6   2   0   93.24    2.92
  -6   2   0   88.94    2.79
   6  -2   0   91.36    2.78
   6  -2   0   90.70    2.79
   6  -2   0   91.21    2.89
  -6   1   0   36.86    1.33
  -6   1   0   39.58    1.35
  -6   1   0   40.05    1.41
  -6   1   0   38.68    1.18
  -6   1   0   40.24    1.28
  -6   1   0   36.82    1.37
  -6   1   0   38.69    1.32
   6  -1   0   38.05    1.33
   6  -1   0   37.61    1.37
   6  -1   0   37.64    1.27
   6  -1   0   40.41    1.36
  -6   0   0   18.24    0.76
  -6   0   0   18.49    0.77
  -6   0   0   16.32    0.63
  -6   0   0   18.21    0.76
  -6   0   0   17.43    0.74
   6   0   0   17.96    0.74
   6   0   0   18.15    0.73
   6   0   0   18.69    0.76
   6   0   0   18.58    0.77
   6   0   0   17.66    0.74
   6   0   0   16.80    0.74
   6   0   0   18.25    0.63
  -6  -1   0   39.28    1.32
  -6  -1   0   38.51    1.24
  -6  -1   0   40.94    1.39
  -6  -1   0   39.76    1.31
  -6  -1   0   36.89    1.31
  -6  -1   0   38.93    1.10
  -6  -1   0   39.59    1.36
   6   1   0   43.43    1.32
   6   1   0   38.30    1.22
   6   1   0   37.37    1.29
   6   1   0   38.19    1.35
   6   1   0   39.37    1.30
   6   1   0   39.02    1.35
   6   1   0   39.47    1.32
  -6  -2   0   90.77    2.72
  -6  -2   0   89.52    2.71
  -6  -2   0   94.58    2.71
  -6  -2   0   93.77    2.68
  -6  -2   0   87.99    2.76
   6   2   0   89.29    2.67
   6   2   0   93.31    2.88
   6   2   0   89.94    2.69
   6   2   0   87.37    2.79
   6   2   0   92.28    2.78
   6   2   0   94.05    2.67
  -6  -3   0  382.30   10.57
  -6  -3   0  372.11   10.60
  -6  -3   0  372.68   10.59
  -6  -3   0  371.79   10.63
   6   3   0  375.63   10.09
   6   3   0  376.38    9.62
   6   3   0  400.43   10.61
   6   3   0  381.28   10.66
   6   3   0  378.52   10.52
   6   3   0  382.05   10.57
   6   3   0  378.50   10.30
  -6  -4   0   16.11    0.79
  -6  -4   0   14.74    0.58
  -6  -4   0   14.62    0.60
   6   4   0   14.08    0.67
   6   4   0   15.27    0.68
   6   4   0   15.49    0.76
   6   4   0   14.45    0.71
   6   4   0   14.75    0.49
  -6  -5   0  363.14   10.27
  -6  -5   0  361.86   10.11
  -6  -5   0  372.76   10.47
  -6  -5   0  363.04   10.31
   6   5   0  371.00   10.39
   6   5   0  363.01   10.15
   6   5   0  369.20    9.80
   6   5   0  374.17   10.27
  -6  -6   0   54.16    1.89
  -6  -6   0   50.41    1.60
  -6  -6   0   49.26    1.63
   6   6   0   51.65    1.67
   6   6   0   52.53    1.93
   6   6   0   49.67    1.88
  -6  -7   0    2.96    0.28
  -6  -7   0    3.22    0.47
  -6  -7   0    3.02    0.33
  -6  -7   0    3.84    0.49
   6   7   0    3.21    0.30
   6   7   0    3.18    0.48
   6   7   0    2.59    0.46
  -6  -8   0   34.74    1.59
  -6  -8   0   37.69    1.29
  -6  -8   0   39.10    1.65
  -6  -8   0   38.34    1.35
   6   8   0   37.11    1.65
   6   8   0   36.28    1.24
  -6  -9   0    0.40    0.16
  -6  -9   0    0.16    0.26
  -6  -9   0    0.56    0.20
  -6  -9   0    0.14    0.29
   6   9   0    0.57    0.30
  -6 -10   0    6.38    0.79
  -6 -10   0    7.22    0.57
  -6 -10   0    6.95    0.74
   6  10   0    7.84    0.81
  -6 -11   0   36.36    1.47
  -6 -11   0   35.95    1.77
   6  11   0   37.70    1.91
  -6 -12   0   -0.15    0.36
  -6 -12   0    0.23    0.27
   6  12   0    0.69    0.46
  -6 -13   0   29.38    1.34
  -7  13   0    0.22    0.41
   7 -13   0   -0.25    0.44
  -7  12   0    0.01    0.35
   7 -12   0    0.12    0.40
  -7  11   0    0.03    0.43
  -7  11   0    0.26    0.33
   7 -11   0    0.30    0.43
  -7  10   0   -0.01    0.29
   7 -10   0   -0.14    0.36
  -7   9   0    0.37    0.28
  -7   9   0    0.19    0.24
  -7   9   0    0.02    0.15
   7  -9   0    0.23    0.31
   7  -9   0    0.06    0.17
  -7   8   0    0.06    0.22
  -7   8   0    0.05    0.16
  -7   8   0   -0.18    0.23
   7  -8   0   -0.19    0.25
   7  -8   0    0.05    0.15
  -7   7   0   -0.11    0.22
  -7   7   0    0.05    0.16
  -7   7   0    0.11    0.22
   7  -7   0   -0.20    0.12
   7  -7   0   -0.03    0.27
  -7   6   0    0.16    0.21
  -7   6   0   -0.10    0.18
  -7   6   0    0.09    0.14
   7  -6   0    0.13    0.15
   7  -6   0   -0.11    0.21
  -7   5   0    0.12    0.21
  -7   5   0   -0.10    0.13
  -7   5   0   -0.16    0.17
   7  -5   0    0.03    0.15
   7  -5   0    0.17    0.21
  -7   4   0    0.14    0.20
  -7   4   0   -0.16    0.22
  -7   4   0   -0.14    0.15
   7  -4   0   -0.13    0.15
   7  -4   0   -0.09    0.16
   7  -4   0   -0.09    0.20
  -7   3   0    0.21    0.17
  -7   3   0   -0.08    0.13
  -7   3   0   -0.06    0.17
   7  -3   0    0.04    0.13
   7  -3   0   -0.13    0.12
   7  -3   0   -0.05    0.18
  -7   2   0   -0.23    0.12
  -7   2   0   -0.18    0.13
  -7   2   0    0.00    0.12
  -7   2   0   -0.10    0.12
   7  -2   0   -0.09    0.14
   7  -2   0   -0.10    0.10
   7  -2   0    0.08    0.13
  -7   1   0    0.04    0.12
  -7   1   0    0.04    0.05
  -7   1   0    0.03    0.12
  -7   1   0   -0.10    0.09
  -7   1   0    0.16    0.12
  -7   1   0   -0.05    0.11
   7  -1   0    0.33    0.15
   7  -1   0   -0.04    0.10
   7  -1   0    0.04    0.11
   7  -1   0   -0.06    0.10
  -7   0   0    0.24    0.13
  -7   0   0    0.15    0.09
  -7   0   0    0.03    0.11
  -7   0   0    0.16    0.12
  -7   0   0    0.06    0.11
   7   0   0    0.14    0.11
   7   0   0    0.05    0.06
   7   0   0    0.21    0.13
   7   0   0    0.14    0.11
   7   0   0    0.32    0.15
   7   0   0    0.09    0.11
  -7  -1   0   -0.04    0.09
  -7  -1   0    0.03    0.08
  -7  -1   0    0.09    0.12
  -7  -1   0    0.12    0.12
  -7  -1   0   -0.06    0.08
  -7  -1   0    0.01    0.07
   7   1   0    0.04    0.12
   7   1   0   -0.01    0.07
   7   1   0   -0.04    0.08
   7   1   0   -0.02    0.07
   7   1   0    0.07    0.09
   7   1   0    0.15    0.13
  -7  -2   0    0.02    0.11
  -7  -2   0    0.00    0.03
  -7  -2   0   -0.03    0.09
  -7  -2   0    0.01    0.10
   7   2   0   -0.21    0.09
   7   2   0    0.04    0.09
   7   2   0   -0.01    0.13
   7   2   0    0.02    0.09
   7   2   0   -0.06    0.14
   7   2   0   -0.05    0.09
  -7  -3   0    0.05    0.12
  -7  -3   0    0.06    0.10
  -7  -3   0    0.08    0.10
  -7  -3   0   -0.18    0.11
   7   3   0   -0.13    0.11
   7   3   0    0.00    0.18
   7   3   0    0.15    0.13
   7   3   0    0.07    0.07
   7   3   0    0.11    0.15
   7   3   0    0.11    0.08
   7   3   0   -0.36    0.11
  -7  -4   0    0.06    0.10
  -7  -4   0   -0.03    0.17
  -7  -4   0    0.08    0.11
   7   4   0    0.17    0.07
   7   4   0    0.16    0.17
   7   4   0   -0.28    0.17
   7   4   0   -0.03    0.15
   7   4   0   -0.27    0.14
   7   4   0   -0.12    0.11
  -7  -5   0    0.05    0.16
  -7  -5   0    0.17    0.12
  -7  -5   0    0.14    0.10
   7   5   0    0.13    0.18
   7   5   0   -0.20    0.15
   7   5   0    0.05    0.13
   7   5   0    0.08    0.18
  -7  -6   0   -0.06    0.10
  -7  -6   0   -0.06    0.20
  -7  -6   0    0.17    0.11
   7   6   0    0.07    0.20
   7   6   0    0.19    0.18
   7   6   0   -0.11    0.10
  -7  -7   0    0.12    0.12
  -7  -7   0    0.01    0.23
  -7  -7   0   -0.21    0.11
   7   7   0   -0.08    0.19
   7   7   0   -0.07    0.19
   7   7   0   -0.03    0.11
  -7  -8   0    0.13    0.26
  -7  -8   0   -0.14    0.23
  -7  -8   0   -0.11    0.14
  -7  -8   0   -0.08    0.12
   7   8   0   -0.08    0.22
   7   8   0   -0.01    0.22
   7   8   0    0.05    0.12
  -7  -9   0    0.14    0.27
  -7  -9   0    0.03    0.29
  -7  -9   0   -0.01    0.15
  -7  -9   0    0.05    0.13
   7   9   0    0.20    0.29
  -7 -10   0   -0.19    0.26
  -7 -10   0   -0.05    0.17
  -7 -10   0   -0.13    0.27
   7  10   0   -0.17    0.30
  -7 -11   0    0.00    0.33
  -7 -11   0    0.29    0.22
   7  11   0   -0.13    0.33
  -7 -12   0    0.03    0.23
  -7 -12   0   -0.65    0.36
   7  12   0   -0.46    0.37
  -7 -13   0   -0.12    0.23
  -8  13   0    9.83    1.05
   8 -13   0    7.18    1.11
  -8  12   0    4.92    0.84
   8 -12   0    3.57    0.86
  -8  11   0    3.72    0.89
  -8  11   0    4.66    0.80
   8 -11   0    3.90    0.81
  -8  10   0    8.16    0.84
   8 -10   0    8.47    0.93
  -8   9   0    0.03    0.26
  -8   9   0   -0.17    0.15
  -8   9   0    0.15    0.26
   8  -9   0    0.01    0.31
  -8   8   0   39.27    1.53
  -8   8   0   37.83    1.67
  -8   8   0   37.61    1.77
   8  -8   0   40.68    1.56
   8  -8   0   38.81    1.85
  -8   7   0   31.40    1.39
  -8   7   0   30.20    1.26
  -8   7   0   27.04    1.41
   8  -7   0   31.62    1.57
   8  -7   0   30.52    1.29
  -8   6   0   64.88    2.27
  -8   6   0   69.04    2.37
  -8   6   0   74.16    2.55
  -8   6   0   66.55    1.95
   8  -6   0   66.37    2.30
   8  -6   0   61.85    2.50
  -8   5   0   21.94    1.15
  -8   5   0   23.46    1.09
  -8   5   0   22.65    1.03
   8  -5   0   22.74    1.13
   8  -5   0   24.20    1.21
   8  -5   0   24.72    1.07
  -8   4   0   46.91    1.72
  -8   4   0   46.13    1.83
  -8   4   0   48.30    1.72
   8  -4   0   46.93    1.86
   8  -4   0   48.68    1.74
   8  -4   0   45.97    1.77
  -8   3   0   90.89    2.78
  -8   3   0   77.25    2.56
  -8   3   0   76.98    2.59
   8  -3   0   77.48    2.60
   8  -3   0   79.98    2.74
   8  -3   0   77.72    2.62
  -8   2   0   18.98    0.88
  -8   2   0   20.00    0.64
  -8   2   0   20.09    0.99
  -8   2   0   22.10    0.98
  -8   2   0   18.09    0.89
   8  -2   0   20.34    0.93
   8  -2   0   19.18    0.95
   8  -2   0   19.67    0.91
  -8   1   0   20.45    0.93
  -8   1   0   21.77    0.97
  -8   1   0   20.79    0.94
   8  -1   0   21.45    0.94
   8  -1   0   18.88    0.86
   8  -1   0   20.66    0.93
   8  -1   0   21.21    0.93
  -8   0   0  112.25    3.42
  -8   0   0  109.34    3.18
  -8   0   0  108.22    3.38
  -8   0   0  106.12    3.37
   8   0   0  108.58    3.22
   8   0   0  105.71    3.30
   8   0   0  112.72    3.40
   8   0   0  109.23    3.37
   8   0   0  107.82    3.36
   8   0   0  113.03    3.27
  -8  -1   0   20.04    0.77
  -8  -1   0   21.92    0.89
  -8  -1   0   21.32    0.69
  -8  -1   0   20.64    0.92
  -8  -1   0   20.76    0.88
   8   1   0   21.47    0.82
   8   1   0   20.13    0.88
   8   1   0   20.05    0.92
   8   1   0   21.03    0.77
   8   1   0   20.08    0.90
   8   1   0   20.73    0.92
   8   1   0   20.51    0.85
  -8  -2   0   19.91    0.80
  -8  -2   0   18.08    0.87
  -8  -2   0   19.33    0.83
   8   2   0   19.68    0.79
   8   2   0   20.20    0.76
   8   2   0   21.00    0.88
   8   2   0   20.09    0.91
   8   2   0   19.32    0.88
   8   2   0   20.05    0.86
  -8  -3   0   76.90    2.48
  -8  -3   0   79.07    2.42
  -8  -3   0   76.87    2.36
  -8  -3   0   74.80    2.37
   8   3   0   77.34    2.39
   8   3   0   74.36    2.51
   8   3   0   75.91    2.30
   8   3   0   78.49    2.48
   8   3   0   73.08    2.38
   8   3   0   73.94    2.34
  -8  -4   0   49.28    1.72
  -8  -4   0   48.12    1.55
  -8  -4   0   45.00    1.57
   8   4   0   48.56    1.72
   8   4   0   46.15    1.64
   8   4   0   45.82    1.77
   8   4   0   49.94    1.70
   8   4   0   48.09    1.46
   8   4   0   47.00    1.64
   8   4   0   47.99    1.32
  -8  -5   0   22.25    0.88
  -8  -5   0   23.46    0.85
  -8  -5   0   23.53    1.09
   8   5   0   23.16    0.99
   8   5   0   21.34    1.00
   8   5   0   22.85    1.13
   8   5   0   24.08    1.00
   8   5   0   23.78    1.10
  -8  -6   0   71.05    2.46
  -8  -6   0   68.77    2.06
  -8  -6   0   63.67    2.09
   8   6   0   68.09    2.39
   8   6   0   64.66    2.31
   8   6   0   65.53    2.20
  -8  -7   0   29.62    1.05
  -8  -7   0   29.49    1.09
   8   7   0   32.28    1.19
   8   7   0   29.11    1.40
   8   7   0   27.71    1.32
  -8  -8   0   37.20    1.33
  -8  -8   0   36.19    1.64
  -8  -8   0   37.12    1.27
  -8  -8   0   36.57    1.74
   8   8   0   36.72    1.71
   8   8   0   39.25    1.39
   8   8   0   38.57    1.69
  -8  -9   0    0.01    0.26
  -8  -9   0   -0.38    0.26
  -8  -9   0   -0.02    0.13
  -8  -9   0    0.04    0.15
   8   9   0   -0.25    0.25
  -8 -10   0    7.29    0.53
  -8 -10   0    7.12    0.84
   8  10   0    6.82    0.79
  -8 -11   0    4.96    0.79
  -8 -11   0    3.99    0.46
   8  11   0    2.94    0.70
  -8 -12   0    4.15    0.51
  -8 -12   0    3.56    0.83
   8  12   0    3.30    0.79
  -8 -13   0    6.88    0.60
  -9  12   0    0.31    0.41
   9 -12   0    0.16    0.45
  -9  11   0   -0.32    0.29
  -9  11   0   -0.73    0.37
   9 -11   0    0.26    0.42
  -9  10   0   -0.23    0.29
   9 -10   0   -0.13    0.36
  -9   9   0    0.27    0.26
  -9   9   0    0.06    0.27
  -9   9   0   -0.01    0.17
   9  -9   0   -0.22    0.31
  -9   8   0    0.10    0.28
  -9   8   0   -0.04    0.18
  -9   8   0   -0.16    0.25
   9  -8   0   -0.24    0.17
   9  -8   0    0.49    0.36
  -9   7   0    0.16    0.25
  -9   7   0    0.13    0.19
  -9   7   0    0.05    0.27
   9  -7   0    0.20    0.32
   9  -7   0   -0.07    0.15
  -9   6   0   -0.04    0.15
  -9   6   0   -0.14    0.21
  -9   6   0    0.00    0.08
  -9   6   0    0.08    0.23
   9  -6   0   -0.04    0.23
   9  -6   0   -0.21    0.14
  -9   5   0   -0.09    0.15
  -9   5   0   -0.25    0.18
  -9   5   0    0.01    0.22
   9  -5   0    0.11    0.23
   9  -5   0    0.12    0.17
  -9   4   0   -0.09    0.16
  -9   4   0   -0.27    0.16
  -9   4   0   -0.20    0.15
   9  -4   0    0.01    0.16
   9  -4   0    0.15    0.19
   9  -4   0    0.07    0.21
  -9   3   0   -0.22    0.18
  -9   3   0   -0.26    0.14
  -9   3   0   -0.31    0.13
   9  -3   0   -0.25    0.12
   9  -3   0    0.04    0.15
   9  -3   0    0.13    0.22
  -9   2   0   -0.05    0.14
  -9   2   0    0.05    0.05
  -9   2   0    0.05    0.15
  -9   2   0   -0.20    0.17
   9  -2   0    0.08    0.15
   9  -2   0   -0.09    0.12
   9  -2   0   -0.17    0.14
  -9   1   0    0.01    0.14
  -9   1   0    0.05    0.14
  -9   1   0   -0.05    0.09
  -9   1   0   -0.12    0.13
   9  -1   0   -0.03    0.14
   9  -1   0    0.01    0.13
   9  -1   0   -0.09    0.13
  -9   0   0    0.31    0.16
  -9   0   0   -0.02    0.14
  -9   0   0    0.14    0.15
  -9   0   0   -0.03    0.08
   9   0   0   -0.14    0.13
   9   0   0   -0.09    0.13
   9   0   0    0.02    0.13
   9   0   0   -0.03    0.06
   9   0   0    0.08    0.14
   9   0   0   -0.16    0.12
  -9  -1   0   -0.10    0.12
  -9  -1   0   -0.01    0.09
  -9  -1   0    0.09    0.13
  -9  -1   0    0.06    0.09
  -9  -1   0    0.00    0.12
   9   1   0    0.00    0.12
   9   1   0   -0.27    0.12
   9   1   0   -0.04    0.11
   9   1   0   -0.03    0.08
   9   1   0    0.01    0.11
   9   1   0   -0.01    0.15
  -9  -2   0    0.01    0.07
  -9  -2   0   -0.12    0.11
  -9  -2   0   -0.01    0.14
  -9  -2   0   -0.06    0.12
   9   2   0   -0.17    0.11
   9   2   0    0.03    0.11
   9   2   0   -0.28    0.18
   9   2   0   -0.18    0.13
   9   2   0    0.01    0.11
   9   2   0   -0.13    0.09
  -9  -3   0    0.10    0.12
  -9  -3   0    0.14    0.17
  -9  -3   0    0.01    0.13
  -9  -3   0    0.03    0.13
   9   3   0   -0.01    0.16
   9   3   0    0.03    0.10
   9   3   0   -0.25    0.15
   9   3   0   -0.11    0.11
   9   3   0   -0.09    0.13
   9   3   0   -0.01    0.19
  -9  -4   0   -0.07    0.14
  -9  -4   0    0.11    0.14
  -9  -4   0    0.02    0.11
   9   4   0   -0.11    0.13
   9   4   0   -0.03    0.13
   9   4   0   -0.10    0.14
   9   4   0    0.13    0.17
   9   4   0   -0.21    0.16
   9   4   0   -0.04    0.08
   9   4   0   -0.01    0.07
  -9  -5   0    0.17    0.12
  -9  -5   0   -0.07    0.12
  -9  -5   0   -0.12    0.16
   9   5   0   -0.33    0.16
   9   5   0   -0.23    0.14
   9   5   0   -0.04    0.15
   9   5   0   -0.19    0.12
   9   5   0   -0.05    0.20
   9   5   0    0.09    0.08
  -9  -6   0   -0.01    0.11
  -9  -6   0    0.02    0.13
  -9  -6   0    0.38    0.24
   9   6   0   -0.05    0.13
   9   6   0   -0.14    0.22
   9   6   0    0.13    0.19
   9   6   0   -0.07    0.20
  -9  -7   0   -0.03    0.12
  -9  -7   0    0.07    0.14
   9   7   0    0.29    0.28
   9   7   0   -0.10    0.22
   9   7   0    0.11    0.14
   9   7   0   -0.03    0.19
  -9  -8   0    0.09    0.13
  -9  -8   0   -0.15    0.13
  -9  -8   0   -0.06    0.24
   9   8   0   -0.11    0.13
   9   8   0   -0.04    0.21
   9   8   0   -0.14    0.23
  -9  -9   0   -0.12    0.23
  -9  -9   0    0.15    0.16
  -9  -9   0    0.03    0.13
   9   9   0   -0.08    0.27
  -9 -10   0    0.19    0.17
  -9 -10   0   -0.10    0.27
   9  10   0   -0.06    0.29
  -9 -11   0    0.24    0.33
  -9 -11   0    0.00    0.17
   9  11   0   -0.18    0.34
  -9 -12   0    0.14    0.39
  -9 -12   0    0.17    0.20
   9  12   0   -0.37    0.33
 -10  12   0   23.53    1.52
  10 -12   0   22.56    1.65
 -10  11   0    3.07    0.74
  10 -11   0    2.20    0.65
 -10  10   0    0.74    0.39
  10 -10   0   -0.25    0.34
 -10   9   0    0.83    0.39
 -10   9   0    1.13    0.29
 -10   9   0    0.17    0.29
  10  -9   0    1.18    0.45
 -10   8   0   17.50    1.00
 -10   8   0   19.71    1.15
 -10   8   0   17.41    1.17
  10  -8   0   18.52    1.30
 -10   7   0   30.38    1.43
 -10   7   0   29.30    1.54
 -10   7   0   31.64    1.39
  10  -7   0   30.76    1.40
  10  -7   0   32.43    1.64
 -10   6   0    0.78    0.26
 -10   6   0    0.83    0.19
 -10   6   0    1.08    0.34
 -10   6   0    0.78    0.27
  10  -6   0    0.54    0.32
  10  -6   0    0.68    0.26
 -10   5   0   -0.02    0.18
 -10   5   0    0.20    0.26
 -10   5   0    0.14    0.20
  10  -5   0    0.18    0.27
  10  -5   0    0.21    0.18
 -10   4   0  122.66    3.91
 -10   4   0  129.92    4.15
 -10   4   0  123.74    3.98
  10  -4   0  127.45    4.01
  10  -4   0  126.03    4.17
 -10   3   0   24.56    1.15
 -10   3   0   25.46    1.15
 -10   3   0   25.31    0.78
 -10   3   0   22.07    1.17
  10  -3   0   23.90    1.20
  10  -3   0   25.07    1.18
  10  -3   0   26.07    1.18
 -10   2   0    1.99    0.38
 -10   2   0    1.85    0.36
 -10   2   0    1.39    0.33
  10  -2   0    1.42    0.31
  10  -2   0    1.22    0.34
  10  -2   0    1.47    0.36
 -10   1   0   37.32    1.55
 -10   1   0   38.30    1.55
 -10   1   0   41.51    1.62
 -10   1   0   40.45    1.36
  10  -1   0   38.41    1.55
  10  -1   0   41.27    1.58
  10  -1   0   37.89    1.52
 -10   0   0   49.74    1.87
 -10   0   0   50.75    1.64
 -10   0   0   54.63    1.92
 -10   0   0   50.28    1.86
  10   0   0   52.01    1.84
  10   0   0   48.78    1.84
  10   0   0   48.41    1.77
  10   0   0   49.94    1.82
  10   0   0   49.87    1.87
 -10  -1   0   39.99    1.51
 -10  -1   0   37.45    1.48
 -10  -1   0   39.28    1.19
 -10  -1   0   37.33    1.52
 -10  -1   0   37.24    1.31
  10   1   0   40.57    1.53
  10   1   0   40.01    1.55
  10   1   0   39.83    1.37
  10   1   0   36.96    1.49
  10   1   0   38.85    1.45
  10   1   0   36.38    1.45
 -10  -2   0    1.23    0.28
 -10  -2   0    1.49    0.33
 -10  -2   0    1.76    0.31
 -10  -2   0    1.25    0.15
 -10  -2   0    0.75    0.19
  10   2   0    1.90    0.39
  10   2   0    2.73    0.37
  10   2   0    1.00    0.24
  10   2   0    1.42    0.22
  10   2   0    1.90    0.27
  10   2   0    1.05    0.26
 -10  -3   0   25.08    1.16
 -10  -3   0   26.00    1.08
 -10  -3   0   26.99    1.07
  10   3   0   27.01    1.17
  10   3   0   25.62    0.99
  10   3   0   26.16    1.11
  10   3   0   26.32    1.00
  10   3   0   25.16    1.18
  10   3   0   26.47    1.15
 -10  -4   0  123.55    3.68
 -10  -4   0  115.67    3.69
 -10  -4   0  124.47    3.77
  10   4   0  121.93    3.69
  10   4   0  118.62    3.72
  10   4   0  128.10    3.85
  10   4   0  118.71    3.89
  10   4   0  119.49    3.57
  10   4   0  123.29    3.67
 -10  -5   0    0.20    0.19
 -10  -5   0    0.09    0.16
 -10  -5   0    0.05    0.13
  10   5   0    0.22    0.19
  10   5   0    0.31    0.09
  10   5   0   -0.02    0.22
  10   5   0   -0.08    0.15
  10   5   0   -0.07    0.16
 -10  -6   0    0.72    0.20
 -10  -6   0    0.89    0.24
 -10  -6   0    1.00    0.31
  10   6   0    1.06    0.17
  10   6   0    0.61    0.24
  10   6   0    0.84    0.23
  10   6   0    0.80    0.31
  10   6   0    0.59    0.27
 -10  -7   0   31.58    1.15
 -10  -7   0   31.26    1.20
  10   7   0   31.74    1.01
  10   7   0   31.31    1.57
  10   7   0   34.12    1.36
  10   7   0   32.71    1.44
  10   7   0   35.02    1.56
 -10  -8   0   17.85    1.22
 -10  -8   0   16.71    0.73
 -10  -8   0   17.85    0.79
  10   8   0   17.30    0.93
  10   8   0   16.64    1.01
  10   8   0   17.55    1.20
  10   8   0   17.48    1.12
 -10  -9   0    0.85    0.43
 -10  -9   0    1.49    0.32
  10   9   0    1.03    0.35
  10   9   0    0.66    0.43
 -10 -10   0    0.49    0.19
 -10 -10   0    0.36    0.34
  10  10   0    0.43    0.35
 -10 -11   0    2.05    0.36
 -10 -11   0    2.88    0.72
  10  11   0    2.10    0.53
 -10 -12   0   24.33    1.62
 -10 -12   0   23.01    0.93
  10  12   0   23.22    1.52
 -11  12   0   -0.24    0.38
  11 -12   0    0.67    0.52
 -11  11   0   -0.79    0.26
  11 -11   0    0.63    0.53
 -11  10   0    0.01    0.31
  11 -10   0    0.09    0.41
 -11   9   0   -0.09    0.30
 -11   9   0   -0.12    0.19
 -11   9   0   -0.01    0.27
  11  -9   0    0.12    0.40
 -11   8   0   -0.05    0.20
 -11   8   0    0.25    0.35
 -11   8   0    0.00    0.27
  11  -8   0   -0.05    0.34
 -11   7   0    0.11    0.28
 -11   7   0   -0.05    0.28
 -11   7   0    0.09    0.22
  11  -7   0   -0.08    0.29
 -11   6   0   -0.33    0.20
 -11   6   0    0.08    0.21
 -11   6   0    0.18    0.11
 -11   6   0   -0.21    0.18
  11  -6   0   -0.21    0.23
 -11   5   0   -0.21    0.21
 -11   5   0   -0.06    0.20
 -11   5   0   -0.09    0.19
  11  -5   0    0.02    0.24
 -11   4   0   -0.19    0.23
 -11   4   0   -0.02    0.21
 -11   4   0   -0.17    0.18
  11  -4   0    0.10    0.25
 -11   3   0   -0.04    0.17
 -11   3   0   -0.17    0.21
 -11   3   0    0.33    0.26
  11  -3   0   -0.20    0.14
  11  -3   0   -0.30    0.18
 -11   2   0    0.01    0.17
 -11   2   0   -0.02    0.18
  11  -2   0    0.13    0.16
  11  -2   0   -0.21    0.15
 -11   1   0   -0.06    0.10
 -11   1   0    0.10    0.21
 -11   1   0   -0.02    0.16
 -11   1   0   -0.11    0.15
  11  -1   0   -0.01    0.16
  11  -1   0    0.02    0.15
 -11   0   0    0.64    0.24
 -11   0   0    0.42    0.21
 -11   0   0    0.27    0.22
 -11   0   0    0.17    0.12
  11   0   0    0.38    0.21
  11   0   0    0.10    0.17
  11   0   0    0.25    0.18
 -11  -1   0    0.12    0.12
 -11  -1   0    0.03    0.15
 -11  -1   0    0.00    0.16
 -11  -1   0   -0.06    0.16
 -11  -1   0    0.18    0.11
  11   1   0   -0.01    0.14
  11   1   0   -0.09    0.14
  11   1   0   -0.08    0.09
  11   1   0   -0.12    0.15
  11   1   0    0.34    0.23
 -11  -2   0   -0.01    0.08
 -11  -2   0   -0.14    0.15
 -11  -2   0   -0.11    0.15
 -11  -2   0   -0.14    0.13
 -11  -2   0   -0.02    0.13
  11   2   0    0.01    0.13
  11   2   0    0.34    0.22
  11   2   0   -0.19    0.15
  11   2   0   -0.11    0.11
  11   2   0   -0.22    0.13
 -11  -3   0    0.02    0.19
 -11  -3   0   -0.11    0.13
 -11  -3   0   -0.02    0.15
  11   3   0   -0.05    0.22
  11   3   0    0.14    0.12
  11   3   0   -0.14    0.17
  11   3   0    0.05    0.17
  11   3   0   -0.26    0.14
  11   3   0   -0.20    0.12
 -11  -4   0   -0.07    0.15
 -11  -4   0   -0.01    0.16
 -11  -4   0   -0.10    0.17
  11   4   0   -0.06    0.22
  11   4   0    0.12    0.18
  11   4   0   -0.21    0.17
  11   4   0    0.20    0.17
  11   4   0    0.04    0.11
 -11  -5   0    0.24    0.16
 -11  -5   0   -0.25    0.17
 -11  -5   0    0.25    0.17
  11   5   0   -0.02    0.23
  11   5   0   -0.08    0.14
  11   5   0    0.02    0.17
  11   5   0   -0.24    0.14
 -11  -6   0   -0.06    0.14
 -11  -6   0    0.08    0.14
 -11  -6   0   -0.10    0.20
  11   6   0   -0.04    0.17
  11   6   0   -0.02    0.08
  11   6   0    0.02    0.19
  11   6   0   -0.36    0.20
  11   6   0    0.01    0.22
 -11  -7   0   -0.09    0.15
 -11  -7   0   -0.15    0.13
  11   7   0   -0.10    0.29
  11   7   0   -0.19    0.19
  11   7   0    0.12    0.23
  11   7   0    0.02    0.10
  11   7   0   -0.25    0.15
 -11  -8   0    0.07    0.13
 -11  -8   0    0.03    0.16
 -11  -8   0    0.17    0.31
  11   8   0    0.11    0.32
  11   8   0    0.03    0.24
 -11  -9   0    0.51    0.39
 -11  -9   0    0.02    0.16
  11   9   0   -0.25    0.21
  11   9   0   -0.49    0.29
 -11 -10   0    0.14    0.16
 -11 -10   0    0.40    0.38
  11  10   0   -0.12    0.31
  11  10   0   -0.43    0.30
 -11 -11   0   -0.21    0.35
 -11 -11   0   -0.02    0.16
  11  11   0   -0.08    0.33
  11  11   0    0.07    0.43
 -11 -12   0    0.44    0.46
  11  12   0   -0.31    0.43
 -12  11   0   17.81    1.31
  12 -11   0   18.05    1.56
 -12  10   0    0.23    0.38
  12 -10   0    0.17    0.47
 -12   9   0   -0.03    0.31
 -12   9   0    0.05    0.22
 -12   9   0    0.07    0.27
  12  -9   0   -0.07    0.37
 -12   8   0    0.42    0.32
 -12   8   0    0.04    0.24
 -12   8   0   -0.11    0.30
  12  -8   0   -0.16    0.38
 -12   7   0    0.62    0.29
 -12   7   0    2.19    0.51
 -12   7   0    1.17    0.46
  12  -7   0    0.27    0.34
 -12   6   0    0.02    0.21
 -12   6   0    0.11    0.31
 -12   6   0    0.08    0.15
 -12   6   0    0.17    0.24
  12  -6   0    0.01    0.27
 -12   5   0    8.72    0.76
 -12   5   0    8.35    0.75
 -12   5   0    8.84    0.82
  12  -5   0    8.93    0.83
 -12   4   0   -0.13    0.26
 -12   4   0    0.69    0.29
 -12   4   0    0.37    0.28
  12  -4   0    0.83    0.35
 -12   3   0   45.39    1.80
 -12   3   0   45.46    1.90
 -12   3   0   42.26    1.80
  12  -3   0   44.43    1.88
 -12   2   0    5.82    0.60
 -12   2   0    5.67    0.60
  12  -2   0    4.68    0.59
 -12   1   0    0.76    0.27
 -12   1   0    1.49    0.27
 -12   1   0    0.60    0.25
  12  -1   0    0.51    0.24
 -12   0   0    0.39    0.25
 -12   0   0    0.42    0.15
 -12   0   0    0.61    0.26
 -12   0   0    0.60    0.25
  12   0   0    0.68    0.24
  12   0   0    0.63    0.26
 -12  -1   0    0.90    0.20
 -12  -1   0    1.12    0.31
 -12  -1   0    1.27    0.34
 -12  -1   0    0.87    0.31
 -12  -1   0    1.09    0.24
  12   1   0    0.86    0.23
  12   1   0    1.61    0.38
 -12  -2   0    5.39    0.31
 -12  -2   0    5.66    0.44
 -12  -2   0    4.41    0.50
 -12  -2   0    4.83    0.56
 -12  -2   0    4.45    0.50
  12   2   0    5.76    0.41
  12   2   0    4.13    0.53
  12   2   0    4.94    0.47
 -12  -3   0   41.95    1.75
 -12  -3   0   44.04    1.67
 -12  -3   0   43.99    1.60
  12   3   0   43.98    1.53
  12   3   0   42.29    1.77
  12   3   0   43.95    1.57
  12   3   0   43.57    1.66
 -12  -4   0    0.76    0.25
 -12  -4   0    0.48    0.22
 -12  -4   0    0.36    0.21
  12   4   0    0.79    0.31
  12   4   0    0.55    0.22
  12   4   0    0.37    0.16
  12   4   0    0.38    0.18
 -12  -5   0    7.41    0.58
 -12  -5   0    7.65    0.55
 -12  -5   0    7.31    0.65
  12   5   0    8.92    0.77
  12   5   0    8.88    0.71
  12   5   0    8.03    0.57
 -12  -6   0    0.10    0.18
 -12  -6   0    0.04    0.16
 -12  -6   0    0.33    0.27
  12   6   0   -0.22    0.25
  12   6   0    0.05    0.23
  12   6   0    0.40    0.23
 -12  -7   0    1.38    0.31
 -12  -7   0    0.93    0.25
  12   7   0    0.93    0.41
  12   7   0    1.46    0.39
  12   7   0    0.61    0.33
 -12  -8   0   -0.26    0.35
 -12  -8   0    0.21    0.18
  12   8   0   -0.09    0.29
  12   8   0   -0.21    0.21
 -12  -9   0   -0.04    0.33
 -12  -9   0    0.20    0.18
  12   9   0    0.58    0.32
  12   9   0    0.82    0.46
 -12 -10   0    0.46    0.18
 -12 -10   0    0.17    0.40
  12  10   0    0.72    0.45
  12  10   0   -0.10    0.29
 -12 -11   0   17.37    1.46
 -12 -11   0   15.69    0.68
  12  11   0   17.24    1.26
  12  11   0   13.87    1.39
 -13  11   0    0.10    0.37
  13 -11   0    0.08    0.48
 -13  10   0   -0.21    0.33
  13 -10   0    0.16    0.44
 -13   9   0   -0.01    0.36
 -13   9   0    0.30    0.36
 -13   9   0   -0.24    0.23
  13  -9   0   -0.02    0.36
 -13   8   0   -0.23    0.29
 -13   8   0    0.00    0.24
 -13   8   0   -0.12    0.38
  13  -8   0    0.04    0.38
 -13   7   0    0.17    0.31
 -13   7   0   -0.60    0.26
 -13   7   0   -0.16    0.21
  13  -7   0   -0.51    0.34
 -13   6   0    0.46    0.28
 -13   6   0    0.02    0.15
 -13   6   0    0.16    0.27
 -13   6   0    0.30    0.33
  13  -6   0    0.12    0.35
 -13   5   0   -0.41    0.23
 -13   5   0    0.11    0.22
 -13   5   0    0.18    0.30
  13  -5   0    0.23    0.31
 -13   4   0   -0.33    0.21
 -13   4   0    0.03    0.25
 -13   4   0    0.02    0.26
  13  -4   0   -0.18    0.28
 -13   3   0   -0.09    0.26
 -13   3   0   -0.05    0.23
 -13   3   0   -0.09    0.21
  13  -3   0   -0.36    0.21
 -13   2   0   -0.46    0.24
 -13   2   0   -0.15    0.20
 -13   2   0    0.12    0.16
  13  -2   0   -0.21    0.22
 -13   1   0    0.01    0.21
 -13   1   0    0.06    0.23
 -13   1   0   -0.08    0.13
  13  -1   0    0.01    0.21
 -13   0   0    0.43    0.16
 -13   0   0    0.15    0.25
 -13   0   0   -0.24    0.22
 -13   0   0    0.16    0.26
  13   0   0   -0.05    0.20
  13   0   0   -0.22    0.20
 -13  -1   0    0.06    0.14
 -13  -1   0   -0.14    0.11
 -13  -1   0   -0.18    0.21
 -13  -1   0   -0.42    0.20
 -13  -1   0   -0.22    0.20
  13   1   0   -0.23    0.16
  13   1   0    0.07    0.26
 -13  -2   0   -0.06    0.10
 -13  -2   0    0.14    0.17
 -13  -2   0   -0.20    0.20
 -13  -2   0    0.16    0.21
 -13  -2   0   -0.09    0.21
  13   2   0   -0.16    0.15
  13   2   0   -0.19    0.21
 -13  -3   0    0.13    0.22
 -13  -3   0    0.04    0.18
 -13  -3   0   -0.06    0.21
  13   3   0    0.21    0.17
  13   3   0   -0.06    0.19
  13   3   0   -0.26    0.12
  13   3   0    0.03    0.23
 -13  -4   0   -0.11    0.19
 -13  -4   0    0.05    0.19
 -13  -4   0   -0.29    0.18
  13   4   0    0.12    0.18
  13   4   0   -0.30    0.16
  13   4   0    0.07    0.25
 -13  -5   0   -0.03    0.19
 -13  -5   0   -0.26    0.16
 -13  -5   0    0.04    0.22
  13   5   0   -0.09    0.17
  13   5   0   -0.06    0.27
  13   5   0    0.12    0.23
 -13  -6   0   -0.04    0.19
 -13  -6   0   -0.23    0.21
  13   6   0   -0.01    0.24
  13   6   0    0.03    0.19
  13   6   0    0.04    0.30
 -13  -7   0    0.08    0.19
  13   7   0   -0.23    0.24
  13   7   0    0.24    0.25
  13   7   0    0.26    0.38
 -13  -8   0   -0.36    0.36
 -13  -8   0    0.03    0.18
  13   8   0    0.22    0.36
  13   8   0   -0.12    0.25
 -13  -9   0   -0.03    0.18
 -13  -9   0   -0.19    0.38
  13   9   0    0.13    0.38
  13   9   0   -0.26    0.25
 -13 -10   0    0.23    0.47
 -13 -10   0    0.06    0.17
  13  10   0    0.34    0.45
  13  10   0   -0.17    0.30
 -13 -11   0   -0.45    0.45
  13  11   0    0.38    0.53
  13  11   0    0.56    0.43
 -14  10   0    0.88    0.46
  14 -10   0    1.03    0.55
 -14   9   0    1.56    0.52
 -14   9   0    1.40    0.41
 -14   9   0    1.64    0.51
  14  -9   0    0.93    0.53
 -14   8   0    2.10    0.59
 -14   8   0    1.39    0.52
 -14   8   0    1.49    0.42
  14  -8   0    1.43    0.55
 -14   7   0    6.74    0.81
 -14   7   0    6.80    0.79
 -14   7   0    6.92    0.94
  14  -7   0    6.39    0.89
 -14   6   0    2.22    0.59
 -14   6   0    2.18    0.57
 -14   6   0    1.23    0.47
 -14   6   0    1.10    0.33
  14  -6   0    0.97    0.43
 -14   5   0   67.49    2.52
 -14   5   0   61.94    2.51
 -14   5   0   65.17    2.70
  14  -5   0   65.36    2.67
 -14   4   0    2.42    0.54
 -14   4   0    2.68    0.61
 -14   4   0    3.31    0.67
  14  -4   0    2.13    0.57
 -14   3   0   82.44    3.16
 -14   3   0   85.71    3.09
  14  -3   0   86.77    3.15
 -14   2   0    0.30    0.34
 -14   2   0    0.58    0.31
 -14   2   0    0.73    0.23
  14  -2   0    0.55    0.29
 -14   1   0   30.94    1.20
 -14   1   0   27.24    1.45
 -14   1   0   30.94    1.52
  14  -1   0   31.82    1.47
 -14   0   0   28.90    1.15
 -14   0   0   28.84    1.10
 -14   0   0   29.12    1.45
 -14   0   0   31.37    1.51
 -14   0   0   28.26    1.44
  14   0   0   29.70    1.44
  14   0   0   26.56    1.33
 -14  -1   0   29.84    1.06
 -14  -1   0   31.34    1.52
 -14  -1   0   28.33    1.16
 -14  -1   0   30.74    1.46
 -14  -1   0   29.00    1.42
  14   1   0   28.85    1.34
  14   1   0   27.70    1.42
  14   1   0   30.83    1.18
 -14  -2   0    0.44    0.15
 -14  -2   0    0.20    0.30
 -14  -2   0   -0.12    0.24
 -14  -2   0    0.05    0.23
 -14  -2   0    0.46    0.21
  14   2   0   -0.03    0.26
  14   2   0    0.19    0.21
 -14  -3   0   83.79    2.87
 -14  -3   0   85.24    2.71
 -14  -3   0   81.70    2.96
  14   3   0   81.17    2.61
  14   3   0   80.43    2.76
  14   3   0   77.67    2.92
 -14  -4   0    2.21    0.43
 -14  -4   0    2.96    0.49
  14   4   0    2.73    0.38
  14   4   0    2.46    0.48
  14   4   0    3.36    0.66
 -14  -5   0   65.12    2.36
 -14  -5   0   62.51    2.28
  14   5   0   65.45    2.20
  14   5   0   63.33    2.38
  14   5   0   59.73    2.46
 -14  -6   0    1.16    0.29
  14   6   0    1.40    0.39
  14   6   0    1.32    0.38
  14   6   0    1.22    0.44
 -14  -7   0    5.80    0.89
 -14  -7   0    6.56    0.59
  14   7   0    5.43    0.78
  14   7   0    6.95    0.64
 -14  -8   0    1.84    0.59
 -14  -8   0    2.20    0.45
  14   8   0    2.12    0.51
  14   8   0    3.36    0.79
 -14  -9   0    2.77    0.79
 -14  -9   0    1.96    0.41
  14   9   0    1.86    0.45
  14   9   0    3.57    0.77
 -14 -10   0    0.59    0.55
 -14 -10   0    0.84    0.23
  14  10   0    1.59    0.58
  14  10   0    0.72    0.38
 -15  10   0   -0.46    0.36
  15 -10   0    0.88    0.55
 -15   9   0   -0.39    0.35
 -15   9   0   -0.10    0.29
  15  -9   0   -0.64    0.34
 -15   8   0   -0.31    0.38
 -15   8   0   -0.28    0.28
 -15   8   0    0.10    0.30
  15  -8   0   -0.50    0.36
 -15   7   0   -0.43    0.33
 -15   7   0   -0.46    0.22
 -15   7   0   -0.10    0.31
  15  -7   0   -0.41    0.35
 -15   6   0   -0.25    0.21
 -15   6   0   -0.05    0.28
 -15   6   0    0.12    0.35
  15  -6   0    0.27    0.37
 -15   5   0    0.32    0.27
 -15   5   0    0.19    0.34
 -15   5   0    0.41    0.30
  15  -5   0    0.29    0.35
 -15   4   0    0.23    0.32
 -15   4   0    0.21    0.27
  15  -4   0   -0.07    0.26
 -15   3   0   -0.23    0.17
 -15   3   0    0.17    0.26
 -15   3   0    0.26    0.31
  15  -3   0   -0.07    0.28
 -15   2   0    0.23    0.29
 -15   2   0    0.09    0.17
 -15   2   0   -0.13    0.22
  15  -2   0   -0.11    0.25
 -15   1   0    0.01    0.24
 -15   1   0   -0.08    0.26
 -15   1   0   -0.06    0.14
  15  -1   0   -0.09    0.20
 -15   0   0   -0.04    0.17
 -15   0   0   -0.07    0.15
 -15   0   0   -0.13    0.26
 -15   0   0   -0.22    0.25
  15   0   0   -0.10    0.22
  15   0   0   -0.39    0.30
 -15  -1   0   -0.29    0.14
 -15  -1   0    0.13    0.15
 -15  -1   0   -0.44    0.22
 -15  -1   0   -0.41    0.26
  15   1   0    0.18    0.30
  15   1   0   -0.28    0.21
 -15  -2   0    0.02    0.25
 -15  -2   0   -0.55    0.21
 -15  -2   0    0.06    0.12
 -15  -2   0   -0.08    0.17
  15   2   0   -0.26    0.29
 -15  -3   0   -0.06    0.23
 -15  -3   0   -0.34    0.16
 -15  -3   0    0.19    0.24
  15   3   0   -0.32    0.18
  15   3   0    0.04    0.29
 -15  -4   0   -0.43    0.16
 -15  -4   0    0.00    0.21
  15   4   0   -0.03    0.22
  15   4   0   -0.01    0.17
  15   4   0    0.16    0.31
 -15  -5   0   -0.02    0.25
 -15  -5   0   -0.16    0.21
  15   5   0   -0.23    0.20
  15   5   0   -0.08    0.34
  15   5   0   -0.06    0.19
 -15  -6   0   -0.12    0.20
  15   6   0    0.15    0.22
  15   6   0    0.23    0.34
  15   6   0    0.02    0.24
 -15  -7   0   -0.25    0.19
 -15  -7   0   -0.63    0.32
  15   7   0    0.05    0.36
  15   7   0   -0.09    0.23
 -15  -8   0   -0.12    0.21
 -15  -8   0   -0.64    0.38
  15   8   0    0.40    0.40
  15   8   0   -0.38    0.24
 -15  -9   0   -0.21    0.42
 -15  -9   0   -0.08    0.20
  15   9   0    0.19    0.43
 -15 -10   0    0.12    0.18
 -15 -10   0    0.05    0.45
  15  10   0   -0.41    0.43
 -16   9   0    0.19    0.32
 -16   9   0    0.37    0.41
  16  -9   0   -0.38    0.44
 -16   8   0   12.00    1.31
 -16   8   0   10.76    1.02
 -16   8   0   13.56    1.09
  16  -8   0   12.48    1.25
 -16   7   0   -0.11    0.31
 -16   7   0    0.16    0.47
 -16   7   0    0.05    0.34
  16  -7   0    0.00    0.42
 -16   6   0    0.74    0.35
 -16   6   0    0.84    0.38
 -16   6   0    0.45    0.42
  16  -6   0    0.54    0.46
 -16   5   0    4.71    0.57
 -16   5   0    6.49    0.86
 -16   5   0    6.05    0.79
 -16   5   0    4.20    0.73
  16  -5   0    4.99    0.77
 -16   4   0    0.75    0.33
 -16   4   0    0.87    0.40
  16  -4   0    0.40    0.33
 -16   3   0    8.03    0.83
 -16   3   0    8.31    0.87
  16  -3   0    8.50    0.83
 -16   2   0    6.55    0.75
 -16   2   0    6.65    0.78
 -16   2   0    6.10    0.55
  16  -2   0    5.05    0.67
 -16   1   0    0.39    0.20
 -16   1   0    0.37    0.35
 -16   1   0    0.30    0.31
  16  -1   0    0.28    0.29
 -16   0   0    6.32    0.81
 -16   0   0    6.76    0.81
 -16   0   0    6.79    0.53
 -16   0   0    8.42    0.56
  16   0   0    5.72    0.74
  16   0   0    6.81    0.73
 -16  -1   0    0.12    0.32
 -16  -1   0    0.45    0.19
 -16  -1   0   -0.08    0.28
 -16  -1   0    0.52    0.22
  16   1   0    0.91    0.39
 -16  -2   0    6.43    0.77
 -16  -2   0    5.58    0.53
 -16  -2   0    5.75    0.72
  16   2   0    5.88    0.73
 -16  -3   0    7.98    0.74
  16   3   0    8.58    0.84
  16   3   0    9.24    0.76
 -16  -4   0    0.64    0.30
  16   4   0    0.29    0.21
  16   4   0    0.43    0.34
  16   4   0    0.85    0.32
 -16  -5   0    4.69    0.59
  16   5   0    4.67    0.50
  16   5   0    4.24    0.61
  16   5   0    4.50    0.74
 -16  -6   0    0.98    0.31
  16   6   0    0.19    0.38
  16   6   0    0.79    0.27
 -16  -7   0   -0.18    0.41
 -16  -7   0    0.38    0.26
  16   7   0    0.33    0.45
 -16  -8   0   11.98    0.81
 -16  -8   0    8.91    1.27
  16   8   0   11.05    1.12
 -16  -9   0    0.01    0.22
 -16  -9   0   -0.32    0.41
  16   9   0    0.05    0.48
 -17   9   0    0.62    0.44
  17  -9   0   -0.28    0.43
 -17   8   0   -0.19    0.36
 -17   8   0   -0.26    0.33
 -17   8   0   -0.03    0.50
  17  -8   0    0.03    0.45
 -17   7   0   -0.43    0.33
 -17   7   0    0.20    0.52
 -17   7   0    0.05    0.36
  17  -7   0    0.01    0.45
 -17   6   0    0.10    0.33
 -17   6   0   -0.05    0.36
 -17   6   0   -0.76    0.28
  17  -6   0   -0.20    0.35
 -17   5   0    0.40    0.24
 -17   5   0   -0.23    0.34
 -17   5   0   -0.31    0.30
  17  -5   0   -0.30    0.29
 -17   4   0    0.21    0.31
 -17   4   0   -0.13    0.30
  17  -4   0   -0.25    0.28
 -17   3   0   -0.42    0.22
 -17   3   0    0.29    0.39
  17  -3   0    0.42    0.34
 -17   2   0   -0.28    0.25
 -17   2   0    0.04    0.32
  17  -2   0   -0.03    0.24
 -17   1   0   -0.40    0.24
 -17   1   0   -0.29    0.30
 -17   0   0   -0.07    0.33
 -17   0   0   -0.08    0.29
  17   0   0   -0.42    0.26
 -17  -1   0   -0.29    0.28
 -17  -1   0   -0.27    0.27
  17   1   0    0.22    0.33
 -17  -2   0   -0.18    0.28
 -17  -2   0   -0.35    0.24
  17   2   0   -0.22    0.30
 -17  -3   0    0.31    0.29
  17   3   0   -0.08    0.33
  17   3   0    0.02    0.22
 -17  -4   0   -0.13    0.27
  17   4   0    0.05    0.38
  17   4   0    0.31    0.27
 -17  -5   0   -0.07    0.25
  17   5   0   -0.08    0.23
  17   5   0   -0.04    0.37
 -17  -6   0   -0.18    0.36
 -17  -6   0   -0.26    0.22
  17   6   0   -0.32    0.35
 -17  -7   0   -0.37    0.23
 -17  -7   0   -0.39    0.40
  17   7   0    0.04    0.41
 -17  -8   0    0.26    0.27
 -17  -8   0   -0.12    0.48
  17   8   0    0.05    0.45
 -17  -9   0    0.05    0.24
 -17  -9   0    0.59    0.52
  17   9   0   -0.11    0.45
 -18   8   0   12.29    1.38
 -18   8   0   16.82    1.33
  18  -8   0   17.27    1.58
 -18   7   0    0.41    0.38
 -18   7   0    0.29    0.44
 -18   7   0    0.58    0.53
  18  -7   0    0.44    0.54
 -18   6   0    1.69    0.60
 -18   6   0    1.10    0.48
  18  -6   0    1.87    0.61
 -18   5   0    4.04    0.84
 -18   5   0    2.52    0.66
  18  -5   0    4.02    0.85
 -18   4   0   22.01    1.57
 -18   4   0   17.84    1.16
 -18   4   0   17.14    1.30
  18  -4   0   22.79    1.44
 -18   3   0    0.50    0.37
 -18   3   0   -0.13    0.38
 -18   2   0    1.58    0.44
 -18   2   0    2.22    0.64
 -18   1   0   -0.25    0.36
 -18   1   0    0.20    0.31
 -18   0   0   34.26    1.82
 -18   0   0   33.94    1.82
 -18  -1   0    0.52    0.37
 -18  -1   0    0.00    0.35
  18   1   0   -0.16    0.35
 -18  -2   0    0.98    0.40
 -18  -2   0    0.34    0.38
  18   2   0    1.37    0.48
 -18  -3   0    0.67    0.36
  18   3   0    1.22    0.47
  18   3   0    0.41    0.32
 -18  -4   0   18.33    1.21
  18   4   0   19.49    1.34
 -18  -5   0    3.57    0.65
  18   5   0    3.09    0.75
 -18  -6   0    1.00    0.38
 -18  -6   0    1.11    0.51
  18   6   0    0.80    0.47
 -18  -7   0    0.49    0.52
 -18  -7   0    0.86    0.37
  18   7   0    1.51    0.60
 -18  -8   0   14.17    0.98
 -18  -8   0   13.11    1.50
  18   8   0   15.93    1.44
 -19   7   0   -0.07    0.48
  19  -7   0   -0.18    0.38
 -19   6   0    0.33    0.47
  19  -6   0   -0.13    0.40
 -19   5   0   -0.35    0.36
 -19   5   0   -0.13    0.32
 -19   4   0    0.41    0.31
 -19   4   0   -0.27    0.34
 -19   4   0    0.62    0.50
 -19   3   0   -0.37    0.28
 -19   3   0   -0.55    0.26
 -19   3   0   -0.01    0.42
 -19   2   0    0.05    0.41
 -19   2   0   -0.17    0.32
 -19   1   0    0.32    0.43
 -19   1   0    0.13    0.38
 -19   0   0    0.44    0.40
 -19   0   0   -0.21    0.30
 -19  -1   0   -0.43    0.33
 -19  -1   0   -0.41    0.34
  19   1   0    0.05    0.40
 -19  -2   0   -0.23    0.31
  19   2   0   -0.60    0.34
 -19  -3   0   -0.06    0.33
  19   3   0    0.90    0.49
 -19  -4   0   -0.05    0.29
  19   4   0   -0.15    0.44
 -19  -5   0   -0.69    0.28
 -19  -5   0   -0.11    0.41
  19   5   0   -0.05    0.41
 -19  -6   0    0.13    0.34
 -19  -6   0   -0.06    0.43
  19   6   0   -0.12    0.42
 -19  -7   0    0.53    0.33
 -19  -7   0   -0.13    0.48
  19   7   0    0.07    0.44
 -20   6   0    9.80    1.25
 -20   5   0   17.54    1.51
 -20   4   0    7.39    0.88
 -20   4   0    7.26    1.16
 -20   3   0   20.40    1.55
 -20   3   0   20.45    1.35
 -20   2   0    4.35    0.79
 -20   2   0    5.39    1.00
 -20   1   0    0.11    0.42
 -20   0   0   24.68    1.62
 -20   0   0   26.73    1.76
 -20  -1   0    0.43    0.44
  20   1   0    1.53    0.57
 -20  -2   0    2.53    0.61
  20   2   0    5.05    0.89
 -20  -3   0   20.18    1.38
  20   3   0   22.25    1.59
 -20  -4   0    4.62    0.96
 -20  -4   0    5.57    0.82
  20   4   0    4.69    1.01
 -20  -5   0   18.01    1.51
 -20  -5   0   17.19    1.25
  20   5   0   15.63    1.37
 -20  -6   0    8.88    0.94
 -20  -6   0    7.95    1.18
  20   6   0    9.87    1.15
 -21   4   0    0.28    0.49
 -21   3   0    0.69    0.40
 -21   3   0    0.56    0.49
 -21   2   0   -0.21    0.47
 -21   2   0    0.04    0.35
 -21   1   0   -0.35    0.35
 -21   1   0    0.07    0.37
 -21   0   0    0.11    0.38
 -21   0   0    0.25    0.40
 -21  -1   0   -0.24    0.34
 -21  -1   0   -0.13    0.38
 -21  -2   0    0.32    0.39
 -21  -2   0    0.80    0.50
  21   2   0   -0.29    0.43
 -21  -3   0    0.45    0.40
 -21  -3   0    0.17    0.43
  21   3   0    0.64    0.53
 -21  -4   0    0.56    0.52
 -21  -4   0    0.68    0.46
  21   4   0    0.01    0.48
  21   5   0    0.38    0.54
 -22   2   0    5.34    1.04
 -22   2   0    5.50    0.83
 -22   1   0    0.39    0.42
 -22   1   0   -0.12    0.39
 -22   0   0   -0.26    0.38
 -22   0   0    0.50    0.46
 -22  -1   0    0.00    0.43
 -22  -1   0   -0.05    0.42
 -22  -2   0    5.86    1.07
 -22  -2   0    5.37    0.94
  22   2   0    3.29    0.93
  22   2   1    1.84    0.66
 -22  -2  -1    1.65    0.59
 -22  -1  -1   -0.05    0.40
 -22   0  -1    1.57    0.59
 -22   1  -1    0.23    0.36
 -22   1  -1   -0.08    0.45
 -22   2  -1    1.59    0.58
  21   4   1    0.43    0.59
 -21  -4  -1    0.48    0.42
  21   3   1    9.74    1.13
 -21  -3  -1    9.55    1.06
  21   2   1    2.50    0.71
 -21  -2  -1    1.10    0.50
  21   1   1    0.03    0.45
 -21  -1  -1   -0.41    0.36
 -21   0  -1    0.58    0.48
 -21   1  -1    0.77    0.51
 -21   2  -1    1.20    0.54
 -21   3  -1    9.78    1.21
 -21   3  -1    9.52    1.01
 -21   4  -1    0.53    0.52
  20   6   1    1.61    0.64
 -20  -6  -1    2.94    0.74
 -20  -6  -1    2.21    0.68
  20   5   1    0.86    0.57
 -20  -5  -1    0.94    0.44
  20   4   1   21.48    1.60
 -20  -4  -1   21.80    1.45
  20   3   1    3.66    0.94
 -20  -3  -1    2.65    0.71
  20   2   1   10.28    1.10
 -20  -2  -1    9.41    1.04
 -20  -2  -1   10.19    1.09
  20   1   1    9.40    1.08
 -20  -1  -1    9.85    1.06
 -20  -1  -1   10.13    1.08
 -20   0  -1    1.83    0.54
 -20   0  -1    3.13    0.85
 -20   1  -1   10.49    1.16
 -20   2  -1   10.16    1.14
 -20   3  -1    1.80    0.62
 -20   4  -1   25.25    1.76
 -20   4  -1   22.48    1.42
 -20   5  -1    0.76    0.49
 -20   6  -1    1.87    0.68
  19   7   1    0.54    0.54
 -19  -7  -1    1.22    0.41
 -19  -7  -1    1.04    0.59
  19   6   1   -0.39    0.43
 -19  -6  -1    0.30    0.35
  19   5   1    2.07    0.62
 -19  -5  -1    3.28    0.70
  19   4   1    0.14    0.42
 -19  -4  -1    0.09    0.35
  19   3   1    4.93    0.85
 -19  -3  -1    6.18    0.82
  19   2   1    1.85    0.55
 -19  -2  -1    1.86    0.51
 -19  -2  -1    0.70    0.44
  19   1   1    0.61    0.47
 -19  -1  -1    1.01    0.43
 -19  -1  -1    1.32    0.49
 -19   0  -1    4.87    0.83
 -19   0  -1    5.59    0.89
 -19   1  -1    0.83    0.43
 -19   1  -1    1.10    0.50
 -19   2  -1    0.91    0.48
 -19   2  -1    0.85    0.42
 -19   3  -1    5.77    0.88
 -19   3  -1    5.21    0.91
 -19   4  -1   -0.43    0.34
 -19   4  -1   -0.07    0.35
 -19   5  -1    1.61    0.60
  19  -6   1   -0.03    0.41
 -19   6  -1   -0.77    0.37
  19  -7   1    1.14    0.59
 -19   7  -1    0.77    0.56
  18   8   1    0.65    0.58
 -18  -8  -1    0.01    0.30
 -18  -8  -1   -0.24    0.54
  18   7   1   26.70    1.73
 -18  -7  -1   29.77    1.50
 -18  -7  -1   27.51    1.89
  18   6   1    2.88    0.77
 -18  -6  -1    3.38    0.67
  18   5   1    3.28    0.76
 -18  -5  -1    2.14    0.58
  18   4   1    4.36    0.79
 -18  -4  -1    3.42    0.71
  18   3   1   12.13    1.08
 -18  -3  -1   11.22    1.09
 -18  -3  -1   14.17    1.06
  18   2   1    0.23    0.42
 -18  -2  -1    0.10    0.31
 -18  -2  -1   -0.02    0.31
  18   1   1   39.07    1.92
 -18  -1  -1   37.77    1.90
 -18  -1  -1   37.73    1.93
 -18   0  -1    0.57    0.41
 -18   0  -1    0.55    0.40
 -18   1  -1   39.58    2.02
 -18   1  -1   38.44    1.95
 -18   2  -1    0.22    0.30
 -18   2  -1    0.80    0.42
 -18   3  -1   11.94    1.13
 -18   3  -1   11.96    1.07
  18  -4   1    4.74    0.78
 -18   4  -1    4.12    0.76
 -18   4  -1    3.32    0.80
  18  -5   1    1.87    0.58
 -18   5  -1    2.00    0.59
 -18   5  -1    1.34    0.47
  18  -6   1    3.38    0.89
 -18   6  -1    2.42    0.68
 -18   6  -1    2.93    0.73
  18  -7   1   28.11    1.85
 -18   7  -1   31.03    2.04
 -18   7  -1   28.32    1.75
  18  -8   1    0.35    0.57
 -18   8  -1    0.06    0.47
 -18   8  -1    0.56    0.42
  17   9   1    0.05    0.49
 -17  -9  -1   -0.09    0.46
 -17  -9  -1   -0.15    0.24
  17   8   1    1.96    0.64
 -17  -8  -1    1.77    0.42
 -17  -8  -1    1.09    0.54
  17   7   1   -0.15    0.38
 -17  -7  -1    0.07    0.29
  17   6   1   -0.01    0.39
 -17  -6  -1    0.22    0.26
  17   5   1    0.59    0.41
  17   5   1    0.46    0.26
 -17  -5  -1    0.61    0.34
  17   4   1    3.87    0.80
  17   4   1    6.06    0.66
 -17  -4  -1    4.41    0.64
  17   3   1    2.09    0.50
  17   3   1    3.73    0.69
 -17  -3  -1    2.56    0.62
 -17  -3  -1    2.31    0.57
  17   2   1    0.24    0.35
 -17  -2  -1    0.35    0.33
 -17  -2  -1    0.06    0.29
  17   1   1   -0.12    0.34
 -17  -1  -1   -0.25    0.32
 -17  -1  -1   -0.28    0.29
  17   0   1    4.13    0.71
 -17   0  -1    4.98    0.71
 -17   0  -1    2.75    0.74
 -17   1  -1   -0.05    0.26
 -17   1  -1    0.63    0.38
  17  -2   1    0.07    0.30
 -17   2  -1   -0.04    0.32
 -17   2  -1    0.06    0.29
  17  -3   1    3.56    0.65
 -17   3  -1    3.39    0.67
 -17   3  -1    3.57    0.73
  17  -4   1    5.61    0.84
 -17   4  -1    5.84    0.79
 -17   4  -1    6.84    0.90
  17  -5   1    0.36    0.37
 -17   5  -1    0.89    0.40
 -17   5  -1    1.09    0.55
  17  -6   1   -0.76    0.27
 -17   6  -1   -0.16    0.28
 -17   6  -1    0.12    0.43
  17  -7   1   -0.76    0.33
 -17   7  -1   -0.14    0.37
 -17   7  -1    0.35    0.38
 -17   7  -1    0.02    0.44
  17  -8   1    1.85    0.66
 -17   8  -1    1.87    0.68
 -17   8  -1    2.42    0.64
 -17   8  -1    1.39    0.50
  17  -9   1   -0.80    0.35
 -17   9  -1    0.12    0.36
 -17   9  -1   -0.21    0.30
  16   9   1    5.14    1.02
 -16  -9  -1    4.90    0.61
 -16  -9  -1    3.30    0.80
  16   8   1    1.98    0.61
 -16  -8  -1    1.51    0.38
 -16  -8  -1    1.56    0.62
  16   7   1    8.13    0.95
  16   7   1    7.12    0.69
 -16  -7  -1    7.70    0.73
  16   6   1    2.23    0.53
  16   6   1    2.58    0.68
  16   6   1    3.32    0.49
 -16  -6  -1    3.29    0.58
  16   5   1    3.06    0.69
  16   5   1    4.07    0.50
  16   5   1    4.09    0.58
 -16  -5  -1    3.56    0.57
  16   4   1   10.45    0.68
  16   4   1    9.85    0.77
  16   4   1    9.83    0.92
 -16  -4  -1   10.98    0.87
  16   3   1    0.00    0.30
  16   3   1    0.43    0.25
 -16  -3  -1   -0.16    0.20
 -16  -3  -1    0.01    0.28
 -16  -3  -1    0.21    0.30
  16   2   1   11.34    0.95
 -16  -2  -1   11.82    0.73
 -16  -2  -1   12.09    0.94
 -16  -2  -1   10.77    0.94
  16   1   1    7.83    0.80
 -16  -1  -1    8.54    0.86
 -16  -1  -1    9.92    0.56
 -16  -1  -1    8.41    0.61
 -16  -1  -1    7.86    0.91
  16   0   1    5.85    0.70
  16   0   1    7.22    0.79
 -16   0  -1    6.83    0.83
 -16   0  -1    6.97    0.54
 -16   0  -1    6.29    0.53
 -16   0  -1    5.41    0.83
  16  -1   1    9.73    0.86
 -16   1  -1    7.86    0.84
 -16   1  -1    9.24    0.64
 -16   1  -1   10.16    0.95
 -16   1  -1    9.02    0.66
  16  -2   1   12.48    0.95
 -16   2  -1   12.05    0.76
 -16   2  -1   12.12    0.98
 -16   2  -1   11.10    0.99
  16  -3   1    0.26    0.35
 -16   3  -1    0.26    0.29
 -16   3  -1    0.17    0.32
  16  -4   1   11.11    0.97
 -16   4  -1   10.30    0.93
 -16   4  -1   10.53    1.01
  16  -5   1    3.72    0.77
 -16   5  -1    3.51    0.70
 -16   5  -1    3.48    0.81
  16  -6   1    3.23    0.74
 -16   6  -1    2.54    0.66
 -16   6  -1    3.27    0.64
 -16   6  -1    3.54    0.70
  16  -7   1    7.89    1.09
 -16   7  -1    4.28    0.89
 -16   7  -1    5.57    0.84
 -16   7  -1    8.60    0.89
  16  -8   1    1.74    0.62
 -16   8  -1    0.72    0.54
 -16   8  -1    1.10    0.43
 -16   8  -1    1.41    0.48
  16  -9   1    5.11    1.06
 -16   9  -1    4.03    0.82
 -16   9  -1    4.19    0.78
  15  10   1    0.25    0.49
 -15 -10  -1    0.36    0.23
 -15 -10  -1    0.26    0.47
  15   9   1    3.73    0.67
  15   9   1    3.19    0.84
 -15  -9  -1    4.79    0.95
 -15  -9  -1    5.19    0.58
  15   8   1    0.41    0.41
  15   8   1    0.30    0.29
 -15  -8  -1   -0.26    0.49
 -15  -8  -1    0.27    0.26
  15   7   1    3.55    0.56
  15   7   1    2.34    0.60
 -15  -7  -1    2.78    0.51
  15   6   1    0.46    0.26
  15   6   1    0.42    0.40
  15   6   1    0.72    0.33
 -15  -6  -1    0.67    0.30
  15   5   1    1.83    0.49
  15   5   1    2.42    0.42
  15   5   1    2.40    0.49
 -15  -5  -1    2.04    0.47
  15   4   1    1.35    0.34
  15   4   1    2.20    0.39
  15   4   1    0.82    0.38
 -15  -4  -1    1.25    0.33
 -15  -4  -1    1.83    0.51
 -15  -4  -1    2.06    0.49
  15   3   1    6.82    0.64
  15   3   1    7.48    0.77
 -15  -3  -1    6.50    0.67
 -15  -3  -1    7.69    0.61
 -15  -3  -1    6.58    0.72
  15   2   1    1.16    0.40
 -15  -2  -1    0.76    0.35
 -15  -2  -1    0.77    0.26
 -15  -2  -1    1.03    0.24
 -15  -2  -1    0.84    0.34
  15   1   1    6.33    0.65
  15   1   1    6.83    0.74
 -15  -1  -1    6.47    0.74
 -15  -1  -1    7.43    0.56
 -15  -1  -1    8.41    0.51
 -15  -1  -1    4.71    0.70
  15   0   1    0.88    0.37
  15   0   1    0.27    0.28
 -15   0  -1    0.36    0.21
 -15   0  -1   -0.52    0.25
 -15   0  -1    0.18    0.31
 -15   0  -1    0.73    0.25
  15  -1   1    7.53    0.76
 -15   1  -1    6.97    0.76
 -15   1  -1    8.73    0.60
 -15   1  -1    7.28    0.78
  15  -2   1    1.04    0.37
 -15   2  -1    1.22    0.34
 -15   2  -1    0.72    0.36
 -15   2  -1    1.09    0.35
  15  -3   1    5.81    0.71
 -15   3  -1    7.75    0.87
 -15   3  -1    5.61    0.70
  15  -4   1    1.04    0.40
 -15   4  -1    1.13    0.36
 -15   4  -1    2.10    0.60
  15  -5   1    2.36    0.62
 -15   5  -1    1.36    0.39
 -15   5  -1    2.49    0.61
 -15   5  -1    3.57    0.70
  15  -6   1    0.34    0.37
 -15   6  -1    0.81    0.36
 -15   6  -1    0.55    0.37
 -15   6  -1    0.58    0.32
  15  -7   1    3.42    0.80
 -15   7  -1    2.37    0.65
 -15   7  -1    2.46    0.66
 -15   7  -1    3.66    0.69
  15  -8   1   -0.19    0.43
 -15   8  -1   -0.35    0.41
 -15   8  -1   -0.11    0.32
 -15   8  -1   -0.03    0.35
  15  -9   1    4.71    0.92
 -15   9  -1    4.35    0.76
 -15   9  -1    5.25    0.84
  15 -10   1    0.56    0.53
 -15  10  -1    1.04    0.48
  14  10   1   10.18    1.14
  14  10   1    9.25    0.93
 -14 -10  -1   10.32    1.17
 -14 -10  -1    9.47    0.66
  14   9   1    7.26    0.78
  14   9   1    6.46    0.91
 -14  -9  -1    6.64    0.60
 -14  -9  -1    4.65    0.90
  14   8   1    8.79    0.77
  14   8   1    8.22    0.94
 -14  -8  -1    8.37    0.66
 -14  -8  -1    5.93    0.96
  14   7   1    0.59    0.32
  14   7   1    0.83    0.45
  14   7   1    0.20    0.24
 -14  -7  -1    0.37    0.24
  14   6   1   12.61    0.93
  14   6   1   13.36    1.08
  14   6   1   12.93    0.81
 -14  -6  -1   12.49    0.83
  14   5   1    0.87    0.31
  14   5   1    0.71    0.37
  14   5   1    0.83    0.27
 -14  -5  -1    0.28    0.25
 -14  -5  -1    0.43    0.27
  14   4   1   28.93    1.31
  14   4   1   27.90    1.19
  14   4   1   30.50    1.49
 -14  -4  -1   27.06    1.40
 -14  -4  -1   27.40    1.32
 -14  -4  -1   27.82    1.29
  14   3   1    0.99    0.31
  14   3   1    0.83    0.24
  14   3   1    1.03    0.38
 -14  -3  -1    1.13    0.36
 -14  -3  -1    1.02    0.33
 -14  -3  -1    1.28    0.31
  14   2   1   21.95    1.22
  14   2   1   22.73    1.10
 -14  -2  -1   21.96    1.24
 -14  -2  -1   24.09    1.05
 -14  -2  -1   23.05    0.84
 -14  -2  -1   23.79    1.21
 -14  -2  -1   19.61    1.16
  14   1   1    4.70    0.39
  14   1   1    3.92    0.54
  14   1   1    3.97    0.59
 -14  -1  -1    3.88    0.44
 -14  -1  -1    3.86    0.61
 -14  -1  -1    3.92    0.64
 -14  -1  -1    4.65    0.63
 -14  -1  -1    5.28    0.41
  14   0   1   34.08    1.52
  14   0   1   32.53    1.54
 -14   0  -1   32.25    1.59
 -14   0  -1   33.02    1.56
 -14   0  -1   34.18    1.69
 -14   0  -1   31.24    1.27
 -14   0  -1   33.70    1.23
  14  -1   1    4.43    0.57
 -14   1  -1    4.59    0.63
 -14   1  -1    5.16    0.46
 -14   1  -1    3.76    0.60
  14  -2   1   22.82    1.30
 -14   2  -1   26.95    1.12
 -14   2  -1   23.41    1.30
 -14   2  -1   24.48    1.39
  14  -3   1    0.56    0.33
 -14   3  -1    0.72    0.39
 -14   3  -1    1.06    0.36
  14  -4   1   28.95    1.54
 -14   4  -1   28.98    1.61
 -14   4  -1   28.50    1.47
  14  -5   1    0.19    0.36
 -14   5  -1    0.37    0.31
 -14   5  -1    0.47    0.30
 -14   5  -1    0.35    0.35
  14  -6   1   11.63    1.03
 -14   6  -1   10.65    0.89
 -14   6  -1   11.96    1.06
 -14   6  -1   11.10    0.88
  14  -7   1    0.05    0.40
 -14   7  -1    0.40    0.29
 -14   7  -1    0.11    0.37
 -14   7  -1    0.41    0.34
  14  -8   1    8.21    1.02
 -14   8  -1    8.02    0.86
 -14   8  -1    7.61    0.97
 -14   8  -1    7.96    0.86
  14  -9   1    7.35    1.01
 -14   9  -1    6.36    0.78
 -14   9  -1    5.22    0.83
  14 -10   1    8.98    1.14
 -14  10  -1    9.90    1.03
  13  11   1    8.24    0.91
  13  11   1    9.39    1.23
 -13 -11  -1    9.40    0.61
 -13 -11  -1    8.91    1.14
  13  10   1    0.74    0.49
  13  10   1    0.68    0.40
 -13 -10  -1    0.36    0.44
 -13 -10  -1    0.68    0.25
  13   9   1    2.94    0.55
  13   9   1    2.09    0.59
 -13  -9  -1    1.84    0.42
 -13  -9  -1    1.60    0.53
  13   8   1   -0.14    0.32
  13   8   1   -0.07    0.24
 -13  -8  -1    0.08    0.20
  13   7   1    2.50    0.49
  13   7   1    3.48    0.66
  13   7   1    2.36    0.53
 -13  -7  -1    4.15    0.49
  13   6   1    0.40    0.34
  13   6   1    0.40    0.29
  13   6   1    0.19    0.22
 -13  -6  -1    0.51    0.25
  13   5   1   12.35    0.85
  13   5   1   13.14    0.96
  13   5   1   13.11    0.77
 -13  -5  -1   13.47    0.81
 -13  -5  -1   13.68    0.83
 -13  -5  -1   14.49    0.91
  13   4   1   19.10    1.13
  13   4   1   19.47    1.03
  13   4   1   19.32    0.92
 -13  -4  -1   20.67    1.12
 -13  -4  -1   18.76    1.00
 -13  -4  -1   19.39    1.02
  13   3   1   17.10    0.93
  13   3   1   17.84    0.84
  13   3   1   19.28    1.08
  13   3   1   16.46    0.86
 -13  -3  -1   16.93    0.95
 -13  -3  -1   17.29    0.89
 -13  -3  -1   17.75    0.98
 -13  -3  -1   15.74    1.00
  13   2   1    8.93    0.74
  13   2   1    7.62    0.62
 -13  -2  -1    9.82    0.72
 -13  -2  -1    9.09    0.59
 -13  -2  -1    8.89    0.72
 -13  -2  -1    9.71    0.47
 -13  -2  -1    8.31    0.74
  13   1   1    6.75    0.60
  13   1   1    7.62    0.69
 -13  -1  -1    7.48    0.72
 -13  -1  -1    7.69    0.69
 -13  -1  -1    7.61    0.69
 -13  -1  -1    7.83    0.46
 -13  -1  -1    7.98    0.53
  13   0   1   -0.25    0.18
  13   0   1   -0.01    0.25
 -13   0  -1    0.24    0.26
 -13   0  -1    0.05    0.15
 -13   0  -1   -0.09    0.25
 -13   0  -1   -0.09    0.20
 -13   0  -1    0.00    0.16
  13  -1   1    8.20    0.68
 -13   1  -1    8.26    0.76
 -13   1  -1    9.28    0.57
 -13   1  -1    7.46    0.71
  13  -2   1    9.76    0.78
 -13   2  -1    9.17    0.61
 -13   2  -1   10.10    0.85
 -13   2  -1    9.73    0.79
  13  -3   1   16.71    1.06
 -13   3  -1   17.06    1.05
 -13   3  -1   16.10    1.08
  13  -4   1   20.25    1.22
 -13   4  -1   20.39    1.18
 -13   4  -1   19.87    1.24
 -13   4  -1   19.50    1.10
  13  -5   1   15.15    1.08
 -13   5  -1   13.98    0.98
 -13   5  -1   13.04    1.04
 -13   5  -1   12.91    0.92
  13  -6   1    0.00    0.33
 -13   6  -1    0.68    0.31
 -13   6  -1    0.25    0.25
 -13   6  -1    0.81    0.41
  13  -7   1    2.64    0.60
 -13   7  -1    3.70    0.71
 -13   7  -1    3.29    0.57
 -13   7  -1    3.59    0.64
  13  -8   1   -0.70    0.33
 -13   8  -1   -0.10    0.37
 -13   8  -1    0.24    0.32
 -13   8  -1   -0.11    0.26
  13  -9   1    2.23    0.63
 -13   9  -1    1.25    0.42
 -13   9  -1    2.82    0.59
 -13   9  -1    2.87    0.77
  13 -10   1    0.48    0.48
 -13  10  -1    1.06    0.48
  13 -11   1   10.09    1.24
 -13  11  -1    9.58    1.03
  12  11   1    2.16    0.67
  12  11   1    1.53    0.52
 -12 -11  -1    1.91    0.42
 -12 -11  -1    2.16    0.62
  12  10   1    5.35    0.96
  12  10   1    5.39    0.77
 -12 -10  -1    5.91    0.87
 -12 -10  -1    6.16    0.53
  12   9   1   -0.43    0.23
  12   9   1   -0.08    0.34
 -12  -9  -1   -0.01    0.39
 -12  -9  -1    0.16    0.20
  12   8   1    3.42    0.57
  12   8   1    3.59    0.69
 -12  -8  -1    3.69    0.46
  12   7   1    0.44    0.26
  12   7   1    0.19    0.28
  12   7   1    0.63    0.37
  12   7   1    0.42    0.25
 -12  -7  -1    0.58    0.23
  12   6   1   20.89    1.05
  12   6   1   20.57    1.14
  12   6   1   21.09    1.23
 -12  -6  -1   21.17    1.01
 -12  -6  -1   20.86    0.95
  12   5   1   10.91    0.69
  12   5   1   10.09    0.75
  12   5   1    9.56    0.81
 -12  -5  -1   10.28    0.64
 -12  -5  -1   10.78    0.69
 -12  -5  -1   11.15    0.77
  12   4   1   41.79    1.61
  12   4   1   39.48    1.71
  12   4   1   40.08    1.45
  12   4   1   40.51    1.50
 -12  -4  -1   39.49    1.58
 -12  -4  -1   42.12    1.61
 -12  -4  -1   39.46    1.67
  12   3   1    1.27    0.34
  12   3   1    1.48    0.32
  12   3   1    0.54    0.32
  12   3   1    0.98    0.23
 -12  -3  -1    0.90    0.25
 -12  -3  -1    1.85    0.41
 -12  -3  -1    1.49    0.35
 -12  -3  -1    0.91    0.28
  12   2   1   36.58    1.58
  12   2   1   37.93    1.48
  12   2   1   37.36    1.38
 -12  -2  -1   38.74    1.56
 -12  -2  -1   39.19    1.20
 -12  -2  -1   38.39    1.56
 -12  -2  -1   38.41    1.63
 -12  -2  -1   38.27    1.43
  12   1   1    1.01    0.26
  12   1   1    1.28    0.33
 -12  -1  -1    0.71    0.28
 -12  -1  -1    1.05    0.31
 -12  -1  -1    1.06    0.25
 -12  -1  -1    1.48    0.23
 -12  -1  -1    1.09    0.30
  12   0   1    2.10    0.41
  12   0   1    2.12    0.37
 -12   0  -1    2.45    0.46
 -12   0  -1    2.50    0.30
 -12   0  -1    2.39    0.42
 -12   0  -1    2.04    0.45
 -12   0  -1    2.76    0.31
  12  -1   1    0.85    0.27
 -12   1  -1    1.97    0.30
 -12   1  -1    0.83    0.30
 -12   1  -1    1.35    0.38
  12  -2   1   41.04    1.70
 -12   2  -1   35.99    1.62
 -12   2  -1   41.01    1.47
 -12   2  -1   37.28    1.68
  12  -3   1    1.81    0.46
 -12   3  -1    0.99    0.35
 -12   3  -1    0.93    0.31
 -12   3  -1    0.90    0.29
  12  -4   1   38.03    1.77
 -12   4  -1   39.93    1.82
 -12   4  -1   42.26    1.69
 -12   4  -1   38.35    1.68
  12  -5   1   10.51    0.92
 -12   5  -1    9.43    0.77
 -12   5  -1    9.81    0.79
 -12   5  -1   10.82    0.90
  12  -6   1   21.58    1.31
 -12   6  -1   19.89    1.12
 -12   6  -1   19.90    1.15
 -12   6  -1   20.16    1.28
  12  -7   1    0.54    0.36
 -12   7  -1    0.60    0.30
 -12   7  -1    0.41    0.35
 -12   7  -1    0.39    0.26
  12  -8   1    3.59    0.75
 -12   8  -1    4.77    0.68
 -12   8  -1    3.64    0.59
 -12   8  -1    3.99    0.71
  12  -9   1    0.00    0.43
 -12   9  -1    0.60    0.37
 -12   9  -1    0.19    0.24
 -12   9  -1   -0.02    0.27
  12 -10   1    5.95    0.93
 -12  10  -1    5.84    0.81
  12 -11   1    2.42    0.69
 -12  11  -1    1.76    0.51
  11  12   1    1.52    0.64
 -11 -12  -1    1.10    0.27
 -11 -12  -1    1.42    0.58
  11  11   1    2.38    0.60
  11  11   1    3.14    0.82
 -11 -11  -1    2.82    0.67
 -11 -11  -1    3.52    0.47
  11  10   1    2.29    0.62
  11  10   1    1.95    0.58
 -11 -10  -1    1.60    0.46
 -11 -10  -1    2.80    0.41
  11   9   1    0.19    0.30
  11   9   1    0.12    0.35
 -11  -9  -1    0.27    0.18
 -11  -9  -1   -0.32    0.33
  11   8   1    0.39    0.31
  11   8   1    0.13    0.34
  11   8   1    0.28    0.29
 -11  -8  -1    0.67    0.22
  11   7   1    3.05    0.61
  11   7   1    3.97    0.50
  11   7   1    4.34    0.52
  11   7   1    4.42    0.31
  11   7   1    4.06    0.56
 -11  -7  -1    3.74    0.39
 -11  -7  -1    4.42    0.46
  11   6   1   -0.01    0.10
  11   6   1   -0.12    0.19
  11   6   1   -0.04    0.20
  11   6   1   -0.18    0.15
  11   6   1   -0.12    0.23
 -11  -6  -1    0.04    0.19
 -11  -6  -1   -0.07    0.14
 -11  -6  -1    0.03    0.16
  11   5   1    0.28    0.27
  11   5   1    0.14    0.18
  11   5   1    0.03    0.19
  11   5   1    0.10    0.11
  11   5   1   -0.16    0.18
 -11  -5  -1    0.33    0.18
 -11  -5  -1    0.06    0.21
 -11  -5  -1    0.04    0.17
  11   4   1   16.97    0.93
  11   4   1   16.57    0.76
  11   4   1   16.90    0.99
  11   4   1   18.51    0.85
  11   4   1   16.88    0.90
 -11  -4  -1   16.87    0.83
 -11  -4  -1   17.18    0.95
 -11  -4  -1   17.07    0.87
 -11  -4  -1   19.39    0.94
  11   3   1    7.93    0.51
  11   3   1    8.28    0.51
  11   3   1    8.54    0.66
  11   3   1    7.78    0.57
  11   3   1    8.08    0.66
 -11  -3  -1    6.52    0.53
 -11  -3  -1    6.76    0.62
 -11  -3  -1    7.77    0.57
  11   2   1    6.04    0.46
  11   2   1    5.48    0.55
  11   2   1    5.10    0.41
  11   2   1    6.35    0.57
 -11  -2  -1    5.69    0.54
 -11  -2  -1    5.45    0.50
 -11  -2  -1    5.99    0.33
 -11  -2  -1    5.81    0.44
 -11  -2  -1    5.82    0.50
  11   1   1    1.55    0.35
  11   1   1    1.40    0.34
  11   1   1    1.38    0.22
  11   1   1    1.52    0.32
 -11  -1  -1    1.17    0.24
 -11  -1  -1    0.84    0.25
 -11  -1  -1    0.89    0.25
 -11  -1  -1    1.82    0.34
 -11  -1  -1    1.48    0.22
  11   0   1   20.74    1.01
  11   0   1   20.03    0.98
  11   0   1   19.30    0.73
  11   0   1   19.28    1.01
 -11   0  -1   17.26    0.97
 -11   0  -1   19.17    0.82
 -11   0  -1   19.31    1.01
 -11   0  -1   18.98    1.01
  11  -1   1    1.51    0.35
  11  -1   1    1.88    0.35
  11  -1   1    1.16    0.31
 -11   1  -1    1.42    0.34
 -11   1  -1    1.48    0.26
 -11   1  -1    0.99    0.27
 -11   1  -1    1.25    0.34
  11  -2   1    5.77    0.56
  11  -2   1    5.04    0.52
 -11   2  -1    4.76    0.53
 -11   2  -1    5.03    0.55
  11  -3   1    8.61    0.70
 -11   3  -1    7.19    0.68
 -11   3  -1    8.15    0.68
 -11   3  -1    7.53    0.66
  11  -4   1   18.90    1.13
 -11   4  -1   18.45    1.02
 -11   4  -1   16.58    1.06
 -11   4  -1   19.30    1.02
  11  -5   1    0.09    0.25
 -11   5  -1    0.40    0.26
 -11   5  -1    0.14    0.23
 -11   5  -1    0.02    0.07
 -11   5  -1    0.01    0.19
  11  -6   1   -0.25    0.23
 -11   6  -1   -0.10    0.09
 -11   6  -1    0.01    0.28
 -11   6  -1    0.11    0.21
 -11   6  -1   -0.12    0.23
  11  -7   1    4.66    0.71
 -11   7  -1    2.97    0.67
 -11   7  -1    3.75    0.55
 -11   7  -1    3.83    0.59
  11  -8   1    0.20    0.35
 -11   8  -1   -0.02    0.22
 -11   8  -1    0.60    0.30
 -11   8  -1    0.33    0.32
  11  -9   1   -0.21    0.31
 -11   9  -1    0.26    0.32
 -11   9  -1   -0.20    0.27
 -11   9  -1   -0.06    0.21
  11 -10   1    2.61    0.74
 -11  10  -1    2.39    0.64
  11 -11   1    3.62    0.87
 -11  11  -1    3.40    0.75
  11 -12   1    1.40    0.63
 -11  12  -1    1.44    0.50
 -10 -12  -1    1.08    0.51
 -10 -12  -1    0.58    0.25
  10  11   1    6.03    0.82
 -10 -11  -1    7.59    0.59
 -10 -11  -1    8.80    1.03
  10  10   1    0.10    0.28
 -10 -10  -1    0.47    0.21
 -10 -10  -1    0.24    0.35
  10   9   1   14.02    1.03
 -10  -9  -1   15.67    1.19
 -10  -9  -1   15.95    0.80
  10   8   1    5.35    0.73
  10   8   1    5.28    0.66
  10   8   1    5.66    0.65
 -10  -8  -1    4.42    0.40
 -10  -8  -1    5.37    0.47
  10   7   1   23.33    1.26
  10   7   1   24.93    1.37
  10   7   1   25.31    1.23
  10   7   1   25.69    0.88
  10   7   1   25.32    1.13
 -10  -7  -1   26.17    1.00
 -10  -7  -1   24.77    1.06
  10   6   1    6.27    0.66
  10   6   1    6.49    0.58
  10   6   1    7.24    0.56
  10   6   1    6.47    0.35
  10   6   1    5.64    0.60
 -10  -6  -1    7.28    0.52
 -10  -6  -1    6.39    0.45
 -10  -6  -1    6.57    0.64
  10   5   1   19.24    1.01
  10   5   1   20.27    0.96
  10   5   1   20.93    1.12
  10   5   1   19.87    0.99
  10   5   1   20.37    0.69
 -10  -5  -1   19.67    0.91
 -10  -5  -1   23.08    1.08
 -10  -5  -1   20.03    0.87
  10   4   1   13.64    0.78
  10   4   1   14.44    0.65
  10   4   1   13.53    0.81
  10   4   1   13.86    0.87
  10   4   1   15.31    0.75
 -10  -4  -1   14.88    0.72
 -10  -4  -1   15.53    0.82
 -10  -4  -1   14.25    0.75
 -10  -4  -1   14.72    0.84
  10   3   1   26.80    1.04
  10   3   1   26.29    1.20
  10   3   1   26.62    1.18
  10   3   1   26.87    1.04
  10   3   1   25.15    1.08
 -10  -3  -1   27.23    1.12
 -10  -3  -1   27.13    1.11
 -10  -3  -1   27.00    1.18
  10   2   1   -0.01    0.18
  10   2   1    0.13    0.15
  10   2   1    0.14    0.13
  10   2   1    0.12    0.12
  10   2   1    0.25    0.13
 -10  -2  -1    0.34    0.15
 -10  -2  -1   -0.02    0.14
 -10  -2  -1    0.00    0.14
 -10  -2  -1    0.10    0.16
 -10  -2  -1    0.22    0.10
  10   1   1   51.04    1.90
  10   1   1   51.95    1.86
  10   1   1   53.33    1.94
  10   1   1   55.95    1.79
  10   1   1   52.71    1.90
 -10  -1  -1   54.35    1.58
 -10  -1  -1   54.21    1.92
 -10  -1  -1   49.95    1.91
 -10  -1  -1   53.03    1.92
 -10  -1  -1   53.70    1.75
  10   0   1   63.18    2.19
  10   0   1   61.61    2.20
  10   0   1   65.46    2.27
  10   0   1   62.77    2.22
  10   0   1   68.08    2.02
 -10   0  -1   61.08    2.23
 -10   0  -1   62.63    2.25
 -10   0  -1   65.61    2.05
 -10   0  -1   66.66    2.29
  10  -1   1   58.47    2.03
  10  -1   1   49.63    1.94
  10  -1   1   53.61    1.97
  10  -1   1   55.11    1.95
 -10   1  -1   52.34    2.00
 -10   1  -1   56.05    1.80
 -10   1  -1   53.10    1.97
 -10   1  -1   55.96    2.06
  10  -2   1    0.34    0.20
  10  -2   1    0.15    0.16
  10  -2   1    0.10    0.15
 -10   2  -1    0.03    0.20
 -10   2  -1   -0.08    0.16
  10  -3   1   27.52    1.24
  10  -3   1   27.14    1.30
  10  -3   1   27.03    1.23
 -10   3  -1   26.69    1.21
 -10   3  -1   27.14    1.30
 -10   3  -1   26.84    1.19
  10  -4   1   14.65    0.94
  10  -4   1   15.00    0.89
 -10   4  -1   14.25    0.95
 -10   4  -1   14.98    0.84
 -10   4  -1   14.29    0.85
  10  -5   1   19.93    1.06
  10  -5   1   20.78    1.18
 -10   5  -1   20.06    1.16
 -10   5  -1   22.46    1.09
 -10   5  -1   20.34    1.06
  10  -6   1    6.05    0.60
  10  -6   1    6.09    0.75
 -10   6  -1    5.89    0.60
 -10   6  -1    7.90    0.73
 -10   6  -1    7.05    0.65
  10  -7   1   27.97    1.53
 -10   7  -1   27.33    1.27
 -10   7  -1   25.83    1.28
 -10   7  -1   25.34    1.41
  10  -8   1    4.05    0.78
 -10   8  -1    5.89    0.68
 -10   8  -1    5.92    0.77
 -10   8  -1    5.80    0.60
  10  -9   1   16.08    1.23
 -10   9  -1   16.50    1.20
 -10   9  -1   16.79    0.98
 -10   9  -1   16.42    1.09
  10 -10   1    0.35    0.41
 -10  10  -1   -0.03    0.32
  10 -11   1    7.09    0.99
 -10  11  -1    7.18    0.88
  10 -12   1    0.63    0.55
 -10  12  -1    1.07    0.48
   9  12   1    0.89    0.48
  -9 -12  -1    0.40    0.27
  -9 -12  -1    1.04    0.48
   9  11   1    2.55    0.66
  -9 -11  -1    4.04    0.51
  -9 -11  -1    4.25    0.73
   9  10   1    0.46    0.33
  -9 -10  -1    0.17    0.30
  -9 -10  -1    0.36    0.21
   9   9   1   -0.06    0.26
  -9  -9  -1    0.05    0.18
  -9  -9  -1   -0.17    0.24
   9   8   1    2.75    0.36
   9   8   1    2.09    0.46
   9   8   1    3.03    0.57
  -9  -8  -1    1.76    0.35
  -9  -8  -1    2.53    0.33
   9   7   1    0.00    0.19
   9   7   1    0.02    0.14
   9   7   1   -0.03    0.23
  -9  -7  -1    0.24    0.17
  -9  -7  -1    0.22    0.14
   9   6   1   -0.18    0.15
   9   6   1    0.10    0.20
   9   6   1    0.08    0.14
   9   6   1    0.10    0.25
  -9  -6  -1    0.00    0.12
  -9  -6  -1   -0.05    0.14
  -9  -6  -1    0.10    0.19
   9   5   1   27.30    0.84
   9   5   1   24.70    0.88
   9   5   1   24.56    1.24
   9   5   1   26.15    1.18
   9   5   1   27.43    1.13
   9   5   1   26.48    1.13
  -9  -5  -1   25.19    1.04
  -9  -5  -1   27.31    1.23
  -9  -5  -1   25.95    1.00
   9   4   1    0.27    0.17
   9   4   1    0.32    0.12
   9   4   1    0.06    0.19
   9   4   1    0.35    0.11
   9   4   1    0.14    0.15
   9   4   1    0.27    0.18
  -9  -4  -1    0.28    0.14
  -9  -4  -1    0.32    0.16
  -9  -4  -1    0.20    0.15
  -9  -4  -1    0.10    0.17
   9   3   1   82.31    2.52
   9   3   1   85.41    2.68
   9   3   1   80.14    2.53
   9   3   1   80.85    2.54
   9   3   1   76.77    2.68
  -9  -3  -1   83.38    2.61
  -9  -3  -1   81.59    2.66
  -9  -3  -1   79.28    2.59
   9   2   1    1.92    0.27
   9   2   1    1.56    0.34
   9   2   1    1.42    0.30
   9   2   1    1.85    0.27
   9   2   1    1.56    0.25
  -9  -2  -1    2.08    0.19
  -9  -2  -1    1.69    0.31
  -9  -2  -1    1.99    0.29
  -9  -2  -1    2.45    0.29
  -9  -2  -1    1.15    0.33
   9   1   1   24.51    0.92
   9   1   1   22.89    0.98
   9   1   1   26.46    1.09
   9   1   1   23.31    0.90
   9   1   1   23.91    1.05
  -9  -1  -1   23.47    0.81
  -9  -1  -1   24.27    1.06
  -9  -1  -1   23.19    0.91
  -9  -1  -1   24.52    1.04
  -9  -1  -1   25.41    1.05
   9   0   1    3.56    0.38
   9   0   1    3.55    0.41
   9   0   1    4.14    0.41
   9   0   1    3.93    0.39
   9   0   1    4.30    0.26
  -9   0  -1    4.51    0.42
  -9   0  -1    3.59    0.38
  -9   0  -1    3.92    0.41
  -9   0  -1    4.00    0.32
   9  -1   1   23.33    1.03
   9  -1   1   23.90    1.05
   9  -1   1   25.04    1.08
   9  -1   1   22.29    1.03
  -9   1  -1   22.93    0.90
  -9   1  -1   22.96    1.05
  -9   1  -1   24.43    1.10
  -9   1  -1   22.69    1.06
   9  -2   1    1.84    0.35
   9  -2   1    1.31    0.32
   9  -2   1    1.53    0.33
  -9   2  -1    1.25    0.31
  -9   2  -1    1.16    0.30
  -9   2  -1    1.95    0.36
   9  -3   1   82.31    2.70
   9  -3   1   82.82    2.82
   9  -3   1   81.62    2.72
  -9   3  -1   81.47    2.64
  -9   3  -1   79.79    2.79
  -9   3  -1   81.58    2.70
   9  -4   1    0.16    0.19
   9  -4   1    0.15    0.16
   9  -4   1    0.06    0.21
  -9   4  -1    0.14    0.17
  -9   4  -1   -0.03    0.18
  -9   4  -1   -0.08    0.16
   9  -5   1   28.12    1.22
   9  -5   1   24.80    1.30
   9  -5   1   25.65    1.26
  -9   5  -1   26.82    1.19
  -9   5  -1   29.53    1.34
  -9   5  -1   25.16    1.17
   9  -6   1   -0.03    0.16
   9  -6   1    0.44    0.28
  -9   6  -1    0.06    0.17
  -9   6  -1    0.54    0.26
  -9   6  -1    0.18    0.26
   9  -7   1    0.11    0.18
   9  -7   1    0.41    0.31
  -9   7  -1    0.25    0.26
  -9   7  -1    0.41    0.26
  -9   7  -1    0.27    0.20
   9  -8   1    2.96    0.63
   9  -8   1    2.28    0.42
  -9   8  -1    1.99    0.45
  -9   8  -1    3.05    0.55
  -9   8  -1    2.84    0.59
   9  -9   1    0.07    0.35
  -9   9  -1   -0.07    0.28
  -9   9  -1   -0.09    0.25
  -9   9  -1    0.01    0.19
   9 -10   1    0.42    0.41
  -9  10  -1    0.41    0.33
   9 -11   1    3.67    0.83
  -9  11  -1    4.39    0.75
   9 -12   1    0.85    0.56
  -9  12  -1    0.31    0.40
  -8 -13  -1   -0.21    0.23
   8  12   1   16.27    1.29
  -8 -12  -1   15.77    0.90
  -8 -12  -1   15.55    1.29
   8  11   1    0.17    0.39
  -8 -11  -1    1.32    0.45
  -8 -11  -1    1.76    0.44
   8  10   1    1.47    0.43
  -8 -10  -1    2.14    0.53
  -8 -10  -1    1.43    0.44
  -8 -10  -1    2.39    0.43
   8   9   1    5.60    0.70
  -8  -9  -1    5.11    0.48
  -8  -9  -1    5.34    0.71
  -8  -9  -1    5.83    0.43
  -8  -9  -1    4.81    0.65
   8   8   1    1.68    0.45
   8   8   1    2.15    0.32
  -8  -8  -1    2.28    0.54
  -8  -8  -1    2.19    0.30
  -8  -8  -1    1.54    0.33
   8   7   1   33.51    1.50
   8   7   1   29.91    1.44
   8   7   1   35.58    1.29
  -8  -7  -1   36.41    1.51
  -8  -7  -1   32.36    1.24
  -8  -7  -1   34.23    1.20
   8   6   1   22.67    1.11
   8   6   1   25.15    1.17
   8   6   1   23.23    0.99
  -8  -6  -1   23.68    0.95
  -8  -6  -1   23.76    1.19
  -8  -6  -1   23.30    0.90
   8   5   1    2.48    0.20
   8   5   1    2.30    0.37
   8   5   1    2.23    0.43
   8   5   1    2.17    0.31
   8   5   1    3.23    0.42
  -8  -5  -1    2.64    0.28
  -8  -5  -1    2.37    0.39
  -8  -5  -1    2.60    0.31
   8   4   1   33.89    1.29
   8   4   1   35.06    1.28
   8   4   1   32.42    1.37
   8   4   1   32.43    0.98
   8   4   1   32.77    1.10
   8   4   1   31.55    1.23
  -8  -4  -1   31.96    1.30
  -8  -4  -1   32.75    1.16
  -8  -4  -1   32.58    1.20
  -8  -4  -1   31.33    1.25
   8   3   1   38.30    1.35
   8   3   1   38.78    1.37
   8   3   1   38.43    1.12
   8   3   1   39.71    1.44
   8   3   1   38.74    1.50
   8   3   1   38.32    1.30
  -8  -3  -1   38.90    1.41
  -8  -3  -1   37.66    1.36
  -8  -3  -1   37.42    1.42
   8   2   1   11.63    0.57
   8   2   1   12.14    0.67
   8   2   1   11.90    0.56
   8   2   1   11.67    0.64
   8   2   1   12.72    0.62
  -8  -2  -1   11.75    0.61
  -8  -2  -1   12.01    0.59
  -8  -2  -1   11.93    0.65
  -8  -2  -1   11.80    0.60
   8   1   1   33.60    1.32
   8   1   1   36.30    1.29
   8   1   1   35.73    1.20
   8   1   1   35.30    1.34
   8   1   1   35.57    1.24
  -8  -1  -1   35.38    1.34
  -8  -1  -1   36.60    1.09
  -8  -1  -1   34.27    1.21
  -8  -1  -1   35.95    1.33
  -8  -1  -1   35.90    1.32
   8   0   1   19.19    0.85
   8   0   1   18.51    0.86
   8   0   1   20.14    0.87
   8   0   1   20.66    0.90
   8   0   1   20.19    0.70
  -8   0  -1   18.85    0.88
  -8   0  -1   17.55    0.85
  -8   0  -1   18.08    0.74
  -8   0  -1   18.82    0.88
   8  -1   1   36.05    1.35
   8  -1   1   35.58    1.37
   8  -1   1   36.69    1.40
   8  -1   1   37.68    1.41
  -8   1  -1   36.93    1.39
  -8   1  -1   37.21    1.44
  -8   1  -1   36.13    1.41
   8  -2   1   12.95    0.70
   8  -2   1   12.37    0.68
   8  -2   1   11.94    0.70
  -8   2  -1   12.02    0.73
  -8   2  -1    9.90    0.63
  -8   2  -1   10.69    0.67
  -8   2  -1   12.17    0.65
   8  -3   1   38.56    1.54
   8  -3   1   37.57    1.45
   8  -3   1   41.21    1.50
  -8   3  -1   38.22    1.45
  -8   3  -1   34.24    1.49
  -8   3  -1   38.33    1.42
   8  -4   1   34.09    1.34
   8  -4   1   32.59    1.36
   8  -4   1   33.50    1.44
  -8   4  -1   32.02    1.30
  -8   4  -1   32.40    1.31
  -8   4  -1   31.05    1.39
   8  -5   1    2.67    0.50
   8  -5   1    2.36    0.38
   8  -5   1    2.61    0.43
  -8   5  -1    2.32    0.40
  -8   5  -1    1.67    0.44
  -8   5  -1    2.64    0.39
   8  -6   1   25.11    1.11
   8  -6   1   21.73    1.21
  -8   6  -1   19.21    1.12
  -8   6  -1   23.47    1.06
  -8   6  -1   24.38    1.12
   8  -7   1   35.46    1.41
   8  -7   1   31.06    1.59
  -8   7  -1   33.05    1.36
  -8   7  -1   32.66    1.55
  -8   7  -1   32.20    1.43
   8  -8   1    2.28    0.42
   8  -8   1    2.88    0.67
  -8   8  -1    2.49    0.51
  -8   8  -1    2.66    0.56
  -8   8  -1    1.71    0.41
   8  -9   1    6.30    0.78
  -8   9  -1    5.55    0.67
  -8   9  -1    5.11    0.52
  -8   9  -1    4.89    0.65
   8 -10   1    1.21    0.49
  -8  10  -1    2.25    0.58
   8 -11   1    0.09    0.44
  -8  11  -1    1.03    0.42
   8 -12   1   16.60    1.44
  -8  12  -1   17.95    1.26
   8 -13   1   -0.10    0.42
  -7 -13  -1    5.01    0.62
   7  12   1    1.77    0.58
  -7 -12  -1    2.32    0.53
  -7 -12  -1    1.23    0.50
   7  11   1   10.18    1.07
  -7 -11  -1   10.08    0.97
  -7 -11  -1   11.01    0.75
   7  10   1   10.35    0.93
  -7 -10  -1   10.81    0.92
  -7 -10  -1   10.46    0.69
  -7 -10  -1   10.43    0.92
   7   9   1    1.31    0.40
  -7  -9  -1    1.23    0.35
  -7  -9  -1    0.91    0.34
  -7  -9  -1    0.97    0.36
  -7  -9  -1    1.56    0.31
   7   8   1    5.63    0.40
   7   8   1    5.53    0.67
  -7  -8  -1    5.93    0.64
  -7  -8  -1    6.38    0.43
  -7  -8  -1    6.03    0.48
   7   7   1    0.26    0.23
   7   7   1    0.10    0.24
   7   7   1   -0.03    0.12
  -7  -7  -1    0.07    0.13
  -7  -7  -1   -0.17    0.14
  -7  -7  -1    0.04    0.24
   7   6   1   25.09    1.00
   7   6   1   27.45    1.23
   7   6   1   26.07    1.18
  -7  -6  -1   25.90    1.17
  -7  -6  -1   27.90    1.30
  -7  -6  -1   26.48    0.96
  -7  -6  -1   24.55    0.99
   7   5   1   84.25    2.58
   7   5   1   80.87    2.68
   7   5   1   84.10    2.68
   7   5   1   80.61    2.39
  -7  -5  -1   83.85    2.77
  -7  -5  -1   83.08    2.55
  -7  -5  -1   80.78    2.50
   7   4   1   50.02    1.90
   7   4   1   55.12    1.64
   7   4   1   51.68    1.81
   7   4   1   53.65    1.82
   7   4   1   52.13    1.78
  -7  -4  -1   52.83    1.78
  -7  -4  -1   53.21    1.73
  -7  -4  -1   53.65    1.70
  -7  -4  -1   55.29    1.88
   7   3   1  103.49    3.15
   7   3   1  108.53    3.21
   7   3   1  105.47    3.11
   7   3   1  104.47    2.78
   7   3   1  104.77    3.10
   7   3   1  102.32    3.27
  -7  -3  -1  103.71    3.16
  -7  -3  -1  103.38    3.20
  -7  -3  -1  106.57    3.20
  -7  -3  -1  107.01    3.14
   7   2   1   89.14    2.61
   7   2   1   90.49    2.69
   7   2   1   84.97    2.56
   7   2   1   84.03    2.69
  -7  -2  -1   83.64    2.64
  -7  -2  -1   86.17    2.60
  -7  -2  -1   80.60    2.65
   7   1   1    6.50    0.44
   7   1   1    7.05    0.46
   7   1   1    6.64    0.36
   7   1   1    6.00    0.39
   7   1   1    6.91    0.37
  -7  -1  -1    6.30    0.37
  -7  -1  -1    6.56    0.42
  -7  -1  -1    6.37    0.42
  -7  -1  -1    6.47    0.46
  -7  -1  -1    6.93    0.46
  -7  -1  -1    6.44    0.31
   7   0   1    0.89    0.23
   7   0   1    0.39    0.14
   7   0   1    0.58    0.17
   7   0   1    0.46    0.14
   7   0   1    0.63    0.11
  -7   0  -1    0.38    0.15
  -7   0  -1    0.87    0.21
  -7   0  -1    0.75    0.21
  -7   0  -1    0.83    0.22
  -7   0  -1    0.83    0.16
   7  -1   1    6.44    0.47
   7  -1   1    7.09    0.46
   7  -1   1    6.90    0.47
   7  -1   1    5.74    0.43
  -7   1  -1    6.82    0.44
  -7   1  -1    7.30    0.51
  -7   1  -1    6.76    0.48
  -7   1  -1    6.80    0.46
   7  -2   1   85.47    2.85
   7  -2   1   88.83    2.79
   7  -2   1   87.11    2.74
  -7   2  -1   87.52    2.79
  -7   2  -1   89.44    2.90
  -7   2  -1   87.15    2.72
  -7   2  -1   95.47    2.89
   7  -3   1  103.42    3.25
   7  -3   1  100.03    3.36
   7  -3   1  104.87    3.23
  -7   3  -1  106.84    3.25
  -7   3  -1  107.84    3.19
  -7   3  -1  106.69    3.36
   7  -4   1   54.03    1.89
   7  -4   1   53.46    1.85
   7  -4   1   53.33    1.99
  -7   4  -1   52.22    1.96
  -7   4  -1   52.52    1.84
  -7   4  -1   52.32    1.82
   7  -5   1   81.18    2.87
   7  -5   1   84.16    2.69
  -7   5  -1   81.73    2.66
  -7   5  -1   82.07    2.84
  -7   5  -1   85.27    2.69
   7  -6   1   27.29    1.14
   7  -6   1   25.58    1.28
  -7   6  -1   26.00    1.17
  -7   6  -1   26.13    1.10
  -7   6  -1   26.36    1.25
   7  -7   1    0.00    0.15
   7  -7   1    0.23    0.28
  -7   7  -1    0.12    0.16
  -7   7  -1    0.40    0.26
  -7   7  -1    0.14    0.21
   7  -8   1    5.31    0.68
  -7   8  -1    5.93    0.62
  -7   8  -1    4.42    0.47
  -7   8  -1    5.33    0.63
   7  -9   1    1.35    0.30
   7  -9   1    2.23    0.63
  -7   9  -1    0.80    0.23
  -7   9  -1    1.40    0.38
  -7   9  -1    1.11    0.36
   7 -10   1    8.86    0.91
  -7  10  -1   11.39    0.91
   7 -11   1   11.38    1.13
  -7  11  -1   11.87    0.99
   7 -12   1    1.69    0.57
  -7  12  -1    1.84    0.52
   7 -13   1    5.27    1.00
  -6 -13  -1    1.35    0.38
   6  12   1   30.28    1.78
  -6 -12  -1   29.15    1.36
  -6 -12  -1   28.35    1.57
   6  11   1    1.17    0.46
  -6 -11  -1    1.79    0.49
  -6 -11  -1    1.16    0.44
   6  10   1    3.17    0.61
  -6 -10  -1    3.49    0.48
  -6 -10  -1    3.39    0.61
  -6 -10  -1    3.15    0.59
   6   9   1    7.35    0.75
  -6  -9  -1    8.91    0.78
  -6  -9  -1    8.08    0.71
  -6  -9  -1    7.84    0.59
  -6  -9  -1    7.95    0.53
   6   8   1    4.15    0.61
   6   8   1    3.85    0.29
  -6  -8  -1    3.00    0.51
  -6  -8  -1    3.22    0.40
  -6  -8  -1    4.31    0.58
  -6  -8  -1    4.67    0.39
   6   7   1   20.02    1.10
   6   7   1   22.50    0.84
  -6  -7  -1   23.38    0.87
  -6  -7  -1   20.47    0.89
  -6  -7  -1   20.67    1.08
   6   6   1   11.13    0.54
   6   6   1    9.95    0.72
   6   6   1   11.67    0.73
  -6  -6  -1   10.16    0.54
  -6  -6  -1   10.43    0.75
  -6  -6  -1   11.69    0.53
  -6  -6  -1   12.53    0.74
   6   5   1   21.69    0.98
   6   5   1   20.68    0.84
   6   5   1   20.08    0.98
  -6  -5  -1   20.46    0.82
  -6  -5  -1   21.54    0.96
  -6  -5  -1   21.38    0.79
  -6  -5  -1   21.39    1.03
   6   4   1  417.47   11.65
   6   4   1  427.92   11.94
   6   4   1  426.21   11.96
   6   4   1  435.69   11.93
  -6  -4  -1  437.27   11.64
  -6  -4  -1  425.60   11.92
  -6  -4  -1  436.68   12.04
  -6  -4  -1  423.73   12.03
  -6  -4  -1  427.40   12.00
   6   3   1   11.96    0.49
   6   3   1   11.59    0.58
   6   3   1   11.48    0.59
   6   3   1   11.56    0.65
   6   3   1   10.98    0.42
   6   3   1   12.64    0.59
  -6  -3  -1   11.20    0.58
  -6  -3  -1   10.95    0.50
  -6  -3  -1   10.98    0.53
  -6  -3  -1   11.68    0.61
   6   2   1    0.87    0.19
   6   2   1    0.73    0.12
   6   2   1    0.63    0.16
   6   2   1    0.96    0.25
   6   2   1    0.71    0.15
   6   2   1    0.80    0.18
  -6  -2  -1    0.47    0.13
  -6  -2  -1    0.66    0.18
  -6  -2  -1    0.61    0.15
  -6  -2  -1    0.59    0.16
   6   1   1   12.29    0.60
   6   1   1   12.83    0.57
   6   1   1   13.49    0.53
   6   1   1   13.65    0.59
   6   1   1   13.36    0.61
  -6  -1  -1   12.52    0.46
  -6  -1  -1   12.51    0.62
  -6  -1  -1   12.38    0.53
  -6  -1  -1   11.96    0.58
  -6  -1  -1   13.46    0.59
  -6  -1  -1   12.65    0.61
  -6  -1  -1   13.51    0.60
   6   0   1  163.81    4.76
   6   0   1  155.49    4.89
   6   0   1  169.34    4.88
   6   0   1  165.80    4.87
   6   0   1  163.71    4.89
   6   0   1  168.81    4.83
  -6   0  -1  169.09    4.87
  -6   0  -1  164.01    4.73
  -6   0  -1  169.87    4.92
  -6   0  -1  173.63    4.93
  -6   0  -1  176.94    4.85
  -6   0  -1  172.31    4.63
   6  -1   1   12.97    0.60
   6  -1   1   12.58    0.62
   6  -1   1   14.66    0.66
   6  -1   1   12.42    0.62
   6  -1   1   12.54    0.64
  -6   1  -1   13.14    0.60
  -6   1  -1   13.64    0.60
  -6   1  -1   13.44    0.66
  -6   1  -1   12.44    0.60
  -6   1  -1   12.91    0.62
  -6   1  -1   13.30    0.65
   6  -2   1    0.36    0.14
   6  -2   1    0.45    0.16
   6  -2   1    0.57    0.15
   6  -2   1    0.84    0.24
  -6   2  -1    0.77    0.21
  -6   2  -1    0.53    0.15
  -6   2  -1    0.38    0.13
  -6   2  -1    0.48    0.15
  -6   2  -1    0.42    0.17
  -6   2  -1    0.92    0.22
   6  -3   1    9.41    0.62
   6  -3   1   11.29    0.61
   6  -3   1   12.46    0.70
   6  -3   1   11.71    0.63
  -6   3  -1   11.18    0.59
  -6   3  -1   11.79    0.59
  -6   3  -1   11.23    0.55
  -6   3  -1    9.83    0.63
   6  -4   1  426.28   12.40
   6  -4   1  423.12   11.96
   6  -4   1  454.88   12.12
  -6   4  -1  432.08   11.90
  -6   4  -1  457.09   11.44
  -6   4  -1  413.59   12.07
  -6   4  -1  417.61   12.36
   6  -5   1   21.75    0.95
   6  -5   1   20.33    1.07
  -6   5  -1   23.14    0.85
  -6   5  -1   20.70    0.93
  -6   5  -1   22.08    0.98
  -6   5  -1   21.95    1.05
   6  -6   1   10.49    0.62
   6  -6   1   11.55    0.79
  -6   6  -1    9.71    0.67
  -6   6  -1   11.24    0.62
  -6   6  -1   11.25    0.53
  -6   6  -1   10.37    0.72
   6  -7   1   21.45    1.18
  -6   7  -1   20.21    1.09
  -6   7  -1   21.64    1.06
  -6   7  -1   20.75    0.79
  -6   7  -1   20.65    0.91
   6  -8   1    3.74    0.59
   6  -8   1    4.03    0.37
  -6   8  -1    3.42    0.49
  -6   8  -1    4.44    0.55
  -6   8  -1    3.86    0.41
   6  -9   1    7.84    0.84
   6  -9   1    7.97    0.49
   6  -9   1    7.40    0.83
  -6   9  -1    8.01    0.54
  -6   9  -1    8.54    0.75
  -6   9  -1    9.42    0.77
   6 -10   1    2.20    0.64
  -6  10  -1    2.69    0.58
   6 -11   1    2.68    0.76
  -6  11  -1    1.23    0.40
  -6  11  -1    0.54    0.48
   6 -12   1   30.27    1.80
  -6  12  -1   33.27    1.71
   6 -13   1    1.85    0.58
  -5 -13  -1    1.16    0.39
   5  12   1    3.69    0.80
  -5 -12  -1    2.41    0.58
  -5 -12  -1    3.10    0.65
   5  11   1    1.02    0.45
  -5 -11  -1    1.07    0.40
  -5 -11  -1    1.10    0.33
   5  10   1    0.93    0.38
  -5 -10  -1    0.47    0.25
  -5 -10  -1    0.94    0.39
  -5 -10  -1    0.61    0.28
   5   9   1    0.25    0.27
   5   9   1    0.02    0.21
  -5  -9  -1   -0.06    0.18
  -5  -9  -1    0.05    0.16
  -5  -9  -1    0.15    0.27
  -5  -9  -1    0.22    0.23
   5   8   1    4.65    0.26
   5   8   1    4.73    0.64
  -5  -8  -1    5.24    0.54
  -5  -8  -1    4.86    0.41
  -5  -8  -1    4.56    0.45
  -5  -8  -1    5.07    0.63
   5   7   1    0.13    0.10
   5   7   1    0.00    0.22
  -5  -7  -1    0.25    0.17
  -5  -7  -1    0.25    0.21
  -5  -7  -1    0.18    0.13
   5   6   1   15.33    0.61
   5   6   1   13.72    0.82
   5   6   1   16.38    0.89
  -5  -6  -1   15.28    0.64
  -5  -6  -1   14.43    0.82
  -5  -6  -1   14.58    0.67
   5   5   1    1.04    0.21
   5   5   1    0.82    0.26
   5   5   1    1.05    0.29
  -5  -5  -1    0.80    0.23
  -5  -5  -1    0.95    0.26
  -5  -5  -1    1.39    0.21
  -5  -5  -1    1.02    0.30
   5   4   1   76.43    2.21
   5   4   1   74.77    2.13
   5   4   1   71.10    2.27
   5   4   1   72.61    2.32
  -5  -4  -1   69.71    2.24
  -5  -4  -1   70.31    2.16
  -5  -4  -1   69.48    2.19
  -5  -4  -1   69.40    2.19
  -5  -4  -1   73.17    2.14
  -5  -4  -1   74.55    2.39
   5   3   1   21.88    0.73
   5   3   1   18.74    0.77
   5   3   1   20.17    0.83
   5   3   1   21.54    0.83
   5   3   1   21.49    0.72
  -5  -3  -1   20.57    0.85
  -5  -3  -1   21.66    0.79
  -5  -3  -1   21.14    0.74
  -5  -3  -1   21.13    0.80
  -5  -3  -1   20.77    0.77
  -5  -3  -1   21.88    0.83
   5   2   1    1.79    0.14
   5   2   1    1.41    0.19
   5   2   1    1.73    0.17
   5   2   1    2.01    0.22
   5   2   1    1.96    0.18
   5   2   1    1.62    0.25
   5   2   1    1.66    0.20
  -5  -2  -1    1.84    0.21
  -5  -2  -1    1.83    0.21
  -5  -2  -1    2.08    0.22
  -5  -2  -1    1.69    0.19
   5   1   1    9.68    0.48
   5   1   1    9.79    0.42
   5   1   1    9.80    0.44
   5   1   1    9.80    0.47
   5   1   1   10.21    0.45
  -5  -1  -1    9.47    0.46
  -5  -1  -1    9.70    0.45
  -5  -1  -1    9.12    0.35
  -5  -1  -1    9.29    0.47
  -5  -1  -1    9.87    0.43
  -5  -1  -1   10.00    0.49
  -5  -1  -1    8.97    0.44
   5   0   1   46.73    1.49
   5   0   1   43.88    1.47
   5   0   1   44.02    1.46
   5   0   1   50.16    1.51
   5   0   1   46.82    1.39
   5   0   1   42.84    1.44
  -5   0  -1   47.13    1.42
  -5   0  -1   45.48    1.49
  -5   0  -1   43.08    1.39
  -5   0  -1   43.80    1.48
  -5   0  -1   46.53    1.50
  -5   0  -1   45.20    1.47
   5  -1   1    9.45    0.48
   5  -1   1    8.16    0.47
   5  -1   1    9.24    0.50
   5  -1   1   10.34    0.48
  -5   1  -1    9.74    0.45
  -5   1  -1    9.54    0.51
  -5   1  -1    9.55    0.48
  -5   1  -1    9.34    0.47
  -5   1  -1    9.91    0.50
   5  -2   1    1.60    0.22
   5  -2   1    1.50    0.23
   5  -2   1    2.43    0.28
   5  -2   1    1.95    0.26
  -5   2  -1    2.11    0.27
  -5   2  -1    1.98    0.23
  -5   2  -1    1.69    0.23
  -5   2  -1    1.50    0.24
  -5   2  -1    1.90    0.20
   5  -3   1   24.76    0.98
   5  -3   1   20.69    0.88
   5  -3   1   22.37    0.88
   5  -3   1   21.45    0.95
  -5   3  -1   23.32    0.81
  -5   3  -1   21.50    0.87
  -5   3  -1   20.71    0.92
  -5   3  -1   23.06    0.88
   5  -4   1   70.25    2.42
   5  -4   1   71.27    2.26
  -5   4  -1   75.16    2.10
  -5   4  -1   70.22    2.25
  -5   4  -1   72.63    2.39
  -5   4  -1   71.01    2.26
   5  -5   1    1.33    0.33
   5  -5   1    1.87    0.28
  -5   5  -1    0.60    0.21
  -5   5  -1    1.66    0.28
  -5   5  -1    1.39    0.31
  -5   5  -1    1.55    0.22
   5  -6   1   14.53    0.72
   5  -6   1   15.66    0.89
  -5   6  -1   16.00    0.82
  -5   6  -1   15.13    0.71
  -5   6  -1   14.98    0.83
  -5   6  -1   16.08    0.62
   5  -7   1    0.18    0.26
  -5   7  -1    0.16    0.20
  -5   7  -1   -0.13    0.19
  -5   7  -1    0.18    0.14
  -5   7  -1    0.29    0.12
   5  -8   1    5.72    0.66
   5  -8   1    5.54    0.66
   5  -8   1    3.89    0.34
  -5   8  -1    4.75    0.56
  -5   8  -1    4.74    0.40
  -5   8  -1    4.72    0.53
   5  -9   1    0.47    0.31
   5  -9   1    0.50    0.33
  -5   9  -1    0.22    0.14
  -5   9  -1    0.04    0.21
  -5   9  -1    0.19    0.25
   5 -10   1    1.04    0.42
   5 -10   1    0.73    0.37
  -5  10  -1    0.54    0.34
   5 -11   1    0.94    0.43
  -5  11  -1    1.69    0.58
  -5  11  -1    1.43    0.43
   5 -12   1    3.81    0.82
  -5  12  -1    3.68    0.76
  -5  12  -1    3.81    1.01
   5 -13   1    1.59    0.56
  -5  13  -1    2.01    0.56
  -4 -13  -1    1.70    0.44
   4  12   1   20.24    1.48
  -4 -12  -1   23.17    1.24
   4  11   1    1.68    0.51
  -4 -11  -1    2.71    0.52
  -4 -11  -1    2.08    0.54
   4  10   1    1.00    0.40
  -4 -10  -1    0.54    0.33
  -4 -10  -1    0.60    0.26
  -4 -10  -1    0.47    0.25
   4   9   1    2.62    0.56
   4   9   1    2.87    0.42
  -4  -9  -1    3.03    0.39
  -4  -9  -1    3.30    0.46
  -4  -9  -1    3.35    0.49
  -4  -9  -1    3.30    0.56
   4   8   1   26.45    1.14
   4   8   1   26.42    1.35
  -4  -8  -1   24.40    1.09
  -4  -8  -1   26.89    1.06
  -4  -8  -1   25.18    1.20
  -4  -8  -1   26.99    1.31
   4   7   1    8.08    0.39
   4   7   1    7.82    0.68
   4   7   1    8.26    0.34
  -4  -7  -1    9.13    0.71
  -4  -7  -1    7.91    0.52
  -4  -7  -1    7.91    0.48
   4   6   1    1.54    0.35
   4   6   1    1.46    0.17
  -4  -6  -1    2.13    0.36
  -4  -6  -1    1.51    0.23
  -4  -6  -1    1.09    0.25
   4   5   1   10.87    0.66
   4   5   1    8.61    0.60
   4   5   1   10.00    0.43
  -4  -5  -1    9.91    0.50
  -4  -5  -1    9.69    0.46
  -4  -5  -1   10.55    0.68
  -4  -5  -1    9.87    0.63
   4   4   1  206.21    5.61
   4   4   1  197.62    5.58
   4   4   1  203.66    5.61
   4   4   1  195.38    5.75
  -4  -4  -1  205.81    5.82
  -4  -4  -1  196.94    5.58
  -4  -4  -1  196.69    5.64
  -4  -4  -1  198.95    5.35
  -4  -4  -1  189.15    5.66
   4   3   1    7.49    0.32
   4   3   1    7.74    0.44
   4   3   1    6.92    0.41
   4   3   1    7.75    0.36
   4   3   1    7.54    0.32
  -4  -3  -1    6.44    0.35
  -4  -3  -1    7.29    0.33
  -4  -3  -1    7.26    0.37
  -4  -3  -1    7.26    0.35
  -4  -3  -1    7.27    0.42
  -4  -3  -1    7.21    0.44
   4   2   1   25.27    0.82
   4   2   1   24.95    0.83
   4   2   1   24.87    0.86
   4   2   1   24.09    0.87
   4   2   1   25.68    0.86
  -4  -2  -1   25.32    0.87
  -4  -2  -1   25.14    0.83
  -4  -2  -1   24.72    0.85
  -4  -2  -1   25.51    0.85
  -4  -2  -1   24.87    0.90
   4   1   1   77.17    2.06
   4   1   1   80.80    2.31
   4   1   1   77.86    2.26
   4   1   1   74.77    2.32
   4   1   1   78.12    2.32
   4   1   1   79.65    2.31
  -4  -1  -1   80.83    2.35
  -4  -1  -1   77.09    2.31
  -4  -1  -1   78.79    2.32
  -4  -1  -1   76.00    2.27
  -4  -1  -1   76.61    2.06
  -4  -1  -1   78.44    2.22
  -4  -1  -1   77.51    2.32
   4   0   1   74.26    2.21
   4   0   1   70.54    2.16
   4   0   1   66.78    2.19
   4   0   1   74.62    2.20
  -4   0  -1   71.88    2.21
  -4   0  -1   75.89    2.18
  -4   0  -1   74.33    2.22
  -4   0  -1   75.95    2.20
  -4   0  -1   76.82    2.10
  -4   0  -1   69.27    2.11
   4  -1   1   77.91    2.34
   4  -1   1   76.84    2.39
   4  -1   1   73.94    2.38
   4  -1   1   76.13    2.28
  -4   1  -1   80.41    2.32
  -4   1  -1   81.49    2.41
  -4   1  -1   80.83    2.22
  -4   1  -1   79.38    2.39
  -4   1  -1   77.73    2.28
  -4   1  -1   75.96    2.33
   4  -2   1   24.75    0.89
   4  -2   1   24.20    0.96
   4  -2   1   26.03    0.90
   4  -2   1   22.09    0.92
  -4   2  -1   24.70    0.87
  -4   2  -1   26.22    0.90
  -4   2  -1   24.92    0.83
  -4   2  -1   26.53    0.98
   4  -3   1    6.82    0.46
   4  -3   1    6.56    0.41
   4  -3   1    5.93    0.43
   4  -3   1    7.69    0.41
  -4   3  -1    7.01    0.40
  -4   3  -1    7.25    0.45
  -4   3  -1    7.08    0.36
  -4   3  -1    7.47    0.39
  -4   3  -1    7.62    0.50
   4  -4   1  200.84    5.76
   4  -4   1  196.98    5.97
  -4   4  -1  216.02    5.96
  -4   4  -1  199.65    5.74
  -4   4  -1  191.34    5.69
  -4   4  -1  207.25    5.40
   4  -5   1    9.34    0.63
   4  -5   1   10.71    0.53
  -4   5  -1    9.86    0.36
  -4   5  -1    9.40    0.59
  -4   5  -1    9.95    0.43
  -4   5  -1   11.14    0.62
  -4   5  -1    9.79    0.50
   4  -6   1    1.48    0.38
  -4   6  -1    1.71    0.24
  -4   6  -1    1.21    0.32
  -4   6  -1    1.73    0.36
  -4   6  -1    1.28    0.17
   4  -7   1    7.89    0.43
   4  -7   1    8.68    0.71
  -4   7  -1    8.59    0.37
  -4   7  -1    8.19    0.64
  -4   7  -1    7.71    0.62
  -4   7  -1    7.92    0.46
   4  -8   1   25.64    1.31
   4  -8   1   26.19    1.36
  -4   8  -1   26.50    1.25
  -4   8  -1   25.99    0.98
  -4   8  -1   25.29    1.20
   4  -9   1    2.72    0.61
   4  -9   1    1.94    0.54
  -4   9  -1    2.79    0.54
  -4   9  -1    2.84    0.30
  -4   9  -1    3.60    0.50
   4 -10   1    0.67    0.36
   4 -10   1    0.13    0.31
  -4  10  -1    0.87    0.47
  -4  10  -1    0.79    0.35
   4 -11   1    2.70    0.67
  -4  11  -1    4.10    0.69
  -4  11  -1    2.24    0.64
   4 -12   1   23.80    1.45
  -4  12  -1   22.13    1.42
  -4  12  -1   18.51    1.53
   4 -13   1    1.38    0.52
  -4  13  -1    1.94    0.58
  -3 -13  -1   -0.29    0.29
   3  12   1   -0.02    0.36
  -3 -12  -1   -0.15    0.28
   3  11   1    4.65    0.75
  -3 -11  -1    3.16    0.54
  -3 -11  -1    3.07    0.56
   3  10   1   10.51    0.94
  -3 -10  -1    9.55    0.88
  -3 -10  -1    8.87    0.69
  -3 -10  -1    8.91    0.72
   3   9   1   12.82    0.76
   3   9   1   11.97    0.99
  -3  -9  -1   12.85    0.96
  -3  -9  -1   13.08    0.74
  -3  -9  -1   14.76    0.83
  -3  -9  -1   13.40    0.81
   3   8   1    9.93    0.51
   3   8   1    7.32    0.80
   3   8   1    9.74    0.62
  -3  -8  -1   10.50    0.84
  -3  -8  -1    9.36    0.65
  -3  -8  -1    9.44    0.59
  -3  -8  -1    8.75    0.65
   3   7   1    1.30    0.34
   3   7   1    1.65    0.23
   3   7   1    1.67    0.32
  -3  -7  -1    2.77    0.36
  -3  -7  -1    1.18    0.35
  -3  -7  -1    2.02    0.35
  -3  -7  -1    1.78    0.29
   3   6   1    0.35    0.09
   3   6   1    0.34    0.21
  -3  -6  -1    0.40    0.14
  -3  -6  -1    0.23    0.19
  -3  -6  -1    0.25    0.14
   3   5   1    2.71    0.38
   3   5   1    2.51    0.17
  -3  -5  -1    1.94    0.23
  -3  -5  -1    2.08    0.33
  -3  -5  -1    2.31    0.26
   3   4   1   17.43    0.62
   3   4   1   17.63    0.79
   3   4   1   17.01    0.58
   3   4   1   16.94    0.76
  -3  -4  -1   16.25    0.65
  -3  -4  -1   16.79    0.81
  -3  -4  -1   17.03    0.76
  -3  -4  -1   16.38    0.63
   3   3   1   16.55    0.73
   3   3   1   18.18    0.63
   3   3   1   19.80    0.64
   3   3   1   19.18    0.74
   3   3   1   19.33    0.63
  -3  -3  -1   17.13    0.71
  -3  -3  -1   18.45    0.63
  -3  -3  -1   18.29    0.63
  -3  -3  -1   18.69    0.78
  -3  -3  -1   18.36    0.64
  -3  -3  -1   18.10    0.66
   3   2   1   35.31    1.11
   3   2   1   36.05    1.09
   3   2   1   35.12    1.15
   3   2   1   33.90    1.07
   3   2   1   35.10    1.09
  -3  -2  -1   34.73    1.10
  -3  -2  -1   36.16    1.07
  -3  -2  -1   35.12    1.08
  -3  -2  -1   34.17    1.09
  -3  -2  -1   35.70    1.17
  -3  -2  -1   33.40    1.09
   3   1   1    3.85    0.20
   3   1   1    3.91    0.23
   3   1   1    3.86    0.21
   3   1   1    4.05    0.22
   3   1   1    3.72    0.17
   3   1   1    4.01    0.22
  -3  -1  -1    3.95    0.23
  -3  -1  -1    3.84    0.23
  -3  -1  -1    3.88    0.23
  -3  -1  -1    3.71    0.22
   3   0   1   83.99    2.39
   3   0   1   83.95    2.41
   3   0   1   79.87    2.35
   3   0   1   76.88    2.39
  -3   0  -1   83.66    2.36
  -3   0  -1   82.05    2.40
  -3   0  -1   85.45    2.27
  -3   0  -1   84.01    2.41
  -3   0  -1   78.31    2.32
  -3   0  -1   80.46    2.38
   3  -1   1    3.50    0.22
   3  -1   1    4.07    0.26
   3  -1   1    3.90    0.26
   3  -1   1    3.83    0.24
  -3   1  -1    3.97    0.24
  -3   1  -1    3.79    0.26
  -3   1  -1    3.92    0.23
  -3   1  -1    3.62    0.25
   3  -2   1   34.20    1.13
   3  -2   1   35.21    1.14
   3  -2   1   28.77    1.16
   3  -2   1   37.85    1.23
  -3   2  -1   33.80    1.12
  -3   2  -1   36.84    1.14
  -3   2  -1   39.49    1.21
  -3   2  -1   35.67    1.22
   3  -3   1   19.23    0.71
   3  -3   1   18.24    0.79
  -3   3  -1   19.00    0.80
  -3   3  -1   19.16    0.73
  -3   3  -1   18.78    0.70
  -3   3  -1   18.88    0.77
   3  -4   1   17.08    0.78
   3  -4   1   16.98    0.66
  -3   4  -1   14.04    0.71
  -3   4  -1   17.15    0.73
  -3   4  -1   17.01    0.64
   3  -5   1    2.24    0.32
  -3   5  -1    2.56    0.34
  -3   5  -1    2.62    0.24
  -3   5  -1    2.83    0.19
  -3   5  -1    2.22    0.30
   3  -6   1    0.12    0.11
   3  -6   1    0.47    0.21
  -3   6  -1    0.29    0.15
  -3   6  -1    0.29    0.08
  -3   6  -1    0.34    0.11
   3  -7   1    0.98    0.30
   3  -7   1    1.95    0.42
  -3   7  -1    1.86    0.15
  -3   7  -1    1.57    0.34
  -3   7  -1    1.76    0.24
   3  -8   1   10.90    0.86
   3  -8   1   11.48    0.84
  -3   8  -1    9.03    0.68
  -3   8  -1   10.72    0.51
   3  -9   1   11.69    0.97
   3  -9   1   13.47    0.94
  -3   9  -1   12.81    0.55
  -3   9  -1   13.08    0.83
   3 -10   1    9.24    0.84
   3 -10   1   10.50    0.94
  -3  10  -1    9.55    0.97
   3 -11   1    3.61    0.72
  -3  11  -1    3.67    0.73
  -3  11  -1    3.64    0.77
   3 -12   1   -0.02    0.34
  -3  12  -1    0.02    0.35
  -3  12  -1   -0.10    0.37
   3 -13   1    0.14    0.37
  -3  13  -1   -0.60    0.32
  -2 -13  -1   -0.12    0.31
   2  12   1    0.02    0.41
  -2 -12  -1    0.10    0.31
   2  11   1   -0.02    0.38
  -2 -11  -1   -0.23    0.20
  -2 -11  -1    0.11    0.27
   2  10   1    0.18    0.30
  -2 -10  -1    0.30    0.21
  -2 -10  -1    0.68    0.28
  -2 -10  -1    0.03    0.33
   2   9   1   43.98    2.00
   2   9   1   47.34    1.64
  -2  -9  -1   43.18    1.74
  -2  -9  -1   44.66    1.69
  -2  -9  -1   45.89    1.71
  -2  -9  -1   40.50    1.88
   2   8   1   21.90    0.89
   2   8   1   20.83    1.25
   2   8   1   21.24    0.95
  -2  -8  -1   21.62    0.99
  -2  -8  -1   20.09    1.15
  -2  -8  -1   20.05    1.02
  -2  -8  -1   19.98    1.01
   2   7   1   52.00    2.12
   2   7   1   58.22    1.83
   2   7   1   58.14    1.87
  -2  -7  -1   55.42    2.08
  -2  -7  -1   56.65    1.95
  -2  -7  -1   55.69    1.94
  -2  -7  -1   55.75    1.90
   2   6   1   14.93    0.68
   2   6   1   12.80    0.81
  -2  -6  -1   13.27    0.68
  -2  -6  -1   14.71    0.66
  -2  -6  -1   14.87    0.81
   2   5   1    1.30    0.21
   2   5   1    1.59    0.30
  -2  -5  -1    1.38    0.24
  -2  -5  -1    1.27    0.21
  -2  -5  -1    1.27    0.28
   2   4   1    2.90    0.15
   2   4   1    2.77    0.22
   2   4   1    3.75    0.35
  -2  -4  -1    2.66    0.24
  -2  -4  -1    2.73    0.23
  -2  -4  -1    2.83    0.33
  -2  -4  -1    2.78    0.30
   2   3   1    1.00    0.20
   2   3   1    0.21    0.09
   2   3   1    0.40    0.15
   2   3   1    0.50    0.13
  -2  -3  -1    0.24    0.11
  -2  -3  -1    0.86    0.19
  -2  -3  -1    0.13    0.09
   2   2   1    0.05    0.04
   2   2   1    0.04    0.08
   2   2   1    0.08    0.06
   2   2   1    0.10    0.06
   2   2   1    0.09    0.08
  -2  -2  -1    0.02    0.05
  -2  -2  -1    0.19    0.09
  -2  -2  -1    0.03    0.06
  -2  -2  -1    0.07    0.07
  -2  -2  -1    0.09    0.05
  -2  -2  -1    0.47    0.14
   2   1   1  194.57    5.41
   2   1   1  202.09    5.42
   2   1   1  194.71    5.35
   2   1   1  188.54    5.16
   2   1   1  189.17    5.34
  -2  -1  -1  192.10    5.42
  -2  -1  -1  194.62    5.16
  -2  -1  -1  192.63    5.34
  -2  -1  -1  191.29    5.34
   2   0   1  229.10    6.38
   2   0   1  226.36    6.37
   2   0   1  232.25    6.30
   2   0   1  228.60    6.29
   2   0   1  226.60    6.24
  -2   0  -1  230.10    5.88
  -2   0  -1  228.85    6.38
  -2   0  -1  234.76    6.30
  -2   0  -1  223.49    6.38
  -2   0  -1  220.39    6.32
  -2   0  -1  224.93    6.29
   2  -1   1  199.24    5.43
   2  -1   1  193.93    5.52
   2  -1   1  215.45    5.53
   2  -1   1  194.36    5.31
  -2   1  -1  191.31    5.60
  -2   1  -1  199.54    5.53
  -2   1  -1  186.14    5.51
  -2   1  -1  189.43    5.42
  -2   1  -1  188.29    5.30
   2  -2   1    0.04    0.09
   2  -2   1    0.05    0.06
   2  -2   1    0.09    0.08
  -2   2  -1    0.04    0.07
  -2   2  -1    0.13    0.09
  -2   2  -1    0.13    0.08
  -2   2  -1    0.06    0.06
  -2   3  -1    0.77    0.20
   2  -4   1    2.52    0.30
   2  -4   1    2.88    0.19
  -2   4  -1    3.19    0.18
  -2   4  -1    2.71    0.26
  -2   4  -1    3.02    0.22
   2  -5   1    1.21    0.27
   2  -5   1    1.53    0.16
   2  -5   1    1.35    0.30
  -2   5  -1    1.51    0.24
  -2   5  -1    1.64    0.18
   2  -6   1   14.36    0.78
   2  -6   1   15.14    0.83
  -2   6  -1   15.17    0.73
  -2   6  -1   14.79    0.46
  -2   6  -1   14.00    0.56
   2  -7   1   53.69    2.01
   2  -7   1   53.80    2.06
  -2   7  -1   55.36    1.93
  -2   7  -1   56.92    1.69
   2  -8   1   20.81    1.11
   2  -8   1   21.86    1.21
  -2   8  -1   19.40    0.99
  -2   8  -1   19.69    0.73
   2  -9   1   42.81    1.82
   2  -9   1   45.50    1.96
  -2   9  -1   42.28    2.03
  -2   9  -1   44.81    1.71
  -2   9  -1   43.04    1.32
   2 -10   1    0.57    0.37
   2 -10   1    0.43    0.31
  -2  10  -1    0.29    0.35
   2 -11   1    0.07    0.31
  -2  11  -1   -0.39    0.30
   2 -12   1    0.30    0.36
  -2  12  -1    0.22    0.46
   2 -13   1    0.10    0.36
  -2  13  -1   -0.65    0.33
  -1 -13  -1   -0.25    0.29
   1  12   1    3.65    0.80
  -1 -12  -1    2.45    0.64
   1  11   1    0.14    0.36
  -1 -11  -1    0.53    0.31
   1  10   1   23.62    1.43
  -1 -10  -1   22.41    1.04
  -1 -10  -1   22.78    1.39
  -1 -10  -1   24.51    1.24
   1   9   1   24.06    1.43
  -1  -9  -1   25.71    1.25
  -1  -9  -1   25.40    1.11
  -1  -9  -1   25.61    1.38
   1   8   1   60.87    2.08
   1   8   1   59.13    2.44
  -1  -8  -1   63.02    2.36
  -1  -8  -1   65.47    2.14
  -1  -8  -1   62.03    2.23
   1   7   1    2.70    0.53
   1   7   1    3.19    0.35
   1   7   1    2.89    0.34
  -1  -7  -1    3.67    0.45
  -1  -7  -1    2.33    0.35
  -1  -7  -1    2.87    0.49
   1   6   1    0.93    0.22
   1   6   1    0.10    0.24
   1   6   1   -0.05    0.16
  -1  -6  -1    1.24    0.32
  -1  -6  -1    0.59    0.19
  -1  -6  -1    0.43    0.16
   1   5   1    3.09    0.27
   1   5   1    2.95    0.37
  -1  -5  -1    1.89    0.32
  -1  -5  -1    2.75    0.30
   1   4   1   38.90    1.25
   1   4   1   39.83    1.29
   1   4   1   37.42    1.41
  -1  -4  -1   40.09    1.37
  -1  -4  -1   38.18    1.30
   1   3   1  104.20    3.00
   1   3   1  104.81    3.09
  -1  -3  -1  101.06    2.72
  -1  -3  -1  103.26    3.02
  -1  -3  -1  102.12    2.97
  -1  -3  -1  103.44    3.10
   1   2   1   81.78    2.32
   1   2   1   80.91    2.22
   1   2   1   79.99    2.37
   1   2   1   82.34    2.33
  -1  -2  -1   79.21    2.28
  -1  -2  -1   80.44    2.13
  -1  -2  -1   80.92    2.38
  -1  -2  -1   78.10    2.33
  -1  -2  -1   79.67    2.22
   1   1   1   40.40    1.16
   1   1   1   39.67    1.21
   1   1   1   41.25    1.20
   1   1   1   41.87    1.20
  -1  -1  -1   41.39    1.16
  -1  -1  -1   38.82    1.21
  -1  -1  -1   41.60    1.21
  -1  -1  -1   41.49    1.16
   1   0   1  249.62    6.86
   1   0   1  251.38    6.83
   1   0   1  239.30    6.31
   1   0   1  245.30    6.97
  -1   0  -1  246.09    6.95
  -1   0  -1  244.39    6.41
  -1   0  -1  253.05    6.88
   1  -1   1   42.59    1.25
   1  -1   1   40.42    1.18
   1  -1   1   40.81    1.22
   1  -1   1   42.20    1.25
  -1   1  -1   42.85    1.26
  -1   1  -1   41.63    1.25
  -1   1  -1   41.02    1.22
  -1   1  -1   41.48    1.18
  -1   1  -1   43.06    1.25
   1  -2   1   81.79    2.37
   1  -2   1   73.04    2.34
  -1   2  -1   83.41    2.38
  -1   2  -1   78.52    2.28
  -1   2  -1   84.76    2.36
   1  -3   1  100.74    2.87
   1  -3   1  117.91    3.13
   1  -3   1  102.35    3.11
   1  -3   1   99.99    3.03
  -1   3  -1  106.95    3.12
  -1   3  -1  103.57    2.98
  -1   3  -1  108.28    3.06
  -1   3  -1  105.07    3.09
   1  -4   1   38.18    1.32
   1  -4   1   37.71    1.35
  -1   4  -1   38.55    1.28
  -1   4  -1   38.73    1.17
   1  -5   1    2.72    0.36
   1  -5   1    2.66    0.31
  -1   5  -1    2.69    0.19
  -1   5  -1    3.24    0.28
   1  -6   1    0.36    0.21
   1  -6   1    0.49    0.23
  -1   6  -1    0.33    0.18
  -1   6  -1    0.84    0.15
   1  -7   1    3.74    0.53
   1  -7   1    3.22    0.46
  -1   7  -1    2.09    0.23
  -1   7  -1    2.32    0.36
   1  -8   1   78.23    2.63
   1  -8   1   64.80    2.43
  -1   8  -1   81.71    2.39
  -1   8  -1   65.53    1.98
  -1   8  -1   56.03    2.59
   1  -9   1   25.73    1.26
   1  -9   1   25.84    1.39
  -1   9  -1   24.63    1.12
  -1   9  -1   22.64    1.44
   1 -10   1   25.99    1.44
   1 -10   1   22.60    1.22
  -1  10  -1   23.62    1.47
   1 -11   1    0.01    0.29
  -1  11  -1    0.29    0.36
   1 -12   1    3.20    0.69
  -1  12  -1    3.31    0.82
   1 -13   1    0.03    0.34
   0 -13  -1    2.07    0.53
   0  12   1   -0.11    0.37
   0 -12  -1   -0.29    0.30
   0  11   1   20.34    1.45
   0 -11  -1   21.71    1.26
   0  10   1    0.33    0.36
   0 -10  -1    0.11    0.26
   0 -10  -1   -0.25    0.23
   0   9   1  114.03    4.12
   0   9   1  117.28    3.76
   0  -9  -1  122.92    3.69
   0  -9  -1  121.93    4.03
   0  -9  -1  123.52    3.94
   0  -9  -1  117.70    4.00
   0   8   1   -0.94    0.34
   0  -8  -1    0.01    0.28
   0  -8  -1   -0.51    0.19
   0  -8  -1    0.72    0.32
   0  -8  -1    0.68    0.39
   0   7   1  239.59    7.34
   0   7   1  280.07    7.18
   0  -7  -1  236.50    7.09
   0  -7  -1  235.37    7.23
   0  -7  -1  241.50    7.13
   0  -7  -1  238.77    7.22
   0   6   1    0.00    0.17
   0  -6  -1   -0.13    0.11
   0  -6  -1    0.07    0.18
   0  -6  -1    0.16    0.16
   0  -6  -1   -0.05    0.16
   0   5   1    5.93    0.50
   0   5   1    5.73    0.34
   0  -5  -1    5.22    0.40
   0  -5  -1    5.49    0.32
   0  -5  -1    5.11    0.38
   0  -5  -1    5.52    0.45
   0   4   1   -0.19    0.07
   0   4   1   -0.12    0.13
   0  -4  -1   -0.18    0.09
   0  -4  -1   -0.15    0.08
   0   3   1  518.46   14.10
   0   3   1  520.87   13.80
   0   3   1  493.98   13.94
   0  -3  -1  496.77   14.22
   0  -3  -1  495.61   14.09
   0   2   1    0.04    0.08
   0   2   1    0.14    0.07
   0   2   1    0.02    0.05
   0  -2  -1    0.01    0.06
   0  -2  -1   -0.01    0.06
   0  -2  -1    0.05    0.06
   0   1   1  824.04   22.93
   0   1   1  804.71   22.62
   0   1   1  842.40   22.13
   0   1   1  840.81   23.01
   0  -1  -1  814.61   22.98
   0  -1  -1  808.67   22.14
   0  -1  -1  823.51   22.93
   0  -1  -1  821.06   22.61
   0   0  -1   -0.58    0.01
   0  -1   1  803.35   26.16
   0  -1   1  830.33   22.05
   0  -1   1  814.34   23.85
   0   1  -1  853.51   25.83
   0   1  -1  819.50   23.85
   0   1  -1  822.14   22.06
   0   1  -1  856.43   26.35
   0  -2   1   -0.02    0.02
   0  -2   1   -0.01    0.07
   0  -2   1   -0.07    0.04
   0  -2   1   -0.02    0.04
   0   2  -1    0.03    0.04
   0   2  -1   -0.09    0.04
   0   2  -1    0.00    0.04
   0   2  -1    0.05    0.07
   0  -3   1  494.92   14.14
   0  -3   1  520.91   14.30
   0   3  -1  516.41   14.13
   0   3  -1  486.35   14.08
   0   3  -1  508.17   13.60
   0  -4   1   -0.08    0.07
   0  -4   1   -0.24    0.11
   0  -4   1   -0.12    0.09
   0   4  -1   -0.24    0.05
   0   4  -1   -0.20    0.08
   0   4  -1   -0.14    0.07
   0  -5   1    5.92    0.34
   0  -5   1    5.78    0.40
   0  -5   1    5.57    0.46
   0   5  -1    5.46    0.28
   0   5  -1    5.52    0.26
   0   5  -1    5.28    0.33
   0  -6   1   -0.51    0.13
   0  -6   1   -0.03    0.17
   0  -6   1    0.01    0.19
   0   6  -1   -0.46    0.11
   0   6  -1   -0.06    0.04
   0   6  -1    0.09    0.06
   0  -7   1  245.16    7.00
   0  -7   1  242.14    7.04
   0  -7   1  243.33    6.97
   0   7  -1  233.08    7.19
   0   7  -1  232.30    6.91
   0   7  -1  241.89    6.61
   0  -8   1    0.56    0.35
   0  -8   1   -0.40    0.30
   0   8  -1   -1.04    0.38
   0   8  -1   -0.89    0.22
   0  -9   1  123.05    3.96
   0  -9   1  116.08    3.77
   0   9  -1  115.31    3.68
   0   9  -1  110.45    4.03
   0 -10   1   -0.02    0.31
   0 -10   1   -0.20    0.21
   0  10  -1    0.27    0.35
   0 -11   1   20.97    1.19
   0  11  -1   22.13    1.48
   0 -12   1   -0.32    0.27
   0  12  -1    0.64    0.46
   0 -13   1    1.55    0.46
   1 -13  -1    0.09    0.37
  -1  12   1    4.09    0.88
   1 -12  -1    2.51    0.64
  -1  11   1   -0.03    0.34
   1 -11  -1    0.21    0.33
  -1  10   1   22.17    1.42
   1 -10  -1   23.48    1.38
   1 -10  -1   22.93    1.26
  -1   9   1   25.29    1.18
  -1   9   1   22.72    1.43
   1  -9  -1   25.95    1.31
   1  -9  -1   26.07    1.45
   1  -9  -1   26.89    1.27
  -1   8   1   61.69    2.49
  -1   8   1   56.74    2.16
   1  -8  -1   65.23    2.33
   1  -8  -1   65.64    2.30
   1  -8  -1   66.01    2.42
  -1   7   1    2.12    0.51
  -1   7   1    3.35    0.39
   1  -7  -1    3.04    0.49
   1  -7  -1    3.07    0.46
   1  -7  -1    3.04    0.42
   1  -7  -1    2.39    0.28
  -1   6   1    0.30    0.16
  -1   6   1    1.24    0.36
   1  -6  -1    0.71    0.17
   1  -6  -1    0.44    0.26
   1  -6  -1    0.66    0.21
  -1   5   1    2.26    0.37
   1  -5  -1    2.72    0.20
   1  -5  -1    2.60    0.31
   1  -5  -1    3.14    0.26
  -1   4   1   40.31    1.16
  -1   4   1   37.64    1.45
   1  -4  -1   40.58    1.41
   1  -4  -1   40.48    1.23
   1  -4  -1   41.49    1.27
  -1   3   1  102.89    3.05
  -1   3   1  104.08    2.84
   1  -3  -1  101.87    2.87
   1  -3  -1   98.00    3.05
   1  -3  -1  102.55    2.84
  -1   2   1   80.81    2.25
  -1   2   1   82.50    2.41
   1  -2  -1   78.99    2.40
   1  -2  -1   79.21    2.25
   1  -2  -1   81.57    2.12
  -1   1   1   41.88    1.25
   1  -1  -1   41.18    1.18
   1  -1  -1   40.02    1.25
  -1   0   1  279.69    7.62
   1   0  -1  255.64    7.22
   1   0  -1  253.71    7.29
   1   0  -1  279.15    7.63
   1   0  -1  260.93    7.49
  -1  -1   1   41.70    1.22
  -1  -1   1   41.81    1.28
  -1  -1   1   41.99    1.31
   1   1  -1   42.77    1.22
   1   1  -1   42.95    1.31
   1   1  -1   42.29    1.28
  -1  -2   1   75.05    2.23
  -1  -2   1   80.19    2.27
  -1  -2   1   81.42    2.36
  -1  -2   1   77.37    2.24
   1   2  -1   78.87    2.27
   1   2  -1   81.46    2.22
   1   2  -1   80.86    2.23
  -1  -3   1  103.15    2.98
  -1  -3   1  101.45    2.99
  -1  -3   1  107.00    3.09
   1   3  -1  100.11    3.00
   1   3  -1  103.62    2.94
   1   3  -1  106.83    2.96
  -1  -4   1   40.25    1.33
  -1  -4   1   37.50    1.37
  -1  -4   1   39.51    1.28
   1   4  -1   39.44    1.22
   1   4  -1   40.49    1.25
   1   4  -1   40.13    1.39
  -1  -5   1    2.70    0.26
  -1  -5   1    2.91    0.35
  -1  -5   1    2.91    0.27
   1   5  -1    3.08    0.23
   1   5  -1    2.66    0.21
   1   5  -1    2.21    0.34
  -1  -6   1    0.96    0.25
  -1  -6   1    0.53    0.17
  -1  -6   1    0.42    0.23
   1   6  -1    0.74    0.17
   1   6  -1    0.56    0.16
   1   6  -1    0.50    0.26
   1   6  -1    0.97    0.11
  -1  -7   1    3.18    0.41
  -1  -7   1    3.11    0.48
  -1  -7   1    2.87    0.37
   1   7  -1    2.90    0.52
   1   7  -1    3.45    0.31
   1   7  -1    2.79    0.18
   1   7  -1    2.90    0.29
  -1  -8   1   62.85    2.19
  -1  -8   1   63.75    2.42
  -1  -8   1   64.72    2.20
  -1  -8   1   63.23    2.23
   1   8  -1   59.63    2.47
   1   8  -1   69.00    2.09
  -1  -9   1   27.45    1.24
  -1  -9   1   28.10    1.44
  -1  -9   1   26.34    1.18
   1   9  -1   23.76    1.44
  -1 -10   1   25.22    1.42
  -1 -10   1   23.20    1.17
   1  10  -1   23.37    1.44
  -1 -11   1    0.16    0.27
   1  11  -1    0.27    0.36
  -1 -12   1    3.47    0.63
   1  12  -1    3.67    0.78
  -1 -13   1   -0.44    0.28
   2 -13  -1   -0.21    0.32
  -2  12   1    0.28    0.43
   2 -12  -1    0.02    0.33
  -2  11   1   -0.10    0.34
   2 -11  -1    0.20    0.33
  -2  10   1    0.04    0.31
   2 -10  -1    0.38    0.31
   2 -10  -1   -0.52    0.27
  -2   9   1   50.46    1.92
  -2   9   1   46.09    2.15
   2  -9  -1   51.24    2.15
   2  -9  -1   47.26    2.08
   2  -9  -1   50.11    2.04
  -2   8   1   22.14    1.07
  -2   8   1   19.75    1.25
   2  -8  -1   20.55    1.14
   2  -8  -1   20.93    1.21
   2  -8  -1   21.60    1.12
  -2   7   1   53.02    2.18
  -2   7   1   62.31    2.05
   2  -7  -1   54.37    2.07
  -2   6   1   12.82    0.72
  -2   6   1   14.84    0.52
  -2   6   1   13.83    0.86
   2  -6  -1   14.00    0.78
   2  -6  -1   15.10    0.64
  -2   5   1    1.43    0.15
  -2   5   1    1.13    0.24
   2  -5  -1    1.80    0.22
   2  -5  -1    1.60    0.15
   2  -5  -1    1.20    0.30
  -2   4   1    2.98    0.19
   2  -4  -1    3.20    0.20
   2  -4  -1    2.64    0.32
   2  -4  -1    2.86    0.24
   2  -3  -1    1.33    0.26
  -2   2   1    0.06    0.09
  -2   2   1    0.11    0.06
  -2   2   1    0.08    0.09
   2  -2  -1    0.09    0.05
   2  -2  -1    0.07    0.05
   2  -2  -1   -0.05    0.08
  -2   1   1  199.74    5.59
  -2   1   1  194.84    5.59
  -2   1   1  195.65    5.45
  -2   1   1  196.47    5.39
   2  -1  -1  192.96    5.45
   2  -1  -1  199.31    5.40
   2  -1  -1  201.46    5.59
   2  -1  -1  194.29    5.17
  -2   0   1  241.47    6.38
  -2   0   1  222.31    6.29
  -2   0   1  243.75    6.59
  -2   0   1  224.06    6.66
  -2   0   1  239.08    6.50
   2   0  -1  228.11    6.37
   2   0  -1  237.41    6.50
   2   0  -1  226.85    6.29
   2   0  -1  228.16    6.41
  -2  -1   1  199.96    5.43
  -2  -1   1  191.27    5.68
  -2  -1   1  195.86    5.37
   2   1  -1  191.16    5.36
   2   1  -1  195.00    5.68
   2   1  -1  195.40    5.42
   2   1  -1  195.73    5.44
   2   1  -1  199.44    5.41
  -2  -2   1    0.03    0.08
   2   2  -1    0.14    0.09
   2   2  -1    0.12    0.08
  -2  -3   1    0.21    0.07
  -2  -3   1    0.54    0.16
  -2  -4   1    3.00    0.28
  -2  -4   1    2.74    0.21
  -2  -4   1    3.14    0.32
   2   4  -1    2.54    0.30
   2   4  -1    2.75    0.15
   2   4  -1    3.17    0.34
   2   4  -1    2.86    0.19
   2   4  -1    2.84    0.16
  -2  -5   1    1.66    0.25
  -2  -5   1    1.55    0.31
  -2  -5   1    1.63    0.22
   2   5  -1    1.64    0.14
   2   5  -1    1.44    0.29
   2   5  -1    1.18    0.28
   2   5  -1    1.55    0.15
  -2  -6   1   15.23    0.64
  -2  -6   1   14.67    0.73
  -2  -6   1   14.37    0.66
  -2  -6   1   15.80    0.84
   2   6  -1   14.03    0.51
   2   6  -1   14.83    0.56
   2   6  -1   14.49    0.84
  -2  -7   1   55.65    1.88
  -2  -7   1   55.02    1.95
  -2  -7   1   57.65    2.10
  -2  -7   1   55.45    1.85
   2   7  -1   56.16    1.63
   2   7  -1   54.93    1.57
   2   7  -1   57.42    1.74
   2   7  -1   52.63    2.12
   2   7  -1   57.01    1.78
  -2  -8   1   20.74    1.01
  -2  -8   1   21.82    0.99
  -2  -8   1   21.29    0.95
  -2  -8   1   21.79    1.20
   2   8  -1   21.14    0.82
   2   8  -1   20.02    1.22
   2   8  -1   19.93    0.87
  -2  -9   1   46.71    1.74
  -2  -9   1   43.69    1.69
  -2  -9   1   46.56    1.98
  -2  -9   1   42.96    1.64
   2   9  -1   41.98    1.98
   2   9  -1   45.78    1.54
  -2 -10   1    0.74    0.26
  -2 -10   1   -0.15    0.20
  -2 -10   1    0.17    0.32
   2  10  -1    0.41    0.34
  -2 -11   1    0.03    0.25
   2  11  -1    0.29    0.36
  -2 -12   1    0.24    0.28
   2  12  -1   -0.23    0.34
  -2 -13   1   -0.36    0.28
  -3  13   1   -0.13    0.36
   3 -13  -1    0.13    0.37
  -3  12   1   -0.50    0.36
  -3  12   1   -0.41    0.39
   3 -12  -1   -0.11    0.36
  -3  11   1    4.43    0.83
   3 -11  -1    3.61    0.74
  -3  10   1    8.44    0.91
   3 -10  -1    8.02    0.81
   3 -10  -1    8.27    0.86
  -3   9   1   12.87    0.85
  -3   9   1   11.60    1.03
   3  -9  -1   13.65    1.01
   3  -9  -1   14.07    0.98
  -3   8   1    8.54    0.85
  -3   8   1   10.46    0.73
   3  -8  -1    8.22    0.82
   3  -8  -1    9.65    0.80
  -3   7   1    1.78    0.45
  -3   7   1    1.31    0.35
   3  -7  -1    1.88    0.44
   3  -7  -1    2.16    0.28
  -3   6   1    0.47    0.19
  -3   6   1    0.39    0.10
   3  -6  -1    0.53    0.23
   3  -6  -1    0.26    0.15
   3  -6  -1    0.32    0.10
  -3   5   1    2.66    0.22
  -3   5   1    2.20    0.32
   3  -5  -1    2.28    0.34
   3  -5  -1    2.67    0.22
  -3   4   1   17.92    0.78
  -3   4   1   16.70    0.63
  -3   4   1   16.53    0.77
   3  -4  -1   16.93    0.64
   3  -4  -1   17.75    0.82
  -3   3   1   17.19    0.65
  -3   3   1   18.46    0.80
  -3   3   1   19.42    0.77
   3  -3  -1   18.16    0.60
   3  -3  -1   17.98    0.79
   3  -3  -1   18.96    0.67
  -3   2   1   33.92    1.16
  -3   2   1   35.10    1.06
  -3   2   1   35.50    1.06
  -3   2   1   36.56    1.25
  -3   2   1   35.85    1.13
   3  -2  -1   34.93    1.13
   3  -2  -1   37.44    1.20
   3  -2  -1   35.15    1.23
   3  -2  -1   33.58    1.05
  -3   1   1    3.95    0.27
  -3   1   1    3.69    0.22
  -3   1   1    4.06    0.25
   3  -1  -1    3.65    0.23
   3  -1  -1    3.67    0.21
   3  -1  -1    4.14    0.26
   3  -1  -1    3.75    0.26
  -3   0   1   80.07    2.34
  -3   0   1   84.92    2.40
  -3   0   1   83.37    2.38
  -3   0   1   84.93    2.42
  -3   0   1   81.17    2.43
  -3   0   1   79.19    2.27
   3   0  -1   83.95    2.40
   3   0  -1   82.69    2.27
   3   0  -1   83.57    2.41
   3   0  -1   80.76    2.34
   3   0  -1   80.41    2.37
  -3  -1   1    3.79    0.24
  -3  -1   1    3.63    0.19
  -3  -1   1    3.90    0.19
  -3  -1   1    3.97    0.25
  -3  -1   1    3.79    0.19
   3   1  -1    3.91    0.23
   3   1  -1    3.77    0.24
   3   1  -1    3.78    0.23
   3   1  -1    4.14    0.24
   3   1  -1    3.86    0.18
   3   1  -1    3.76    0.18
  -3  -2   1   35.15    1.01
  -3  -2   1   34.39    1.13
  -3  -2   1   34.98    1.01
   3   2  -1   35.19    1.07
   3   2  -1   34.31    1.14
   3   2  -1   35.14    1.11
   3   2  -1   36.34    1.22
   3   2  -1   33.77    1.11
  -3  -3   1   19.01    0.75
  -3  -3   1   18.25    0.57
  -3  -3   1   18.79    0.58
   3   3  -1   17.81    0.75
   3   3  -1   18.18    0.66
   3   3  -1   18.93    0.65
   3   3  -1   19.56    0.76
  -3  -4   1   16.58    0.76
  -3  -4   1   16.59    0.76
  -3  -4   1   16.84    0.57
  -3  -4   1   16.97    0.58
   3   4  -1   16.11    0.60
   3   4  -1   17.45    0.62
   3   4  -1   16.27    0.77
   3   4  -1   16.76    0.77
  -3  -5   1    2.36    0.21
  -3  -5   1    2.66    0.32
  -3  -5   1    2.39    0.22
  -3  -5   1    2.65    0.38
   3   5  -1    2.38    0.34
   3   5  -1    2.53    0.21
   3   5  -1    2.48    0.21
   3   5  -1    2.29    0.34
  -3  -6   1    0.25    0.12
  -3  -6   1    0.19    0.19
  -3  -6   1    0.13    0.11
  -3  -6   1    0.20    0.16
   3   6  -1    0.33    0.09
   3   6  -1    0.25    0.06
   3   6  -1    0.16    0.19
   3   6  -1    0.14    0.19
   3   6  -1    0.56    0.15
  -3  -7   1    1.67    0.27
  -3  -7   1    2.41    0.43
  -3  -7   1    1.91    0.37
  -3  -7   1    1.67    0.31
   3   7  -1    1.41    0.18
   3   7  -1    1.81    0.49
   3   7  -1    2.07    0.21
  -3  -8   1    9.38    0.59
  -3  -8   1   10.16    0.81
  -3  -8   1    9.70    0.68
  -3  -8   1    9.89    0.57
   3   8  -1    9.57    0.37
   3   8  -1    8.29    0.57
   3   8  -1    9.12    0.82
  -3  -9   1   13.94    0.74
  -3  -9   1   14.60    0.85
  -3  -9   1   13.49    0.97
  -3  -9   1   13.90    0.77
   3   9  -1   14.37    1.03
   3   9  -1   13.36    0.71
  -3 -10   1    8.73    0.85
  -3 -10   1    8.96    0.65
  -3 -10   1    7.77    0.68
   3  10  -1    8.42    0.87
  -3 -11   1    4.22    0.57
  -3 -11   1    4.20    0.59
   3  11  -1    3.07    0.69
  -3 -12   1   -0.42    0.24
   3  12  -1   -0.47    0.32
  -3 -13   1   -0.68    0.24
  -4  13   1    3.84    0.82
   4 -13  -1    1.45    0.54
  -4  12   1   26.38    1.75
  -4  12   1   22.19    1.47
   4 -12  -1   21.14    1.45
  -4  11   1    3.45    0.79
  -4  11   1    2.88    0.62
   4 -11  -1    1.85    0.52
  -4  10   1    0.77    0.36
  -4  10   1    1.27    0.45
   4 -10  -1    0.85    0.38
   4 -10  -1    0.41    0.32
  -4   9   1    2.67    0.59
  -4   9   1    3.54    0.52
  -4   9   1    2.84    0.63
   4  -9  -1    2.43    0.58
   4  -9  -1    2.57    0.59
  -4   8   1   26.87    1.32
  -4   8   1   27.00    1.28
  -4   8   1   27.20    1.46
   4  -8  -1   24.53    1.30
   4  -8  -1   26.45    1.04
  -4   7   1    6.81    0.59
  -4   7   1    7.57    0.44
  -4   7   1    8.69    0.67
   4  -7  -1    8.18    0.50
   4  -7  -1    8.13    0.68
  -4   6   1    1.36    0.22
  -4   6   1    1.17    0.29
  -4   6   1    0.46    0.22
   4  -6  -1    1.74    0.41
   4  -6  -1    1.76    0.24
  -4   5   1    9.63    0.65
  -4   5   1   10.00    0.49
  -4   5   1   12.48    0.70
   4  -5  -1    9.06    0.67
   4  -5  -1   10.24    0.50
  -4   4   1  200.00    5.70
  -4   4   1  210.80    5.97
  -4   4   1  199.74    5.75
   4  -4  -1  203.99    5.70
   4  -4  -1  191.30    5.96
  -4   3   1    8.57    0.50
  -4   3   1    7.34    0.39
  -4   3   1    7.26    0.35
  -4   3   1    7.54    0.46
  -4   3   1    7.45    0.28
  -4   3   1    7.23    0.49
   4  -3  -1    6.60    0.38
   4  -3  -1    6.74    0.47
   4  -3  -1    7.23    0.35
  -4   2   1   25.86    0.89
  -4   2   1   25.09    0.95
  -4   2   1   23.48    0.96
  -4   2   1   25.70    0.82
  -4   2   1   23.74    0.90
   4  -2  -1   22.50    0.90
   4  -2  -1   26.28    0.89
   4  -2  -1   24.30    0.96
   4  -2  -1   24.68    0.82
  -4   1   1   77.49    2.31
  -4   1   1   65.88    2.33
  -4   1   1   81.41    2.32
  -4   1   1   79.53    2.28
  -4   1   1   79.72    2.39
   4  -1  -1   76.52    2.29
   4  -1  -1   75.28    2.36
   4  -1  -1   79.34    2.31
   4  -1  -1   78.03    2.19
  -4   0   1   76.10    2.20
  -4   0   1   72.49    2.18
  -4   0   1   66.14    2.17
  -4   0   1   67.68    2.03
  -4   0   1   77.61    2.09
  -4   0   1   71.02    2.17
  -4   0   1   68.66    2.13
  -4   0   1   74.71    2.17
   4   0  -1   74.16    2.08
   4   0  -1   70.95    2.18
   4   0  -1   75.72    2.17
   4   0  -1   72.81    2.14
   4   0  -1   75.08    2.19
   4   0  -1   70.25    2.16
  -4  -1   1   73.42    2.30
  -4  -1   1   81.22    2.32
  -4  -1   1   76.57    1.97
  -4  -1   1   78.19    2.26
  -4  -1   1   74.32    2.19
  -4  -1   1   75.62    2.37
   4   1  -1   79.40    2.31
   4   1  -1   74.64    2.29
   4   1  -1   76.91    2.18
   4   1  -1   75.84    2.19
   4   1  -1   79.38    2.37
   4   1  -1   78.32    2.25
  -4  -2   1   25.05    0.86
  -4  -2   1   24.57    0.79
  -4  -2   1   25.84    0.79
   4   2  -1   25.21    0.75
   4   2  -1   24.61    0.88
   4   2  -1   24.87    0.85
   4   2  -1   25.17    0.95
   4   2  -1   25.26    0.93
   4   2  -1   24.97    0.90
   4   2  -1   25.91    0.86
  -4  -3   1    7.45    0.29
  -4  -3   1    7.25    0.28
  -4  -3   1    7.73    0.44
  -4  -3   1    8.19    0.45
   4   3  -1    7.34    0.37
   4   3  -1    7.69    0.42
   4   3  -1    7.64    0.45
   4   3  -1    7.43    0.46
   4   3  -1    7.54    0.38
  -4  -4   1  194.33    5.54
  -4  -4   1  202.29    5.59
  -4  -4   1  196.44    5.55
   4   4  -1  193.00    5.60
   4   4  -1  202.49    5.60
   4   4  -1  198.17    5.34
   4   4  -1  200.16    5.72
  -4  -5   1    9.17    0.60
  -4  -5   1    9.89    0.40
  -4  -5   1   10.16    0.63
  -4  -5   1    9.73    0.42
   4   5  -1    9.42    0.61
   4   5  -1    9.48    0.47
   4   5  -1   10.10    0.46
   4   5  -1    9.64    0.63
  -4  -6   1    1.55    0.20
  -4  -6   1    1.42    0.22
  -4  -6   1    1.74    0.35
  -4  -6   1    1.03    0.28
   4   6  -1    1.53    0.34
   4   6  -1    1.13    0.20
   4   6  -1    1.30    0.19
   4   6  -1    1.52    0.35
  -4  -7   1    7.73    0.44
  -4  -7   1    7.91    0.47
  -4  -7   1    8.20    0.67
  -4  -7   1    8.16    0.63
   4   7  -1    7.32    0.66
   4   7  -1    8.43    0.43
   4   7  -1    8.07    0.40
  -4  -8   1   26.50    1.05
  -4  -8   1   27.56    1.34
  -4  -8   1   25.63    1.23
  -4  -8   1   26.43    1.01
   4   8  -1   26.95    0.88
   4   8  -1   24.75    1.32
  -4  -9   1    2.93    0.49
  -4  -9   1    3.07    0.63
  -4  -9   1    2.81    0.34
  -4  -9   1    2.79    0.40
   4   9  -1    2.53    0.37
   4   9  -1    2.02    0.52
  -4 -10   1    0.18    0.31
  -4 -10   1    0.83    0.26
  -4 -10   1    0.84    0.30
   4  10  -1    0.51    0.35
  -4 -11   1    1.44    0.34
  -4 -11   1    2.33    0.58
   4  11  -1    2.62    0.63
  -4 -12   1   21.55    1.13
   4  12  -1   21.73    1.54
  -4 -13   1    2.15    0.57
  -5  13   1    0.93    0.47
   5 -13  -1    1.19    0.54
  -5  12   1    4.54    0.87
  -5  12   1    3.35    0.89
   5 -12  -1    4.77    0.81
  -5  11   1    0.94    0.43
  -5  11   1    0.96    0.53
   5 -11  -1    2.30    0.65
  -5  10   1    0.49    0.38
  -5  10   1    0.66    0.35
   5 -10  -1    0.88    0.39
   5 -10  -1    0.28    0.34
  -5   9   1    0.86    0.35
  -5   9   1    0.24    0.25
  -5   9   1   -0.27    0.24
   5  -9  -1    0.25    0.32
   5  -9  -1    0.25    0.19
  -5   8   1    3.81    0.59
  -5   8   1    4.19    0.54
  -5   8   1    5.12    0.39
   5  -8  -1    5.21    0.69
   5  -8  -1    4.59    0.43
  -5   7   1    0.13    0.22
  -5   7   1    0.20    0.13
  -5   7   1    0.29    0.23
   5  -7  -1   -0.02    0.13
   5  -7  -1    0.00    0.22
   5  -7  -1    0.44    0.19
  -5   6   1   14.60    0.87
  -5   6   1   15.41    0.87
  -5   6   1   15.93    0.70
   5  -6  -1   16.55    0.72
   5  -6  -1   15.63    0.92
  -5   5   1    1.76    0.26
  -5   5   1    1.30    0.33
  -5   5   1    0.48    0.23
   5  -5  -1    1.40    0.36
   5  -5  -1    1.35    0.24
  -5   4   1   71.95    2.04
  -5   4   1   73.54    2.07
  -5   4   1   69.87    2.21
  -5   4   1   68.46    2.28
   5  -4  -1   71.56    2.43
   5  -4  -1   71.04    2.22
  -5   3   1   21.21    0.88
  -5   3   1   22.07    0.85
  -5   3   1   21.96    0.99
  -5   3   1   21.98    0.78
  -5   3   1   20.53    0.93
   5  -3  -1   21.83    0.78
   5  -3  -1   22.31    0.85
   5  -3  -1   21.89    0.93
   5  -3  -1   21.43    0.96
  -5   2   1    1.84    0.23
  -5   2   1    1.81    0.21
  -5   2   1    1.94    0.26
  -5   2   1    1.78    0.25
  -5   2   1    1.73    0.27
   5  -2  -1    1.80    0.26
   5  -2  -1    1.30    0.20
   5  -2  -1    2.32    0.26
   5  -2  -1    1.51    0.20
  -5   1   1    9.71    0.48
  -5   1   1    9.49    0.45
  -5   1   1   10.38    0.54
  -5   1   1    8.27    0.47
  -5   1   1   10.15    0.49
  -5   1   1    9.41    0.47
   5  -1  -1    9.03    0.49
   5  -1  -1    8.94    0.48
   5  -1  -1    9.13    0.44
  -5   0   1   41.86    1.45
  -5   0   1   44.37    1.32
  -5   0   1   46.92    1.41
  -5   0   1   47.36    1.48
  -5   0   1   44.62    1.48
  -5   0   1   45.64    1.42
  -5   0   1   44.72    1.48
   5   0  -1   44.77    1.47
   5   0  -1   43.72    1.44
   5   0  -1   46.46    1.41
   5   0  -1   47.27    1.49
   5   0  -1   44.45    1.46
   5   0  -1   44.01    1.40
  -5  -1   1    9.01    0.43
  -5  -1   1   10.38    0.50
  -5  -1   1    9.61    0.46
  -5  -1   1    8.99    0.47
  -5  -1   1    9.08    0.37
   5   1  -1   10.06    0.48
   5   1  -1    9.41    0.36
   5   1  -1    9.77    0.46
   5   1  -1    8.79    0.46
   5   1  -1    9.61    0.42
   5   1  -1   10.01    0.45
  -5  -2   1    1.83    0.17
  -5  -2   1    1.67    0.16
  -5  -2   1    1.87    0.20
   5   2  -1    1.68    0.14
   5   2  -1    1.83    0.21
   5   2  -1    1.33    0.19
   5   2  -1    1.72    0.18
   5   2  -1    1.74    0.24
   5   2  -1    1.61    0.21
  -5  -3   1   23.53    0.87
  -5  -3   1   21.54    0.70
  -5  -3   1   21.39    0.71
   5   3  -1   21.58    0.80
   5   3  -1   20.42    0.82
   5   3  -1   21.80    0.87
   5   3  -1   20.84    0.82
   5   3  -1   22.49    0.93
   5   3  -1   21.35    0.90
  -5  -4   1   74.84    2.36
  -5  -4   1   71.34    2.29
  -5  -4   1   72.34    2.09
  -5  -4   1   71.77    2.11
   5   4  -1   70.86    2.14
   5   4  -1   74.12    2.33
   5   4  -1   69.08    2.29
   5   4  -1   74.14    2.23
  -5  -5   1    1.08    0.15
  -5  -5   1    0.81    0.23
  -5  -5   1    2.31    0.38
  -5  -5   1    1.34    0.18
   5   5  -1    1.49    0.34
   5   5  -1    1.05    0.22
   5   5  -1    0.78    0.20
   5   5  -1    1.04    0.27
  -5  -6   1   14.67    0.60
  -5  -6   1   15.19    0.57
  -5  -6   1   15.28    0.84
  -5  -6   1   15.18    0.85
   5   6  -1   15.79    0.66
   5   6  -1   15.91    0.65
   5   6  -1   13.88    0.84
   5   6  -1   14.89    0.86
  -5  -7   1    0.23    0.12
  -5  -7   1    0.20    0.23
  -5  -7   1    0.28    0.14
  -5  -7   1    0.14    0.25
   5   7  -1    0.22    0.21
   5   7  -1    0.10    0.10
   5   7  -1    0.16    0.14
   5   7  -1   -0.08    0.19
  -5  -8   1    5.80    0.67
  -5  -8   1    5.16    0.38
  -5  -8   1    4.59    0.40
  -5  -8   1    4.96    0.54
   5   8  -1    4.67    0.60
   5   8  -1    4.77    0.33
  -5  -9   1    0.21    0.24
  -5  -9   1    0.06    0.16
  -5  -9   1    0.16    0.15
  -5  -9   1   -0.13    0.24
   5   9  -1    0.09    0.09
   5   9  -1    0.30    0.26
  -5 -10   1    0.42    0.21
  -5 -10   1    0.58    0.38
  -5 -10   1    0.92    0.32
   5  10  -1    1.03    0.38
  -5 -11   1    0.76    0.27
  -5 -11   1    1.20    0.39
   5  11  -1    1.28    0.47
  -5 -12   1    3.77    0.56
  -5 -12   1    3.57    0.73
   5  12  -1    3.96    0.81
  -5 -13   1    1.11    0.35
  -6  13   1    1.65    0.54
   6 -13  -1    1.10    0.53
  -6  12   1   29.16    1.66
   6 -12  -1   27.18    1.73
  -6  11   1    1.37    0.57
  -6  11   1    4.20    0.75
   6 -11  -1    0.86    0.48
  -6  10   1    3.72    0.66
  -6  10   1    3.16    0.68
   6 -10  -1    3.32    0.66
   6 -10  -1    2.87    0.38
  -6   9   1    6.39    0.70
  -6   9   1    7.50    0.77
   6  -9  -1    8.51    0.83
   6  -9  -1    7.72    0.55
  -6   8   1    4.47    0.61
  -6   8   1    4.43    0.61
  -6   8   1    4.49    0.41
   6  -8  -1    4.22    0.43
   6  -8  -1    2.55    0.56
   6  -8  -1    3.69    0.39
  -6   7   1   19.71    1.11
  -6   7   1   20.52    0.89
  -6   7   1   21.80    1.11
   6  -7  -1   21.07    0.91
   6  -7  -1   19.10    1.12
  -6   6   1   10.69    0.73
  -6   6   1   12.83    0.81
  -6   6   1   10.38    0.59
   6  -6  -1   10.41    0.60
   6  -6  -1   10.78    0.78
  -6   5   1   20.37    1.07
  -6   5   1   21.90    1.02
  -6   5   1   20.45    0.89
   6  -5  -1   20.52    1.07
   6  -5  -1   20.75    0.90
  -6   4   1  421.70   11.95
  -6   4   1  428.97   12.08
  -6   4   1  450.60   11.44
  -6   4   1  451.67   12.19
  -6   4   1  405.31   12.37
   6  -4  -1  432.94   12.44
   6  -4  -1  435.11   12.09
  -6   3   1   10.73    0.61
  -6   3   1   13.34    0.71
  -6   3   1   11.05    0.59
  -6   3   1   11.56    0.56
   6  -3  -1   11.83    0.66
   6  -3  -1   11.39    0.69
   6  -3  -1   10.56    0.54
   6  -3  -1   11.71    0.61
  -6   2   1    0.38    0.13
  -6   2   1    0.33    0.18
  -6   2   1    0.67    0.16
  -6   2   1    0.89    0.25
  -6   2   1    0.60    0.18
   6  -2  -1    0.76    0.22
   6  -2  -1    0.50    0.15
   6  -2  -1    0.31    0.13
   6  -2  -1    0.57    0.18
  -6   1   1   12.99    0.58
  -6   1   1   12.26    0.61
  -6   1   1   13.30    0.62
  -6   1   1   12.99    0.48
  -6   1   1   12.87    0.61
  -6   1   1   12.65    0.66
  -6   1   1   13.47    0.64
   6  -1  -1   12.91    0.58
   6  -1  -1   12.71    0.64
   6  -1  -1   12.05    0.61
   6  -1  -1   12.98    0.63
  -6   0   1  168.02    4.90
  -6   0   1  157.34    4.83
  -6   0   1  168.32    4.90
  -6   0   1  173.45    4.62
  -6   0   1  172.20    4.83
  -6   0   1  164.11    4.87
  -6   0   1  162.33    4.64
   6   0  -1  168.44    4.85
   6   0  -1  160.67    4.81
   6   0  -1  170.43    4.61
   6   0  -1  166.64    4.75
   6   0  -1  164.34    4.87
   6   0  -1  172.55    4.89
  -6  -1   1   12.38    0.61
  -6  -1   1   13.28    0.58
  -6  -1   1   12.74    0.49
  -6  -1   1   13.32    0.58
  -6  -1   1   14.36    0.65
   6   1  -1   13.12    0.56
   6   1  -1   12.84    0.59
   6   1  -1   12.93    0.48
   6   1  -1   12.88    0.61
   6   1  -1   13.38    0.63
   6   1  -1   13.35    0.55
  -6  -2   1    1.08    0.23
  -6  -2   1    0.66    0.15
  -6  -2   1    0.54    0.15
  -6  -2   1    1.00    0.16
  -6  -2   1    0.66    0.16
   6   2  -1    0.55    0.14
   6   2  -1    1.00    0.20
   6   2  -1    0.77    0.20
   6   2  -1    0.37    0.14
   6   2  -1    0.77    0.13
   6   2  -1    0.87    0.14
  -6  -3   1   11.38    0.46
  -6  -3   1   11.20    0.47
  -6  -3   1   11.22    0.57
   6   3  -1   11.15    0.54
   6   3  -1   11.32    0.64
   6   3  -1   11.84    0.40
   6   3  -1   11.12    0.61
   6   3  -1   10.60    0.58
   6   3  -1   11.46    0.57
   6   3  -1   10.83    0.35
   6   3  -1   11.51    0.63
  -6  -4   1  435.76   12.05
  -6  -4   1  437.39   12.12
  -6  -4   1  425.34   12.07
   6   4  -1  432.67   11.82
   6   4  -1  432.12   12.06
   6   4  -1  428.45   11.49
   6   4  -1  440.95   12.07
  -6  -5   1   21.97    0.75
  -6  -5   1   21.25    0.72
   6   5  -1   21.48    1.02
   6   5  -1   22.33    0.98
   6   5  -1   20.27    0.86
   6   5  -1   20.99    0.87
  -6  -6   1   10.45    0.71
  -6  -6   1   11.04    0.76
  -6  -6   1   10.31    0.47
  -6  -6   1   10.43    0.44
   6   6  -1   10.96    0.74
   6   6  -1   11.57    0.57
   6   6  -1   10.69    0.57
   6   6  -1   12.19    0.74
  -6  -7   1   20.24    0.79
  -6  -7   1   21.34    0.77
  -6  -7   1   21.09    1.10
  -6  -7   1   24.99    1.18
   6   7  -1   20.75    1.13
   6   7  -1   20.52    1.09
   6   7  -1   20.32    0.86
   6   7  -1   21.88    0.86
  -6  -8   1    4.05    0.36
  -6  -8   1    4.35    0.58
  -6  -8   1    3.29    0.31
  -6  -8   1    3.84    0.58
   6   8  -1    3.62    0.33
   6   8  -1    3.97    0.56
   6   8  -1    4.39    0.63
  -6  -9   1    9.29    0.80
  -6  -9   1    9.01    0.81
  -6  -9   1    8.18    0.48
  -6  -9   1    7.98    0.52
   6   9  -1    8.15    0.81
  -6 -10   1    2.84    0.58
  -6 -10   1    2.32    0.38
  -6 -10   1    2.50    0.58
   6  10  -1    3.44    0.62
  -6 -11   1    0.15    0.39
  -6 -11   1    1.13    0.27
   6  11  -1    1.41    0.48
  -6 -12   1   30.39    1.63
  -6 -12   1   30.60    1.28
   6  12  -1   28.37    1.73
  -6 -13   1    1.07    0.32
  -7  13   1    5.13    0.91
   7 -13  -1    6.59    1.06
  -7  12   1    2.18    0.60
   7 -12  -1    1.17    0.58
  -7  11   1    9.75    0.98
  -7  11   1   11.23    1.28
   7 -11  -1   11.40    1.16
  -7  10   1   12.07    0.97
  -7  10   1    8.67    0.98
   7 -10  -1    9.02    0.99
  -7   9   1    0.75    0.32
  -7   9   1    1.92    0.49
   7  -9  -1    1.44    0.34
   7  -9  -1    0.62    0.40
  -7   8   1    5.36    0.63
  -7   8   1    5.28    0.66
  -7   8   1    5.62    0.49
   7  -8  -1    4.37    0.74
   7  -8  -1    6.71    0.52
  -7   7   1   -0.24    0.20
  -7   7   1    0.09    0.15
  -7   7   1    0.14    0.23
   7  -7  -1    0.39    0.32
   7  -7  -1    0.16    0.16
  -7   6   1   24.81    1.07
  -7   6   1   29.38    1.32
  -7   6   1   25.14    1.20
   7  -6  -1   24.39    1.28
   7  -6  -1   27.19    1.11
  -7   5   1   78.89    2.65
  -7   5   1   79.15    2.58
  -7   5   1   82.35    2.35
  -7   5   1   76.45    2.77
   7  -5  -1   84.57    2.62
   7  -5  -1   81.17    2.84
  -7   4   1   53.50    2.00
  -7   4   1   53.35    1.84
  -7   4   1   54.56    1.89
   7  -4  -1   54.55    1.85
   7  -4  -1   50.48    1.99
   7  -4  -1   54.21    1.95
  -7   3   1  102.96    3.19
  -7   3   1  106.21    3.34
  -7   3   1  101.50    3.17
   7  -3  -1  104.57    3.23
   7  -3  -1  100.29    3.33
   7  -3  -1  104.13    3.19
   7  -3  -1  103.78    3.01
  -7   2   1   84.57    2.74
  -7   2   1   89.95    2.89
  -7   2   1   95.62    2.87
  -7   2   1   87.98    2.71
   7  -2  -1   83.81    2.58
   7  -2  -1   84.91    2.74
   7  -2  -1   88.03    2.76
   7  -2  -1   85.72    2.84
  -7   1   1    5.95    0.43
  -7   1   1    5.72    0.43
  -7   1   1    6.91    0.50
  -7   1   1    6.50    0.31
  -7   1   1    5.41    0.43
   7  -1  -1    7.13    0.44
   7  -1  -1    7.23    0.47
   7  -1  -1    6.56    0.46
   7  -1  -1    6.78    0.45
  -7   0   1    0.48    0.16
  -7   0   1    0.77    0.13
  -7   0   1    0.80    0.22
  -7   0   1    0.88    0.15
  -7   0   1    0.96    0.23
  -7   0   1    0.42    0.14
   7   0  -1    0.91    0.21
   7   0  -1    0.54    0.16
   7   0  -1    0.39    0.16
   7   0  -1    0.41    0.14
   7   0  -1    0.48    0.15
  -7  -1   1    6.48    0.46
  -7  -1   1    6.58    0.42
  -7  -1   1    7.01    0.34
  -7  -1   1    6.45    0.40
   7   1  -1    6.91    0.38
   7   1  -1    6.67    0.45
   7   1  -1    6.62    0.44
   7   1  -1    6.60    0.32
   7   1  -1    6.79    0.40
   7   1  -1    6.41    0.43
   7   1  -1    6.23    0.43
  -7  -2   1   84.06    2.71
  -7  -2   1   86.07    2.57
  -7  -2   1   86.33    2.63
  -7  -2   1   85.37    2.63
   7   2  -1   85.55    2.54
   7   2  -1   90.36    2.78
   7   2  -1   90.50    2.73
   7   2  -1   85.52    2.72
   7   2  -1   85.58    2.59
   7   2  -1   88.99    2.61
  -7  -3   1  101.27    3.06
  -7  -3   1  103.24    3.05
  -7  -3   1  102.75    3.12
   7   3  -1  110.01    3.20
   7   3  -1  102.75    3.12
   7   3  -1  101.76    3.23
   7   3  -1  103.42    3.05
   7   3  -1  102.78    3.07
   7   3  -1  105.20    2.99
  -7  -4   1   53.43    1.64
  -7  -4   1   55.74    1.86
  -7  -4   1   52.95    1.67
   7   4  -1   53.85    1.87
   7   4  -1   52.89    1.76
   7   4  -1   53.51    1.79
   7   4  -1   53.88    1.81
   7   4  -1   52.64    1.92
  -7  -5   1   81.18    2.43
  -7  -5   1   80.91    2.40
  -7  -5   1   83.78    2.72
   7   5  -1   84.77    2.59
   7   5  -1   80.69    2.69
   7   5  -1   82.21    2.50
   7   5  -1   78.50    2.63
  -7  -6   1   25.91    0.86
  -7  -6   1   24.69    1.23
  -7  -6   1   25.55    0.89
   7   6  -1   27.04    1.04
   7   6  -1   27.47    1.04
   7   6  -1   24.08    1.14
   7   6  -1   23.87    1.20
  -7  -7   1   -0.04    0.10
  -7  -7   1   -0.10    0.23
  -7  -7   1    0.08    0.11
  -7  -7   1    0.22    0.22
   7   7  -1    0.24    0.21
   7   7  -1   -0.10    0.11
   7   7  -1    0.14    0.23
   7   7  -1   -0.08    0.16
  -7  -8   1    5.17    0.66
  -7  -8   1    5.71    0.39
  -7  -8   1    5.78    0.64
  -7  -8   1    5.92    0.35
   7   8  -1    4.92    0.60
   7   8  -1    5.67    0.42
   7   8  -1    5.48    0.67
  -7  -9   1    1.03    0.25
  -7  -9   1    0.87    0.36
  -7  -9   1    1.63    0.30
  -7  -9   1    1.25    0.38
   7   9  -1    2.55    0.58
  -7 -10   1   11.01    0.94
  -7 -10   1   10.15    0.58
   7  10  -1   10.87    0.97
  -7 -11   1    9.80    0.61
  -7 -11   1   10.59    0.99
   7  11  -1    8.71    1.01
  -7 -12   1    1.74    0.54
  -7 -12   1    2.91    0.47
   7  12  -1    3.84    0.89
  -7 -13   1    4.86    0.53
  -8  13   1    0.26    0.43
   8 -13  -1    0.28    0.46
  -8  12   1   17.64    1.33
   8 -12  -1   15.45    1.41
  -8  11   1    0.91    0.42
  -8  11   1    1.43    0.59
   8 -11  -1    0.66    0.45
  -8  10   1    3.41    0.66
  -8  10   1    1.62    0.54
   8 -10  -1    2.65    0.68
  -8   9   1    4.62    0.69
  -8   9   1    5.63    0.71
   8  -9  -1    6.24    0.54
   8  -9  -1    5.03    0.82
  -8   8   1    1.24    0.40
  -8   8   1    2.51    0.41
  -8   8   1    2.55    0.56
   8  -8  -1    2.70    0.42
   8  -8  -1    2.50    0.68
  -8   7   1   31.41    1.57
  -8   7   1   35.56    1.53
  -8   7   1   33.76    1.36
   8  -7  -1   33.40    1.64
   8  -7  -1   34.55    1.39
  -8   6   1   30.16    1.35
  -8   6   1   23.10    1.17
  -8   6   1   23.41    1.07
   8  -6  -1   23.31    1.08
   8  -6  -1   22.84    1.26
  -8   5   1    2.11    0.21
  -8   5   1    2.33    0.40
  -8   5   1    2.68    0.36
  -8   5   1    2.51    0.45
   8  -5  -1    2.56    0.38
   8  -5  -1    2.35    0.50
  -8   4   1   34.88    1.34
  -8   4   1   28.80    1.38
  -8   4   1   35.16    1.37
   8  -4  -1   32.75    1.40
   8  -4  -1   29.92    1.42
   8  -4  -1   34.78    1.34
  -8   3   1   36.14    1.45
  -8   3   1   41.31    1.50
  -8   3   1   43.56    1.61
   8  -3  -1   36.97    1.56
   8  -3  -1   37.86    1.51
   8  -3  -1   39.56    1.48
   8  -3  -1   38.35    1.37
  -8   2   1   14.11    0.78
  -8   2   1   10.90    0.64
  -8   2   1   12.03    0.73
  -8   2   1   12.16    0.68
   8  -2  -1   11.91    0.69
   8  -2  -1   11.54    0.62
   8  -2  -1   11.91    0.72
  -8   1   1   36.24    1.16
  -8   1   1   34.51    1.32
  -8   1   1   35.39    1.40
  -8   1   1   33.19    1.36
  -8   1   1   36.28    1.36
   8  -1  -1   34.99    1.28
   8  -1  -1   36.48    1.35
   8  -1  -1   35.82    1.36
   8  -1  -1   35.59    1.36
  -8   0   1   18.67    0.74
  -8   0   1   18.67    0.69
  -8   0   1   20.19    0.89
  -8   0   1   19.08    0.85
  -8   0   1   18.93    0.89
   8   0  -1   19.44    0.89
   8   0  -1   18.64    0.83
   8   0  -1   17.38    0.85
   8   0  -1   19.33    0.85
   8   0  -1   19.38    0.86
  -8  -1   1   36.30    1.17
  -8  -1   1   35.63    1.36
  -8  -1   1   37.02    1.32
  -8  -1   1   36.00    1.30
   8   1  -1   36.83    1.26
   8   1  -1   35.41    1.32
   8   1  -1   35.45    1.15
   8   1  -1   35.46    1.36
   8   1  -1   35.44    1.34
   8   1  -1   34.64    1.26
   8   1  -1   34.63    1.29
  -8  -2   1   12.40    0.59
  -8  -2   1   11.99    0.55
  -8  -2   1   11.67    0.67
   8   2  -1   11.33    0.54
   8   2  -1   11.79    0.51
   8   2  -1   12.40    0.62
   8   2  -1   12.36    0.68
   8   2  -1   11.42    0.66
   8   2  -1   10.92    0.63
  -8  -3   1   38.74    1.37
  -8  -3   1   38.69    1.32
  -8  -3   1   37.07    1.32
   8   3  -1   39.72    1.50
   8   3  -1   38.76    1.41
   8   3  -1   39.65    1.26
   8   3  -1   39.88    1.46
   8   3  -1   39.87    1.32
   8   3  -1   38.98    1.44
  -8  -4   1   33.25    1.29
  -8  -4   1   33.24    1.12
  -8  -4   1   31.57    1.13
   8   4  -1   31.36    1.35
   8   4  -1   32.57    0.98
   8   4  -1   34.95    1.30
   8   4  -1   33.06    1.26
   8   4  -1   32.14    1.21
   8   4  -1   33.34    0.90
   8   4  -1   32.79    1.32
  -8  -5   1    3.08    0.41
  -8  -5   1    2.81    0.25
  -8  -5   1    2.71    0.26
   8   5  -1    2.13    0.41
   8   5  -1    2.50    0.39
   8   5  -1    2.77    0.34
   8   5  -1    2.84    0.35
   8   5  -1    2.05    0.34
  -8  -6   1   22.84    0.84
  -8  -6   1   21.05    1.17
  -8  -6   1   23.19    0.81
   8   6  -1   23.51    1.00
   8   6  -1   20.94    1.16
   8   6  -1   23.40    1.00
   8   6  -1   23.05    1.07
   8   6  -1   23.21    1.17
  -8  -7   1   33.04    1.08
  -8  -7   1   31.95    1.12
  -8  -7   1   32.50    1.55
   8   7  -1   34.09    1.29
   8   7  -1   32.94    1.46
   8   7  -1   32.45    1.27
   8   7  -1   33.93    1.54
  -8  -8   1    1.14    0.39
  -8  -8   1    1.58    0.23
  -8  -8   1    2.12    0.27
   8   8  -1    1.23    0.36
   8   8  -1    2.55    0.53
   8   8  -1    2.38    0.34
  -8  -9   1    5.56    0.40
  -8  -9   1    5.80    0.36
  -8  -9   1    5.24    0.73
   8   9  -1    6.57    0.74
  -8 -10   1    1.53    0.45
  -8 -10   1    1.83    0.31
   8  10  -1    2.23    0.63
  -8 -11   1    1.85    0.34
  -8 -11   1    0.54    0.39
   8  11  -1    0.53    0.43
  -8 -12   1   14.08    0.73
  -8 -12   1   17.46    1.31
   8  12  -1   17.20    1.37
  -8 -13   1    0.25    0.20
  -9  12   1   -0.09    0.38
   9 -12  -1    0.20    0.52
  -9  11   1    3.52    0.75
  -9  11   1    5.03    0.92
   9 -11  -1    3.29    0.89
  -9  10   1    0.34    0.37
   9 -10  -1    0.08    0.35
  -9   9   1    0.00    0.17
  -9   9   1   -0.02    0.29
  -9   9   1    0.30    0.34
   9  -9  -1   -0.31    0.35
  -9   8   1    2.16    0.56
  -9   8   1    2.56    0.45
  -9   8   1    2.67    0.55
   9  -8  -1    2.44    0.42
   9  -8  -1    1.89    0.51
  -9   7   1    0.14    0.26
  -9   7   1    0.25    0.18
  -9   7   1   -0.34    0.21
   9  -7  -1   -0.14    0.27
   9  -7  -1    0.09    0.18
  -9   6   1   -0.02    0.16
  -9   6   1    0.17    0.25
  -9   6   1    0.29    0.27
   9  -6  -1    0.10    0.27
   9  -6  -1    0.06    0.15
  -9   5   1   28.18    1.26
  -9   5   1   28.18    1.20
  -9   5   1   27.08    0.96
  -9   5   1   22.73    1.29
   9  -5  -1   25.44    1.32
   9  -5  -1   27.27    1.19
  -9   4   1    0.35    0.24
  -9   4   1    0.20    0.24
  -9   4   1    0.06    0.15
   9  -4  -1    0.18    0.17
   9  -4  -1    0.14    0.22
   9  -4  -1    0.33    0.22
  -9   3   1   80.11    2.72
  -9   3   1   79.32    2.68
  -9   3   1   92.47    2.91
   9  -3  -1   78.53    2.74
   9  -3  -1   81.41    2.84
   9  -3  -1   83.62    2.73
  -9   2   1    1.68    0.33
  -9   2   1    1.63    0.33
  -9   2   1    1.45    0.16
  -9   2   1    1.50    0.36
  -9   2   1    1.37    0.38
   9  -2  -1    1.17    0.29
   9  -2  -1    1.41    0.37
   9  -2  -1    1.19    0.30
   9  -2  -1    1.47    0.32
  -9   1   1   22.58    1.02
  -9   1   1   23.73    1.10
  -9   1   1   23.78    0.83
  -9   1   1   23.76    1.05
  -9   1   1   19.41    1.02
   9  -1  -1   25.11    1.06
   9  -1  -1   23.29    1.04
   9  -1  -1   22.39    0.98
   9  -1  -1   24.35    1.06
  -9   0   1    3.69    0.40
  -9   0   1    4.37    0.41
  -9   0   1    3.89    0.27
  -9   0   1    3.53    0.37
   9   0  -1    4.54    0.41
   9   0  -1    3.96    0.41
   9   0  -1    4.47    0.41
   9   0  -1    3.60    0.40
   9   0  -1    4.04    0.39
  -9  -1   1   22.83    0.85
  -9  -1   1   23.17    0.98
  -9  -1   1   22.75    1.04
  -9  -1   1   23.61    0.76
  -9  -1   1   23.51    1.01
   9   1  -1   23.06    1.01
   9   1  -1   23.31    1.03
   9   1  -1   22.53    0.95
   9   1  -1   25.41    1.07
   9   1  -1   22.91    1.03
   9   1  -1   25.88    0.94
  -9  -2   1    1.79    0.14
  -9  -2   1    1.64    0.24
  -9  -2   1    1.56    0.28
  -9  -2   1    1.25    0.31
   9   2  -1    2.03    0.28
   9   2  -1    1.72    0.22
   9   2  -1    1.37    0.23
   9   2  -1    1.84    0.32
   9   2  -1    1.77    0.34
   9   2  -1    1.16    0.31
  -9  -3   1   80.44    2.57
  -9  -3   1   83.50    2.57
  -9  -3   1   83.03    2.56
   9   3  -1   80.23    2.48
   9   3  -1   79.34    2.61
   9   3  -1   84.85    2.61
   9   3  -1   79.68    2.70
   9   3  -1   84.79    2.71
   9   3  -1   82.43    2.50
  -9  -4   1    0.20    0.13
  -9  -4   1    0.15    0.13
  -9  -4   1    0.18    0.17
   9   4  -1    0.29    0.16
   9   4  -1    0.20    0.09
   9   4  -1    0.27    0.19
   9   4  -1   -0.06    0.19
   9   4  -1    0.32    0.18
   9   4  -1    0.10    0.17
  -9  -5   1   27.04    1.19
  -9  -5   1   25.81    0.97
  -9  -5   1   26.86    0.96
   9   5  -1   24.58    1.19
   9   5  -1   25.39    1.09
   9   5  -1   27.27    1.28
   9   5  -1   26.45    1.12
   9   5  -1   28.60    1.16
   9   5  -1   25.53    0.75
  -9  -6   1    0.18    0.13
  -9  -6   1   -0.29    0.21
  -9  -6   1   -0.03    0.10
   9   6  -1    0.16    0.24
   9   6  -1    0.06    0.22
   9   6  -1   -0.01    0.17
   9   6  -1    0.20    0.20
   9   6  -1   -0.04    0.14
  -9  -7   1    0.12    0.11
  -9  -7   1    0.17    0.30
  -9  -7   1    0.38    0.14
   9   7  -1    0.29    0.21
   9   7  -1   -0.01    0.14
   9   7  -1    0.11    0.26
   9   7  -1    0.35    0.28
  -9  -8   1    2.53    0.29
  -9  -8   1    2.80    0.26
  -9  -8   1    2.10    0.58
   9   8  -1    2.22    0.56
   9   8  -1    2.48    0.36
   9   8  -1    1.53    0.38
  -9  -9   1   -0.01    0.30
  -9  -9   1    0.08    0.12
  -9  -9   1    0.09    0.13
   9   9  -1    0.03    0.23
  -9 -10   1    0.28    0.15
  -9 -10   1    0.06    0.30
   9  10  -1    0.09    0.30
  -9 -11   1    2.61    0.74
  -9 -11   1    3.34    0.34
   9  11  -1    3.60    0.70
  -9 -12   1    0.89    0.48
  -9 -12   1    0.48    0.18
   9  12  -1   -0.29    0.38
 -10  12   1    1.31    0.53
  10 -12  -1    0.43    0.50
 -10  11   1    6.41    1.02
 -10  11   1    6.93    0.92
  10 -11  -1    7.48    1.03
 -10  10   1    0.20    0.35
  10 -10  -1    0.33    0.45
 -10   9   1   16.67    1.16
 -10   9   1   16.33    1.13
 -10   9   1   16.02    0.95
  10  -9  -1   15.74    1.23
 -10   8   1    5.42    0.75
 -10   8   1    5.22    0.57
 -10   8   1    4.67    0.69
  10  -8  -1    4.87    0.82
  10  -8  -1    4.70    0.56
 -10   7   1   26.97    1.36
 -10   7   1   26.37    1.25
 -10   7   1   27.27    1.47
  10  -7  -1   25.14    1.46
  10  -7  -1   26.91    1.27
 -10   6   1    6.52    0.60
 -10   6   1    6.15    0.35
 -10   6   1    8.06    0.76
 -10   6   1    7.17    0.66
  10  -6  -1    7.34    0.80
  10  -6  -1    6.95    0.61
 -10   5   1   21.20    0.85
 -10   5   1   21.04    1.07
 -10   5   1   22.92    1.23
 -10   5   1   18.97    1.05
  10  -5  -1   21.62    1.07
  10  -5  -1   22.01    1.24
 -10   4   1   14.09    0.94
 -10   4   1   13.07    0.81
 -10   4   1   13.86    0.83
  10  -4  -1   13.52    0.94
  10  -4  -1   13.56    0.82
 -10   3   1   23.43    1.23
 -10   3   1   26.31    1.20
 -10   3   1   27.15    1.19
  10  -3  -1   26.82    1.28
  10  -3  -1   27.98    1.22
 -10   2   1    0.16    0.20
 -10   2   1    0.22    0.19
 -10   2   1   -0.17    0.15
 -10   2   1    0.13    0.08
  10  -2  -1    0.00    0.16
  10  -2  -1    0.04    0.15
  10  -2  -1   -0.11    0.16
  10  -2  -1    0.16    0.19
 -10   1   1   54.47    1.75
 -10   1   1   58.23    2.03
 -10   1   1   52.85    2.03
 -10   1   1   50.80    1.96
 -10   1   1   54.35    1.74
  10  -1  -1   55.14    1.90
  10  -1  -1   58.75    2.04
  10  -1  -1   52.67    1.95
  10  -1  -1   54.12    1.99
 -10   0   1   62.28    2.20
 -10   0   1   67.20    2.27
 -10   0   1   63.99    2.24
 -10   0   1   63.72    1.96
  10   0  -1   61.50    2.17
  10   0  -1   63.49    2.22
  10   0  -1   63.16    2.19
  10   0  -1   60.38    2.11
  10   0  -1   67.18    2.27
 -10  -1   1   56.43    1.92
 -10  -1   1   52.56    1.53
 -10  -1   1   50.33    1.85
 -10  -1   1   50.51    1.91
 -10  -1   1   52.40    1.67
  10   1  -1   51.08    1.90
  10   1  -1   55.85    1.79
  10   1  -1   55.05    1.91
  10   1  -1   52.55    1.83
  10   1  -1   49.91    1.83
  10   1  -1   52.82    1.93
 -10  -2   1    0.18    0.19
 -10  -2   1    0.29    0.16
 -10  -2   1    0.24    0.08
 -10  -2   1    0.11    0.12
  10   2  -1    0.14    0.17
  10   2  -1    0.38    0.14
  10   2  -1    0.18    0.18
  10   2  -1    0.30    0.12
  10   2  -1    0.06    0.16
  10   2  -1    0.06    0.17
 -10  -3   1   26.89    1.09
 -10  -3   1   27.12    1.09
 -10  -3   1   27.36    1.07
  10   3  -1   28.66    1.22
  10   3  -1   25.74    1.20
  10   3  -1   25.88    1.15
  10   3  -1   27.77    1.01
  10   3  -1   27.89    1.01
 -10  -4   1   14.03    0.70
 -10  -4   1   14.80    0.70
 -10  -4   1   15.79    0.79
  10   4  -1   13.88    0.58
  10   4  -1   15.96    0.73
  10   4  -1   16.37    0.87
  10   4  -1   13.79    0.81
  10   4  -1   14.19    0.89
  10   4  -1   14.36    0.84
 -10  -5   1   22.50    1.05
 -10  -5   1   21.04    0.84
 -10  -5   1   19.40    0.85
  10   5  -1   19.38    0.98
  10   5  -1   19.35    0.92
  10   5  -1   19.54    1.09
  10   5  -1   22.25    1.02
  10   5  -1   20.75    1.06
 -10  -6   1    6.10    0.43
 -10  -6   1    6.44    0.41
  10   6  -1    6.25    0.55
  10   6  -1    5.83    0.53
  10   6  -1    7.01    0.28
  10   6  -1    7.02    0.67
  10   6  -1    5.96    0.64
  10   6  -1    6.58    0.55
 -10  -7   1   25.94    0.97
 -10  -7   1   22.80    1.36
 -10  -7   1   25.99    0.92
  10   7  -1   25.40    1.36
  10   7  -1   25.10    1.21
  10   7  -1   24.61    1.14
  10   7  -1   25.61    0.80
  10   7  -1   25.28    1.34
 -10  -8   1    4.81    0.37
 -10  -8   1    5.08    0.34
 -10  -8   1    4.52    0.69
  10   8  -1    5.47    0.72
  10   8  -1    6.06    0.64
  10   8  -1    5.25    0.50
 -10  -9   1   15.40    0.62
 -10  -9   1   17.12    1.21
 -10  -9   1   14.91    0.65
  10   9  -1   16.20    1.06
  10   9  -1   13.61    1.11
 -10 -10   1   -0.10    0.31
 -10 -10   1    0.12    0.13
  10  10  -1   -0.23    0.35
  10  10  -1    0.38    0.31
 -10 -11   1    7.51    0.99
  10  11  -1    7.66    0.91
 -10 -12   1    0.63    0.49
  10  12  -1    1.19    0.49
 -11  12   1    1.58    0.56
  11 -12  -1    2.16    0.68
 -11  11   1    2.15    0.67
 -11  11   1    3.47    0.80
  11 -11  -1    3.81    0.90
 -11  10   1    2.61    0.71
  11 -10  -1    1.48    0.56
 -11   9   1   -0.12    0.31
 -11   9   1   -0.17    0.26
 -11   9   1   -0.08    0.20
  11  -9  -1   -0.21    0.32
 -11   8   1    0.68    0.39
 -11   8   1    0.18    0.29
 -11   8   1    0.19    0.24
  11  -8  -1    0.84    0.44
 -11   7   1    4.63    0.57
 -11   7   1    3.51    0.70
 -11   7   1    3.50    0.62
  11  -7  -1    4.98    0.74
 -11   6   1    0.14    0.12
 -11   6   1   -0.18    0.17
 -11   6   1   -0.05    0.25
 -11   6   1   -0.08    0.25
  11  -6  -1    0.53    0.31
 -11   5   1    0.18    0.14
 -11   5   1    0.19    0.22
 -11   5   1    0.69    0.32
 -11   5   1    0.35    0.26
  11  -5  -1    0.12    0.26
 -11   4   1   18.08    1.01
 -11   4   1   15.51    1.03
 -11   4   1   18.86    1.03
  11  -4  -1   16.62    1.06
 -11   3   1    8.18    0.65
 -11   3   1    7.40    0.34
 -11   3   1    7.90    0.69
 -11   3   1    8.02    0.65
  11  -3  -1    7.72    0.69
  11  -3  -1    7.35    0.65
 -11   2   1    5.85    0.31
 -11   2   1    5.42    0.54
 -11   2   1    4.69    0.53
 -11   2   1    5.33    0.54
  11  -2  -1    5.51    0.54
  11  -2  -1    5.68    0.58
 -11   1   1    1.81    0.24
 -11   1   1    1.75    0.37
 -11   1   1    1.67    0.41
 -11   1   1    1.08    0.29
  11  -1  -1    1.06    0.27
  11  -1  -1    1.31    0.33
  11  -1  -1    1.53    0.36
 -11   0   1   17.33    0.97
 -11   0   1   19.07    0.75
 -11   0   1   19.13    0.97
 -11   0   1   20.31    1.03
  11   0  -1   17.82    0.99
  11   0  -1   19.25    0.95
  11   0  -1   19.34    0.96
 -11  -1   1    0.97    0.26
 -11  -1   1    1.46    0.34
 -11  -1   1    1.19    0.29
 -11  -1   1    1.17    0.22
 -11  -1   1    1.53    0.21
  11   1  -1    1.22    0.29
  11   1  -1    1.07    0.27
  11   1  -1    1.51    0.35
  11   1  -1    1.43    0.22
  11   1  -1    1.10    0.28
 -11  -2   1    6.09    0.42
 -11  -2   1    5.31    0.47
 -11  -2   1    5.49    0.54
 -11  -2   1    5.50    0.48
 -11  -2   1    5.45    0.27
  11   2  -1    5.51    0.51
  11   2  -1    5.57    0.37
  11   2  -1    4.71    0.50
  11   2  -1    5.14    0.52
  11   2  -1    5.27    0.43
 -11  -3   1    7.88    0.55
 -11  -3   1    7.35    0.51
  11   3  -1    7.33    0.46
  11   3  -1    7.00    0.59
  11   3  -1    8.18    0.66
  11   3  -1    8.12    0.62
  11   3  -1    7.77    0.47
 -11  -4   1   19.35    0.90
 -11  -4   1   16.56    0.81
 -11  -4   1   16.93    0.82
  11   4  -1   16.11    0.94
  11   4  -1   19.03    0.97
  11   4  -1   16.83    0.95
  11   4  -1   19.05    0.82
  11   4  -1   15.51    0.95
  11   4  -1   16.27    0.69
 -11  -5   1    0.20    0.16
 -11  -5   1   -0.05    0.15
 -11  -5   1    0.50    0.23
  11   5  -1    0.19    0.16
  11   5  -1    0.05    0.18
  11   5  -1   -0.19    0.21
  11   5  -1   -0.02    0.26
  11   5  -1    0.20    0.21
 -11  -6   1   -0.09    0.13
 -11  -6   1   -0.07    0.13
 -11  -6   1   -0.05    0.23
 -11  -6   1   -0.06    0.21
  11   6  -1    0.21    0.27
  11   6  -1   -0.09    0.16
  11   6  -1   -0.06    0.16
  11   6  -1   -0.04    0.21
  11   6  -1    0.27    0.22
 -11  -7   1    3.81    0.37
 -11  -7   1    4.17    0.36
 -11  -7   1    3.50    0.66
  11   7  -1    3.48    0.61
  11   7  -1    4.30    0.62
  11   7  -1    4.31    0.51
  11   7  -1    4.04    0.52
  11   7  -1    4.35    0.22
 -11  -8   1    0.32    0.14
 -11  -8   1    0.35    0.16
 -11  -8   1    0.60    0.39
  11   8  -1    0.47    0.35
  11   8  -1    0.26    0.26
 -11  -9   1    0.14    0.33
 -11  -9   1    0.03    0.13
 -11  -9   1    0.11    0.14
  11   9  -1   -0.30    0.28
  11   9  -1   -0.11    0.23
 -11 -10   1    2.34    0.26
 -11 -10   1    1.70    0.52
  11  10  -1    1.77    0.58
  11  10  -1    2.20    0.59
 -11 -11   1    4.38    0.94
  11  11  -1    3.54    0.93
  11  11  -1    3.40    0.72
 -11 -12   1    1.68    0.61
  11  12  -1    0.71    0.49
  11  12  -1    1.03    0.54
 -12  11   1    1.79    0.55
  12 -11  -1    1.89    0.68
 -12  10   1    7.69    0.93
  12 -10  -1    6.71    1.06
 -12   9   1   -0.29    0.29
 -12   9   1    0.25    0.26
 -12   9   1   -0.25    0.28
  12  -9  -1    0.07    0.44
 -12   8   1    4.20    0.71
 -12   8   1    3.72    0.58
 -12   8   1    2.93    0.69
  12  -8  -1    4.30    0.81
 -12   7   1    0.59    0.27
 -12   7   1    0.19    0.35
 -12   7   1    0.30    0.32
  12  -7  -1    0.25    0.38
 -12   6   1   22.47    1.31
 -12   6   1   20.86    0.87
 -12   6   1   19.97    1.15
 -12   6   1   18.98    1.12
  12  -6  -1   19.98    1.30
 -12   5   1   10.32    0.62
 -12   5   1   11.25    0.86
 -12   5   1    8.61    0.83
 -12   5   1   10.04    0.77
  12  -5  -1   11.51    0.93
 -12   4   1   39.44    1.69
 -12   4   1   41.01    1.27
 -12   4   1   36.67    1.76
 -12   4   1   42.56    1.71
  12  -4  -1   39.70    1.80
 -12   3   1    1.28    0.16
 -12   3   1    0.99    0.38
 -12   3   1    0.94    0.31
 -12   3   1    0.90    0.30
  12  -3  -1    0.94    0.36
 -12   2   1   36.63    1.61
 -12   2   1   34.79    1.55
 -12   2   1   35.69    1.53
  12  -2  -1   37.43    1.60
 -12   1   1    0.83    0.31
 -12   1   1    1.42    0.38
 -12   1   1    1.12    0.31
 -12   1   1    1.62    0.25
  12  -1  -1    1.40    0.39
  12  -1  -1    0.65    0.29
 -12   0   1    2.32    0.45
 -12   0   1    1.78    0.44
 -12   0   1    2.69    0.44
 -12   0   1    2.79    0.29
  12   0  -1    3.18    0.47
  12   0  -1    2.29    0.43
  12   0  -1    1.50    0.37
 -12  -1   1    0.89    0.28
 -12  -1   1    1.50    0.24
 -12  -1   1    1.03    0.30
 -12  -1   1    0.61    0.26
 -12  -1   1    1.64    0.22
  12   1  -1    1.67    0.25
  12   1  -1    1.07    0.27
  12   1  -1    0.90    0.28
  12   1  -1    1.14    0.31
 -12  -2   1   40.11    1.67
 -12  -2   1   38.99    1.15
 -12  -2   1   39.44    1.38
 -12  -2   1   37.84    1.54
 -12  -2   1   40.03    1.57
  12   2  -1   37.92    1.57
  12   2  -1   35.59    1.58
  12   2  -1   38.78    1.47
 -12  -3   1    1.35    0.31
 -12  -3   1    1.59    0.37
  12   3  -1    1.62    0.38
  12   3  -1    1.63    0.28
  12   3  -1    2.14    0.45
  12   3  -1    1.40    0.29
 -12  -4   1   40.46    1.52
 -12  -4   1   39.20    1.52
 -12  -4   1   41.50    1.55
  12   4  -1   39.93    1.71
  12   4  -1   40.11    1.38
  12   4  -1   39.23    1.44
  12   4  -1   40.75    1.66
  12   4  -1   41.04    1.65
 -12  -5   1   10.05    0.63
 -12  -5   1   10.88    0.63
 -12  -5   1   10.92    0.74
  12   5  -1   10.76    0.81
  12   5  -1   10.53    0.64
  12   5  -1    8.99    0.72
  12   5  -1   10.12    0.82
 -12  -6   1   22.15    0.96
 -12  -6   1   23.23    1.17
 -12  -6   1   21.89    0.92
 -12  -6   1   20.75    1.32
  12   6  -1   19.44    1.20
  12   6  -1   20.39    1.02
  12   6  -1   19.84    1.15
 -12  -7   1    0.42    0.19
 -12  -7   1    0.19    0.35
 -12  -7   1    0.73    0.19
  12   7  -1    0.39    0.37
  12   7  -1    0.27    0.23
  12   7  -1    0.72    0.30
 -12  -8   1    3.01    0.71
 -12  -8   1    3.60    0.39
  12   8  -1    3.48    0.54
  12   8  -1    3.37    0.67
 -12  -9   1    0.15    0.15
 -12  -9   1   -0.14    0.33
  12   9  -1    0.01    0.34
  12   9  -1    0.29    0.30
 -12 -10   1    4.99    0.85
  12  10  -1    5.10    0.73
  12  10  -1    5.73    0.89
 -12 -11   1    1.90    0.58
  12  11  -1    1.67    0.52
  12  11  -1    2.28    0.71
 -13  11   1   10.14    1.08
  13 -11  -1    7.49    1.15
 -13  10   1    1.08    0.46
  13 -10  -1    0.41    0.48
 -13   9   1    2.63    0.76
 -13   9   1    1.60    0.50
  13  -9  -1    2.41    0.63
 -13   8   1   -0.08    0.30
 -13   8   1   -0.36    0.31
 -13   8   1   -0.11    0.25
  13  -8  -1   -0.13    0.40
 -13   7   1    2.38    0.66
 -13   7   1    3.67    0.62
 -13   7   1    3.36    0.56
  13  -7  -1    4.05    0.78
 -13   6   1    0.98    0.38
 -13   6   1    0.93    0.39
 -13   6   1    0.09    0.27
 -13   6   1    0.06    0.17
  13  -6  -1    0.29    0.34
 -13   5   1   14.80    1.11
 -13   5   1   13.26    0.93
 -13   5   1   14.02    0.77
 -13   5   1   13.37    0.51
 -13   5   1   13.68    0.95
  13  -5  -1   14.15    1.06
 -13   4   1   20.32    1.27
 -13   4   1   19.82    0.65
 -13   4   1   19.79    1.12
 -13   4   1   17.91    1.13
  13  -4  -1   19.47    1.24
 -13   3   1   17.51    1.06
 -13   3   1   18.22    1.12
 -13   3   1   16.62    1.03
  13  -3  -1   17.81    1.13
 -13   2   1    9.18    0.77
 -13   2   1    8.18    0.75
 -13   2   1    9.57    0.58
  13  -2  -1    8.56    0.73
 -13   1   1    7.95    0.49
 -13   1   1    7.55    0.73
 -13   1   1    8.53    0.73
  13  -1  -1    7.04    0.66
 -13   0   1   -0.11    0.21
 -13   0   1   -0.46    0.18
 -13   0   1    0.10    0.13
 -13   0   1    0.13    0.25
  13   0  -1   -0.23    0.22
  13   0  -1   -0.37    0.17
  13   0  -1   -0.62    0.21
 -13  -1   1    8.41    0.71
 -13  -1   1    8.12    0.73
 -13  -1   1    7.11    0.67
 -13  -1   1    8.84    0.46
 -13  -1   1    8.49    0.50
  13   1  -1    7.90    0.62
  13   1  -1    7.39    0.68
  13   1  -1    7.37    0.68
 -13  -2   1    8.36    0.74
 -13  -2   1    8.47    0.40
 -13  -2   1    8.90    0.54
 -13  -2   1    8.31    0.68
 -13  -2   1    9.06    0.71
  13   2  -1    7.43    0.59
  13   2  -1    9.62    0.75
  13   2  -1    8.73    0.72
 -13  -3   1   17.15    0.93
 -13  -3   1   16.90    0.84
  13   3  -1   18.17    0.79
  13   3  -1   18.04    1.05
  13   3  -1   16.27    0.99
  13   3  -1   16.57    0.82
 -13  -4   1   19.21    0.98
 -13  -4   1   19.33    0.97
 -13  -4   1   19.86    0.97
  13   4  -1   19.10    1.06
  13   4  -1   19.31    1.13
  13   4  -1   19.33    0.88
  13   4  -1   21.09    1.14
 -13  -5   1   12.89    0.77
 -13  -5   1   14.35    0.78
 -13  -5   1   14.06    0.86
  13   5  -1   13.46    0.74
  13   5  -1   12.31    0.94
  13   5  -1   14.01    0.93
 -13  -6   1    0.53    0.22
 -13  -6   1    0.39    0.35
 -13  -6   1    0.30    0.29
 -13  -6   1    0.50    0.21
  13   6  -1    0.52    0.23
  13   6  -1    0.20    0.26
  13   6  -1    0.49    0.33
 -13  -7   1    2.07    0.55
 -13  -7   1    3.12    0.41
  13   7  -1    3.54    0.67
  13   7  -1    3.08    0.49
 -13  -8   1   -0.11    0.17
 -13  -8   1   -0.74    0.37
  13   8  -1   -0.12    0.23
  13   8  -1    0.03    0.38
 -13  -9   1    1.49    0.55
 -13  -9   1    2.58    0.34
  13   9  -1    1.82    0.51
  13   9  -1    1.63    0.53
 -13 -10   1    0.41    0.45
  13  10  -1    0.69    0.35
  13  10  -1    0.81    0.46
 -13 -11   1    7.04    1.16
  13  11  -1   10.40    1.25
  13  11  -1    8.69    0.98
 -14  10   1   10.00    1.00
  14 -10  -1   10.34    1.21
 -14   9   1    6.59    0.91
 -14   9   1    6.76    1.03
  14  -9  -1    7.59    1.12
 -14   8   1    8.40    1.08
 -14   8   1    9.21    0.88
 -14   8   1    7.86    0.91
  14  -8  -1    7.74    1.11
 -14   7   1    0.06    0.28
 -14   7   1    0.60    0.36
 -14   7   1    0.19    0.41
  14  -7  -1   -0.27    0.35
 -14   6   1   10.43    1.00
 -14   6   1   11.13    0.90
 -14   6   1   11.52    0.96
  14  -6  -1   12.76    1.13
 -14   5   1    0.69    0.32
 -14   5   1    1.03    0.41
 -14   5   1    0.46    0.24
 -14   5   1    0.95    0.36
  14  -5  -1    1.00    0.41
 -14   4   1   28.08    1.29
 -14   4   1   26.85    1.41
 -14   4   1   29.24    1.47
 -14   4   1   29.93    1.57
  14  -4  -1   28.21    1.54
 -14   3   1    1.56    0.45
 -14   3   1    1.53    0.40
 -14   3   1    0.69    0.32
  14  -3  -1    1.68    0.44
 -14   2   1   23.83    1.01
 -14   2   1   22.48    1.27
 -14   2   1   24.28    1.31
  14  -2  -1   23.18    1.26
 -14   1   1    4.24    0.61
 -14   1   1    4.71    0.41
 -14   1   1    3.72    0.60
  14  -1  -1    5.04    0.60
 -14   0   1   29.50    1.49
 -14   0   1   32.10    1.19
 -14   0   1   31.88    1.54
 -14   0   1   31.39    1.53
  14   0  -1   31.85    1.52
  14   0  -1   31.74    1.44
 -14  -1   1    4.49    0.36
 -14  -1   1    3.81    0.59
 -14  -1   1    3.24    0.59
 -14  -1   1    4.57    0.63
 -14  -1   1    4.46    0.40
  14   1  -1    3.93    0.51
  14   1  -1    4.39    0.61
 -14  -2   1   23.53    0.98
 -14  -2   1   21.66    1.24
 -14  -2   1   23.70    1.19
 -14  -2   1   21.43    1.15
 -14  -2   1   22.58    0.77
  14   2  -1   23.18    1.09
  14   2  -1   19.98    1.18
 -14  -3   1    0.79    0.30
 -14  -3   1    0.99    0.26
  14   3  -1    1.26    0.30
  14   3  -1    1.32    0.40
 -14  -4   1   29.09    1.31
 -14  -4   1   30.37    1.28
  14   4  -1   29.32    1.16
  14   4  -1   27.26    1.36
  14   4  -1   28.01    1.45
 -14  -5   1    0.71    0.28
 -14  -5   1    0.77    0.27
  14   5  -1    0.84    0.32
  14   5  -1    1.13    0.32
  14   5  -1    0.82    0.37
 -14  -6   1   11.17    1.03
 -14  -6   1   12.11    0.85
 -14  -6   1   12.64    0.77
  14   6  -1   11.64    0.74
  14   6  -1   12.02    0.91
  14   6  -1   10.86    0.95
 -14  -7   1    0.49    0.23
 -14  -7   1    0.17    0.38
  14   7  -1    0.62    0.39
  14   7  -1    0.22    0.25
 -14  -8   1    6.77    0.98
 -14  -8   1    8.49    0.60
  14   8  -1    8.34    0.75
  14   8  -1    8.76    0.94
 -14  -9   1    5.83    0.47
 -14  -9   1    4.90    0.93
  14   9  -1    6.70    0.73
  14   9  -1    4.70    0.84
 -14 -10   1    8.99    1.14
  14  10  -1    9.59    1.11
 -15  10   1   -0.35    0.40
  15 -10  -1   -0.34    0.48
 -15   9   1    5.77    0.98
 -15   9   1    5.26    0.89
  15  -9  -1    5.10    0.97
 -15   8   1   -0.24    0.44
 -15   8   1    0.12    0.28
 -15   8   1    0.53    0.40
  15  -8  -1   -0.15    0.43
 -15   7   1    3.20    0.71
 -15   7   1    2.24    0.60
 -15   7   1    3.59    0.72
  15  -7  -1    1.75    0.61
 -15   6   1    1.01    0.40
 -15   6   1    0.71    0.36
 -15   6   1    0.31    0.37
  15  -6  -1    0.21    0.40
 -15   5   1    3.03    0.67
 -15   5   1    2.21    0.54
 -15   5   1    2.55    0.43
 -15   5   1    2.72    0.65
  15  -5  -1    1.71    0.48
 -15   4   1    1.13    0.37
 -15   4   1    1.02    0.31
 -15   4   1    1.80    0.47
 -15   4   1    0.95    0.36
  15  -4  -1    1.04    0.41
 -15   3   1    6.94    0.80
 -15   3   1    7.86    0.60
 -15   3   1    5.88    0.71
  15  -3  -1    8.18    0.83
 -15   2   1    0.62    0.35
 -15   2   1    0.63    0.32
 -15   2   1    1.15    0.32
  15  -2  -1    0.59    0.32
 -15   1   1    7.58    0.77
 -15   1   1    7.56    0.52
 -15   1   1    9.24    0.86
  15  -1  -1    6.32    0.67
 -15   0   1    0.25    0.28
 -15   0   1    0.49    0.20
 -15   0   1    0.22    0.31
  15   0  -1    0.13    0.31
  15   0  -1    0.03    0.24
 -15  -1   1    5.48    0.71
 -15  -1   1    7.57    0.45
 -15  -1   1    6.27    0.80
 -15  -1   1    8.10    0.53
  15   1  -1    7.67    0.81
 -15  -2   1    0.47    0.30
 -15  -2   1    0.94    0.20
 -15  -2   1    0.26    0.28
 -15  -2   1    0.75    0.22
  15   2  -1    0.90    0.37
 -15  -3   1    7.25    0.69
 -15  -3   1    6.73    0.54
  15   3  -1    5.72    0.70
 -15  -4   1    1.70    0.44
 -15  -4   1    2.01    0.40
  15   4  -1    1.61    0.32
  15   4  -1    1.54    0.39
  15   4  -1    1.19    0.41
 -15  -5   1    2.57    0.48
  15   5  -1    2.41    0.60
  15   5  -1    1.25    0.36
  15   5  -1    1.57    0.36
 -15  -6   1    0.89    0.28
 -15  -6   1    0.37    0.35
  15   6  -1    0.61    0.38
  15   6  -1    0.96    0.27
 -15  -7   1    2.89    0.47
 -15  -7   1    2.63    0.76
  15   7  -1    2.77    0.51
  15   7  -1    3.44    0.72
 -15  -8   1    0.28    0.23
 -15  -8   1   -0.53    0.38
  15   8  -1    0.64    0.45
 -15  -9   1    5.33    1.08
 -15  -9   1    4.10    0.46
  15   9  -1    6.79    0.95
 -15 -10   1    0.15    0.48
  15  10  -1    0.51    0.53
 -16   9   1    6.18    0.94
  16  -9  -1    4.29    1.06
 -16   8   1    1.52    0.59
 -16   8   1    1.37    0.49
  16  -8  -1    2.14    0.64
 -16   7   1    8.90    1.07
 -16   7   1    7.34    0.84
 -16   7   1    5.13    0.83
  16  -7  -1    5.97    0.96
 -16   6   1    2.55    0.65
 -16   6   1    3.24    0.72
 -16   6   1    3.18    0.64
  16  -6  -1    3.39    0.74
 -16   5   1    4.20    0.53
 -16   5   1    2.78    0.61
 -16   5   1    2.97    0.71
 -16   5   1    3.34    0.65
  16  -5  -1    3.59    0.70
 -16   4   1   10.15    0.92
 -16   4   1   10.34    0.81
 -16   4   1   10.33    1.06
  16  -4  -1   11.60    0.99
 -16   3   1    0.54    0.24
 -16   3   1    0.46    0.35
 -16   3   1    0.08    0.27
 -16   3   1    0.21    0.25
  16  -3  -1    0.86    0.38
 -16   2   1   13.04    0.73
 -16   2   1   13.10    1.06
 -16   2   1   12.37    0.99
  16  -2  -1   11.89    0.96
 -16   1   1    9.22    0.60
 -16   1   1   10.42    0.93
 -16   1   1    9.26    0.86
  16  -1  -1    9.14    0.83
 -16   0   1    5.82    0.78
 -16   0   1    6.69    0.51
 -16   0   1    4.46    0.70
 -16   0   1    7.62    0.52
  16   0  -1    6.55    0.77
 -16  -1   1    7.68    0.84
 -16  -1   1    9.11    0.59
 -16  -1   1    8.35    0.87
  16   1  -1   10.05    0.89
 -16  -2   1   10.57    0.88
  16   2  -1   11.35    0.94
 -16  -3   1    0.31    0.25
  16   3  -1    0.10    0.31
 -16  -4   1    9.89    0.81
  16   4  -1   10.48    0.64
  16   4  -1   10.07    0.92
  16   4  -1   11.13    0.86
 -16  -5   1    3.56    0.57
 -16  -5   1    4.54    0.77
  16   5  -1    3.98    0.62
  16   5  -1    3.64    0.68
  16   5  -1    4.28    0.47
 -16  -6   1    3.54    0.76
 -16  -6   1    3.10    0.54
  16   6  -1    1.37    0.47
 -16  -7   1    6.76    0.66
 -16  -7   1    7.59    1.05
  16   7  -1    7.02    0.89
 -16  -8   1    1.15    0.61
 -16  -8   1    1.79    0.47
  16   8  -1    1.57    0.55
 -16  -9   1    3.93    0.49
 -16  -9   1    2.66    0.74
  16   9  -1    3.29    0.84
 -17   9   1   -0.10    0.42
  17  -9  -1   -0.08    0.44
 -17   8   1    2.23    0.68
 -17   8   1    1.97    0.58
  17  -8  -1    2.33    0.72
 -17   7   1    0.00    0.35
 -17   7   1    0.30    0.36
 -17   7   1    0.26    0.46
  17  -7  -1   -0.20    0.39
 -17   6   1   -0.47    0.36
 -17   6   1    0.24    0.33
 -17   6   1    0.10    0.35
  17  -6  -1   -0.30    0.33
 -17   5   1    1.52    0.44
 -17   5   1    0.14    0.34
 -17   5   1    1.51    0.51
  17  -5  -1    1.13    0.47
 -17   4   1    7.03    0.94
 -17   4   1    4.51    0.74
 -17   4   1    5.88    0.65
  17  -4  -1    4.24    0.73
 -17   3   1    2.61    0.55
 -17   3   1    3.49    0.74
 -17   3   1    3.84    0.78
  17  -3  -1    2.79    0.60
 -17   2   1   -0.21    0.29
 -17   2   1    0.18    0.28
  17  -2  -1    1.04    0.38
 -17   1   1   -0.10    0.26
 -17   1   1   -0.02    0.33
 -17   0   1    2.84    0.69
 -17   0   1    3.46    0.69
 -17  -1   1   -0.94    0.26
 -17  -1   1   -0.22    0.29
  17   1  -1    0.01    0.31
 -17  -2   1   -0.42    0.26
  17   2  -1    0.20    0.34
 -17  -3   1    2.92    0.57
  17   3  -1    2.75    0.71
 -17  -4   1    5.72    0.69
 -17  -4   1    4.26    0.77
  17   4  -1    4.50    0.64
  17   4  -1    4.59    0.74
 -17  -5   1    0.54    0.32
 -17  -5   1    0.27    0.43
  17   5  -1    0.80    0.43
 -17  -6   1   -0.16    0.36
 -17  -6   1   -0.17    0.23
  17   6  -1    0.00    0.37
 -17  -7   1    0.10    0.43
 -17  -7   1   -0.14    0.25
  17   7  -1    0.64    0.45
 -17  -8   1    2.10    0.52
 -17  -8   1    1.92    0.71
  17   8  -1    1.97    0.61
 -17  -9   1    0.44    0.54
 -17  -9   1    0.00    0.22
  17   9  -1   -0.75    0.37
 -18   8   1    0.20    0.46
  18  -8  -1   -0.16    0.45
 -18   7   1   29.76    1.77
 -18   7   1   28.97    1.93
  18  -7  -1   30.46    1.97
 -18   6   1    4.35    0.78
 -18   6   1    4.17    0.97
  18  -6  -1    2.77    0.79
 -18   5   1    5.62    0.96
 -18   5   1    2.91    0.68
  18  -5  -1    3.51    0.83
 -18   4   1    3.35    0.63
 -18   4   1    4.21    0.77
 -18   4   1    4.49    0.85
  18  -4  -1    3.82    0.73
 -18   3   1   13.46    1.17
 -18   3   1   12.50    1.10
 -18   3   1   12.55    0.99
 -18   2   1    0.16    0.38
 -18   2   1    0.00    0.27
 -18   2   1    0.44    0.38
 -18   1   1   40.51    1.99
 -18   1   1   35.03    1.89
 -18   0   1    0.54    0.37
 -18   0   1    0.03    0.36
 -18  -1   1   39.22    1.91
  18   1  -1   37.28    1.90
 -18  -2   1   -0.15    0.28
  18   2  -1    0.02    0.36
 -18  -3   1   11.99    1.00
 -18  -3   1   12.68    1.16
  18   3  -1   13.82    1.12
 -18  -4   1    2.45    0.63
 -18  -4   1    2.08    0.58
  18   4  -1    3.07    0.72
 -18  -5   1    2.29    0.58
 -18  -5   1    3.85    0.84
  18   5  -1    2.81    0.73
 -18  -6   1    2.28    0.63
 -18  -6   1    2.73    0.61
  18   6  -1    2.28    0.67
 -18  -7   1   28.48    1.43
 -18  -7   1   30.66    1.98
  18   7  -1   31.34    1.82
 -18  -8   1    0.02    0.27
 -18  -8   1   -0.48    0.53
  18   8  -1    0.22    0.54
 -19   7   1    0.51    0.55
  19  -7  -1    0.31    0.48
 -19   6   1    0.23    0.46
 -19   5   1    1.66    0.58
 -19   5   1    3.28    0.83
 -19   4   1   -0.18    0.32
 -19   4   1    0.52    0.34
 -19   4   1    0.10    0.41
 -19   3   1    6.04    0.79
 -19   3   1    4.39    0.83
 -19   3   1    3.92    0.86
 -19   2   1    1.19    0.53
 -19   2   1    1.04    0.39
 -19   2   1    1.23    0.45
 -19   1   1    0.96    0.44
 -19   1   1    0.99    0.44
 -19   1   1    0.47    0.39
 -19   0   1    6.17    0.84
 -19   0   1    5.55    0.90
 -19  -1   1    1.18    0.46
 -19  -1   1    0.57    0.44
  19   1  -1    0.53    0.48
 -19  -2   1    0.75    0.43
 -19  -2   1    0.07    0.36
  19   2  -1    1.23    0.51
 -19  -3   1    4.57    0.93
 -19  -3   1    7.42    0.87
  19   3  -1    4.91    0.85
 -19  -4   1    0.09    0.32
 -19  -4   1    0.29    0.46
  19   4  -1    0.15    0.40
 -19  -5   1    1.78    0.60
 -19  -5   1    1.99    0.51
  19   5  -1    2.15    0.62
 -19  -6   1    0.04    0.43
 -19  -6   1   -0.12    0.31
  19   6  -1   -0.20    0.44
 -19  -7   1    0.56    0.34
 -19  -7   1    0.53    0.55
  19   7  -1    1.42    0.59
 -20   6   1    2.83    0.75
 -20   5   1    0.79    0.55
 -20   4   1   21.98    1.39
 -20   4   1   23.31    1.75
 -20   3   1    3.10    0.76
 -20   3   1    3.21    0.70
 -20   2   1   10.25    0.96
 -20   2   1    7.27    1.00
 -20   1   1   10.10    1.13
 -20   1   1   10.75    1.08
 -20   0   1    1.88    0.59
 -20   0   1    3.23    0.82
 -20  -1   1   11.25    1.11
 -20  -1   1   11.74    1.11
  20   1  -1    9.74    1.10
 -20  -2   1    6.95    0.92
 -20  -2   1    9.25    1.14
  20   2  -1    8.01    1.02
 -20  -3   1    3.38    0.73
 -20  -3   1    2.10    0.61
  20   3  -1    4.39    0.96
 -20  -4   1   21.58    1.67
 -20  -4   1   23.14    1.47
  20   4  -1   27.22    1.73
 -20  -5   1    1.40    0.45
 -20  -5   1    1.51    0.57
  20   5  -1    0.89    0.57
 -20  -6   1    2.68    0.69
 -20  -6   1    1.46    0.60
  20   6  -1    3.51    0.87
 -21   4   1    1.01    0.59
 -21   3   1   11.41    1.09
 -21   3   1   10.31    1.21
 -21   2   1    1.19    0.59
 -21   2   1    0.96    0.41
 -21   1   1    1.11    0.54
 -21   1   1    0.22    0.36
 -21   0   1    0.25    0.42
 -21   0   1    1.47    0.55
 -21  -1   1    0.17    0.39
 -21  -1   1    0.51    0.42
 -21  -2   1    1.00    0.49
 -21  -2   1    1.56    0.53
  21   2  -1    0.63    0.52
 -21  -3   1   10.23    1.08
 -21  -3   1   11.80    1.32
  21   3  -1   10.54    1.19
 -21  -4   1    0.78    0.43
 -21  -4   1    0.80    0.56
  21   4  -1    0.30    0.52
 -22   2   1    1.51    0.52
 -22   2   1    1.79    0.64
 -22   1   1   -0.15    0.36
 -22   1   1   -0.02    0.37
 -22   0   1    3.41    0.87
 -22   0   1    1.42    0.52
 -22  -1   1   -0.39    0.38
 -22  -1   1    0.35    0.42
 -22  -2   1    2.83    0.82
 -22  -2   1    1.05    0.48
  22   2  -1   -0.27    0.55
  22   2   2   -0.02    0.49
 -22  -2  -2    0.45    0.42
 -22  -1  -2    0.00    0.43
 -22   0  -2   -0.09    0.41
 -22   1  -2    0.51    0.49
 -22   2  -2   -0.53    0.39
  21   4   2   22.03    1.68
 -21  -4  -2   25.04    1.60
  21   3   2    1.48    0.67
 -21  -3  -2    1.09    0.52
  21   2   2    5.60    0.96
 -21  -2  -2    5.79    0.94
  21   1   2    1.53    0.64
 -21  -1  -2    0.95    0.50
 -21   0  -2   -0.32    0.37
 -21   1  -2    1.43    0.61
 -21   2  -2    5.61    0.98
 -21   3  -2    0.12    0.48
 -21   4  -2   24.59    1.80
  20   6   2    4.17    0.94
 -20  -6  -2    2.10    0.57
  20   5   2    1.26    0.59
 -20  -5  -2    0.78    0.46
  20   4   2    3.51    0.86
 -20  -4  -2    1.81    0.54
  20   3   2    0.15    0.48
 -20  -3  -2    0.43    0.43
 -20  -3  -2    0.96    0.45
  20   2   2    3.28    0.91
 -20  -2  -2    3.71    0.80
 -20  -2  -2    3.77    0.79
  20   1   2    4.62    0.97
 -20  -1  -2    5.35    0.83
 -20  -1  -2    4.54    0.83
 -20   0  -2    9.67    1.05
 -20   1  -2    3.59    0.83
 -20   2  -2    2.43    0.67
 -20   3  -2    0.01    0.54
 -20   4  -2    1.56    0.59
 -20   5  -2    0.32    0.48
 -20   6  -2    3.85    0.98
  19   7   2    0.94    0.57
 -19  -7  -2    0.39    0.37
  19   6   2    6.09    1.00
 -19  -6  -2    5.90    0.82
  19   5   2    0.02    0.46
 -19  -5  -2    0.03    0.34
  19   4   2    4.32    0.84
 -19  -4  -2    6.65    0.88
  19   3   2   -0.19    0.38
 -19  -3  -2    0.24    0.36
 -19  -3  -2    0.73    0.41
  19   2   2    7.51    0.92
 -19  -2  -2    7.32    0.93
 -19  -2  -2    7.39    0.92
  19   1   2    2.08    0.58
 -19  -1  -2    1.67    0.50
 -19  -1  -2    2.22    0.58
 -19   0  -2    1.33    0.48
 -19   0  -2    2.68    0.78
 -19   1  -2    1.85    0.55
 -19   1  -2    1.92    0.51
 -19   2  -2    5.86    0.98
 -19   2  -2    6.46    0.90
 -19   3  -2   -0.10    0.37
 -19   3  -2    0.34    0.50
 -19   4  -2    5.21    0.93
 -19   4  -2    5.51    0.88
 -19   5  -2   -0.40    0.42
  19  -6   2    6.00    0.99
 -19   6  -2    7.49    1.11
  19  -7   2    0.80    0.60
 -19   7  -2    0.47    0.57
  18   8   2   13.17    1.36
 -18  -8  -2   14.52    1.03
 -18  -8  -2   11.53    1.46
  18   7   2    1.05    0.55
 -18  -7  -2    0.39    0.36
  18   6   2    1.84    0.66
 -18  -6  -2    2.66    0.66
  18   5   2   -0.11    0.39
 -18  -5  -2    0.26    0.34
  18   4   2   23.52    1.48
 -18  -4  -2   22.08    1.38
 -18  -4  -2   23.47    1.51
  18   3   2    0.10    0.38
 -18  -3  -2    0.15    0.33
 -18  -3  -2    0.05    0.30
  18   2   2    0.46    0.42
 -18  -2  -2    0.43    0.33
 -18  -2  -2   -0.16    0.34
 -18  -1  -2    1.36    0.46
 -18  -1  -2    0.39    0.36
  18   0   2   24.57    1.52
 -18   0  -2   26.06    1.56
 -18   0  -2   28.61    1.65
 -18   1  -2    0.85    0.42
 -18   1  -2    1.02    0.49
 -18   2  -2    0.69    0.36
 -18   2  -2    0.37    0.38
  18  -3   2   -0.08    0.34
 -18   3  -2   -0.01    0.31
 -18   3  -2    0.23    0.39
  18  -4   2   25.53    1.57
 -18   4  -2   24.11    1.66
 -18   4  -2   21.68    1.50
  18  -5   2    0.04    0.40
 -18   5  -2    0.24    0.32
 -18   5  -2    0.45    0.43
  18  -6   2    3.44    0.92
 -18   6  -2    2.71    0.72
 -18   6  -2    3.99    0.98
  18  -7   2   -0.51    0.40
 -18   7  -2    0.81    0.42
 -18   7  -2    0.71    0.54
  18  -8   2   12.14    1.32
 -18   8  -2   13.17    1.46
  17   9   2    0.74    0.58
 -17  -9  -2    0.91    0.36
 -17  -9  -2    0.39    0.52
  17   8   2    0.34    0.48
 -17  -8  -2   -0.16    0.28
  17   7   2    3.74    0.84
 -17  -7  -2    4.20    0.64
  17   6   2    0.00    0.23
  17   6   2   -0.36    0.38
 -17  -6  -2    0.27    0.29
  17   5   2    3.80    0.50
  17   5   2    3.96    0.82
 -17  -5  -2    2.06    0.59
  17   4   2    0.71    0.27
  17   4   2    1.10    0.51
 -17  -4  -2    2.23    0.56
 -17  -4  -2    1.27    0.41
  17   3   2    6.72    0.83
  17   3   2    7.50    0.67
 -17  -3  -2    6.87    0.81
 -17  -3  -2    6.79    0.77
  17   2   2    2.13    0.53
 -17  -2  -2    2.31    0.62
 -17  -2  -2    2.54    0.62
  17   1   2    6.78    0.82
 -17  -1  -2    8.37    0.69
 -17  -1  -2    6.47    0.83
 -17  -1  -2    7.28    0.86
  17   0   2    0.66    0.39
 -17   0  -2   -0.11    0.31
 -17   0  -2    0.12    0.32
 -17   1  -2    8.82    0.90
 -17   1  -2    8.27    0.93
  17  -2   2    2.54    0.58
 -17   2  -2    2.94    0.72
 -17   2  -2    3.27    0.68
  17  -3   2    6.95    0.85
 -17   3  -2    5.26    0.77
 -17   3  -2    6.30    0.86
  17  -4   2    1.37    0.44
 -17   4  -2    0.70    0.36
 -17   4  -2    1.29    0.47
  17  -5   2    2.13    0.58
 -17   5  -2    1.47    0.44
 -17   5  -2    3.92    0.79
  17  -6   2   -0.59    0.29
 -17   6  -2    0.24    0.41
 -17   6  -2    0.20    0.32
  17  -7   2    3.53    0.87
 -17   7  -2    2.53    0.69
 -17   7  -2    5.03    0.97
  17  -8   2    0.24    0.49
 -17   8  -2   -0.05    0.30
 -17   8  -2    0.12    0.47
 -17   8  -2    0.77    0.42
  17  -9   2    0.67    0.56
 -17   9  -2    0.26    0.39
 -17   9  -2    0.29    0.41
  16   9   2    3.56    0.85
 -16  -9  -2    2.98    0.57
 -16  -9  -2    1.96    0.68
  16   8   2   15.22    1.03
  16   8   2   13.84    1.25
 -16  -8  -2   16.48    1.04
  16   7   2    3.56    0.55
  16   7   2    2.85    0.69
 -16  -7  -2    2.96    0.58
  16   6   2    2.28    0.57
  16   6   2    1.91    0.48
 -16  -6  -2    2.79    0.56
  16   5   2    1.54    0.40
  16   5   2    2.03    0.46
  16   5   2    1.45    0.50
 -16  -5  -2    1.52    0.41
  16   4   2    5.71    0.55
  16   4   2    5.64    0.75
  16   4   2    4.46    0.56
 -16  -4  -2    5.21    0.76
 -16  -4  -2    4.94    0.64
  16   3   2    2.50    0.60
  16   3   2    3.19    0.49
 -16  -3  -2    2.80    0.55
 -16  -3  -2    2.44    0.45
 -16  -3  -2    3.78    0.67
  16   2   2    5.65    0.72
 -16  -2  -2    4.74    0.67
 -16  -2  -2    4.48    0.51
 -16  -2  -2    5.13    0.71
  16   1   2    3.43    0.63
 -16  -1  -2    3.94    0.41
 -16  -1  -2    3.37    0.46
 -16  -1  -2    2.34    0.64
 -16  -1  -2    2.87    0.73
  16   0   2   53.03    2.21
  16   0   2   50.83    2.13
 -16   0  -2   53.52    1.79
 -16   0  -2   51.76    1.90
 -16   0  -2   51.24    2.25
 -16   0  -2   48.14    2.21
  16  -1   2    2.93    0.57
 -16   1  -2    3.34    0.63
 -16   1  -2    4.77    0.70
 -16   1  -2    3.71    0.48
 -16   1  -2    2.68    0.46
  16  -2   2    5.22    0.73
 -16   2  -2    4.49    0.67
 -16   2  -2    4.70    0.78
  16  -3   2    2.98    0.59
 -16   3  -2    3.95    0.65
 -16   3  -2    4.17    0.77
  16  -4   2    4.99    0.74
 -16   4  -2    5.77    0.75
 -16   4  -2    5.44    0.80
  16  -5   2    0.66    0.39
 -16   5  -2    1.16    0.51
 -16   5  -2    1.36    0.41
  16  -6   2    1.45    0.50
 -16   6  -2    2.92    0.76
 -16   6  -2    2.76    0.63
  16  -7   2    1.77    0.61
 -16   7  -2    2.45    0.61
 -16   7  -2    2.55    0.67
 -16   7  -2    3.14    0.75
  16  -8   2   17.35    1.45
 -16   8  -2   18.44    1.27
 -16   8  -2   18.34    1.56
 -16   8  -2   17.40    1.26
  16  -9   2    2.67    0.74
 -16   9  -2    1.16    0.44
 -16   9  -2    1.83    0.51
  15  10   2    8.13    1.09
  15  10   2    7.24    0.98
 -15 -10  -2    8.13    0.70
 -15 -10  -2    7.79    1.17
  15   9   2    0.90    0.52
  15   9   2    1.71    0.45
 -15  -9  -2    1.99    0.51
 -15  -9  -2    0.85    0.53
  15   8   2    8.81    0.82
  15   8   2   10.23    1.08
 -15  -8  -2   10.91    0.82
  15   7   2    3.61    0.55
  15   7   2    3.90    0.83
  15   7   2    4.26    0.65
 -15  -7  -2    3.68    0.57
  15   6   2   14.97    1.19
  15   6   2   14.51    0.99
  15   6   2   16.22    0.94
 -15  -6  -2   16.21    0.99
  15   5   2    2.18    0.61
  15   5   2    2.50    0.47
  15   5   2    3.09    0.50
 -15  -5  -2    3.45    0.56
 -15  -5  -2    2.04    0.57
  15   4   2    1.34    0.43
  15   4   2    1.81    0.43
  15   4   2    1.55    0.37
 -15  -4  -2    2.03    0.47
 -15  -4  -2    1.93    0.50
 -15  -4  -2    1.37    0.37
  15   3   2    0.51    0.35
  15   3   2    0.39    0.21
  15   3   2    0.29    0.23
 -15  -3  -2    0.44    0.28
 -15  -3  -2    0.10    0.26
 -15  -3  -2    0.34    0.24
  15   2   2   21.69    1.27
 -15  -2  -2   22.53    1.27
 -15  -2  -2   23.42    1.11
 -15  -2  -2   21.44    1.28
 -15  -2  -2   26.10    0.93
  15   1   2    4.63    0.65
  15   1   2    5.18    0.61
 -15  -1  -2    4.45    0.42
 -15  -1  -2    4.85    0.51
 -15  -1  -2    2.38    0.67
 -15  -1  -2    4.68    0.68
  15   0   2   27.57    1.40
  15   0   2   27.82    1.48
 -15   0  -2   28.08    1.49
 -15   0  -2   30.50    1.24
 -15   0  -2   27.04    1.47
 -15   0  -2   28.90    1.16
  15  -1   2    5.07    0.66
 -15   1  -2    4.53    0.52
 -15   1  -2    3.87    0.46
 -15   1  -2    3.94    0.69
 -15   1  -2    4.75    0.67
  15  -2   2   24.50    1.38
 -15   2  -2   24.00    1.42
 -15   2  -2   24.27    1.37
 -15   2  -2   27.24    1.18
  15  -3   2    0.15    0.29
 -15   3  -2    0.65    0.34
 -15   3  -2    0.08    0.29
  15  -4   2    2.33    0.64
 -15   4  -2    2.59    0.63
 -15   4  -2    1.75    0.53
  15  -5   2    1.65    0.48
 -15   5  -2    3.10    0.69
 -15   5  -2    3.30    0.65
  15  -6   2   16.66    1.26
 -15   6  -2   15.11    1.25
 -15   6  -2   16.42    1.12
 -15   6  -2   16.20    1.16
  15  -7   2    3.39    0.88
 -15   7  -2    3.17    0.70
 -15   7  -2    2.83    0.65
 -15   7  -2    2.75    0.65
  15  -8   2    9.65    1.19
 -15   8  -2    9.59    1.11
 -15   8  -2   10.18    0.96
 -15   8  -2   10.12    0.95
  15  -9   2    1.16    0.53
 -15   9  -2    1.20    0.47
 -15   9  -2    1.20    0.43
  15 -10   2   10.74    1.31
 -15  10  -2    7.27    0.95
  14  10   2    1.01    0.43
  14  10   2    1.12    0.58
 -14 -10  -2    0.69    0.28
 -14 -10  -2    0.16    0.47
  14   9   2    5.33    0.89
  14   9   2    4.17    0.64
 -14  -9  -2    5.99    0.61
 -14  -9  -2    6.37    0.97
  14   8   2    0.06    0.28
  14   8   2   -0.03    0.36
 -14  -8  -2    0.40    0.27
  14   7   2    6.36    0.91
  14   7   2    6.48    0.68
  14   7   2    6.91    0.74
 -14  -7  -2    6.36    0.65
  14   6   2    1.62    0.51
  14   6   2    1.69    0.46
  14   6   2    2.15    0.45
 -14  -6  -2    1.74    0.44
  14   5   2    7.32    0.61
  14   5   2    7.78    0.67
  14   5   2    6.70    0.76
 -14  -5  -2    7.34    0.67
 -14  -5  -2    7.63    0.76
  14   4   2    0.76    0.35
  14   4   2    0.77    0.27
  14   4   2    0.94    0.26
 -14  -4  -2    0.49    0.30
 -14  -4  -2    0.58    0.27
 -14  -4  -2    0.42    0.27
  14   3   2   31.44    1.56
  14   3   2   34.08    1.41
  14   3   2   33.48    1.35
 -14  -3  -2   35.19    1.56
 -14  -3  -2   36.64    1.47
 -14  -3  -2   34.68    1.60
  14   2   2    0.66    0.34
  14   2   2    0.00    0.20
 -14  -2  -2    0.37    0.16
 -14  -2  -2    0.35    0.28
 -14  -2  -2    0.51    0.28
 -14  -2  -2    0.58    0.23
 -14  -2  -2    0.46    0.29
  14   1   2   18.90    1.06
  14   1   2   19.92    0.85
  14   1   2   19.42    1.16
 -14  -1  -2   20.96    0.97
 -14  -1  -2   17.07    1.12
 -14  -1  -2   19.59    1.13
 -14  -1  -2   18.93    1.15
 -14  -1  -2   21.03    0.85
  14   0   2    2.69    0.60
  14   0   2    1.90    0.49
 -14   0  -2    1.29    0.30
 -14   0  -2    1.59    0.36
 -14   0  -2    1.06    0.37
 -14   0  -2    1.02    0.35
  14  -1   2   18.56    1.13
 -14   1  -2   20.19    0.95
 -14   1  -2   19.48    1.19
 -14   1  -2   21.17    0.98
 -14   1  -2   20.79    1.19
  14  -2   2   -0.12    0.25
 -14   2  -2    0.33    0.23
 -14   2  -2    0.40    0.27
 -14   2  -2    0.02    0.25
  14  -3   2   34.28    1.67
 -14   3  -2   37.50    1.51
 -14   3  -2   31.89    1.69
 -14   3  -2   35.89    1.67
  14  -4   2    0.36    0.34
 -14   4  -2    0.38    0.28
 -14   4  -2    0.88    0.40
  14  -5   2    6.80    0.86
 -14   5  -2    7.17    0.74
 -14   5  -2    6.76    0.73
 -14   5  -2    5.85    0.81
  14  -6   2    1.07    0.46
 -14   6  -2    1.64    0.42
 -14   6  -2    1.53    0.48
 -14   6  -2    2.29    0.59
  14  -7   2    8.00    0.94
 -14   7  -2    5.98    0.80
 -14   7  -2    5.56    0.88
 -14   7  -2    7.66    0.79
  14  -8   2    0.22    0.47
 -14   8  -2    0.28    0.44
 -14   8  -2    0.35    0.34
 -14   8  -2    0.15    0.29
  14  -9   2    5.99    0.96
 -14   9  -2    4.85    0.74
 -14   9  -2    5.29    0.78
  14 -10   2    1.70    0.66
 -14  10  -2    0.16    0.41
  13  11   2    0.04    0.38
  13  11   2    0.41    0.55
 -13 -11  -2    0.30    0.44
 -13 -11  -2    0.48    0.26
  13  10   2   10.99    1.15
  13  10   2   10.69    0.99
 -13 -10  -2    9.17    1.16
 -13 -10  -2    9.88    0.72
  13   9   2    0.38    0.33
  13   9   2    0.75    0.46
 -13  -9  -2    0.73    0.28
  13   8   2    1.45    0.50
  13   8   2    0.87    0.34
 -13  -8  -2    0.93    0.29
  13   7   2    0.36    0.35
  13   7   2    0.22    0.28
  13   7   2    0.37    0.26
 -13  -7  -2    0.35    0.25
  13   6   2   20.63    1.29
  13   6   2   23.19    1.21
  13   6   2   22.27    1.13
 -13  -6  -2   23.77    1.15
  13   5   2   -0.27    0.24
  13   5   2    0.32    0.24
  13   5   2    0.16    0.21
 -13  -5  -2    0.17    0.25
 -13  -5  -2    0.39    0.27
 -13  -5  -2    0.19    0.23
  13   4   2   34.27    1.36
  13   4   2   31.41    1.37
  13   4   2   32.45    1.54
 -13  -4  -2   34.84    1.46
 -13  -4  -2   31.59    1.44
 -13  -4  -2   34.27    1.53
  13   3   2   -0.08    0.17
  13   3   2    0.08    0.27
  13   3   2    0.07    0.16
  13   3   2   -0.07    0.16
 -13  -3  -2    0.41    0.24
 -13  -3  -2    0.27    0.21
 -13  -3  -2    0.00    0.21
 -13  -3  -2    0.12    0.21
  13   2   2   45.66    1.83
  13   2   2   50.99    1.99
 -13  -2  -2   49.99    1.54
 -13  -2  -2   47.96    1.94
 -13  -2  -2   50.74    1.95
 -13  -2  -2   51.58    1.81
 -13  -2  -2   48.06    1.97
  13   1   2    0.04    0.20
  13   1   2    0.21    0.26
 -13  -1  -2   -0.20    0.23
 -13  -1  -2    0.29    0.26
 -13  -1  -2    0.04    0.24
 -13  -1  -2    0.20    0.16
 -13  -1  -2    0.07    0.19
  13   0   2    5.88    0.64
  13   0   2    6.78    0.63
 -13   0  -2    6.37    0.64
 -13   0  -2    7.60    0.53
 -13   0  -2    7.60    0.52
 -13   0  -2    7.46    0.72
 -13   0  -2    7.08    0.68
  13  -1   2    0.16    0.24
 -13   1  -2    0.15    0.18
 -13   1  -2    0.18    0.25
 -13   1  -2    0.09    0.23
  13  -2   2   51.65    2.08
 -13   2  -2   47.64    2.09
 -13   2  -2   49.30    2.04
 -13   2  -2   54.80    1.87
  13  -3   2    0.16    0.26
 -13   3  -2   -0.10    0.25
 -13   3  -2    0.67    0.34
  13  -4   2   32.93    1.63
 -13   4  -2   33.10    1.69
 -13   4  -2   32.76    1.55
  13  -5   2    0.00    0.28
 -13   5  -2    0.19    0.26
 -13   5  -2    0.39    0.28
 -13   5  -2    0.06    0.30
  13  -6   2   21.60    1.36
 -13   6  -2   21.18    1.22
 -13   6  -2   21.85    1.21
 -13   6  -2   23.02    1.40
  13  -7   2   -0.13    0.32
 -13   7  -2    0.10    0.30
 -13   7  -2    0.34    0.31
 -13   7  -2    0.51    0.44
  13  -8   2    0.67    0.45
 -13   8  -2    1.59    0.44
 -13   8  -2    1.17    0.51
 -13   8  -2    1.03    0.35
  13  -9   2    1.28    0.51
 -13   9  -2    0.95    0.36
 -13   9  -2    0.76    0.40
  13 -10   2    9.01    1.17
 -13  10  -2   10.42    0.99
  13 -11   2   -0.14    0.45
 -13  11  -2    0.63    0.44
  12  11   2    4.08    0.99
  12  11   2    3.20    0.76
 -12 -11  -2    3.02    0.79
 -12 -11  -2    3.44    0.51
  12  10   2    0.36    0.43
  12  10   2    0.29    0.35
 -12 -10  -2    0.37    0.43
 -12 -10  -2   -0.04    0.21
  12   9   2    3.22    0.73
  12   9   2    4.85    0.68
 -12  -9  -2    5.02    0.55
  12   8   2    9.33    0.92
  12   8   2    8.38    0.79
  12   8   2    8.39    0.75
 -12  -8  -2    7.94    0.63
  12   7   2    5.05    0.56
  12   7   2    5.01    0.59
  12   7   2    4.38    0.62
  12   7   2    4.93    0.72
 -12  -7  -2    5.39    0.54
  12   6   2    1.98    0.43
  12   6   2    1.66    0.24
  12   6   2    1.39    0.42
  12   6   2    1.01    0.31
  12   6   2    2.54    0.47
 -12  -6  -2    2.45    0.44
 -12  -6  -2    1.94    0.37
  12   5   2    5.23    0.65
  12   5   2    5.25    0.56
  12   5   2    5.81    0.54
 -12  -5  -2    5.54    0.62
 -12  -5  -2    5.54    0.50
 -12  -5  -2    4.84    0.52
 -12  -5  -2    5.75    0.58
  12   4   2    8.03    0.57
  12   4   2    6.58    0.68
  12   4   2    6.85    0.50
  12   4   2    7.77    0.62
 -12  -4  -2    7.73    0.61
 -12  -4  -2    7.15    0.61
 -12  -4  -2    5.95    0.65
  12   3   2   10.06    0.64
  12   3   2    8.83    0.74
  12   3   2   10.56    0.64
  12   3   2   10.06    0.62
 -12  -3  -2    9.68    0.74
 -12  -3  -2   10.92    0.71
 -12  -3  -2   10.21    0.71
 -12  -3  -2   10.40    0.68
  12   2   2   -0.08    0.14
  12   2   2    0.05    0.16
  12   2   2   -0.01    0.22
 -12  -2  -2   -0.15    0.18
 -12  -2  -2   -0.10    0.17
 -12  -2  -2   -0.02    0.15
 -12  -2  -2    0.10    0.20
 -12  -2  -2    0.02    0.11
  12   1   2   19.41    0.98
  12   1   2   18.37    1.02
 -12  -1  -2   17.11    1.00
 -12  -1  -2   20.33    0.90
 -12  -1  -2   22.67    1.10
 -12  -1  -2   17.29    1.03
 -12  -1  -2   20.43    0.79
  12   0   2   15.27    0.91
  12   0   2   15.62    0.63
  12   0   2   14.61    0.86
 -12   0  -2   16.36    0.78
 -12   0  -2   17.39    0.96
 -12   0  -2   15.81    0.73
 -12   0  -2   16.50    0.95
 -12   0  -2   14.63    0.94
  12  -1   2   18.41    1.05
  12  -1   2   18.87    1.04
 -12   1  -2   19.77    1.07
 -12   1  -2   21.92    0.93
 -12   1  -2   19.52    1.10
  12  -2   2   -0.12    0.22
 -12   2  -2   -0.01    0.16
 -12   2  -2   -0.04    0.24
 -12   2  -2   -0.19    0.17
  12  -3   2   11.04    0.86
 -12   3  -2   10.82    0.81
 -12   3  -2   10.72    0.85
  12  -4   2    6.60    0.71
 -12   4  -2    7.73    0.77
 -12   4  -2    7.81    0.66
 -12   4  -2    7.17    0.69
  12  -5   2    6.05    0.71
 -12   5  -2    5.89    0.63
 -12   5  -2    5.73    0.75
 -12   5  -2    5.61    0.59
  12  -6   2    1.96    0.56
 -12   6  -2    1.81    0.51
 -12   6  -2    2.05    0.50
 -12   6  -2    2.37    0.62
  12  -7   2    4.59    0.79
 -12   7  -2    4.13    0.59
 -12   7  -2    4.46    0.71
 -12   7  -2    3.76    0.61
  12  -8   2    9.07    0.98
 -12   8  -2    7.96    0.79
 -12   8  -2    8.98    0.94
 -12   8  -2    8.99    0.83
  12  -9   2    5.30    0.84
 -12   9  -2    4.20    0.63
 -12   9  -2    2.99    0.65
  12 -10   2    0.17    0.46
 -12  10  -2    0.07    0.33
  12 -11   2    3.10    0.86
 -12  11  -2    4.30    0.78
  11  12   2   14.93    1.40
 -11 -12  -2   14.17    1.34
 -11 -12  -2   14.69    0.86
  11  11   2    3.39    0.94
  11  11   2    2.80    0.68
 -11 -11  -2    2.66    0.73
 -11 -11  -2    3.81    0.54
  11  10   2    2.62    0.61
  11  10   2    3.43    0.77
 -11 -10  -2    3.77    0.79
 -11 -10  -2    2.98    0.47
  11   9   2    0.17    0.31
  11   9   2   -0.32    0.30
 -11  -9  -2    0.20    0.21
  11   8   2   16.34    1.20
  11   8   2   18.71    1.12
  11   8   2   17.70    1.15
 -11  -8  -2   19.89    0.95
  11   7   2    1.16    0.28
  11   7   2    1.76    0.47
  11   7   2    0.74    0.18
  11   7   2    0.62    0.37
  11   7   2    1.08    0.34
 -11  -7  -2    0.91    0.23
 -11  -7  -2    1.53    0.39
  11   6   2    0.07    0.26
  11   6   2    0.20    0.24
  11   6   2    0.26    0.14
  11   6   2    0.55    0.23
  11   6   2    0.19    0.20
 -11  -6  -2    0.34    0.19
 -11  -6  -2    0.62    0.23
  11   5   2    0.31    0.14
  11   5   2    0.48    0.30
  11   5   2   -0.07    0.19
  11   5   2    0.26    0.22
  11   5   2    0.09    0.12
  11   5   2    0.24    0.20
 -11  -5  -2    0.13    0.19
 -11  -5  -2   -0.09    0.21
 -11  -5  -2    0.20    0.22
 -11  -5  -2    0.25    0.18
  11   4   2   69.05    2.40
  11   4   2   69.30    2.27
  11   4   2   66.67    2.26
  11   4   2   66.45    2.45
  11   4   2   66.69    2.20
 -11  -4  -2   70.75    2.38
 -11  -4  -2   67.08    2.33
 -11  -4  -2   63.91    2.36
  11   3   2    2.05    0.43
  11   3   2    2.26    0.40
  11   3   2    2.63    0.37
  11   3   2    3.34    0.37
  11   3   2    3.17    0.37
 -11  -3  -2    2.31    0.45
 -11  -3  -2    2.26    0.36
 -11  -3  -2    2.82    0.40
 -11  -3  -2    2.68    0.39
  11   2   2    2.32    0.31
  11   2   2    2.59    0.34
  11   2   2    1.95    0.40
  11   2   2    1.98    0.37
  11   2   2    2.50    0.31
 -11  -2  -2    2.12    0.40
 -11  -2  -2    1.82    0.31
 -11  -2  -2    2.27    0.24
 -11  -2  -2    2.36    0.38
 -11  -2  -2    2.37    0.37
  11   1   2    1.32    0.22
  11   1   2    0.30    0.20
  11   1   2    1.11    0.31
  11   1   2    0.89    0.27
 -11  -1  -2    0.95    0.24
 -11  -1  -2    0.78    0.25
 -11  -1  -2    0.16    0.20
 -11  -1  -2    0.37    0.21
 -11  -1  -2    0.94    0.21
  11   0   2   37.75    1.57
  11   0   2   41.51    1.34
  11   0   2   41.58    1.62
  11   0   2   40.70    1.66
 -11   0  -2   39.35    1.63
 -11   0  -2   40.87    1.36
 -11   0  -2   43.85    1.69
 -11   0  -2   41.50    1.45
 -11   0  -2   37.90    1.62
  11  -1   2    0.73    0.25
  11  -1   2    0.23    0.18
  11  -1   2    0.54    0.24
 -11   1  -2    0.46    0.23
 -11   1  -2    0.84    0.21
 -11   1  -2    0.98    0.29
  11  -2   2    1.74    0.42
  11  -2   2    1.92    0.38
 -11   2  -2    2.14    0.42
 -11   2  -2    1.73    0.39
  11  -3   2    2.41    0.47
 -11   3  -2    2.70    0.50
 -11   3  -2    2.10    0.43
  11  -4   2   65.18    2.52
 -11   4  -2   67.36    2.56
 -11   4  -2   65.96    2.42
 -11   4  -2   69.18    2.37
  11  -5   2    0.37    0.31
 -11   5  -2   -0.01    0.20
 -11   5  -2    0.08    0.25
 -11   5  -2    0.20    0.24
  11  -6   2    0.27    0.31
 -11   6  -2    0.46    0.29
 -11   6  -2    0.72    0.30
 -11   6  -2    0.48    0.11
 -11   6  -2    0.60    0.24
  11  -7   2    1.58    0.45
 -11   7  -2    1.94    0.50
 -11   7  -2    1.25    0.33
 -11   7  -2    1.05    0.37
  11  -8   2   16.48    1.23
 -11   8  -2   18.73    1.11
 -11   8  -2   17.78    1.22
 -11   8  -2   18.44    1.07
  11  -9   2    0.25    0.36
 -11   9  -2    0.27    0.32
 -11   9  -2    0.29    0.33
 -11   9  -2    0.38    0.25
  11 -10   2    4.26    0.89
 -11  10  -2    2.13    0.50
  11 -11   2    3.75    0.96
 -11  11  -2    2.88    0.76
  11 -12   2   15.60    1.46
 -10 -12  -2    5.12    0.60
 -10 -12  -2    5.18    0.95
  10  11   2    1.40    0.51
 -10 -11  -2    1.16    0.32
 -10 -11  -2    2.65    0.78
  10  10   2    0.17    0.31
 -10 -10  -2    0.22    0.34
 -10 -10  -2   -0.16    0.19
  10   9   2    0.08    0.25
 -10  -9  -2   -0.09    0.19
  10   8   2    7.79    0.83
  10   8   2    7.48    0.74
 -10  -8  -2    8.29    0.61
  10   7   2    0.28    0.18
  10   7   2    0.30    0.16
  10   7   2    0.72    0.36
  10   7   2    0.29    0.25
  10   7   2    0.20    0.23
 -10  -7  -2    0.23    0.17
 -10  -7  -2    0.22    0.19
  10   6   2    0.74    0.25
  10   6   2    1.63    0.34
  10   6   2    1.31    0.38
  10   6   2    1.44    0.23
  10   6   2    1.83    0.42
 -10  -6  -2    1.16    0.35
 -10  -6  -2    1.72    0.31
 -10  -6  -2    0.98    0.25
  10   5   2   32.78    1.32
  10   5   2   31.96    1.02
  10   5   2   30.41    1.45
  10   5   2   31.50    1.33
  10   5   2   32.44    1.35
  10   5   2   32.05    1.14
 -10  -5  -2   30.87    1.27
 -10  -5  -2   31.34    1.33
 -10  -5  -2   33.92    1.43
 -10  -5  -2   32.09    1.23
  10   4   2   42.93    1.72
  10   4   2   42.10    1.29
  10   4   2   42.86    1.58
  10   4   2   43.74    1.57
  10   4   2   42.86    1.49
  10   4   2   43.15    1.65
 -10  -4  -2   42.49    1.65
 -10  -4  -2   42.18    1.64
 -10  -4  -2   42.57    1.59
  10   3   2   19.45    0.87
  10   3   2   19.49    1.00
  10   3   2   19.02    0.96
  10   3   2   20.39    0.86
  10   3   2   20.51    0.87
 -10  -3  -2   19.47    0.92
 -10  -3  -2   20.24    0.93
 -10  -3  -2   19.24    0.98
  10   2   2    0.07    0.12
  10   2   2   -0.08    0.11
  10   2   2    0.06    0.18
  10   2   2   -0.01    0.12
  10   2   2   -0.01    0.13
 -10  -2  -2   -0.03    0.14
 -10  -2  -2   -0.10    0.11
 -10  -2  -2    0.05    0.09
 -10  -2  -2   -0.15    0.14
 -10  -2  -2    0.07    0.13
  10   1   2    4.77    0.47
  10   1   2    4.82    0.35
  10   1   2    4.88    0.45
  10   1   2    5.32    0.49
 -10  -1  -2    4.32    0.38
 -10  -1  -2    5.21    0.34
 -10  -1  -2    4.45    0.47
 -10  -1  -2    5.25    0.48
 -10  -1  -2    5.02    0.49
  10   0   2    4.33    0.45
  10   0   2    4.11    0.45
  10   0   2    4.39    0.28
  10   0   2    4.94    0.48
  10   0   2    4.58    0.44
 -10   0  -2    3.63    0.44
 -10   0  -2    4.89    0.35
 -10   0  -2    4.09    0.46
 -10   0  -2    4.37    0.49
 -10   0  -2    4.74    0.38
  10  -1   2    4.80    0.47
  10  -1   2    4.04    0.43
  10  -1   2    5.21    0.50
  10  -1   2    3.02    0.40
 -10   1  -2    4.85    0.38
 -10   1  -2    4.41    0.50
 -10   1  -2    4.03    0.50
 -10   1  -2    4.61    0.50
  10  -2   2    0.05    0.15
  10  -2   2   -0.06    0.14
  10  -2   2    0.31    0.20
 -10   2  -2    0.15    0.20
 -10   2  -2   -0.06    0.15
  10  -3   2   20.44    1.02
  10  -3   2   20.20    1.03
  10  -3   2   19.63    1.06
 -10   3  -2   19.78    0.97
 -10   3  -2   20.40    1.08
 -10   3  -2   19.31    1.00
  10  -4   2   46.74    1.75
  10  -4   2   42.93    1.79
  10  -4   2   40.27    1.68
 -10   4  -2   40.24    1.77
 -10   4  -2   41.47    1.61
 -10   4  -2   41.42    1.67
  10  -5   2   32.24    1.55
  10  -5   2   32.37    1.45
 -10   5  -2   34.27    1.41
 -10   5  -2   33.67    1.56
 -10   5  -2   33.00    1.06
 -10   5  -2   33.18    1.44
  10  -6   2    1.56    0.44
  10  -6   2    1.22    0.39
 -10   6  -2    1.56    0.22
 -10   6  -2    1.24    0.36
 -10   6  -2    1.47    0.42
 -10   6  -2    1.03    0.31
  10  -7   2    0.18    0.30
 -10   7  -2    0.17    0.21
 -10   7  -2    0.57    0.31
 -10   7  -2    0.98    0.31
  10  -8   2    8.27    0.93
 -10   8  -2    7.95    0.74
 -10   8  -2    9.53    0.86
 -10   8  -2    8.88    0.72
  10  -9   2    0.58    0.37
 -10   9  -2   -0.05    0.21
 -10   9  -2   -0.10    0.25
 -10   9  -2    0.28    0.30
  10 -10   2    0.06    0.39
 -10  10  -2   -0.49    0.28
  10 -11   2    2.32    0.66
 -10  11  -2    1.44    0.46
  10 -12   2    4.36    0.91
  -9 -12  -2    4.77    0.88
  -9 -12  -2    3.98    0.59
   9  11   2    0.30    0.36
  -9 -11  -2    0.22    0.38
  -9 -11  -2    0.39    0.26
   9  10   2    4.31    0.69
  -9 -10  -2    3.40    0.70
  -9 -10  -2    3.58    0.71
  -9 -10  -2    4.75    0.52
   9   9   2    7.06    0.73
  -9  -9  -2    6.46    0.58
  -9  -9  -2    8.45    0.81
   9   8   2    2.27    0.48
   9   8   2    2.07    0.34
  -9  -8  -2    3.02    0.37
  -9  -8  -2    2.79    0.41
   9   7   2    4.77    0.57
   9   7   2    4.90    0.55
   9   7   2    4.72    0.45
  -9  -7  -2    4.10    0.39
  -9  -7  -2    4.66    0.45
   9   6   2   24.01    1.06
   9   6   2   25.32    1.20
   9   6   2   23.63    1.28
   9   6   2   25.11    1.17
  -9  -6  -2   24.42    0.99
  -9  -6  -2   24.09    1.04
  -9  -6  -2   26.76    1.28
   9   5   2    1.15    0.20
   9   5   2    1.13    0.27
   9   5   2    0.83    0.33
   9   5   2    0.66    0.21
   9   5   2    1.12    0.21
   9   5   2    1.46    0.36
  -9  -5  -2    1.41    0.33
  -9  -5  -2    1.27    0.33
  -9  -5  -2    0.89    0.27
  -9  -5  -2    1.15    0.26
   9   4   2   22.41    0.88
   9   4   2   21.30    0.97
   9   4   2   23.11    1.11
   9   4   2   22.26    0.76
   9   4   2   21.64    1.00
   9   4   2   23.00    0.99
  -9  -4  -2   21.00    1.00
  -9  -4  -2   23.06    0.95
  -9  -4  -2   23.27    1.06
  -9  -4  -2   21.94    0.96
   9   3   2    8.71    0.63
   9   3   2    7.75    0.47
   9   3   2    7.60    0.51
   9   3   2    7.93    0.39
   9   3   2    8.73    0.59
   9   3   2    7.12    0.49
  -9  -3  -2    8.56    0.56
  -9  -3  -2    7.64    0.54
  -9  -3  -2    7.21    0.55
   9   2   2   57.75    2.02
   9   2   2   57.11    1.88
   9   2   2   56.09    1.93
   9   2   2   59.04    2.03
  -9  -2  -2   59.68    1.97
  -9  -2  -2   60.01    1.94
  -9  -2  -2   57.16    1.66
  -9  -2  -2   57.32    2.01
  -9  -2  -2   56.55    1.98
   9   1   2   14.89    0.78
   9   1   2   14.29    0.67
   9   1   2   14.67    0.73
   9   1   2   14.20    0.76
   9   1   2   15.51    0.65
  -9  -1  -2   14.98    0.68
  -9  -1  -2   14.80    0.59
  -9  -1  -2   15.15    0.77
  -9  -1  -2   14.30    0.78
  -9  -1  -2   13.91    0.76
   9   0   2    7.87    0.56
   9   0   2    7.98    0.54
   9   0   2    6.82    0.50
   9   0   2    7.01    0.34
   9   0   2    6.60    0.51
  -9   0  -2    6.23    0.50
  -9   0  -2    7.25    0.44
  -9   0  -2    7.42    0.42
  -9   0  -2    6.24    0.52
  -9   0  -2    6.81    0.52
   9  -1   2   15.64    0.82
   9  -1   2   15.38    0.78
   9  -1   2   14.45    0.79
   9  -1   2   13.72    0.77
  -9   1  -2   14.93    0.80
  -9   1  -2   13.27    0.78
  -9   1  -2   15.34    0.70
  -9   1  -2   16.56    0.85
   9  -2   2   58.06    2.03
   9  -2   2   65.21    2.14
   9  -2   2   57.27    2.11
  -9   2  -2   56.05    2.12
  -9   2  -2   58.88    2.08
   9  -3   2    7.74    0.59
   9  -3   2    7.34    0.58
   9  -3   2    7.26    0.62
  -9   3  -2    7.28    0.60
  -9   3  -2    8.20    0.67
  -9   3  -2    8.35    0.57
   9  -4   2   23.42    1.10
   9  -4   2   21.50    1.05
   9  -4   2   21.53    1.15
  -9   4  -2   23.72    1.04
  -9   4  -2   21.82    1.14
  -9   4  -2   21.15    1.04
  -9   4  -2   22.54    0.70
   9  -5   2    0.94    0.29
   9  -5   2    0.85    0.30
   9  -5   2    0.86    0.24
  -9   5  -2    0.74    0.25
  -9   5  -2    0.99    0.32
  -9   5  -2    0.95    0.26
  -9   5  -2    1.52    0.20
   9  -6   2   22.79    1.14
   9  -6   2   24.03    1.29
  -9   6  -2   25.16    0.96
  -9   6  -2   24.66    1.29
  -9   6  -2   24.07    1.14
  -9   6  -2   23.41    1.13
   9  -7   2    3.63    0.61
   9  -7   2    4.90    0.53
  -9   7  -2    4.69    0.56
  -9   7  -2    5.80    0.65
  -9   7  -2    4.37    0.41
  -9   7  -2    4.35    0.52
   9  -8   2    2.72    0.66
  -9   8  -2    1.96    0.50
  -9   8  -2    3.14    0.46
  -9   8  -2    3.54    0.61
   9  -9   2    8.68    0.94
  -9   9  -2    6.36    0.62
  -9   9  -2    8.13    0.83
  -9   9  -2    7.32    0.75
   9 -10   2    4.36    0.84
  -9  10  -2    2.89    0.63
   9 -11   2   -0.14    0.43
  -9  11  -2   -0.06    0.32
   9 -12   2    4.73    0.98
  -9  12  -2    3.61    0.83
  -8 -13  -2   -0.02    0.26
   8  12   2    9.31    1.11
  -8 -12  -2   10.17    0.79
  -8 -12  -2    8.78    1.02
   8  11   2    0.35    0.37
  -8 -11  -2    1.05    0.42
  -8 -11  -2    0.82    0.30
   8  10   2    0.11    0.34
  -8 -10  -2   -0.03    0.32
  -8 -10  -2   -0.19    0.30
  -8 -10  -2    0.51    0.25
   8   9   2    0.21    0.27
  -8  -9  -2    0.16    0.21
  -8  -9  -2    0.04    0.28
   8   8   2   13.95    0.94
   8   8   2   14.39    0.69
  -8  -8  -2   15.15    0.96
  -8  -8  -2   13.94    0.69
  -8  -8  -2   13.72    0.76
   8   7   2    0.71    0.29
   8   7   2    0.40    0.16
   8   7   2    0.58    0.28
  -8  -7  -2    0.55    0.25
  -8  -7  -2    0.27    0.18
  -8  -7  -2    0.72    0.19
   8   6   2   10.83    0.47
   8   6   2   11.47    0.63
   8   6   2   11.49    0.74
   8   6   2   10.58    0.72
  -8  -6  -2   11.21    0.63
  -8  -6  -2   11.97    0.82
  -8  -6  -2   10.61    0.57
   8   5   2   -0.12    0.12
   8   5   2    0.07    0.15
   8   5   2   -0.14    0.16
   8   5   2    0.28    0.24
   8   5   2    0.11    0.10
  -8  -5  -2    0.03    0.15
  -8  -5  -2    0.08    0.13
  -8  -5  -2    0.06    0.18
  -8  -5  -2    0.00    0.12
   8   4   2   14.24    0.73
   8   4   2   12.63    0.79
   8   4   2   13.67    0.73
   8   4   2   13.56    0.61
   8   4   2   15.04    0.74
   8   4   2   14.07    0.54
  -8  -4  -2   13.70    0.65
  -8  -4  -2   12.36    0.70
  -8  -4  -2   14.63    0.79
  -8  -4  -2   14.19    0.70
   8   3   2    2.38    0.38
   8   3   2    2.01    0.34
   8   3   2    1.78    0.21
   8   3   2    2.50    0.30
   8   3   2    2.23    0.26
   8   3   2    1.58    0.30
  -8  -3  -2    1.39    0.29
  -8  -3  -2    1.68    0.30
  -8  -3  -2    1.89    0.31
   8   2   2   46.47    1.63
   8   2   2   46.48    1.56
   8   2   2   45.54    1.52
   8   2   2   44.93    1.47
   8   2   2   43.05    1.61
  -8  -2  -2   44.35    1.59
  -8  -2  -2   46.36    1.56
  -8  -2  -2   45.75    1.57
  -8  -2  -2   43.84    1.60
   8   1   2    0.26    0.17
   8   1   2    0.65    0.18
   8   1   2    0.82    0.23
   8   1   2    0.41    0.16
  -8  -1  -2    0.65    0.19
  -8  -1  -2    0.31    0.16
  -8  -1  -2    0.51    0.18
  -8  -1  -2    0.99    0.16
  -8  -1  -2    0.76    0.20
   8   0   2   59.74    2.03
   8   0   2   58.28    1.98
   8   0   2   60.75    1.98
   8   0   2   59.66    1.84
   8   0   2   57.03    2.00
  -8   0  -2   62.30    1.77
  -8   0  -2   61.31    2.05
  -8   0  -2   58.19    2.02
  -8   0  -2   56.78    2.02
  -8   0  -2   59.56    1.89
   8  -1   2    0.47    0.18
   8  -1   2    0.42    0.17
   8  -1   2    1.25    0.27
   8  -1   2    0.85    0.22
  -8   1  -2    0.21    0.17
  -8   1  -2    0.80    0.22
  -8   1  -2    1.14    0.22
  -8   1  -2    0.65    0.19
   8  -2   2   47.10    1.67
   8  -2   2   47.14    1.62
   8  -2   2   43.96    1.68
  -8   2  -2   43.23    1.63
  -8   2  -2   46.05    1.60
  -8   2  -2   43.50    1.69
   8  -3   2    2.34    0.36
   8  -3   2    1.90    0.43
   8  -3   2    2.12    0.36
  -8   3  -2    2.09    0.44
  -8   3  -2    1.88    0.35
  -8   3  -2    1.54    0.35
   8  -4   2   13.29    0.77
   8  -4   2   13.92    0.85
   8  -4   2   13.27    0.77
  -8   4  -2   14.47    0.52
  -8   4  -2   13.13    0.77
  -8   4  -2   14.39    0.74
  -8   4  -2   12.59    0.82
   8  -5   2    0.02    0.20
   8  -5   2   -0.01    0.16
   8  -5   2    0.01    0.19
  -8   5  -2   -0.08    0.20
  -8   5  -2    0.19    0.19
  -8   5  -2   -0.18    0.09
  -8   5  -2    0.13    0.15
   8  -6   2   11.60    0.85
   8  -6   2   10.65    0.69
  -8   6  -2   11.72    0.73
  -8   6  -2    9.81    0.67
  -8   6  -2   10.44    0.58
  -8   6  -2   12.06    0.83
   8  -7   2    0.47    0.33
   8  -7   2    0.60    0.23
  -8   7  -2    0.02    0.21
  -8   7  -2    0.20    0.23
  -8   7  -2    0.24    0.19
   8  -8   2   14.50    1.04
  -8   8  -2   13.76    0.89
  -8   8  -2   13.92    0.99
  -8   8  -2   12.47    0.79
   8  -9   2   -0.08    0.25
   8  -9   2    0.29    0.36
  -8   9  -2   -0.11    0.16
  -8   9  -2    0.27    0.26
  -8   9  -2   -0.21    0.23
   8 -10   2    0.39    0.40
  -8  10  -2    0.42    0.33
   8 -11   2    0.91    0.49
  -8  11  -2    1.06    0.40
   8 -12   2   10.66    1.21
  -8  12  -2   10.89    1.04
   8 -13   2   -0.28    0.41
  -7 -13  -2    0.58    0.32
   7  12   2   30.02    1.76
  -7 -12  -2   25.61    1.59
  -7 -12  -2   28.10    1.35
   7  11   2    2.61    0.69
  -7 -11  -2    0.90    0.42
  -7 -11  -2    2.49    0.52
   7  10   2    9.61    0.92
  -7 -10  -2   12.81    1.01
  -7 -10  -2   10.16    0.72
  -7 -10  -2   11.08    0.92
   7   9   2   33.15    1.65
  -7  -9  -2   33.61    1.61
  -7  -9  -2   33.57    1.37
   7   8   2    0.27    0.26
   7   8   2    0.34    0.14
  -7  -8  -2    0.26    0.26
  -7  -8  -2    0.38    0.20
  -7  -8  -2    0.48    0.18
   7   7   2   69.24    2.14
   7   7   2   65.70    2.44
  -7  -7  -2   65.98    2.16
  -7  -7  -2   65.74    2.23
  -7  -7  -2   70.40    2.40
   7   6   2   15.66    0.70
   7   6   2   14.80    0.86
   7   6   2   15.24    0.87
  -7  -6  -2   14.35    0.72
  -7  -6  -2   15.72    0.68
  -7  -6  -2   15.18    0.84
  -7  -6  -2   15.71    0.95
   7   5   2   -0.07    0.12
   7   5   2    0.07    0.18
   7   5   2    0.35    0.18
   7   5   2    0.33    0.11
  -7  -5  -2    0.33    0.19
  -7  -5  -2    0.32    0.16
  -7  -5  -2    0.24    0.13
  -7  -5  -2    0.12    0.19
  -7  -5  -2   -0.06    0.14
   7   4   2  194.06    4.99
   7   4   2  187.77    5.46
   7   4   2  186.53    5.55
   7   4   2  187.68    5.66
   7   4   2  194.21    5.53
   7   4   2  188.36    5.41
  -7  -4  -2  188.28    5.56
  -7  -4  -2  194.88    5.52
  -7  -4  -2  194.42    5.63
  -7  -4  -2  187.25    5.51
   7   3   2   23.13    0.91
   7   3   2   22.36    0.86
   7   3   2   23.37    0.94
   7   3   2   22.34    0.92
   7   3   2   22.79    0.75
   7   3   2   23.02    1.02
  -7  -3  -2   24.30    0.99
  -7  -3  -2   21.87    0.93
  -7  -3  -2   23.39    0.92
   7   2   2   30.90    1.13
   7   2   2   33.59    1.09
   7   2   2   30.17    1.21
   7   2   2   32.58    1.13
   7   2   2   32.76    1.20
   7   2   2   30.89    0.97
  -7  -2  -2   31.82    1.16
  -7  -2  -2   30.99    1.16
  -7  -2  -2   30.91    1.18
  -7  -2  -2   31.34    1.14
   7   1   2   61.62    2.01
   7   1   2   64.72    1.94
   7   1   2   60.22    2.02
   7   1   2   63.46    2.05
  -7  -1  -2   61.78    1.95
  -7  -1  -2   62.83    2.03
  -7  -1  -2   60.10    2.04
  -7  -1  -2   63.19    2.05
  -7  -1  -2   61.91    2.07
  -7  -1  -2   61.31    1.76
   7   0   2    1.73    0.25
   7   0   2    1.10    0.22
   7   0   2    1.23    0.14
   7   0   2    1.55    0.25
   7   0   2    1.32    0.23
  -7   0  -2    1.48    0.21
  -7   0  -2    1.41    0.24
  -7   0  -2    0.89    0.23
  -7   0  -2    1.43    0.19
  -7   0  -2    1.55    0.24
  -7   0  -2    1.26    0.26
   7  -1   2   60.89    2.09
   7  -1   2   64.05    2.02
   7  -1   2   59.07    2.03
   7  -1   2   65.18    2.10
  -7   1  -2   67.65    2.06
  -7   1  -2   59.84    2.10
  -7   1  -2   65.52    2.14
  -7   1  -2   59.98    2.06
   7  -2   2   32.31    1.20
   7  -2   2   30.85    1.27
   7  -2   2   31.94    1.24
  -7   2  -2   32.03    1.19
  -7   2  -2   33.26    1.30
  -7   2  -2   30.67    1.22
  -7   2  -2   33.50    1.32
   7  -3   2   23.56    1.00
   7  -3   2   22.44    1.06
   7  -3   2   23.84    1.01
  -7   3  -2   23.74    1.08
  -7   3  -2   23.13    0.96
  -7   3  -2   23.09    1.01
  -7   3  -2   22.80    0.72
   7  -4   2  186.18    5.55
   7  -4   2  184.38    5.79
   7  -4   2  196.20    5.65
  -7   4  -2  194.53    5.62
  -7   4  -2  188.85    5.79
  -7   4  -2  198.31    5.60
  -7   4  -2  187.88    5.49
   7  -5   2   -0.13    0.15
   7  -5   2    0.19    0.24
  -7   5  -2    0.35    0.17
  -7   5  -2    0.41    0.19
  -7   5  -2    0.11    0.20
   7  -6   2   14.20    0.92
   7  -6   2   16.15    0.83
  -7   6  -2   14.26    0.77
  -7   6  -2   17.20    0.97
  -7   6  -2   15.16    0.83
   7  -7   2   70.77    2.63
  -7   7  -2   69.73    2.39
  -7   7  -2   69.77    2.02
  -7   7  -2   66.48    2.32
  -7   7  -2   70.99    2.59
   7  -8   2    0.44    0.30
  -7   8  -2    0.85    0.23
  -7   8  -2    0.63    0.30
  -7   8  -2    0.47    0.26
   7  -9   2   31.78    1.19
   7  -9   2   36.17    1.74
   7  -9   2   33.11    1.70
  -7   9  -2   35.21    1.39
  -7   9  -2   34.67    1.64
  -7   9  -2   35.15    1.54
   7 -10   2   10.56    1.01
  -7  10  -2   10.99    0.88
   7 -11   2    1.05    0.47
  -7  11  -2    1.47    0.44
   7 -12   2   27.77    1.69
  -7  12  -2   28.24    1.54
   7 -13   2    1.26    0.56
  -6 -13  -2    7.03    0.76
   6  12   2    6.76    0.97
  -6 -12  -2    7.86    0.94
  -6 -12  -2    9.97    0.84
   6  11   2   18.64    1.33
  -6 -11  -2   19.36    1.07
  -6 -11  -2   17.91    1.20
   6  10   2   -0.08    0.29
  -6 -10  -2    0.90    0.37
  -6 -10  -2    0.75    0.33
  -6 -10  -2    0.92    0.28
   6   9   2   -0.25    0.23
  -6  -9  -2   -0.04    0.17
  -6  -9  -2    0.22    0.30
  -6  -9  -2   -0.04    0.18
  -6  -9  -2    0.00    0.24
   6   8   2    0.18    0.10
   6   8   2    0.10    0.25
  -6  -8  -2    0.17    0.26
  -6  -8  -2    0.24    0.17
  -6  -8  -2    0.03    0.17
   6   7   2    3.15    0.28
   6   7   2    1.94    0.44
  -6  -7  -2    2.72    0.37
  -6  -7  -2    3.60    0.35
  -6  -7  -2    3.22    0.47
   6   6   2    5.55    0.53
   6   6   2    5.89    0.38
  -6  -6  -2    5.66    0.51
  -6  -6  -2    5.68    0.40
  -6  -6  -2    6.29    0.60
  -6  -6  -2    6.19    0.44
   6   5   2   85.40    2.65
   6   5   2   86.02    2.83
   6   5   2   87.41    2.77
   6   5   2   88.81    2.60
  -6  -5  -2   88.82    2.66
  -6  -5  -2   88.31    2.71
  -6  -5  -2   90.24    2.92
  -6  -5  -2   83.90    2.64
  -6  -5  -2   85.77    2.73
   6   4   2   58.99    1.87
   6   4   2   59.32    1.91
   6   4   2   55.93    1.94
   6   4   2   55.33    1.80
  -6  -4  -2   59.80    1.89
  -6  -4  -2   57.42    1.83
  -6  -4  -2   59.31    2.02
  -6  -4  -2   54.60    1.85
  -6  -4  -2   62.27    1.91
   6   3   2  182.61    4.71
   6   3   2  180.53    5.21
   6   3   2  184.18    5.21
   6   3   2  175.51    5.18
   6   3   2  177.35    5.29
   6   3   2  182.27    5.05
  -6  -3  -2  182.66    5.26
  -6  -3  -2  180.24    5.25
  -6  -3  -2  180.22    5.20
   6   2   2    8.00    0.48
   6   2   2    7.06    0.40
   6   2   2    7.21    0.39
   6   2   2    7.25    0.32
   6   2   2    7.31    0.38
   6   2   2    6.96    0.42
  -6  -2  -2    7.05    0.41
  -6  -2  -2    6.78    0.43
  -6  -2  -2    6.68    0.41
  -6  -2  -2    6.21    0.39
   6   1   2   33.94    1.22
   6   1   2   33.62    1.19
   6   1   2   35.76    1.16
   6   1   2   34.92    1.23
  -6  -1  -2   33.50    1.22
  -6  -1  -2   33.99    1.16
  -6  -1  -2   34.21    1.03
  -6  -1  -2   34.65    1.21
  -6  -1  -2   33.81    1.22
   6   0   2    0.90    0.21
   6   0   2    1.37    0.22
   6   0   2    1.04    0.22
   6   0   2    0.93    0.20
  -6   0  -2    1.50    0.20
  -6   0  -2    1.18    0.21
  -6   0  -2    1.17    0.23
  -6   0  -2    0.86    0.19
  -6   0  -2    0.65    0.20
  -6   0  -2    1.05    0.17
  -6   0  -2    1.05    0.21
   6  -1   2   35.47    1.28
   6  -1   2   33.04    1.25
   6  -1   2   34.63    1.22
   6  -1   2   33.91    1.24
   6  -1   2   33.48    1.19
  -6   1  -2   34.64    1.28
  -6   1  -2   33.21    1.24
  -6   1  -2   34.91    1.21
  -6   1  -2   36.24    1.30
  -6   1  -2   34.83    1.19
   6  -2   2    6.55    0.43
   6  -2   2    7.17    0.48
   6  -2   2    7.29    0.48
   6  -2   2    7.20    0.46
  -6   2  -2    6.40    0.47
  -6   2  -2    7.55    0.51
  -6   2  -2    7.51    0.44
  -6   2  -2    7.53    0.43
  -6   2  -2    7.26    0.46
  -6   2  -2    6.96    0.42
   6  -3   2  182.78    5.55
   6  -3   2  207.99    5.59
   6  -3   2  178.93    5.30
   6  -3   2  181.45    5.41
  -6   3  -2  197.53    5.13
  -6   3  -2  173.30    5.38
  -6   3  -2  185.17    5.27
  -6   3  -2  178.73    5.54
  -6   3  -2  186.79    5.38
   6  -4   2   61.55    1.97
   6  -4   2   58.24    1.94
   6  -4   2   52.80    2.02
   6  -4   2   55.39    2.05
  -6   4  -2   57.31    2.04
  -6   4  -2   55.18    1.91
  -6   4  -2   58.34    1.80
  -6   4  -2   57.93    1.88
   6  -5   2   86.31    2.80
   6  -5   2   84.66    2.96
  -6   5  -2   86.44    2.77
  -6   5  -2   92.98    2.61
  -6   5  -2   89.35    2.76
  -6   5  -2   88.55    2.94
   6  -6   2    6.32    0.59
   6  -6   2    6.32    0.49
  -6   6  -2    6.24    0.40
  -6   6  -2    6.35    0.48
  -6   6  -2    5.88    0.51
  -6   6  -2    6.04    0.55
   6  -7   2    3.19    0.56
  -6   7  -2    3.11    0.38
  -6   7  -2    3.34    0.48
  -6   7  -2    2.13    0.28
  -6   7  -2    2.66    0.44
   6  -8   2    0.12    0.14
   6  -8   2   -0.03    0.24
   6  -8   2   -0.05    0.29
  -6   8  -2    0.20    0.16
  -6   8  -2    0.32    0.25
  -6   8  -2    0.30    0.21
  -6   8  -2   -0.01    0.13
   6  -9   2    0.00    0.13
   6  -9   2    0.02    0.26
   6  -9   2   -0.16    0.28
  -6   9  -2   -0.01    0.24
  -6   9  -2    0.09    0.15
  -6   9  -2    0.33    0.26
   6 -10   2    0.97    0.40
   6 -10   2    0.72    0.39
  -6  10  -2    0.88    0.34
   6 -11   2   18.90    1.36
  -6  11  -2   20.66    1.23
   6 -12   2    8.85    1.07
  -6  12  -2    9.96    0.95
   6 -13   2    8.61    1.06
  -5 -13  -2    5.46    0.77
   5  12   2    6.41    0.93
  -5 -12  -2    5.88    0.74
   5  11   2    1.72    0.51
  -5 -11  -2    2.09    0.56
  -5 -11  -2    2.55    0.63
   5  10   2    0.75    0.36
  -5 -10  -2    1.04    0.38
  -5 -10  -2    1.85    0.49
  -5 -10  -2    1.17    0.31
   5   9   2   10.26    0.89
  -5  -9  -2   11.82    0.83
  -5  -9  -2   12.46    0.69
  -5  -9  -2   11.29    0.88
  -5  -9  -2   12.46    0.77
   5   8   2    6.26    0.68
   5   8   2    7.19    0.59
  -5  -8  -2    6.56    0.54
  -5  -8  -2    7.14    0.71
  -5  -8  -2    7.14    0.50
   5   7   2   58.88    1.78
   5   7   2   58.02    2.21
  -5  -7  -2   57.30    1.99
  -5  -7  -2   59.10    1.94
  -5  -7  -2   61.08    2.17
   5   6   2    0.62    0.24
   5   6   2    0.86    0.17
  -5  -6  -2    0.88    0.27
  -5  -6  -2    0.57    0.16
  -5  -6  -2    0.55    0.17
  -5  -6  -2    0.03    0.19
   5   5   2   56.40    1.94
   5   5   2   56.52    1.99
   5   5   2   57.39    1.77
   5   5   2   55.83    1.76
  -5  -5  -2   58.21    1.93
  -5  -5  -2   55.78    1.85
  -5  -5  -2   55.45    1.81
  -5  -5  -2   57.58    1.74
  -5  -5  -2   58.57    2.07
   5   4   2   95.35    2.73
   5   4   2   92.21    2.86
   5   4   2   90.20    2.71
   5   4   2   92.33    2.78
  -5  -4  -2   95.67    2.64
  -5  -4  -2   91.33    2.91
  -5  -4  -2   88.56    2.74
  -5  -4  -2   87.26    2.71
  -5  -4  -2   92.40    2.74
  -5  -4  -2   88.82    2.77
   5   3   2    4.39    0.29
   5   3   2    4.40    0.35
   5   3   2    4.79    0.34
   5   3   2    4.96    0.33
  -5  -3  -2    4.97    0.33
  -5  -3  -2    4.31    0.29
  -5  -3  -2    4.97    0.35
  -5  -3  -2    5.16    0.39
  -5  -3  -2    4.95    0.33
  -5  -3  -2    5.63    0.34
   5   2   2    2.64    0.25
   5   2   2    2.71    0.28
   5   2   2    2.56    0.18
   5   2   2    2.78    0.22
   5   2   2    2.71    0.24
   5   2   2    2.75    0.23
   5   2   2    2.40    0.22
  -5  -2  -2    2.63    0.24
  -5  -2  -2    2.37    0.25
  -5  -2  -2    2.15    0.25
  -5  -2  -2    2.27    0.23
  -5  -2  -2    2.46    0.22
   5   1   2  299.59    8.39
   5   1   2  306.68    8.44
   5   1   2  288.63    7.72
   5   1   2  297.65    8.34
   5   1   2  300.15    8.51
   5   1   2  312.14    8.53
  -5  -1  -2  310.88    8.43
  -5  -1  -2  289.45    7.71
  -5  -1  -2  299.39    8.35
  -5  -1  -2  311.36    8.53
  -5  -1  -2  295.63    8.43
  -5  -1  -2  313.29    8.03
  -5  -1  -2  289.83    8.53
   5   0   2  102.85    2.97
   5   0   2   95.48    2.93
   5   0   2   99.22    2.96
   5   0   2   94.08    2.88
  -5   0  -2   99.17    2.97
  -5   0  -2  101.33    2.90
  -5   0  -2  101.68    2.97
  -5   0  -2   97.22    2.65
  -5   0  -2   94.23    2.85
  -5   0  -2   95.57    2.92
   5  -1   2  299.31    8.37
   5  -1   2  302.17    8.70
   5  -1   2  329.31    8.72
   5  -1   2  280.96    8.48
   5  -1   2  309.09    8.58
  -5   1  -2  295.49    8.71
  -5   1  -2  315.96    8.73
  -5   1  -2  317.17    8.51
  -5   1  -2  300.01    8.57
   5  -2   2    2.64    0.29
   5  -2   2    2.42    0.26
   5  -2   2    2.75    0.30
   5  -2   2    2.44    0.26
  -5   2  -2    2.70    0.30
  -5   2  -2    2.42    0.25
  -5   2  -2    2.92    0.12
  -5   2  -2    2.73    0.31
  -5   2  -2    2.09    0.25
   5  -3   2    5.27    0.41
   5  -3   2    5.06    0.36
   5  -3   2    5.26    0.43
   5  -3   2    5.08    0.37
  -5   3  -2    4.63    0.25
  -5   3  -2    4.59    0.35
  -5   3  -2    4.10    0.33
  -5   3  -2    4.48    0.39
   5  -4   2   87.65    2.94
   5  -4   2   89.77    2.95
   5  -4   2   95.01    2.83
  -5   4  -2   92.03    2.80
  -5   4  -2   92.50    2.93
  -5   4  -2   89.26    2.75
   5  -5   2   57.83    2.06
   5  -5   2   57.27    1.90
  -5   5  -2   54.30    2.00
  -5   5  -2   55.83    1.89
  -5   5  -2   59.02    1.73
  -5   5  -2   56.71    1.87
   5  -6   2    0.63    0.27
  -5   6  -2    0.68    0.25
  -5   6  -2    0.74    0.22
  -5   6  -2    0.86    0.14
  -5   6  -2    0.99    0.25
  -5   6  -2    0.82    0.16
   5  -7   2   59.29    2.19
   5  -7   2   56.67    2.19
  -5   7  -2   57.97    2.05
  -5   7  -2   60.00    1.74
  -5   7  -2   56.40    1.92
  -5   7  -2   57.54    2.14
   5  -8   2    8.30    0.75
   5  -8   2    6.78    0.71
   5  -8   2    6.90    0.39
  -5   8  -2    7.22    0.63
  -5   8  -2    7.53    0.65
  -5   8  -2    7.55    0.39
  -5   8  -2    7.06    0.50
   5  -9   2   12.39    0.96
   5  -9   2   11.31    0.90
  -5   9  -2   11.92    0.85
  -5   9  -2   11.18    0.62
   5 -10   2    0.74    0.37
   5 -10   2    1.07    0.42
  -5  10  -2    0.93    0.33
   5 -11   2    2.93    0.73
  -5  11  -2    2.72    0.75
  -5  11  -2    2.62    0.61
   5 -12   2    8.81    0.99
  -5  12  -2    6.70    1.07
  -5  12  -2    6.41    0.83
   5 -13   2    6.68    0.96
  -4 -13  -2    8.52    0.88
   4  12   2    0.56    0.49
  -4 -12  -2   -0.45    0.28
   4  11   2   17.84    1.31
  -4 -11  -2   19.60    1.12
  -4 -11  -2   19.85    1.13
   4  10   2    0.14    0.29
  -4 -10  -2   -0.09    0.21
  -4 -10  -2    0.17    0.33
  -4 -10  -2    0.05    0.22
   4   9   2    0.49    0.35
   4   9   2    0.55    0.25
  -4  -9  -2    0.68    0.26
  -4  -9  -2    0.76    0.25
  -4  -9  -2    0.44    0.30
  -4  -9  -2    0.86    0.24
   4   8   2    2.23    0.57
   4   8   2    2.65    0.40
   4   8   2    2.03    0.27
  -4  -8  -2    2.51    0.49
  -4  -8  -2    2.03    0.38
  -4  -8  -2    2.20    0.35
   4   7   2    9.11    0.73
   4   7   2   10.01    0.64
  -4  -7  -2   10.12    0.56
  -4  -7  -2   10.18    0.72
  -4  -7  -2    9.99    0.61
   4   6   2    0.93    0.15
   4   6   2    1.21    0.33
  -4  -6  -2    1.23    0.28
  -4  -6  -2    1.16    0.24
  -4  -6  -2    0.84    0.25
  -4  -6  -2    0.89    0.29
   4   5   2   73.87    2.23
   4   5   2   73.55    2.17
   4   5   2   73.63    2.45
  -4  -5  -2   72.99    2.12
  -4  -5  -2   75.91    2.53
  -4  -5  -2   72.94    2.36
  -4  -5  -2   73.13    2.31
  -4  -5  -2   72.60    2.27
   4   4   2   31.80    1.04
   4   4   2   30.71    1.21
   4   4   2   32.26    1.06
   4   4   2   31.60    1.17
  -4  -4  -2   30.97    1.03
  -4  -4  -2   30.95    1.10
  -4  -4  -2   30.43    1.03
  -4  -4  -2   32.34    1.26
  -4  -4  -2   33.39    1.18
  -4  -4  -2   31.23    1.07
   4   3   2   49.66    1.59
   4   3   2   50.91    1.56
   4   3   2   50.75    1.56
   4   3   2   52.20    1.57
   4   3   2   51.44    1.66
  -4  -3  -2   52.97    1.52
  -4  -3  -2   48.34    1.54
  -4  -3  -2   51.20    1.69
  -4  -3  -2   48.22    1.59
  -4  -3  -2   50.36    1.58
  -4  -3  -2   46.72    1.55
   4   2   2   18.07    0.67
   4   2   2   16.82    0.63
   4   2   2   18.42    0.65
   4   2   2   17.02    0.68
   4   2   2   18.56    0.66
  -4  -2  -2   17.14    0.71
  -4  -2  -2   18.28    0.66
  -4  -2  -2   17.25    0.67
  -4  -2  -2   17.20    0.63
  -4  -2  -2   16.52    0.66
   4   1   2   12.61    0.51
   4   1   2   12.99    0.45
   4   1   2   12.67    0.53
   4   1   2   12.39    0.54
   4   1   2   13.60    0.54
   4   1   2   13.18    0.46
   4   1   2   13.29    0.55
  -4  -1  -2   13.07    0.45
  -4  -1  -2   13.98    0.54
  -4  -1  -2   12.78    0.55
  -4  -1  -2   13.20    0.54
  -4  -1  -2   13.23    0.54
   4   0   2    3.35    0.24
   4   0   2    3.32    0.23
   4   0   2    3.01    0.25
   4   0   2    3.40    0.25
   4   0   2    3.35    0.27
  -4   0  -2    3.02    0.20
  -4   0  -2    3.05    0.23
  -4   0  -2    3.53    0.25
  -4   0  -2    2.93    0.26
  -4   0  -2    2.93    0.25
  -4   0  -2    3.00    0.25
   4  -1   2   13.64    0.59
   4  -1   2   12.59    0.57
   4  -1   2   12.96    0.53
   4  -1   2   13.55    0.58
  -4   1  -2   13.42    0.59
  -4   1  -2   13.18    0.54
  -4   1  -2   12.21    0.55
  -4   1  -2   13.75    0.60
   4  -2   2   16.85    0.67
   4  -2   2   17.43    0.74
   4  -2   2   16.63    0.70
   4  -2   2   16.87    0.73
  -4   2  -2   17.64    0.74
  -4   2  -2   18.38    0.77
  -4   2  -2   17.99    0.57
  -4   2  -2   17.04    0.70
  -4   2  -2   17.59    0.66
   4  -3   2   49.59    1.60
   4  -3   2   50.60    1.63
   4  -3   2   48.10    1.70
   4  -3   2   45.07    1.68
  -4   3  -2   53.44    1.59
  -4   3  -2   48.88    1.69
  -4   3  -2   49.37    1.57
  -4   3  -2   53.45    1.77
  -4   3  -2   50.86    1.62
   4  -4   2   30.14    1.13
   4  -4   2   31.92    1.26
   4  -4   2   34.85    1.27
  -4   4  -2   30.36    1.12
  -4   4  -2   31.24    1.12
  -4   4  -2   31.53    1.22
   4  -5   2   89.17    2.63
   4  -5   2   75.24    2.57
  -4   5  -2   72.07    2.50
  -4   5  -2   74.85    2.37
  -4   5  -2   73.97    2.40
   4  -6   2    0.58    0.24
  -4   6  -2    0.72    0.22
  -4   6  -2    1.11    0.15
  -4   6  -2    1.25    0.31
  -4   6  -2    0.65    0.17
  -4   6  -2    0.84    0.23
   4  -7   2    8.87    0.72
   4  -7   2   10.12    0.77
   4  -7   2    9.43    0.43
  -4   7  -2    9.70    0.67
  -4   7  -2    9.52    0.43
  -4   7  -2    9.90    0.67
  -4   7  -2   10.51    0.54
   4  -8   2    1.75    0.47
   4  -8   2    1.78    0.50
  -4   8  -2    2.35    0.42
  -4   8  -2    2.32    0.21
  -4   8  -2    2.41    0.47
  -4   8  -2    2.87    0.32
   4  -9   2    1.02    0.37
   4  -9   2    1.88    0.47
  -4   9  -2    0.82    0.18
  -4   9  -2    0.73    0.30
  -4   9  -2    0.59    0.26
   4 -10   2    0.13    0.28
   4 -10   2   -0.41    0.27
  -4  10  -2   -0.30    0.23
   4 -11   2   21.59    1.31
  -4  11  -2   18.68    1.49
  -4  11  -2   20.41    1.24
   4 -12   2   -0.15    0.35
  -4  12  -2    0.34    0.45
  -4  12  -2   -0.36    0.36
   4 -13   2   10.03    1.04
  -3 -13  -2    0.50    0.38
   3  12   2    3.08    0.74
  -3 -12  -2    1.73    0.46
   3  11   2    1.27    0.46
  -3 -11  -2    2.57    0.51
  -3 -11  -2    1.45    0.41
   3  10   2    1.40    0.45
  -3 -10  -2    0.91    0.27
  -3 -10  -2    0.62    0.34
  -3 -10  -2    0.75    0.29
   3   9   2    0.83    0.39
   3   9   2    0.93    0.28
  -3  -9  -2    0.54    0.25
  -3  -9  -2    0.51    0.23
  -3  -9  -2    1.28    0.37
  -3  -9  -2    0.37    0.23
   3   8   2   51.15    1.79
   3   8   2   48.52    1.66
   3   8   2   47.50    2.03
  -3  -8  -2   49.97    1.84
  -3  -8  -2   46.18    1.80
  -3  -8  -2   48.77    1.96
  -3  -8  -2   50.42    1.76
   3   7   2   25.55    1.27
   3   7   2   25.43    1.08
  -3  -7  -2   25.25    1.09
  -3  -7  -2   26.23    1.05
  -3  -7  -2   27.21    1.24
   3   6   2    3.70    0.36
   3   6   2    3.17    0.44
  -3  -6  -2    3.19    0.32
  -3  -6  -2    3.16    0.36
  -3  -6  -2    3.54    0.45
   3   5   2    5.89    0.26
   3   5   2    6.47    0.51
  -3  -5  -2    6.21    0.31
  -3  -5  -2    5.75    0.52
  -3  -5  -2    5.55    0.37
  -3  -5  -2    5.67    0.40
  -3  -5  -2    5.77    0.47
   3   4   2   16.02    0.77
   3   4   2   16.57    0.57
   3   4   2   16.72    0.64
  -3  -4  -2   16.89    0.81
  -3  -4  -2   16.28    0.59
  -3  -4  -2   16.21    0.74
  -3  -4  -2   16.11    0.57
  -3  -4  -2   16.17    0.65
  -3  -4  -2   15.93    0.67
   3   3   2   61.89    1.93
   3   3   2   64.66    1.95
   3   3   2   62.50    2.03
   3   3   2   63.95    1.95
   3   3   2   64.49    1.89
  -3  -3  -2   66.32    1.95
  -3  -3  -2   65.18    2.07
  -3  -3  -2   67.07    1.84
  -3  -3  -2   63.81    1.89
  -3  -3  -2   63.82    1.97
   3   2   2   18.33    0.66
   3   2   2   18.51    0.72
   3   2   2   19.54    0.68
   3   2   2   19.44    0.68
   3   2   2   17.70    0.66
  -3  -2  -2   18.80    0.66
  -3  -2  -2   18.51    0.69
  -3  -2  -2   18.52    0.66
  -3  -2  -2   18.54    0.73
   3   1   2   73.27    2.17
   3   1   2   73.97    2.02
   3   1   2   73.43    2.16
   3   1   2   77.60    2.19
   3   1   2   70.19    2.14
   3   1   2   71.71    1.96
   3   1   2   72.08    2.17
  -3  -1  -2   73.34    2.18
  -3  -1  -2   76.07    2.20
  -3  -1  -2   72.04    2.15
  -3  -1  -2   73.15    2.16
   3   0   2   61.97    1.88
   3   0   2   63.08    1.87
   3   0   2   63.16    1.89
   3   0   2   59.31    1.82
   3   0   2   60.80    1.82
  -3   0  -2   60.97    1.82
  -3   0  -2   65.60    1.89
  -3   0  -2   63.58    1.83
  -3   0  -2   60.85    1.89
  -3   0  -2   62.06    1.86
  -3   0  -2   61.17    1.69
   3  -1   2   72.24    2.24
   3  -1   2   72.50    2.12
   3  -1   2   74.83    2.25
   3  -1   2   74.26    2.15
   3  -1   2   75.39    2.22
  -3   1  -2   73.84    2.12
  -3   1  -2   73.18    2.21
  -3   1  -2   76.89    2.26
  -3   1  -2   75.36    2.16
  -3   1  -2   74.01    2.25
   3  -2   2   18.68    0.75
   3  -2   2   18.67    0.67
   3  -2   2   19.08    0.72
   3  -2   2   16.58    0.72
  -3   2  -2   19.86    0.76
  -3   2  -2   18.59    0.64
  -3   2  -2   18.14    0.66
  -3   2  -2   19.62    0.77
  -3   2  -2   18.41    0.71
   3  -3   2   62.99    2.08
   3  -3   2   64.97    2.00
   3  -3   2   68.97    2.10
  -3   3  -2   66.45    2.04
  -3   3  -2   63.13    1.94
  -3   3  -2   65.97    1.99
  -3   3  -2   64.31    2.10
  -3   3  -2   63.71    2.07
   3  -4   2   13.92    0.72
   3  -4   2   16.21    0.75
  -3   4  -2   15.99    0.65
  -3   4  -2   16.76    0.68
  -3   4  -2   15.78    0.71
   3  -5   2    6.19    0.47
   3  -5   2    6.65    0.51
  -3   5  -2    6.18    0.45
  -3   5  -2    5.88    0.44
  -3   5  -2    6.25    0.38
  -3   5  -2    6.09    0.31
   3  -6   2    3.23    0.22
   3  -6   2    3.62    0.43
   3  -6   2    4.13    0.45
  -3   6  -2    3.19    0.37
  -3   6  -2    2.88    0.37
  -3   6  -2    3.31    0.29
  -3   6  -2    3.55    0.24
   3  -7   2   27.63    1.24
   3  -7   2   26.28    1.27
  -3   7  -2   26.46    1.16
  -3   7  -2   27.78    0.85
  -3   7  -2   27.08    0.99
   3  -8   2   49.00    2.02
   3  -8   2   48.82    1.95
  -3   8  -2   50.41    1.62
  -3   8  -2   49.86    1.39
  -3   8  -2   49.65    1.87
   3  -9   2    1.10    0.38
  -3   9  -2    0.38    0.25
   3 -10   2    0.86    0.35
   3 -10   2    0.78    0.41
  -3  10  -2    0.84    0.41
  -3  10  -2    0.93    0.33
   3 -11   2    2.27    0.61
  -3  11  -2    1.44    0.51
  -3  11  -2    1.59    0.45
   3 -12   2    1.76    0.49
  -3  12  -2    1.78    0.51
  -3  12  -2    1.71    0.63
   3 -13   2    1.06    0.43
  -2 -13  -2    1.81    0.49
   2  12   2    3.35    0.75
  -2 -12  -2    2.61    0.65
   2  11   2    6.81    0.92
  -2 -11  -2    7.99    0.79
  -2 -11  -2    7.47    0.62
   2  10   2    3.06    0.64
  -2 -10  -2    2.95    0.45
  -2 -10  -2    3.74    0.57
  -2 -10  -2    3.22    0.61
   2   9   2   15.03    0.80
   2   9   2   13.55    1.05
  -2  -9  -2   13.08    0.78
  -2  -9  -2   12.94    0.87
  -2  -9  -2   14.77    1.05
   2   8   2   32.36    1.27
   2   8   2   28.62    1.51
   2   8   2   30.11    1.20
  -2  -8  -2   31.15    1.33
  -2  -8  -2   30.19    1.28
  -2  -8  -2   32.34    1.48
   2   7   2   -0.12    0.16
   2   7   2   -0.20    0.21
  -2  -7  -2    0.17    0.18
  -2  -7  -2   -0.02    0.19
   2   6   2   -0.03    0.12
   2   6   2    0.09    0.19
  -2  -6  -2   -0.18    0.12
  -2  -6  -2   -0.03    0.17
   2   5   2    9.90    0.63
   2   5   2    9.02    0.51
  -2  -5  -2    9.00    0.52
  -2  -5  -2    9.43    0.60
   2   4   2    6.29    0.35
   2   4   2    6.56    0.47
  -2  -4  -2    6.39    0.28
  -2  -4  -2    6.27    0.43
  -2  -4  -2    7.05    0.40
  -2  -4  -2    6.54    0.48
   2   3   2   79.61    2.30
   2   3   2   81.70    2.41
   2   3   2   85.99    2.43
   2   3   2   79.52    2.48
  -2  -3  -2   79.93    2.44
  -2  -3  -2   83.20    2.40
  -2  -3  -2   78.54    2.29
  -2  -3  -2   82.96    2.22
  -2  -3  -2   79.58    2.51
   2   2   2    0.23    0.10
   2   2   2    0.27    0.09
   2   2   2    0.23    0.08
   2   2   2    0.21    0.08
  -2  -2  -2    0.81    0.15
  -2  -2  -2    0.28    0.09
  -2  -2  -2    0.24    0.10
  -2  -2  -2    0.47    0.13
  -2  -2  -2    0.12    0.07
   2   1   2    4.71    0.25
   2   1   2    4.54    0.24
   2   1   2    5.04    0.26
   2   1   2    4.67    0.24
  -2  -1  -2    5.07    0.21
  -2  -1  -2    5.00    0.25
  -2  -1  -2    5.39    0.25
  -2  -1  -2    5.35    0.26
  -2  -1  -2    4.61    0.25
   2   0   2  221.65    6.11
   2   0   2  209.13    5.96
   2   0   2  215.49    5.94
   2   0   2  214.34    6.09
   2   0   2  223.35    6.02
   2   0   2  213.64    5.55
  -2   0  -2  207.68    5.55
  -2   0  -2  219.68    5.94
  -2   0  -2  219.64    6.02
  -2   0  -2  220.74    6.11
  -2   0  -2  211.60    5.96
  -2   0  -2  221.34    6.10
   2  -1   2    5.43    0.27
   2  -1   2    4.79    0.21
   2  -1   2    4.53    0.26
   2  -1   2    4.59    0.19
   2  -1   2    4.86    0.26
  -2   1  -2    5.25    0.28
  -2   1  -2    4.99    0.27
  -2   1  -2    4.96    0.21
  -2   1  -2    4.66    0.25
   2  -2   2    0.21    0.08
   2  -2   2    0.22    0.09
   2  -2   2    0.14    0.09
  -2   2  -2    0.13    0.07
  -2   2  -2    0.28    0.11
  -2   2  -2    0.41    0.13
  -2   2  -2    0.44    0.11
  -2   2  -2    0.12    0.08
   2  -3   2   82.75    2.54
   2  -3   2   84.13    2.47
  -2   3  -2   82.64    2.57
  -2   3  -2   82.70    2.40
  -2   3  -2   81.45    2.44
  -2   3  -2   87.02    2.56
  -2   3  -2   81.03    2.52
   2  -4   2    5.99    0.41
   2  -4   2    6.09    0.42
   2  -4   2    6.48    0.45
   2  -4   2    6.62    0.25
  -2   4  -2    6.69    0.32
  -2   4  -2    6.85    0.41
  -2   4  -2    6.25    0.35
   2  -5   2    9.08    0.61
   2  -5   2    9.95    0.58
  -2   5  -2   10.20    0.44
  -2   5  -2    9.99    0.54
  -2   5  -2   10.23    0.46
   2  -6   2   -0.20    0.13
   2  -6   2   -0.08    0.14
  -2   6  -2    0.02    0.07
  -2   6  -2   -0.01    0.13
   2  -7   2   -0.01    0.21
   2  -7   2    0.04    0.21
  -2   7  -2   -0.18    0.15
  -2   7  -2    0.06    0.10
   2  -8   2   29.55    1.39
   2  -8   2   32.08    1.51
  -2   8  -2   32.21    1.08
  -2   8  -2   31.21    1.31
   2  -9   2   14.65    1.03
   2  -9   2   13.61    0.92
  -2   9  -2   13.35    0.83
  -2   9  -2   13.55    0.57
   2 -10   2    3.86    0.62
   2 -10   2    5.14    0.71
  -2  10  -2    3.90    0.72
   2 -11   2    6.77    0.79
  -2  11  -2    7.42    0.94
   2 -12   2    3.47    0.72
  -2  12  -2    2.21    0.64
   2 -13   2    2.76    0.67
  -1 -13  -2    4.49    0.76
   1  12   2    0.09    0.45
  -1 -12  -2    1.00    0.43
   1  11   2    0.66    0.45
  -1 -11  -2    1.17    0.39
   1  10   2    0.91    0.39
  -1 -10  -2    1.27    0.41
  -1 -10  -2    0.83    0.33
  -1 -10  -2    1.71    0.36
   1   9   2  127.28    4.39
  -1  -9  -2  132.70    4.27
  -1  -9  -2  127.25    4.18
  -1  -9  -2  130.21    4.02
   1   8   2   43.26    1.98
   1   8   2   46.03    1.69
  -1  -8  -2   48.12    1.68
  -1  -8  -2   46.11    1.91
  -1  -8  -2   47.37    1.82
   1   7   2  104.23    3.17
   1   7   2  101.08    3.49
  -1  -7  -2  103.19    3.35
  -1  -7  -2  109.62    3.41
   1   6   2    8.37    0.49
   1   6   2    6.45    0.61
  -1  -6  -2    8.48    0.60
  -1  -6  -2    8.35    0.54
   1   5   2   18.94    0.93
   1   5   2   19.38    0.79
  -1  -5  -2   19.77    0.85
  -1  -5  -2   19.45    0.81
  -1  -5  -2   19.40    0.90
   1   4   2   15.60    0.77
   1   4   2   17.44    0.69
  -1  -4  -2   16.96    0.75
  -1  -4  -2   17.07    0.50
  -1  -4  -2   15.31    0.67
  -1  -4  -2   15.95    0.70
  -1  -4  -2   17.94    0.82
   1   3   2  200.38    5.39
   1   3   2  199.73    5.56
   1   3   2  191.72    5.56
   1   3   2  198.80    5.55
  -1  -3  -2  184.80    5.56
  -1  -3  -2  193.22    5.55
  -1  -3  -2  201.96    5.59
  -1  -3  -2  186.30    5.31
   1   2   2    9.36    0.40
   1   2   2    9.13    0.43
   1   2   2    8.70    0.38
   1   2   2    9.38    0.40
  -1  -2  -2    9.16    0.40
  -1  -2  -2    9.02    0.31
  -1  -2  -2    8.83    0.43
  -1  -2  -2    8.42    0.38
   1   1   2  519.65   14.89
   1   1   2  523.07   14.82
   1   1   2  525.25   14.65
  -1  -1  -2  533.27   14.69
  -1  -1  -2  533.04   14.80
  -1  -1  -2  528.75   14.80
   1   0   2   27.18    0.77
   1   0   2   26.01    0.75
   1   0   2   27.57    0.83
   1   0   2   26.83    0.84
   1   0   2   26.58    0.81
  -1   0  -2   26.25    0.81
  -1   0  -2   25.88    0.84
  -1   0  -2   26.45    0.83
  -1   0  -2   25.83    0.75
   1  -1   2  512.88   15.30
   1  -1   2  531.88   14.88
   1  -1   2  539.30   14.21
   1  -1   2  532.07   14.21
   1  -1   2  530.56   14.91
  -1   1  -2  515.04   14.20
  -1   1  -2  515.67   14.75
  -1   1  -2  531.77   14.78
  -1   1  -2  530.14   14.05
  -1   1  -2  540.82   15.26
   1  -2   2    8.56    0.39
   1  -2   2    8.86    0.39
  -1   2  -2    9.12    0.39
  -1   2  -2    9.30    0.40
  -1   2  -2    9.19    0.40
   1  -3   2  196.59    5.59
   1  -3   2  188.96    5.78
   1  -3   2  233.03    5.81
  -1   3  -2  204.00    5.99
  -1   3  -2  202.68    5.80
  -1   3  -2  199.10    5.79
  -1   3  -2  194.27    5.76
   1  -4   2   15.99    0.70
   1  -4   2   15.99    0.69
  -1   4  -2   17.94    0.65
  -1   4  -2   17.32    0.63
  -1   4  -2   17.27    0.68
   1  -5   2   19.78    0.84
   1  -5   2   19.28    0.91
  -1   5  -2   19.26    0.71
  -1   5  -2   20.23    0.76
  -1   5  -2   19.69    0.79
   1  -6   2    8.99    0.63
   1  -6   2    6.67    0.54
  -1   6  -2    7.73    0.50
  -1   6  -2    9.33    0.41
   1  -7   2  109.06    3.48
   1  -7   2  104.01    3.40
  -1   7  -2  107.09    3.32
  -1   7  -2  109.03    3.11
   1  -8   2   44.16    1.78
   1  -8   2   45.78    1.90
  -1   8  -2   47.77    1.44
  -1   8  -2   44.77    1.67
   1  -9   2  134.10    4.24
   1  -9   2  139.45    4.39
  -1   9  -2  131.45    3.73
  -1   9  -2  123.41    4.49
   1 -10   2    1.14    0.41
   1 -10   2    1.17    0.34
  -1  10  -2    0.96    0.43
   1 -11   2    0.84    0.34
  -1  11  -2   -0.29    0.31
   1 -12   2    1.05    0.40
  -1  12  -2    1.15    0.52
   1 -13   2    4.68    0.75
   0 -13  -2   -0.17    0.31
   0  12   2    0.94    0.50
   0 -12  -2    1.45    0.47
   0  11   2    0.00    0.34
   0 -11  -2   -0.04    0.29
   0  10   2    6.09    0.80
   0 -10  -2    7.23    0.50
   0 -10  -2    7.01    0.71
   0 -10  -2    6.98    0.79
   0   9   2    0.55    0.41
   0   9   2    0.01    0.22
   0  -9  -2    0.64    0.32
   0  -9  -2    0.38    0.26
   0  -9  -2    0.62    0.38
   0  -9  -2    0.21    0.17
   0   8   2  108.67    3.77
   0   8   2  112.79    3.49
   0  -8  -2  110.91    3.65
   0  -8  -2  108.80    3.54
   0  -8  -2  109.55    3.37
   0  -8  -2  106.65    3.59
   0   7   2   -0.05    0.26
   0  -7  -2    0.24    0.20
   0  -7  -2   -0.10    0.21
   0  -7  -2    0.16    0.22
   0  -7  -2   -0.24    0.14
   0   6   2    6.55    0.58
   0  -6  -2    6.96    0.56
   0  -6  -2    6.28    0.51
   0  -6  -2    6.10    0.46
   0   5   2    0.10    0.11
   0   5   2   -0.12    0.15
   0  -5  -2    0.01    0.12
   0  -5  -2    0.04    0.13
   0   4   2    7.43    0.50
   0   4   2    8.15    0.41
   0  -4  -2    7.43    0.42
   0  -4  -2    6.97    0.44
   0   3   2   -0.04    0.07
   0   3   2   -0.13    0.09
   0   3   2    0.01    0.08
   0  -3  -2    0.46    0.13
   0  -3  -2   -0.09    0.09
   0  -3  -2    0.01    0.08
   0  -3  -2   -0.14    0.09
   0   2   2  157.96    4.57
   0   2   2  162.37    4.58
   0   2   2  156.31    4.53
   0   2   2  161.04    4.41
   0  -2  -2  160.71    4.54
   0  -2  -2  155.39    4.40
   0  -2  -2  161.55    4.59
   0  -2  -2  163.62    4.57
   0   1   2    0.03    0.04
   0   1   2   -0.01    0.04
   0   1   2    0.01    0.04
   0   1   2   -0.05    0.04
   0  -1  -2   -0.06    0.04
   0  -1  -2    0.02    0.04
   0  -1  -2    0.02    0.05
   0  -1  -2    0.05    0.05
   0   0   2  405.70   10.03
   0   0   2  416.90   11.05
   0   0   2  376.24   10.75
   0   0   2  402.51   11.07
   0   0  -2  367.38   10.86
   0   0  -2  391.95   11.02
   0   0  -2  379.61   10.58
   0  -1   2   -0.01    0.01
   0  -1   2    0.05    0.04
   0  -1   2   -0.01    0.04
   0  -1   2   -0.03    0.03
   0   1  -2    0.03    0.03
   0   1  -2    0.02    0.03
   0   1  -2    0.01    0.03
   0   1  -2    0.00    0.04
   0  -2   2  156.23    4.52
   0  -2   2  158.45    4.39
   0   2  -2  164.31    4.52
   0   2  -2  161.67    4.51
   0   2  -2  157.58    4.40
   0   2  -2  161.47    4.61
   0   2  -2  161.41    4.72
   0  -3   2    0.05    0.11
   0  -3   2    0.06    0.07
   0  -3   2   -0.03    0.07
   0   3  -2    0.10    0.09
   0   3  -2   -0.14    0.06
   0   3  -2   -0.06    0.06
   0   3  -2   -0.02    0.09
   0   3  -2    0.29    0.09
   0  -4   2    6.90    0.46
   0  -4   2    7.70    0.38
   0  -4   2    7.33    0.39
   0   4  -2    7.20    0.35
   0   4  -2    7.36    0.38
   0   4  -2    6.94    0.27
   0   4  -2    7.44    0.37
   0  -5   2   -0.07    0.10
   0  -5   2   -0.08    0.15
   0   5  -2    0.16    0.09
   0   5  -2   -0.11    0.06
   0  -6   2    6.33    0.47
   0  -6   2    6.23    0.54
   0   6  -2    6.51    0.33
   0   6  -2    6.70    0.41
   0  -7   2   -0.18    0.19
   0  -7   2    0.39    0.26
   0   7  -2   -0.09    0.09
   0   7  -2   -0.13    0.14
   0  -8   2  113.74    3.63
   0  -8   2  103.57    3.43
   0   8  -2  106.95    3.08
   0   8  -2  112.05    3.33
   0   8  -2  103.04    3.72
   0  -9   2    0.82    0.32
   0  -9   2    2.36    0.65
   0   9  -2    0.20    0.37
   0 -10   2    8.28    0.70
   0 -10   2    7.27    0.85
   0  10  -2    6.31    0.82
   0 -11   2    0.28    0.29
   0  11  -2   -0.34    0.35
   0 -12   2    1.28    0.41
   0  12  -2    1.01    0.50
   0 -13   2   -0.38    0.28
   1 -13  -2    4.08    0.75
  -1  12   2    0.42    0.41
   1 -12  -2    0.71    0.41
  -1  11   2    0.81    0.44
   1 -11  -2    0.85    0.37
  -1  10   2    1.37    0.47
   1 -10  -2    1.92    0.48
   1 -10  -2    1.14    0.37
  -1   9   2  119.82    4.37
  -1   9   2  130.59    4.12
   1  -9  -2  131.69    4.25
   1  -9  -2  137.02    4.34
   1  -9  -2  127.95    4.25
  -1   8   2   45.54    1.76
  -1   8   2   45.99    2.01
   1  -8  -2   47.96    1.88
   1  -8  -2   47.40    1.53
   1  -8  -2   47.05    1.82
   1  -8  -2   41.95    1.91
  -1   7   2  125.50    3.52
  -1   7   2  105.90    3.65
   1  -7  -2  101.47    3.53
   1  -7  -2  109.82    3.27
   1  -7  -2  106.76    3.50
   1  -7  -2  107.18    3.53
  -1   6   2    8.43    0.67
   1  -6  -2    8.84    0.58
   1  -6  -2    8.80    0.41
   1  -6  -2    8.94    0.61
  -1   5   2   19.84    0.97
   1  -5  -2   18.54    0.89
   1  -5  -2   19.57    0.78
   1  -5  -2   21.39    0.90
  -1   4   2   16.88    0.81
   1  -4  -2   17.39    0.54
   1  -4  -2   17.12    0.78
   1  -4  -2   18.19    0.76
   1  -4  -2   17.16    0.68
  -1   3   2  193.46    5.59
  -1   3   2  194.85    5.65
   1  -3  -2  197.83    5.38
   1  -3  -2  197.11    5.64
   1  -3  -2  198.92    5.40
   1  -3  -2  189.41    5.65
  -1   2   2    9.64    0.44
  -1   2   2    7.81    0.41
   1  -2  -2    9.03    0.43
   1  -2  -2    9.34    0.43
   1  -2  -2    8.96    0.43
  -1   1   2  502.01   14.45
  -1   1   2  530.85   14.70
  -1   1   2  541.21   14.82
   1  -1  -2  523.18   14.63
   1  -1  -2  504.24   14.44
   1  -1  -2  541.17   14.66
  -1   0   2   26.57    0.79
  -1   0   2   26.40    0.76
  -1   0   2   27.10    0.80
  -1   0   2   27.70    0.83
  -1   0   2   26.81    0.84
   1   0  -2   27.20    0.83
   1   0  -2   26.23    0.77
   1   0  -2   26.83    0.80
   1   0  -2   27.70    0.84
  -1  -1   2  526.30   14.88
  -1  -1   2  545.58   15.31
  -1  -1   2  520.91   15.47
  -1  -1   2  525.42   14.90
   1   1  -2  524.43   13.62
   1   1  -2  538.46   15.24
   1   1  -2  545.06   14.88
   1   1  -2  527.36   14.89
   1   1  -2  558.50   15.45
  -1  -2   2    8.90    0.32
  -1  -2   2    9.06    0.41
  -1  -2   2    8.83    0.41
  -1  -2   2    8.75    0.31
  -1  -2   2    8.78    0.43
   1   2  -2    9.35    0.42
   1   2  -2    9.08    0.30
   1   2  -2    9.59    0.43
   1   2  -2    9.28    0.30
   1   2  -2    9.56    0.41
  -1  -3   2  194.72    5.54
  -1  -3   2  196.54    5.46
  -1  -3   2  190.55    5.54
  -1  -3   2  197.49    5.72
   1   3  -2  207.01    5.90
   1   3  -2  201.80    5.51
   1   3  -2  189.77    5.46
   1   3  -2  195.23    5.52
   1   3  -2  203.45    5.73
  -1  -4   2   17.05    0.76
  -1  -4   2   15.99    0.62
  -1  -4   2   17.23    0.70
   1   4  -2   16.55    0.59
   1   4  -2   16.73    0.58
   1   4  -2   16.90    0.76
  -1  -5   2   20.67    0.92
  -1  -5   2   18.96    0.76
  -1  -5   2   19.65    0.82
   1   5  -2   20.13    0.71
   1   5  -2   19.63    0.92
  -1  -6   2    9.29    0.53
  -1  -6   2    8.06    0.61
  -1  -6   2    9.36    0.51
   1   6  -2    8.29    0.41
   1   6  -2    8.42    0.39
  -1  -7   2  112.17    3.40
  -1  -7   2  108.18    3.48
  -1  -7   2  108.74    3.33
   1   7  -2  100.41    3.56
   1   7  -2  110.04    3.21
   1   7  -2  107.22    3.07
   1   7  -2  104.71    2.90
  -1  -8   2   49.25    1.96
  -1  -8   2   45.32    1.72
   1   8  -2   46.54    2.03
   1   8  -2   47.26    1.58
   1   8  -2   46.68    1.30
   1   8  -2   47.28    1.43
  -1  -9   2  135.63    4.30
  -1  -9   2  129.86    4.06
  -1  -9   2  130.14    4.05
   1   9  -2  121.36    4.36
  -1 -10   2    1.12    0.31
  -1 -10   2    0.65    0.34
   1  10  -2    0.31    0.34
  -1 -11   2    0.43    0.28
   1  11  -2   -0.10    0.39
  -1 -12   2    1.06    0.37
   1  12  -2    1.62    0.57
  -1 -13   2    3.77    0.69
   2 -13  -2    1.57    0.51
  -2  12   2    3.33    0.80
   2 -12  -2    4.15    0.79
  -2  11   2    6.92    0.89
   2 -11  -2    7.47    0.86
  -2  10   2    3.71    0.70
   2 -10  -2    3.06    0.62
   2 -10  -2    4.10    0.65
  -2   9   2   12.55    0.85
  -2   9   2   12.70    1.05
   2  -9  -2   13.91    0.97
   2  -9  -2   12.05    0.97
  -2   8   2   30.23    1.58
  -2   8   2   35.56    1.42
   2  -8  -2   30.63    1.47
   2  -8  -2   29.62    1.52
   2  -8  -2   34.00    1.47
  -2   7   2   -0.17    0.16
  -2   7   2    0.16    0.25
   2  -7  -2    0.19    0.21
   2  -7  -2   -0.06    0.20
   2  -7  -2    0.04    0.15
  -2   6   2   -0.17    0.17
   2  -6  -2    0.11    0.16
   2  -6  -2    0.01    0.14
   2  -6  -2   -0.07    0.12
   2  -6  -2   -0.01    0.05
  -2   5   2    9.83    0.65
   2  -5  -2    9.79    0.50
   2  -5  -2    9.48    0.38
   2  -5  -2    9.91    0.62
   2  -5  -2    9.83    0.35
  -2   4   2    6.31    0.48
   2  -4  -2    6.16    0.24
   2  -4  -2    7.26    0.40
   2  -4  -2    6.23    0.47
   2  -4  -2    6.63    0.30
  -2   3   2   80.84    2.54
  -2   3   2   82.98    2.57
   2  -3  -2   83.85    2.58
   2  -3  -2   82.00    2.22
   2  -3  -2   81.81    2.36
  -2   2   2    0.30    0.13
  -2   2   2    0.20    0.11
   2  -2  -2    0.11    0.06
   2  -2  -2    0.28    0.13
  -2   1   2    5.34    0.30
  -2   1   2    5.13    0.28
  -2   1   2    4.70    0.24
   2  -1  -2    4.62    0.28
   2  -1  -2    5.13    0.23
   2  -1  -2    5.00    0.28
   2  -1  -2    4.91    0.28
  -2   0   2  221.97    6.16
  -2   0   2  230.76    6.47
  -2   0   2  217.50    6.37
  -2   0   2  227.04    6.24
  -2   0   2  222.59    6.36
   2   0  -2  229.17    6.37
   2   0  -2  227.70    6.17
   2   0  -2  241.25    6.47
   2   0  -2  230.00    6.36
   2   0  -2  221.62    6.24
  -2  -1   2    4.92    0.17
  -2  -1   2    4.63    0.24
  -2  -1   2    4.80    0.20
  -2  -1   2    4.96    0.28
  -2  -1   2    4.76    0.19
  -2  -1   2    5.15    0.27
   2   1  -2    4.69    0.23
   2   1  -2    5.16    0.26
   2   1  -2    5.46    0.28
   2   1  -2    4.84    0.16
   2   1  -2    5.12    0.19
   2   1  -2    5.01    0.18
  -2  -2   2    0.24    0.10
  -2  -2   2    0.24    0.10
  -2  -2   2    0.25    0.11
   2   2  -2    0.15    0.09
   2   2  -2    0.14    0.09
   2   2  -2    0.41    0.13
  -2  -3   2   86.38    2.51
  -2  -3   2   81.36    2.59
  -2  -3   2   82.31    2.37
  -2  -3   2   83.53    2.38
   2   3  -2   87.39    2.69
   2   3  -2   84.25    2.51
  -2  -4   2    6.71    0.42
  -2  -4   2    6.08    0.44
  -2  -4   2    6.23    0.30
   2   4  -2    6.14    0.44
   2   4  -2    7.03    0.47
  -2  -5   2    9.70    0.44
  -2  -5   2    9.29    0.54
  -2  -5   2    9.12    0.59
   2   5  -2    8.73    0.59
   2   5  -2    9.77    0.35
   2   5  -2   10.33    0.63
  -2  -6   2   -0.09    0.16
  -2  -6   2   -0.12    0.12
  -2  -6   2    0.01    0.10
   2   6  -2    0.08    0.06
   2   6  -2    0.02    0.16
   2   6  -2    0.92    0.26
  -2  -7   2    0.21    0.24
  -2  -7   2   -0.08    0.15
  -2  -7   2   -0.15    0.13
   2   7  -2    0.03    0.09
   2   7  -2    0.08    0.09
   2   7  -2   -0.17    0.23
   2   7  -2   -0.18    0.11
  -2  -8   2   29.81    1.19
  -2  -8   2   31.94    1.47
  -2  -8   2   31.32    1.31
  -2  -8   2   31.11    1.23
   2   8  -2   31.20    1.10
   2   8  -2   28.33    1.49
   2   8  -2   31.18    0.95
  -2  -9   2   13.46    0.75
  -2  -9   2   14.14    0.80
  -2  -9   2   13.92    1.01
  -2  -9   2   15.13    0.87
   2   9  -2   14.71    0.67
   2   9  -2   13.52    1.05
  -2 -10   2    4.86    0.69
  -2 -10   2    3.52    0.48
   2  10  -2    4.24    0.70
  -2 -11   2    6.29    0.65
   2  11  -2    8.17    0.94
  -2 -12   2    2.46    0.57
   2  12  -2    3.21    0.84
  -2 -13   2    2.46    0.60
  -3  13   2    0.22    0.49
   3 -13  -2    0.21    0.43
  -3  12   2    1.61    0.60
   3 -12  -2    4.10    0.78
  -3  11   2    1.62    0.54
   3 -11  -2    2.60    0.67
  -3  10   2    1.06    0.43
   3 -10  -2    1.00    0.39
   3 -10  -2    1.24    0.41
  -3   9   2    0.23    0.32
  -3   9   2    0.93    0.31
   3  -9  -2    0.40    0.33
   3  -9  -2    0.55    0.33
  -3   8   2   55.74    1.99
  -3   8   2   50.63    2.16
   3  -8  -2   51.87    2.04
   3  -8  -2   49.51    2.05
   3  -8  -2   49.64    1.74
  -3   7   2   24.25    1.29
  -3   7   2   23.58    1.15
   3  -7  -2   25.68    1.25
   3  -7  -2   26.88    1.04
   3  -7  -2   26.90    1.23
  -3   6   2    3.45    0.48
  -3   6   2    2.48    0.37
   3  -6  -2    3.11    0.42
   3  -6  -2    3.12    0.33
   3  -6  -2    3.25    0.24
   3  -5  -2    6.02    0.32
   3  -5  -2    5.46    0.51
   3  -4  -2   16.83    0.56
   3  -4  -2   15.95    0.81
   3  -4  -2   16.24    0.62
  -3   3   2   65.83    2.12
  -3   3   2   61.97    1.92
  -3   3   2   65.91    2.04
   3  -3  -2   64.95    2.12
   3  -3  -2   63.79    1.92
   3  -3  -2   64.04    1.80
  -3   2   2   17.93    0.73
  -3   2   2   18.21    0.77
   3  -2  -2   17.85    0.67
   3  -2  -2   18.36    0.63
   3  -2  -2   18.61    0.77
  -3   1   2   79.15    2.31
  -3   1   2   75.77    2.23
  -3   1   2   72.34    2.20
   3  -1  -2   72.98    2.21
   3  -1  -2   73.67    2.29
   3  -1  -2   77.87    2.23
   3  -1  -2   74.14    2.22
  -3   0   2   61.62    1.87
  -3   0   2   62.68    1.86
  -3   0   2   66.13    1.95
  -3   0   2   63.74    1.92
   3   0  -2   66.54    1.95
   3   0  -2   65.55    1.91
   3   0  -2   62.10    1.86
   3   0  -2   60.25    1.87
   3   0  -2   63.67    1.90
  -3  -1   2   74.78    2.30
  -3  -1   2   74.36    2.17
  -3  -1   2   73.83    2.30
  -3  -1   2   76.95    2.21
  -3  -1   2   72.59    1.91
   3   1  -2   74.79    2.09
   3   1  -2   75.46    2.15
   3   1  -2   75.65    2.15
   3   1  -2   73.18    2.19
   3   1  -2   76.96    2.30
  -3  -2   2   17.70    0.76
  -3  -2   2   19.58    0.57
  -3  -2   2   18.49    0.76
   3   2  -2   18.71    0.72
   3   2  -2   19.28    0.74
   3   2  -2   18.73    0.75
   3   2  -2   18.38    0.68
  -3  -3   2   64.49    2.02
  -3  -3   2   65.54    2.12
   3   3  -2   68.92    2.18
   3   3  -2   63.21    2.02
   3   3  -2   64.21    2.03
  -3  -4   2   16.15    0.75
  -3  -4   2   16.23    0.53
  -3  -4   2   17.25    0.77
   3   4  -2   15.20    0.75
   3   4  -2   16.55    0.77
  -3  -5   2    5.82    0.31
  -3  -5   2    5.98    0.49
  -3  -5   2    5.91    0.44
   3   5  -2    6.25    0.51
   3   5  -2    5.98    0.50
  -3  -6   2    3.23    0.39
  -3  -6   2    3.15    0.28
  -3  -6   2    3.55    0.26
  -3  -6   2    3.63    0.43
   3   6  -2    2.30    0.39
   3   6  -2    2.58    0.39
   3   6  -2    3.59    0.26
  -3  -7   2   26.24    0.97
  -3  -7   2   25.36    1.23
  -3  -7   2   26.14    1.00
  -3  -7   2   27.28    1.18
   3   7  -2   27.03    0.90
   3   7  -2   27.11    0.92
   3   7  -2   25.13    1.26
  -3  -8   2   48.11    1.87
  -3  -8   2   50.50    1.68
  -3  -8   2   50.72    1.71
  -3  -8   2   50.28    2.00
   3   8  -2   46.11    2.01
   3   8  -2   50.42    1.66
   3   8  -2   49.37    1.52
   3   8  -2   48.88    1.48
  -3  -9   2    0.58    0.22
  -3  -9   2    0.88    0.29
  -3  -9   2    0.89    0.35
  -3  -9   2    0.48    0.20
   3   9  -2    0.43    0.31
   3   9  -2    0.81    0.23
   3   9  -2    0.71    0.14
  -3 -10   2    1.38    0.37
  -3 -10   2    1.10    0.38
  -3 -10   2    1.24    0.32
   3  10  -2    1.32    0.42
  -3 -11   2    2.23    0.46
   3  11  -2    0.93    0.46
  -3 -12   2    2.14    0.55
   3  12  -2    3.23    0.76
  -3 -13   2    0.64    0.34
  -4  13   2    7.48    1.05
   4 -13  -2    7.17    1.00
  -4  12   2   -0.37    0.39
  -4  12   2   -0.39    0.40
   4 -12  -2    0.07    0.39
  -4  11   2   20.68    1.34
  -4  11   2   18.34    1.42
   4 -11  -2   20.27    1.35
  -4  10   2   -0.14    0.28
  -4  10   2   -0.04    0.28
   4 -10  -2   -0.05    0.29
   4 -10  -2    0.29    0.35
  -4   9   2    0.31    0.33
  -4   9   2    0.26    0.32
  -4   9   2    0.49    0.24
   4  -9  -2    0.92    0.25
   4  -9  -2    0.59    0.35
  -4   8   2    1.29    0.34
  -4   8   2    2.69    0.50
  -4   8   2    2.19    0.56
   4  -8  -2    2.12    0.49
   4  -8  -2    2.63    0.37
   4  -8  -2    2.99    0.52
  -4   7   2    9.02    0.78
  -4   7   2   11.69    0.75
  -4   7   2   10.30    0.76
   4  -7  -2    9.20    0.58
   4  -7  -2    9.58    0.48
   4  -7  -2    8.75    0.75
  -4   6   2    0.86    0.25
  -4   6   2    1.15    0.30
   4  -6  -2    1.12    0.21
   4  -6  -2    0.97    0.29
  -4   5   2   76.14    2.41
  -4   5   2   58.52    2.35
  -4   5   2   73.45    2.18
   4  -5  -2   73.19    2.48
   4  -5  -2   74.34    2.18
  -4   4   2   31.61    1.22
  -4   4   2   30.86    1.08
   4  -4  -2   31.36    0.99
   4  -4  -2   30.01    1.26
   4  -4  -2   31.70    1.08
  -4   3   2   52.35    1.64
  -4   3   2   52.82    1.81
  -4   3   2   53.11    1.73
   4  -3  -2   51.27    1.52
   4  -3  -2   51.15    1.63
   4  -3  -2   49.94    1.78
  -4   2   2   16.84    0.71
  -4   2   2   16.77    0.67
  -4   2   2   17.09    0.61
  -4   2   2   18.34    0.78
   4  -2  -2   16.91    0.76
   4  -2  -2   17.27    0.63
   4  -2  -2   18.00    0.69
   4  -2  -2   16.94    0.73
  -4   1   2   13.42    0.53
  -4   1   2   13.20    0.60
  -4   1   2   12.84    0.56
  -4   1   2   12.94    0.56
   4  -1  -2   14.16    0.57
   4  -1  -2   12.91    0.60
   4  -1  -2   12.55    0.56
   4  -1  -2   13.20    0.53
  -4   0   2    3.00    0.25
  -4   0   2    3.41    0.26
  -4   0   2    3.28    0.24
  -4   0   2    3.15    0.25
  -4   0   2    3.18    0.21
  -4   0   2    3.23    0.14
   4   0  -2    2.79    0.26
   4   0  -2    3.23    0.25
   4   0  -2    2.78    0.23
   4   0  -2    3.46    0.25
   4   0  -2    3.26    0.25
  -4  -1   2   11.10    0.48
  -4  -1   2   13.42    0.56
  -4  -1   2   12.76    0.43
  -4  -1   2   13.09    0.59
  -4  -1   2   13.30    0.56
   4   1  -2   13.67    0.56
   4   1  -2   13.81    0.55
   4   1  -2   13.47    0.55
   4   1  -2   12.70    0.42
   4   1  -2   13.36    0.49
   4   1  -2   13.62    0.54
  -4  -2   2   16.30    0.73
  -4  -2   2   17.22    0.75
  -4  -2   2   17.92    0.57
   4   2  -2   17.33    0.52
   4   2  -2   17.13    0.68
   4   2  -2   16.94    0.69
   4   2  -2   17.27    0.62
   4   2  -2   17.71    0.72
   4   2  -2   17.25    0.52
  -4  -3   2   50.44    1.44
  -4  -3   2   49.94    1.45
  -4  -3   2   53.81    1.78
   4   3  -2   49.32    1.66
   4   3  -2   54.09    1.79
   4   3  -2   49.41    1.63
  -4  -4   2   30.87    0.89
  -4  -4   2   30.57    0.90
  -4  -4   2   27.90    1.19
  -4  -4   2   32.61    1.20
   4   4  -2   30.00    1.19
   4   4  -2   30.41    1.17
   4   4  -2   31.53    1.04
  -4  -5   2   72.43    2.46
  -4  -5   2   73.18    2.11
  -4  -5   2   73.13    2.37
  -4  -5   2   74.53    2.10
   4   5  -2   71.96    2.13
   4   5  -2   75.03    2.42
   4   5  -2   73.84    2.41
   4   5  -2   66.75    2.19
  -4  -6   2    1.08    0.19
  -4  -6   2    1.29    0.33
  -4  -6   2    0.97    0.17
  -4  -6   2    0.59    0.21
   4   6  -2    1.00    0.28
   4   6  -2    0.93    0.26
   4   6  -2    0.92    0.20
   4   6  -2    0.89    0.20
  -4  -7   2    9.70    0.69
  -4  -7   2   10.12    0.48
  -4  -7   2    9.87    0.75
  -4  -7   2    9.47    0.49
   4   7  -2   10.84    0.49
   4   7  -2    9.59    0.48
   4   7  -2   10.61    0.76
   4   7  -2    8.07    0.72
  -4  -8   2    2.35    0.49
  -4  -8   2    2.70    0.31
  -4  -8   2    2.91    0.34
  -4  -8   2    2.33    0.46
   4   8  -2    2.58    0.28
   4   8  -2    2.47    0.25
   4   8  -2    2.14    0.48
  -4  -9   2    1.16    0.28
  -4  -9   2    0.91    0.39
  -4  -9   2    0.78    0.29
  -4  -9   2    1.11    0.30
   4   9  -2    1.03    0.18
   4   9  -2    0.58    0.31
   4   9  -2    0.97    0.24
  -4 -10   2    0.13    0.28
  -4 -10   2    0.22    0.25
  -4 -10   2    0.25    0.19
   4  10  -2   -0.12    0.24
  -4 -11   2   20.82    1.21
  -4 -11   2   20.00    1.00
   4  11  -2   20.81    1.39
  -4 -12   2    0.07    0.25
   4  12  -2   -0.35    0.36
  -4 -13   2    9.38    0.78
  -5  13   2    5.25    1.00
   5 -13  -2    8.26    1.08
  -5  12   2    7.53    1.01
  -5  12   2    5.01    1.00
   5 -12  -2    7.21    0.99
  -5  11   2    2.67    0.72
  -5  11   2    3.06    0.81
   5 -11  -2    3.73    0.78
  -5  10   2    0.75    0.41
  -5  10   2    1.52    0.43
   5 -10  -2    1.25    0.42
  -5   9   2   10.62    0.84
  -5   9   2   11.91    1.04
  -5   9   2   11.38    0.88
   5  -9  -2   11.30    0.68
   5  -9  -2   10.20    0.89
  -5   8   2    7.36    0.70
  -5   8   2    8.49    0.72
  -5   8   2    5.15    0.71
   5  -8  -2    7.24    0.54
   5  -8  -2    6.63    0.45
   5  -8  -2    5.84    0.73
  -5   7   2   53.85    2.14
  -5   7   2   56.83    2.14
   5  -7  -2   58.29    1.95
   5  -7  -2   61.20    1.89
   5  -7  -2   57.09    2.26
  -5   6   2    0.58    0.23
  -5   6   2    1.11    0.24
  -5   6   2    0.41    0.22
   5  -6  -2    0.80    0.22
   5  -6  -2    0.59    0.26
  -5   5   2   59.21    1.88
  -5   5   2   63.26    2.14
  -5   5   2   57.31    2.04
   5  -5  -2   55.00    2.12
   5  -5  -2   57.83    1.88
  -5   4   2   90.98    2.76
  -5   4   2   90.12    2.85
  -5   4   2   94.27    2.98
   5  -4  -2   89.65    2.99
   5  -4  -2   91.04    2.76
   5  -4  -2   90.32    2.58
  -5   3   2    4.59    0.39
  -5   3   2    4.63    0.34
  -5   3   2    4.93    0.26
  -5   3   2    5.33    0.45
   5  -3  -2    5.05    0.32
   5  -3  -2    4.41    0.40
   5  -3  -2    5.53    0.45
   5  -3  -2    5.02    0.35
  -5   2   2    2.17    0.29
  -5   2   2    2.25    0.24
  -5   2   2    2.70    0.28
  -5   2   2    2.98    0.22
   5  -2  -2    2.59    0.31
   5  -2  -2    3.13    0.27
   5  -2  -2    2.58    0.24
   5  -2  -2    2.31    0.28
  -5   1   2  327.76    8.56
  -5   1   2  301.92    8.42
  -5   1   2  307.07    8.74
  -5   1   2  298.03    8.57
  -5   1   2  303.19    8.75
   5  -1  -2  300.57    8.72
   5  -1  -2  306.39    8.58
   5  -1  -2  300.16    8.44
   5  -1  -2  306.50    8.13
  -5   0   2   94.81    2.91
  -5   0   2   96.65    2.93
  -5   0   2  102.06    2.91
  -5   0   2   96.99    2.86
  -5   0   2   96.44    2.70
  -5   0   2   97.59    2.98
  -5   0   2   99.22    2.94
   5   0  -2  100.29    2.78
   5   0  -2   92.88    2.88
   5   0  -2   94.74    2.91
   5   0  -2   94.83    2.85
   5   0  -2  101.78    2.93
  -5  -1   2  305.27    8.88
  -5  -1   2  297.58    8.32
  -5  -1   2  318.64    8.52
   5   1  -2  294.10    8.48
   5   1  -2  301.61    8.37
   5   1  -2  298.67    8.37
   5   1  -2  304.30    8.56
   5   1  -2  306.26    8.86
   5   1  -2  310.54    8.13
   5   1  -2  309.91    8.55
  -5  -2   2    2.73    0.19
  -5  -2   2    2.77    0.19
  -5  -2   2    2.25    0.20
  -5  -2   2    2.72    0.29
   5   2  -2    2.81    0.26
   5   2  -2    2.35    0.15
   5   2  -2    2.50    0.26
   5   2  -2    2.40    0.16
   5   2  -2    2.12    0.19
   5   2  -2    2.71    0.25
   5   2  -2    2.60    0.25
  -5  -3   2    4.72    0.22
  -5  -3   2    4.82    0.22
  -5  -3   2    4.66    0.40
   5   3  -2    5.27    0.40
   5   3  -2    5.05    0.35
   5   3  -2    4.02    0.36
   5   3  -2    4.70    0.34
   5   3  -2    4.73    0.39
   5   3  -2    5.00    0.33
  -5  -4   2   89.18    2.94
  -5  -4   2   90.01    2.55
  -5  -4   2   89.57    2.54
   5   4  -2   89.18    2.80
   5   4  -2   90.92    2.62
   5   4  -2   90.26    2.78
   5   4  -2   90.91    2.73
  -5  -5   2   55.82    1.64
  -5  -5   2   53.36    2.01
  -5  -5   2   59.08    1.97
  -5  -5   2   56.60    1.62
   5   5  -2   57.67    1.76
   5   5  -2   58.31    1.81
   5   5  -2   52.16    1.92
   5   5  -2   55.47    1.98
  -5  -6   2    0.61    0.26
  -5  -6   2    0.67    0.15
  -5  -6   2    0.81    0.25
  -5  -6   2    0.67    0.14
   5   6  -2    0.76    0.25
   5   6  -2    1.03    0.21
   5   6  -2    0.56    0.16
   5   6  -2    0.69    0.24
  -5  -7   2   60.88    1.81
  -5  -7   2   57.39    1.82
  -5  -7   2   61.97    2.20
  -5  -7   2   56.93    2.19
   5   7  -2   58.47    2.21
   5   7  -2   60.68    2.24
   5   7  -2   59.90    1.88
   5   7  -2   57.96    1.83
  -5  -8   2    6.92    0.40
  -5  -8   2    6.58    0.62
  -5  -8   2    7.10    0.44
  -5  -8   2    7.29    0.70
   5   8  -2    6.66    0.44
   5   8  -2    7.88    0.74
   5   8  -2    6.64    0.67
   5   8  -2    7.27    0.42
  -5  -9   2   11.36    0.61
  -5  -9   2   11.47    0.85
  -5  -9   2   11.83    0.58
  -5  -9   2   10.93    0.88
   5   9  -2   11.69    0.53
   5   9  -2   12.60    0.94
  -5 -10   2    0.74    0.35
  -5 -10   2    0.87    0.23
  -5 -10   2    0.81    0.34
   5  10  -2    0.84    0.37
  -5 -11   2    2.47    0.43
  -5 -11   2    1.34    0.41
   5  11  -2    3.43    0.77
  -5 -12   2    6.47    0.63
  -5 -12   2    6.03    0.81
   5  12  -2    6.38    0.98
  -5 -13   2    5.32    0.62
  -6  13   2    8.11    1.05
   6 -13  -2    7.17    1.09
  -6  12   2    7.09    0.98
   6 -12  -2   12.33    1.22
  -6  11   2   20.27    1.35
  -6  11   2   19.10    1.49
   6 -11  -2   20.38    1.44
  -6  10   2    0.64    0.39
  -6  10   2    0.36    0.37
   6 -10  -2    0.31    0.38
   6 -10  -2    0.87    0.27
  -6   9   2    0.26    0.29
  -6   9   2    0.02    0.28
  -6   9   2    0.12    0.31
   6  -9  -2    0.04    0.33
   6  -9  -2    0.22    0.21
  -6   8   2   -0.01    0.23
  -6   8   2    0.24    0.28
  -6   8   2   -0.30    0.25
   6  -8  -2    0.22    0.20
   6  -8  -2   -0.05    0.13
   6  -8  -2    0.22    0.33
  -6   7   2    2.44    0.49
  -6   7   2    2.97    0.54
   6  -7  -2    2.59    0.51
   6  -7  -2    3.23    0.37
  -6   6   2    6.30    0.45
  -6   6   2    4.91    0.53
  -6   6   2    7.47    0.64
   6  -6  -2    5.77    0.44
   6  -6  -2    5.32    0.59
  -6   5   2   91.84    2.74
  -6   5   2   85.08    2.83
  -6   5   2   89.42    2.97
   6  -5  -2   83.92    2.97
   6  -5  -2   86.28    2.72
  -6   4   2   55.99    1.88
  -6   4   2   51.78    2.01
  -6   4   2   58.44    1.71
  -6   4   2   57.19    1.96
   6  -4  -2   56.75    2.07
   6  -4  -2   59.27    1.89
   6  -4  -2   55.65    1.74
  -6   3   2  181.20    5.32
  -6   3   2  185.48    5.31
  -6   3   2  181.19    5.30
   6  -3  -2  184.91    5.54
   6  -3  -2  182.94    5.03
   6  -3  -2  185.95    5.33
  -6   2   2    7.19    0.51
  -6   2   2    8.00    0.40
  -6   2   2    6.49    0.46
  -6   2   2    5.06    0.44
  -6   2   2    7.09    0.44
   6  -2  -2    6.83    0.48
   6  -2  -2    7.26    0.46
   6  -2  -2    7.21    0.49
   6  -2  -2    7.07    0.41
  -6   1   2   34.50    1.24
  -6   1   2   35.81    1.26
  -6   1   2   34.84    1.26
  -6   1   2   35.75    1.31
   6  -1  -2   33.55    1.18
   6  -1  -2   34.69    1.29
   6  -1  -2   35.74    1.27
   6  -1  -2   34.60    1.25
  -6   0   2    0.94    0.16
  -6   0   2    0.89    0.11
  -6   0   2    0.71    0.19
  -6   0   2    0.81    0.22
  -6   0   2    0.47    0.15
  -6   0   2    1.25    0.24
  -6   0   2    0.97    0.23
   6   0  -2    1.19    0.22
   6   0  -2    1.00    0.22
   6   0  -2    0.86    0.21
   6   0  -2    1.12    0.21
   6   0  -2    0.75    0.20
  -6  -1   2   29.09    1.12
  -6  -1   2   32.73    1.19
  -6  -1   2   34.68    1.03
  -6  -1   2   34.52    1.23
   6   1  -2   32.87    1.18
   6   1  -2   36.69    1.19
   6   1  -2   34.85    1.14
   6   1  -2   32.92    1.19
   6   1  -2   33.18    1.16
   6   1  -2   33.97    1.01
   6   1  -2   33.43    1.21
  -6  -2   2    7.23    0.47
  -6  -2   2    7.15    0.36
  -6  -2   2    7.19    0.36
  -6  -2   2    7.99    0.38
   6   2  -2    7.35    0.33
   6   2  -2    8.03    0.45
   6   2  -2    7.19    0.34
   6   2  -2    7.37    0.45
   6   2  -2    6.70    0.43
   6   2  -2    6.41    0.43
  -6  -3   2  184.79    5.19
  -6  -3   2  175.78    5.55
  -6  -3   2  186.44    5.25
  -6  -3   2  180.48    5.19
   6   3  -2  181.00    5.34
   6   3  -2  178.99    5.20
   6   3  -2  186.81    5.08
   6   3  -2  179.42    5.21
   6   3  -2  193.79    5.33
   6   3  -2  186.44    5.61
  -6  -4   2   57.22    2.08
  -6  -4   2   57.28    1.69
  -6  -4   2   58.94    1.68
   6   4  -2   56.42    1.88
   6   4  -2   56.07    1.98
   6   4  -2   59.75    1.90
   6   4  -2   56.04    1.82
   6   4  -2   56.90    1.96
  -6  -5   2   85.56    2.48
  -6  -5   2   85.41    2.93
  -6  -5   2   86.59    2.46
   6   5  -2   87.17    2.58
   6   5  -2   88.45    2.68
   6   5  -2   83.70    2.80
   6   5  -2   87.39    2.77
  -6  -6   2    5.92    0.29
  -6  -6   2    5.77    0.55
  -6  -6   2    5.43    0.54
  -6  -6   2    5.80    0.26
   6   6  -2    6.31    0.53
   6   6  -2    5.84    0.43
   6   6  -2    5.69    0.40
   6   6  -2    5.55    0.55
  -6  -7   2    2.72    0.46
  -6  -7   2    2.92    0.22
  -6  -7   2    2.46    0.50
  -6  -7   2    2.52    0.24
   6   7  -2    2.80    0.34
   6   7  -2    3.09    0.45
   6   7  -2    2.64    0.31
   6   7  -2    3.28    0.55
  -6  -8   2    0.26    0.12
  -6  -8   2    0.29    0.13
  -6  -8   2   -0.07    0.24
  -6  -8   2    0.16    0.23
   6   8  -2    0.06    0.27
   6   8  -2    0.27    0.17
   6   8  -2    0.18    0.13
   6   8  -2    0.14    0.25
  -6  -9   2   -0.06    0.12
  -6  -9   2   -0.01    0.25
  -6  -9   2   -0.09    0.14
  -6  -9   2    0.41    0.30
   6   9  -2   -0.21    0.21
  -6 -10   2    0.25    0.29
  -6 -10   2    0.50    0.17
  -6 -10   2    0.55    0.18
   6  10  -2    0.76    0.36
  -6 -11   2   17.91    1.23
  -6 -11   2   18.31    0.85
   6  11  -2   18.12    1.33
  -6 -12   2    8.11    0.62
  -6 -12   2    9.19    0.97
   6  12  -2    9.56    1.11
  -6 -13   2    7.12    0.60
  -7  13   2    1.09    0.48
   7 -13  -2    1.26    0.61
  -7  12   2   24.63    1.56
   7 -12  -2   27.05    1.76
  -7  11   2    1.31    0.56
  -7  11   2    1.19    0.45
   7 -11  -2    1.15    0.48
  -7  10   2   11.20    1.09
  -7  10   2   10.67    0.96
   7 -10  -2   10.68    1.06
   7 -10  -2   10.33    0.71
  -7   9   2   31.88    1.60
  -7   9   2   35.22    1.68
  -7   9   2   34.46    1.82
   7  -9  -2   32.90    1.36
   7  -9  -2   33.85    1.38
   7  -9  -2   33.03    1.74
  -7   8   2    0.65    0.34
  -7   8   2    0.69    0.32
   7  -8  -2    0.57    0.20
   7  -8  -2    0.29    0.32
  -7   7   2   69.86    2.49
  -7   7   2   67.99    2.28
  -7   7   2   63.19    2.54
   7  -7  -2   72.42    2.30
   7  -7  -2   69.03    2.65
  -7   6   2   15.95    0.80
  -7   6   2   14.74    0.90
  -7   6   2   19.97    1.04
   7  -6  -2   15.43    0.99
   7  -6  -2   16.22    0.81
  -7   5   2    0.35    0.17
  -7   5   2    0.44    0.24
  -7   5   2    0.00    0.24
   7  -5  -2    0.32    0.26
   7  -5  -2    0.20    0.16
  -7   4   2  195.86    5.52
  -7   4   2  196.38    5.61
  -7   4   2  188.15    5.59
   7  -4  -2  183.56    5.26
   7  -4  -2  190.39    5.85
   7  -4  -2  196.46    5.61
   7  -4  -2  188.39    5.67
  -7   3   2   21.89    0.85
  -7   3   2   22.21    1.05
  -7   3   2   23.48    0.99
  -7   3   2   22.79    1.00
   7  -3  -2   22.21    0.89
   7  -3  -2   23.54    0.99
   7  -3  -2   22.56    1.07
   7  -3  -2   23.23    1.04
  -7   2   2   30.93    1.16
  -7   2   2   38.17    1.36
  -7   2   2   31.52    1.23
  -7   2   2   32.62    1.25
  -7   2   2   33.77    1.35
   7  -2  -2   31.00    1.30
   7  -2  -2   33.80    1.29
   7  -2  -2   32.14    1.24
   7  -2  -2   31.16    1.16
  -7   1   2   63.60    1.92
  -7   1   2   61.61    2.10
  -7   1   2   62.94    2.08
  -7   1   2   60.30    2.00
  -7   1   2   58.14    2.02
   7  -1  -2   60.85    2.02
   7  -1  -2   59.87    1.92
   7  -1  -2   62.62    2.08
   7  -1  -2   63.75    2.05
  -7   0   2    0.93    0.23
  -7   0   2    1.52    0.14
  -7   0   2    1.87    0.27
  -7   0   2    1.47    0.26
  -7   0   2    1.38    0.19
  -7   0   2    1.59    0.25
   7   0  -2    1.39    0.24
   7   0  -2    1.00    0.21
   7   0  -2    1.63    0.25
   7   0  -2    1.16    0.25
   7   0  -2    1.21    0.24
  -7  -1   2   60.04    1.97
  -7  -1   2   60.90    1.80
  -7  -1   2   61.53    2.02
  -7  -1   2   61.71    1.99
   7   1  -2   63.33    2.05
   7   1  -2   62.50    1.95
   7   1  -2   63.42    2.00
   7   1  -2   62.06    1.99
   7   1  -2   62.47    1.95
   7   1  -2   60.11    1.79
   7   1  -2   59.41    2.00
  -7  -2   2   32.06    1.11
  -7  -2   2   32.26    1.11
  -7  -2   2   30.78    1.06
   7   2  -2   33.47    1.07
   7   2  -2   31.26    1.02
   7   2  -2   32.00    1.17
   7   2  -2   31.28    1.19
   7   2  -2   32.55    1.21
   7   2  -2   30.44    1.20
  -7  -3   2   22.79    0.90
  -7  -3   2   22.81    0.82
  -7  -3   2   22.57    0.82
   7   3  -2   22.52    0.93
   7   3  -2   22.76    1.00
   7   3  -2   22.52    0.85
   7   3  -2   22.81    0.73
   7   3  -2   24.32    0.97
   7   3  -2   21.07    0.97
  -7  -4   2  187.98    5.42
  -7  -4   2  188.67    5.42
  -7  -4   2  184.02    5.86
   7   4  -2  199.50    5.52
   7   4  -2  195.51    5.54
   7   4  -2  204.87    5.61
   7   4  -2  187.17    5.32
   7   4  -2  183.87    5.64
  -7  -5   2    0.31    0.22
  -7  -5   2    0.33    0.10
  -7  -5   2    0.36    0.09
   7   5  -2   -0.02    0.14
   7   5  -2    0.01    0.16
   7   5  -2    0.08    0.12
   7   5  -2    0.32    0.21
   7   5  -2    0.02    0.17
  -7  -6   2   15.00    0.55
  -7  -6   2   14.66    0.52
  -7  -6   2   15.26    0.92
   7   6  -2   15.16    0.84
   7   6  -2   15.76    0.76
   7   6  -2   15.61    0.74
   7   6  -2   14.33    0.90
  -7  -7   2   67.06    2.56
  -7  -7   2   69.66    2.01
  -7  -7   2   65.96    2.03
   7   7  -2   68.07    2.52
   7   7  -2   69.14    2.22
   7   7  -2   67.94    2.44
   7   7  -2   70.57    2.19
  -7  -8   2    0.58    0.29
  -7  -8   2    0.64    0.17
  -7  -8   2    0.76    0.30
  -7  -8   2    0.70    0.20
   7   8  -2    0.53    0.30
   7   8  -2    0.37    0.20
   7   8  -2   -0.03    0.25
   7   8  -2    0.47    0.17
  -7  -9   2   35.25    1.68
  -7  -9   2   35.23    1.67
  -7  -9   2   33.13    1.15
  -7  -9   2   33.59    1.11
   7   9  -2   33.01    1.62
  -7 -10   2   11.35    0.56
  -7 -10   2   11.50    0.97
  -7 -10   2   11.20    0.53
   7  10  -2   10.24    0.92
  -7 -11   2    2.16    0.34
  -7 -11   2    1.09    0.43
   7  11  -2    1.15    0.45
  -7 -12   2   27.72    1.08
  -7 -12   2   27.59    1.61
   7  12  -2   25.31    1.64
  -7 -13   2    0.58    0.22
  -8  13   2   -0.25    0.38
   8 -13  -2   -0.10    0.49
  -8  12   2    9.91    1.08
   8 -12  -2   10.19    1.16
  -8  11   2    1.47    0.58
  -8  11   2    0.98    0.47
   8 -11  -2    1.42    0.54
  -8  10   2    0.33    0.37
  -8  10   2    0.58    0.38
   8 -10  -2    0.30    0.26
   8 -10  -2    0.43    0.43
  -8   9   2   -0.09    0.28
  -8   9   2   -0.30    0.28
  -8   9   2    0.11    0.29
   8  -9  -2    0.33    0.41
   8  -9  -2    0.02    0.21
  -8   8   2   12.13    0.95
  -8   8   2   14.54    1.05
   8  -8  -2   14.69    0.81
   8  -8  -2   13.17    1.06
  -8   7   2    0.53    0.21
  -8   7   2    0.63    0.31
  -8   7   2    0.09    0.27
   8  -7  -2    0.23    0.19
   8  -7  -2    0.41    0.32
  -8   6   2   10.65    0.67
  -8   6   2   11.02    0.85
  -8   6   2   10.38    0.75
   8  -6  -2   10.73    0.67
   8  -6  -2   10.66    0.84
  -8   5   2   -0.11    0.18
  -8   5   2   -0.01    0.08
  -8   5   2   -0.04    0.13
  -8   5   2   -0.03    0.21
   8  -5  -2    0.07    0.13
   8  -5  -2    0.14    0.24
  -8   4   2   12.67    0.74
  -8   4   2   15.93    0.89
  -8   4   2   13.96    0.60
  -8   4   2   12.89    0.78
   8  -4  -2   12.46    0.67
   8  -4  -2   12.56    0.88
   8  -4  -2   14.68    0.87
   8  -4  -2   13.91    0.74
  -8   3   2    1.43    0.27
  -8   3   2    0.90    0.28
  -8   3   2    1.35    0.36
  -8   3   2    2.54    0.37
   8  -3  -2    1.72    0.34
   8  -3  -2    1.71    0.39
   8  -3  -2    1.82    0.37
   8  -3  -2    1.74    0.35
  -8   2   2   39.73    1.63
  -8   2   2   46.85    1.74
  -8   2   2   43.50    1.60
  -8   2   2   44.52    1.62
   8  -2  -2   43.80    1.64
   8  -2  -2   46.59    1.71
   8  -2  -2   47.76    1.65
   8  -2  -2   43.74    1.52
  -8   1   2    0.94    0.16
  -8   1   2    0.80    0.22
  -8   1   2    0.57    0.18
  -8   1   2    0.69    0.19
  -8   1   2    0.53    0.18
   8  -1  -2    0.42    0.18
   8  -1  -2    0.48    0.18
   8  -1  -2    0.31    0.18
   8  -1  -2    0.64    0.18
  -8   0   2   57.97    1.99
  -8   0   2   57.34    1.75
  -8   0   2   58.15    2.02
  -8   0   2   61.49    2.04
  -8   0   2   59.75    1.92
   8   0  -2   59.54    1.99
   8   0  -2   63.18    2.04
   8   0  -2   57.59    1.97
   8   0  -2   58.49    2.00
   8   0  -2   58.49    1.92
  -8  -1   2    0.67    0.14
  -8  -1   2    0.98    0.24
  -8  -1   2    1.25    0.22
  -8  -1   2    0.69    0.19
  -8  -1   2    0.57    0.17
   8   1  -2    0.46    0.18
   8   1  -2    0.50    0.15
   8   1  -2    0.58    0.19
   8   1  -2    0.68    0.18
   8   1  -2    0.57    0.18
   8   1  -2    0.93    0.19
  -8  -2   2   46.42    1.53
  -8  -2   2   45.32    1.54
  -8  -2   2   44.91    1.45
   8   2  -2   46.69    1.65
   8   2  -2   49.63    1.64
   8   2  -2   44.05    1.40
   8   2  -2   45.12    1.64
   8   2  -2   43.44    1.47
   8   2  -2   43.90    1.56
  -8  -3   2    2.03    0.29
  -8  -3   2    2.01    0.27
  -8  -3   2    1.62    0.25
   8   3  -2    1.91    0.35
   8   3  -2    2.26    0.26
   8   3  -2    1.45    0.32
   8   3  -2    2.02    0.20
   8   3  -2    1.81    0.33
   8   3  -2    1.81    0.31
  -8  -4   2   13.71    0.58
  -8  -4   2   14.61    0.73
  -8  -4   2   13.90    0.57
  -8  -4   2   12.70    0.85
   8   4  -2   13.84    0.73
   8   4  -2   13.40    0.71
   8   4  -2   13.91    0.78
   8   4  -2   12.36    0.77
   8   4  -2   13.96    0.67
  -8  -5   2    0.15    0.22
  -8  -5   2    0.06    0.09
  -8  -5   2   -0.08    0.09
   8   5  -2   -0.13    0.15
   8   5  -2    0.06    0.17
   8   5  -2   -0.10    0.13
   8   5  -2   -0.14    0.11
   8   5  -2    0.07    0.19
  -8  -6   2   10.27    0.44
  -8  -6   2   10.95    0.43
  -8  -6   2   11.42    0.82
   8   6  -2    9.90    0.63
   8   6  -2    9.80    0.78
   8   6  -2   10.20    0.67
   8   6  -2   11.23    0.80
   8   6  -2   11.18    0.64
  -8  -7   2    0.14    0.29
  -8  -7   2    0.61    0.15
  -8  -7   2    0.30    0.10
   8   7  -2    0.37    0.23
   8   7  -2    0.44    0.22
   8   7  -2    0.58    0.31
   8   7  -2    0.24    0.16
  -8  -8   2   13.82    0.54
  -8  -8   2   13.01    0.97
  -8  -8   2   13.93    0.51
   8   8  -2   13.19    0.75
   8   8  -2   13.89    0.93
   8   8  -2   13.96    1.00
   8   8  -2   13.70    0.72
  -8  -9   2   -0.19    0.28
  -8  -9   2   -0.08    0.09
  -8  -9   2   -0.15    0.10
   8   9  -2   -0.18    0.24
  -8 -10   2    0.21    0.13
  -8 -10   2    0.25    0.11
  -8 -10   2    0.37    0.34
   8  10  -2    0.67    0.35
  -8 -11   2    1.24    0.25
  -8 -11   2    0.84    0.44
   8  11  -2    0.03    0.38
  -8 -12   2   10.07    0.50
  -8 -12   2   10.02    1.09
   8  12  -2    9.77    1.12
  -9  12   2    3.85    0.87
   9 -12  -2    5.10    1.05
  -9  11   2   -0.15    0.42
  -9  11   2    0.31    0.40
   9 -11  -2    0.14    0.42
  -9  10   2    4.02    0.85
  -9  10   2    4.01    0.73
   9 -10  -2    4.67    0.81
  -9   9   2    7.74    0.83
  -9   9   2    7.87    0.85
   9  -9  -2    5.79    0.89
  -9   8   2    2.96    0.65
  -9   8   2    2.25    0.52
   9  -8  -2    2.96    0.44
   9  -8  -2    1.67    0.50
  -9   7   2    4.75    0.50
  -9   7   2    4.61    0.64
  -9   7   2    3.98    0.62
   9  -7  -2    4.10    0.48
   9  -7  -2    2.84    0.63
  -9   6   2   24.82    1.16
  -9   6   2   28.03    1.38
  -9   6   2   23.46    1.22
   9  -6  -2   25.48    1.38
   9  -6  -2   26.75    1.19
  -9   5   2    1.09    0.21
  -9   5   2    0.81    0.32
  -9   5   2    1.61    0.37
  -9   5   2    0.84    0.31
   9  -5  -2    0.60    0.30
   9  -5  -2    1.26    0.34
  -9   4   2   20.82    1.01
  -9   4   2   21.70    0.87
  -9   4   2   21.35    1.05
  -9   4   2   22.91    1.16
   9  -4  -2   20.59    0.94
   9  -4  -2   22.38    1.16
   9  -4  -2   22.27    1.03
  -9   3   2    7.70    0.58
  -9   3   2    7.41    0.63
  -9   3   2    7.61    0.50
  -9   3   2    6.27    0.58
   9  -3  -2    8.08    0.62
   9  -3  -2    7.75    0.65
   9  -3  -2    8.02    0.54
   9  -3  -2    7.94    0.58
  -9   2   2   57.90    1.81
  -9   2   2   59.32    2.05
  -9   2   2   54.85    2.08
  -9   2   2   56.11    1.99
  -9   2   2   59.35    2.15
   9  -2  -2   57.47    2.05
   9  -2  -2   57.04    1.92
   9  -2  -2   57.55    2.09
   9  -2  -2   58.18    2.04
  -9   1   2   13.81    0.59
  -9   1   2   14.03    0.77
  -9   1   2   15.15    0.82
  -9   1   2   14.55    0.77
  -9   1   2   14.87    0.79
   9  -1  -2   14.79    0.78
   9  -1  -2   13.38    0.76
   9  -1  -2   15.64    0.81
   9  -1  -2   13.35    0.72
  -9   0   2    7.39    0.54
  -9   0   2    6.39    0.51
  -9   0   2    6.63    0.41
  -9   0   2    6.98    0.34
  -9   0   2    6.46    0.50
   9   0  -2    6.35    0.51
   9   0  -2    6.96    0.51
   9   0  -2    7.06    0.53
   9   0  -2    6.25    0.48
   9   0  -2    7.35    0.52
  -9  -1   2   13.94    0.78
  -9  -1   2   15.24    0.75
  -9  -1   2   14.10    0.57
  -9  -1   2   13.74    0.72
   9   1  -2   15.25    0.67
   9   1  -2   14.60    0.77
   9   1  -2   14.55    0.79
   9   1  -2   15.24    0.78
   9   1  -2   14.96    0.70
   9   1  -2   15.78    0.80
  -9  -2   2   59.62    1.83
  -9  -2   2   56.65    1.93
  -9  -2   2   59.06    1.55
   9   2  -2   63.76    2.09
   9   2  -2   59.15    2.01
   9   2  -2   58.19    1.78
   9   2  -2   56.48    1.95
   9   2  -2   55.11    2.02
   9   2  -2   59.37    1.89
  -9  -3   2    8.80    0.50
  -9  -3   2    8.15    0.49
  -9  -3   2    8.25    0.48
   9   3  -2    7.43    0.56
   9   3  -2    7.62    0.43
   9   3  -2    7.59    0.40
   9   3  -2    8.33    0.63
   9   3  -2    8.58    0.59
  -9  -4   2   23.78    0.98
  -9  -4   2   21.91    0.86
  -9  -4   2   22.11    0.85
   9   4  -2   22.49    1.03
   9   4  -2   21.54    1.07
   9   4  -2   21.14    0.99
   9   4  -2   22.56    0.91
   9   4  -2   21.55    1.05
  -9  -5   2    1.13    0.23
  -9  -5   2    0.67    0.28
  -9  -5   2    1.09    0.22
   9   5  -2    1.80    0.31
   9   5  -2    1.43    0.36
   9   5  -2    1.41    0.35
   9   5  -2    1.49    0.40
   9   5  -2    1.67    0.33
  -9  -6   2   23.29    1.28
  -9  -6   2   24.54    0.85
  -9  -6   2   23.79    0.87
   9   6  -2   25.76    1.10
   9   6  -2   22.96    1.21
   9   6  -2   25.89    1.11
   9   6  -2   24.21    1.10
   9   6  -2   23.52    1.22
  -9  -7   2    4.24    0.26
  -9  -7   2    3.48    0.65
  -9  -7   2    4.84    0.29
   9   7  -2    4.43    0.59
   9   7  -2    3.88    0.55
   9   7  -2    3.73    0.46
   9   7  -2    3.68    0.43
   9   7  -2    2.93    0.47
  -9  -8   2    2.66    0.23
  -9  -8   2    2.82    0.21
  -9  -8   2    2.08    0.54
   9   8  -2    2.59    0.38
   9   8  -2    2.36    0.55
   9   8  -2    2.25    0.50
   9   8  -2    2.44    0.60
   9   8  -2    3.19    0.43
  -9  -9   2    6.95    0.31
  -9  -9   2    7.54    0.82
   9   9  -2    7.41    0.73
  -9 -10   2    3.54    0.74
   9  10  -2    3.53    0.67
  -9 -11   2    0.47    0.42
   9  11  -2   -0.12    0.31
  -9 -12   2    3.36    0.86
   9  12  -2    3.47    0.85
 -10  12   2    4.88    0.92
  10 -12  -2    7.65    1.18
 -10  11   2    1.88    0.63
 -10  11   2    2.23    0.59
  10 -11  -2    0.92    0.56
 -10  10   2    0.28    0.41
 -10  10   2    0.08    0.34
  10 -10  -2   -0.54    0.30
 -10   9   2   -0.20    0.30
 -10   9   2   -0.16    0.27
  10  -9  -2    0.64    0.47
 -10   8   2    7.22    0.81
 -10   8   2    8.07    0.83
  10  -8  -2    6.68    0.92
  10  -8  -2    8.01    0.68
 -10   7   2   -0.03    0.27
 -10   7   2    0.00    0.21
 -10   7   2    0.25    0.27
  10  -7  -2    0.15    0.23
  10  -7  -2    0.40    0.34
 -10   6   2    1.71    0.39
 -10   6   2    1.08    0.37
 -10   6   2    1.52    0.41
  10  -6  -2    0.99    0.28
  10  -6  -2    1.06    0.38
 -10   5   2   32.97    1.19
 -10   5   2   32.17    1.44
 -10   5   2   35.37    1.60
 -10   5   2   31.40    1.39
  10  -5  -2   31.92    1.57
  10  -5  -2   34.76    1.43
 -10   4   2   41.91    1.70
 -10   4   2   44.76    1.73
 -10   4   2   47.64    1.88
 -10   4   2   42.23    1.54
  10  -4  -2   45.13    1.73
  10  -4  -2   42.55    1.84
 -10   3   2   19.69    1.02
 -10   3   2   19.48    0.90
 -10   3   2   22.31    1.13
 -10   3   2   22.05    1.06
  10  -3  -2   18.74    1.06
  10  -3  -2   19.75    0.94
  10  -3  -2   19.32    1.00
 -10   2   2   -0.24    0.14
 -10   2   2    0.06    0.09
 -10   2   2    0.04    0.15
 -10   2   2   -0.02    0.17
  10  -2  -2   -0.15    0.14
  10  -2  -2   -0.01    0.19
  10  -2  -2   -0.05    0.19
  10  -2  -2   -0.01    0.14
 -10   1   2    4.23    0.49
 -10   1   2    5.24    0.33
 -10   1   2    5.58    0.53
 -10   1   2    4.74    0.33
 -10   1   2    4.49    0.47
 -10   1   2    4.72    0.51
  10  -1  -2    5.23    0.47
  10  -1  -2    4.58    0.46
  10  -1  -2    4.38    0.47
  10  -1  -2    4.43    0.47
 -10   0   2    4.24    0.46
 -10   0   2    4.29    0.35
 -10   0   2    5.11    0.49
 -10   0   2    4.67    0.29
 -10   0   2    4.12    0.47
  10   0  -2    4.46    0.46
  10   0  -2    4.19    0.46
  10   0  -2    4.02    0.42
  10   0  -2    4.69    0.48
  10   0  -2    5.19    0.48
 -10  -1   2    4.31    0.30
 -10  -1   2    3.76    0.47
 -10  -1   2    4.92    0.45
 -10  -1   2    4.39    0.43
  10   1  -2    5.44    0.48
  10   1  -2    4.46    0.46
  10   1  -2    4.95    0.36
  10   1  -2    4.52    0.46
  10   1  -2    4.13    0.39
  10   1  -2    4.39    0.47
 -10  -2   2    0.18    0.12
 -10  -2   2   -0.13    0.11
 -10  -2   2    0.06    0.06
  10   2  -2    0.16    0.16
  10   2  -2    0.08    0.18
  10   2  -2   -0.02    0.10
  10   2  -2    0.12    0.10
  10   2  -2    0.02    0.17
  10   2  -2   -0.01    0.14
 -10  -3   2   20.34    0.84
 -10  -3   2   19.12    0.86
 -10  -3   2   19.15    0.85
  10   3  -2   19.64    0.99
  10   3  -2   19.93    0.78
  10   3  -2   19.76    1.00
  10   3  -2   18.68    0.95
  10   3  -2   19.39    0.77
 -10  -4   2   42.44    1.48
 -10  -4   2   46.08    1.59
 -10  -4   2   42.53    1.48
  10   4  -2   42.27    1.61
  10   4  -2   41.10    1.65
  10   4  -2   41.23    1.69
  10   4  -2   41.82    1.47
  10   4  -2   43.25    1.66
 -10  -5   2   31.43    1.15
 -10  -5   2   30.77    1.52
 -10  -5   2   32.12    1.14
 -10  -5   2   33.00    1.35
  10   5  -2   30.75    1.42
  10   5  -2   32.76    1.26
  10   5  -2   31.15    1.31
  10   5  -2   33.57    1.37
  10   5  -2   31.59    1.44
 -10  -6   2    1.07    0.23
 -10  -6   2    1.25    0.39
 -10  -6   2    1.26    0.25
  10   6  -2    1.45    0.37
  10   6  -2    0.71    0.26
  10   6  -2    1.34    0.34
  10   6  -2    1.20    0.33
  10   6  -2    0.95    0.25
 -10  -7   2    0.45    0.13
 -10  -7   2    0.19    0.12
 -10  -7   2   -0.10    0.26
  10   7  -2    0.31    0.26
  10   7  -2    0.04    0.17
  10   7  -2    0.36    0.30
  10   7  -2    0.51    0.13
  10   7  -2    0.07    0.20
  10   7  -2   -0.07    0.21
 -10  -8   2    7.74    0.84
 -10  -8   2    7.97    0.39
 -10  -8   2    8.39    0.38
  10   8  -2    8.73    0.74
  10   8  -2    6.56    0.83
  10   8  -2    7.93    0.62
 -10  -9   2   -0.11    0.31
  10   9  -2    0.09    0.28
  10   9  -2   -0.02    0.32
 -10 -10   2    0.20    0.34
  10  10  -2   -0.06    0.29
  10  10  -2   -0.50    0.37
 -10 -11   2    1.62    0.54
  10  11  -2    1.90    0.64
  10  11  -2    1.38    0.49
 -10 -12   2    6.00    0.94
  10  12  -2    6.99    1.03
  10  12  -2    6.42    0.88
 -11  12   2   13.87    1.27
  11 -12  -2   13.42    1.38
 -11  11   2    3.39    0.75
 -11  11   2    1.87    0.66
  11 -11  -2    2.29    0.67
 -11  10   2    3.20    0.83
 -11  10   2    2.76    0.61
  11 -10  -2    2.79    0.69
 -11   9   2    0.01    0.38
 -11   9   2    0.03    0.32
  11  -9  -2    0.42    0.46
 -11   8   2   17.29    1.18
 -11   8   2   18.09    1.25
  11  -8  -2   18.56    1.37
 -11   7   2    0.50    0.37
 -11   7   2    0.91    0.29
 -11   7   2    1.20    0.39
  11  -7  -2    0.90    0.42
 -11   6   2    0.48    0.25
 -11   6   2    0.54    0.29
 -11   6   2    0.93    0.39
 -11   6   2    0.50    0.14
  11  -6  -2    0.37    0.31
 -11   5   2    0.24    0.15
 -11   5   2    0.04    0.24
 -11   5   2   -0.13    0.19
 -11   5   2    0.48    0.32
  11  -5  -2    0.23    0.32
 -11   4   2   69.70    2.33
 -11   4   2   70.86    2.67
 -11   4   2   68.71    2.49
 -11   4   2   70.00    2.50
  11  -4  -2   69.30    2.64
 -11   3   2    2.62    0.54
 -11   3   2    2.76    0.45
 -11   3   2    2.64    0.40
 -11   3   2    2.33    0.23
 -11   3   2    2.36    0.43
  11  -3  -2    2.56    0.41
  11  -3  -2    1.98    0.42
  11  -3  -2    2.17    0.47
 -11   2   2    2.41    0.45
 -11   2   2    2.16    0.41
 -11   2   2    2.32    0.23
 -11   2   2    1.70    0.40
  11  -2  -2    1.54    0.36
  11  -2  -2    2.70    0.42
  11  -2  -2    2.11    0.41
 -11   1   2    1.10    0.21
 -11   1   2    0.61    0.25
 -11   1   2    0.51    0.24
 -11   1   2    0.76    0.21
 -11   1   2    0.32    0.19
  11  -1  -2    0.53    0.23
  11  -1  -2    0.60    0.23
  11  -1  -2    0.72    0.23
 -11   0   2   39.94    1.64
 -11   0   2   36.72    1.57
 -11   0   2   41.10    1.32
 -11   0   2   45.00    1.70
  11   0  -2   38.93    1.56
  11   0  -2   42.26    1.59
  11   0  -2   40.57    1.63
  11   0  -2   40.35    1.64
 -11  -1   2    0.38    0.21
 -11  -1   2    1.12    0.20
 -11  -1   2    0.56    0.23
 -11  -1   2    0.40    0.22
  11   1  -2    0.72    0.25
  11   1  -2    0.56    0.20
  11   1  -2    0.79    0.25
  11   1  -2    0.67    0.23
  11   1  -2    1.05    0.21
 -11  -2   2    2.55    0.36
 -11  -2   2    1.96    0.26
 -11  -2   2    2.37    0.17
  11   2  -2    2.35    0.38
  11   2  -2    1.88    0.22
  11   2  -2    2.02    0.29
  11   2  -2    1.88    0.37
  11   2  -2    1.88    0.38
 -11  -3   2    2.42    0.31
 -11  -3   2    2.43    0.37
 -11  -3   2    2.40    0.36
  11   3  -2    1.95    0.39
  11   3  -2    2.69    0.30
  11   3  -2    2.64    0.28
  11   3  -2    2.63    0.45
  11   3  -2    2.42    0.42
 -11  -4   2   69.36    2.26
 -11  -4   2   70.87    2.30
 -11  -4   2   65.00    2.24
  11   4  -2   74.87    2.48
  11   4  -2   67.00    2.46
  11   4  -2   70.25    2.37
  11   4  -2   65.26    2.39
  11   4  -2   67.35    2.18
 -11  -5   2    0.09    0.27
 -11  -5   2    0.11    0.15
 -11  -5   2    0.28    0.21
 -11  -5   2   -0.06    0.15
  11   5  -2    0.29    0.21
  11   5  -2    0.04    0.23
  11   5  -2   -0.04    0.21
  11   5  -2    0.08    0.16
  11   5  -2    0.39    0.24
 -11  -6   2    0.32    0.15
 -11  -6   2    0.44    0.17
 -11  -6   2    0.21    0.29
  11   6  -2    0.11    0.26
  11   6  -2    0.39    0.21
  11   6  -2    0.37    0.29
  11   6  -2    0.32    0.23
  11   6  -2    0.46    0.22
 -11  -7   2    1.44    0.24
 -11  -7   2    0.69    0.38
 -11  -7   2    1.15    0.26
  11   7  -2    1.63    0.44
  11   7  -2    1.20    0.28
  11   7  -2    1.05    0.39
  11   7  -2    0.56    0.30
  11   7  -2    1.10    0.30
 -11  -8   2   18.05    0.69
 -11  -8   2   17.51    1.29
 -11  -8   2   17.85    0.67
  11   8  -2   17.28    1.03
  11   8  -2   16.16    1.15
 -11  -9   2    0.37    0.34
  11   9  -2   -0.08    0.32
  11   9  -2    0.55    0.31
 -11 -10   2    4.05    0.76
  11  10  -2    2.02    0.58
  11  10  -2    3.89    0.66
 -11 -11   2    3.27    0.90
  11  11  -2    3.34    0.73
  11  11  -2    2.41    0.68
 -11 -12   2   13.66    1.35
  11  12  -2   13.51    1.20
  11  12  -2   13.58    1.32
 -12  11   2    2.22    0.60
  12 -11  -2    3.30    0.82
 -12  10   2    0.05    0.36
 -12  10   2    0.49    0.42
  12 -10  -2    0.07    0.40
 -12   9   2    5.02    0.79
 -12   9   2    3.40    0.81
  12  -9  -2    3.69    0.82
 -12   8   2    5.91    0.85
 -12   8   2    8.31    0.88
  12  -8  -2    8.09    1.05
 -12   7   2    3.82    0.71
 -12   7   2    4.83    0.67
 -12   7   2    5.42    0.65
  12  -7  -2    5.76    0.89
 -12   6   2    2.02    0.30
 -12   6   2    2.26    0.47
 -12   6   2    3.00    0.62
 -12   6   2    2.83    0.62
  12  -6  -2    1.12    0.41
 -12   5   2    4.97    0.62
 -12   5   2    6.10    0.66
 -12   5   2    5.34    0.46
 -12   5   2    5.87    0.74
  12  -5  -2    4.33    0.67
 -12   4   2    7.11    0.70
 -12   4   2    6.35    0.74
 -12   4   2    6.02    0.66
 -12   4   2    7.06    0.55
  12  -4  -2    6.94    0.75
 -12   3   2    9.93    0.87
 -12   3   2   10.71    0.78
 -12   3   2    9.64    0.76
 -12   3   2   10.20    0.47
 -12   3   2   10.85    0.69
  12  -3  -2   10.84    0.74
  12  -3  -2    9.83    0.82
 -12   2   2   -0.10    0.20
 -12   2   2    0.02    0.10
 -12   2   2    0.06    0.21
 -12   2   2   -0.22    0.21
  12  -2  -2   -0.01    0.21
  12  -2  -2    0.11    0.20
 -12   1   2   19.93    1.07
 -12   1   2   20.56    0.80
 -12   1   2   19.62    0.82
 -12   1   2   20.91    1.14
 -12   1   2   19.37    1.07
  12  -1  -2   19.50    1.05
  12  -1  -2   19.86    1.03
 -12   0   2   16.86    0.98
 -12   0   2   15.69    0.90
 -12   0   2   14.16    0.92
 -12   0   2   16.15    0.66
  12   0  -2   15.81    0.93
  12   0  -2   15.05    0.87
  12   0  -2   14.33    0.88
 -12  -1   2   18.99    0.99
 -12  -1   2   19.28    1.06
 -12  -1   2   19.61    0.77
 -12  -1   2   19.11    1.02
  12   1  -2   19.12    1.01
  12   1  -2   18.13    0.93
  12   1  -2   19.47    1.05
 -12  -2   2    0.23    0.20
 -12  -2   2    0.01    0.20
 -12  -2   2    0.01    0.08
 -12  -2   2   -0.15    0.12
  12   2  -2   -0.18    0.19
  12   2  -2   -0.10    0.20
  12   2  -2   -0.08    0.13
 -12  -3   2   10.27    0.67
 -12  -3   2   11.15    0.61
  12   3  -2   10.16    0.53
  12   3  -2   10.37    0.76
  12   3  -2   10.15    0.74
  12   3  -2   10.86    0.58
 -12  -4   2    6.99    0.54
 -12  -4   2    6.75    0.54
 -12  -4   2    5.74    0.73
 -12  -4   2    7.82    0.56
  12   4  -2    7.48    0.68
  12   4  -2    6.49    0.66
  12   4  -2    7.46    0.65
  12   4  -2    8.29    0.50
  12   4  -2    6.48    0.40
 -12  -5   2    5.81    0.55
 -12  -5   2    3.97    0.65
 -12  -5   2    5.52    0.46
 -12  -5   2    4.56    0.45
  12   5  -2    4.83    0.60
  12   5  -2    5.61    0.47
  12   5  -2    5.95    0.60
  12   5  -2    5.29    0.63
 -12  -6   2    1.83    0.32
 -12  -6   2    1.26    0.43
 -12  -6   2    2.01    0.33
  12   6  -2    1.09    0.35
  12   6  -2    1.48    0.44
  12   6  -2    1.92    0.39
  12   6  -2    1.77    0.46
 -12  -7   2    4.84    0.76
 -12  -7   2    4.85    0.41
 -12  -7   2    4.69    0.39
  12   7  -2    4.94    0.66
  12   7  -2    4.72    0.61
  12   7  -2    4.78    0.53
  12   7  -2    4.60    0.68
 -12  -8   2    7.93    0.46
 -12  -8   2    7.34    0.43
 -12  -8   2    6.91    0.91
  12   8  -2    8.78    0.89
  12   8  -2    8.46    0.73
 -12  -9   2    2.83    0.75
  12   9  -2    3.66    0.74
  12   9  -2    4.70    0.64
 -12 -10   2    0.05    0.40
  12  10  -2    0.01    0.29
  12  10  -2    0.29    0.39
 -12 -11   2    3.10    0.76
  12  11  -2    2.41    0.68
  12  11  -2    1.71    0.60
 -13  11   2    0.30    0.43
  13 -11  -2    0.17    0.50
 -13  10   2   11.93    1.12
  13 -10  -2    9.61    1.18
 -13   9   2    1.39    0.45
 -13   9   2    0.50    0.39
  13  -9  -2    1.20    0.54
 -13   8   2    1.17    0.41
 -13   8   2    1.45    0.54
  13  -8  -2    0.17    0.51
 -13   7   2    0.11    0.23
 -13   7   2    0.20    0.33
 -13   7   2   -0.12    0.39
  13  -7  -2   -0.01    0.42
 -13   6   2   23.48    1.40
 -13   6   2   24.34    1.31
 -13   6   2   22.11    0.96
 -13   6   2   20.96    1.22
  13  -6  -2   21.86    1.40
 -13   5   2   -0.09    0.19
 -13   5   2   -0.43    0.26
 -13   5   2    0.00    0.30
 -13   5   2   -0.06    0.25
  13  -5  -2   -0.06    0.29
 -13   4   2   33.17    1.10
 -13   4   2   32.38    1.38
 -13   4   2   31.75    1.63
 -13   4   2   35.96    1.58
 -13   4   2   31.34    1.54
  13  -4  -2   30.85    1.60
 -13   3   2    0.12    0.25
 -13   3   2    0.01    0.21
 -13   3   2    0.30    0.30
 -13   3   2    0.05    0.10
 -13   3   2    0.25    0.28
  13  -3  -2   -0.20    0.24
 -13   2   2   49.38    1.65
 -13   2   2   50.93    1.70
 -13   2   2   46.97    2.00
 -13   2   2   48.29    2.03
  13  -2  -2   51.00    1.93
  13  -2  -2   53.02    2.07
 -13   1   2    0.16    0.25
 -13   1   2    0.23    0.24
 -13   1   2    0.42    0.16
  13  -1  -2   -0.23    0.21
  13  -1  -2   -0.32    0.21
 -13   0   2    5.27    0.62
 -13   0   2    5.00    0.59
 -13   0   2    6.34    0.68
 -13   0   2    7.13    0.42
  13   0  -2    5.71    0.56
  13   0  -2    5.43    0.63
  13   0  -2    5.81    0.63
 -13  -1   2    0.44    0.15
 -13  -1   2    0.20    0.14
 -13  -1   2    0.16    0.26
 -13  -1   2    0.08    0.23
 -13  -1   2   -0.06    0.24
  13   1  -2   -0.21    0.20
  13   1  -2    0.18    0.21
  13   1  -2    0.27    0.28
 -13  -2   2   47.55    1.87
 -13  -2   2   50.59    1.92
 -13  -2   2   49.90    1.66
 -13  -2   2   49.21    1.40
  13   2  -2   49.96    1.93
  13   2  -2   48.12    1.96
  13   2  -2   48.09    1.78
 -13  -3   2    0.21    0.18
 -13  -3   2    0.39    0.23
  13   3  -2   -0.01    0.15
  13   3  -2    0.13    0.26
  13   3  -2    0.33    0.26
  13   3  -2   -0.01    0.13
 -13  -4   2   33.49    1.37
 -13  -4   2   32.98    1.35
 -13  -4   2   31.38    1.64
 -13  -4   2   34.54    1.34
  13   4  -2   33.00    1.48
  13   4  -2   30.00    1.50
  13   4  -2   32.63    1.50
  13   4  -2   33.06    1.22
 -13  -5   2    0.15    0.19
 -13  -5   2   -0.34    0.26
 -13  -5   2   -0.05    0.18
 -13  -5   2   -0.08    0.20
  13   5  -2    0.03    0.22
  13   5  -2    0.23    0.26
  13   5  -2    0.44    0.20
  13   5  -2   -0.04    0.28
 -13  -6   2   23.44    0.99
 -13  -6   2   21.90    0.99
 -13  -6   2   21.42    1.42
  13   6  -2   22.73    1.30
  13   6  -2   22.13    1.05
  13   6  -2   23.44    1.30
  13   6  -2   22.47    1.22
 -13  -7   2    0.09    0.36
 -13  -7   2    0.25    0.18
  13   7  -2    0.01    0.32
  13   7  -2    0.10    0.23
 -13  -8   2    0.70    0.47
 -13  -8   2    1.37    0.30
  13   8  -2    1.43    0.47
  13   8  -2    0.78    0.33
 -13  -9   2    0.14    0.48
  13   9  -2    0.59    0.42
  13   9  -2    0.93    0.35
 -13 -10   2   10.44    1.16
  13  10  -2    9.91    1.09
  13  10  -2    9.59    0.91
 -13 -11   2   -0.37    0.38
  13  11  -2    1.06    0.56
 -14  10   2    0.82    0.44
  14 -10  -2    0.23    0.46
 -14   9   2    6.93    0.93
 -14   9   2    6.27    0.94
  14  -9  -2    5.54    1.06
 -14   8   2    0.16    0.41
 -14   8   2    0.40    0.39
  14  -8  -2    0.30    0.45
 -14   7   2    8.14    0.84
 -14   7   2    7.01    1.02
 -14   7   2    6.66    0.75
  14  -7  -2    7.13    1.03
 -14   6   2    0.97    0.33
 -14   6   2    0.36    0.35
 -14   6   2    1.84    0.53
  14  -6  -2    1.37    0.47
 -14   5   2    7.74    0.81
 -14   5   2    7.11    0.61
 -14   5   2    8.25    0.84
 -14   5   2    5.67    0.78
  14  -5  -2    7.62    0.88
 -14   4   2    0.13    0.25
 -14   4   2    1.02    0.37
 -14   4   2    0.41    0.11
 -14   4   2    0.56    0.40
 -14   4   2    0.69    0.25
  14  -4  -2    0.77    0.39
 -14   3   2   35.31    1.19
 -14   3   2   34.80    1.53
 -14   3   2   35.63    1.65
 -14   3   2   31.93    1.64
 -14   3   2   38.93    1.76
  14  -3  -2   34.99    1.70
 -14   2   2    0.31    0.25
 -14   2   2    2.06    0.52
 -14   2   2    0.63    0.31
 -14   2   2    0.47    0.19
  14  -2  -2    0.58    0.32
 -14   1   2   20.27    0.86
 -14   1   2   20.11    1.19
 -14   1   2   21.54    1.19
  14  -1  -2   19.63    1.14
  14  -1  -2   20.60    1.13
 -14   0   2    1.55    0.28
 -14   0   2    1.05    0.36
 -14   0   2    0.70    0.36
 -14   0   2    0.54    0.31
  14   0  -2    1.44    0.40
  14   0  -2    1.23    0.41
  14   0  -2    0.81    0.33
 -14  -1   2   17.50    1.09
 -14  -1   2   21.09    1.17
 -14  -1   2   20.63    0.85
 -14  -1   2   20.77    0.78
  14   1  -2   21.17    1.18
  14   1  -2   19.75    1.13
  14   1  -2   19.15    1.04
 -14  -2   2    0.29    0.17
 -14  -2   2    0.28    0.25
 -14  -2   2    0.44    0.13
 -14  -2   2    0.52    0.29
  14   2  -2    0.47    0.31
  14   2  -2    0.29    0.29
  14   2  -2    0.60    0.24
 -14  -3   2   35.34    1.33
 -14  -3   2   35.71    1.50
  14   3  -2   33.14    1.55
  14   3  -2   32.64    1.58
 -14  -4   2    0.19    0.23
 -14  -4   2    0.26    0.22
 -14  -4   2    0.26    0.31
  14   4  -2    0.24    0.32
  14   4  -2    0.37    0.17
  14   4  -2    0.35    0.29
  14   4  -2    0.46    0.31
 -14  -5   2    7.07    0.85
 -14  -5   2    7.78    0.64
 -14  -5   2    8.05    0.62
  14   5  -2    8.15    0.55
  14   5  -2    7.24    0.76
  14   5  -2    6.85    0.77
  14   5  -2    7.69    0.74
 -14  -6   2    1.50    0.48
 -14  -6   2    1.89    0.38
  14   6  -2    1.20    0.28
  14   6  -2    1.25    0.37
  14   6  -2    1.19    0.43
 -14  -7   2    7.62    0.55
 -14  -7   2    7.08    1.01
  14   7  -2    5.94    0.85
  14   7  -2    5.81    0.61
 -14  -8   2   -0.05    0.17
 -14  -8   2    0.27    0.47
  14   8  -2   -0.24    0.23
  14   8  -2    0.35    0.36
 -14  -9   2    6.02    1.06
 -14  -9   2    5.34    0.36
  14   9  -2    4.47    0.85
 -14 -10   2    1.08    0.55
  14  10  -2    0.92    0.50
 -15  10   2    8.34    1.06
  15 -10  -2    7.67    1.15
 -15   9   2    1.09    0.52
 -15   9   2    1.19    0.52
  15  -9  -2    0.52    0.48
 -15   8   2    8.68    1.09
 -15   8   2   11.07    1.08
  15  -8  -2    9.93    1.17
 -15   7   2    3.99    0.71
 -15   7   2    3.56    0.89
  15  -7  -2    3.16    0.88
 -15   6   2   17.22    1.27
 -15   6   2   14.64    1.08
 -15   6   2   14.17    1.13
  15  -6  -2   16.12    1.24
 -15   5   2    2.42    0.45
 -15   5   2    1.55    0.41
 -15   5   2    3.36    0.69
 -15   5   2    1.59    0.46
  15  -5  -2    2.40    0.69
 -15   4   2    1.31    0.38
 -15   4   2    1.52    0.43
 -15   4   2    2.08    0.53
 -15   4   2    1.07    0.41
  15  -4  -2    1.42    0.42
 -15   3   2    0.17    0.23
 -15   3   2    0.26    0.34
 -15   3   2   -0.11    0.24
  15  -3  -2    0.00    0.24
 -15   2   2   23.28    1.35
 -15   2   2   26.36    1.41
 -15   2   2   23.68    1.28
 -15   2   2   25.88    1.05
  15  -2  -2   24.37    1.33
 -15   1   2    4.48    0.41
 -15   1   2    4.48    0.65
 -15   1   2    4.55    0.64
 -15   1   2    4.45    0.62
  15  -1  -2    5.02    0.60
 -15   0   2   27.00    1.06
 -15   0   2   27.58    1.47
 -15   0   2   30.43    1.50
  15   0  -2   28.02    1.37
  15   0  -2   26.29    1.40
  15   0  -2   27.70    1.46
 -15  -1   2    3.88    0.63
 -15  -1   2    4.71    0.41
 -15  -1   2    4.83    0.37
  15   1  -2    4.19    0.64
  15   1  -2    4.62    0.67
 -15  -2   2   24.55    0.82
 -15  -2   2   24.91    1.28
 -15  -2   2   25.48    1.04
  15   2  -2   24.91    1.33
  15   2  -2   26.54    1.38
 -15  -3   2    0.41    0.20
 -15  -3   2    0.43    0.33
 -15  -3   2    0.17    0.24
  15   3  -2    0.12    0.31
  15   3  -2    0.29    0.29
 -15  -4   2    1.43    0.43
 -15  -4   2    1.59    0.43
  15   4  -2    1.54    0.40
  15   4  -2    0.74    0.36
  15   4  -2    1.36    0.39
  15   4  -2    1.98    0.31
 -15  -5   2    2.27    0.43
 -15  -5   2    1.72    0.49
  15   5  -2    2.27    0.54
  15   5  -2    2.43    0.60
  15   5  -2    1.69    0.35
 -15  -6   2   15.63    1.27
 -15  -6   2   14.81    0.86
  15   6  -2   16.96    1.18
  15   6  -2   14.14    0.81
 -15  -7   2    4.30    0.85
 -15  -7   2    3.68    0.49
  15   7  -2    3.28    0.71
 -15  -8   2    9.42    0.63
 -15  -8   2    9.20    1.14
  15   8  -2   10.48    1.04
 -15  -9   2    1.56    0.60
 -15  -9   2    1.83    0.32
  15   9  -2    1.40    0.54
 -15 -10   2    7.37    1.11
  15  10  -2    7.25    1.04
 -16   9   2    1.64    0.58
 -16   9   2    1.80    0.77
  16  -9  -2    1.56    0.62
 -16   8   2   15.81    1.42
 -16   8   2   18.48    1.36
  16  -8  -2   16.69    1.45
 -16   7   2    2.61    0.66
 -16   7   2    2.57    0.69
  16  -7  -2    3.63    0.85
 -16   6   2    2.88    0.65
 -16   6   2    2.70    0.73
  16  -6  -2    1.72    0.54
 -16   5   2    2.20    0.57
 -16   5   2    1.82    0.46
 -16   5   2    1.07    0.41
 -16   5   2    2.91    0.61
  16  -5  -2    2.41    0.70
 -16   4   2    5.51    0.72
 -16   4   2    5.09    0.71
 -16   4   2    4.37    0.80
 -16   4   2    5.95    0.65
  16  -4  -2    5.33    0.73
 -16   3   2    3.50    0.58
 -16   3   2    2.91    0.44
 -16   3   2    2.71    0.60
 -16   3   2    3.67    0.67
  16  -3  -2    4.15    0.65
 -16   2   2    5.02    0.76
 -16   2   2    5.84    0.69
 -16   2   2    6.42    0.81
 -16   2   2    6.02    0.49
  16  -2  -2    5.90    0.69
 -16   1   2    3.14    0.69
 -16   1   2    2.94    0.68
 -16   1   2    1.75    0.48
 -16   1   2    3.10    0.37
  16  -1  -2    2.78    0.53
 -16   0   2   50.09    1.73
 -16   0   2   50.73    2.18
 -16   0   2   49.11    2.21
 -16  -1   2    2.32    0.63
 -16  -1   2    2.59    0.63
  16   1  -2    2.83    0.64
 -16  -2   2    6.68    0.71
 -16  -2   2    5.39    0.81
  16   2  -2    6.05    0.74
 -16  -3   2    1.67    0.48
 -16  -3   2    2.80    0.51
  16   3  -2    2.89    0.62
 -16  -4   2    5.08    0.61
 -16  -4   2    3.75    0.74
  16   4  -2    3.12    0.60
  16   4  -2    4.91    0.72
 -16  -5   2    2.31    0.67
 -16  -5   2    1.38    0.35
  16   5  -2    2.32    0.61
 -16  -6   2    1.72    0.52
 -16  -6   2    2.55    0.47
  16   6  -2    2.09    0.55
 -16  -7   2    1.59    0.62
 -16  -7   2    2.95    0.50
  16   7  -2    3.56    0.77
 -16  -8   2   15.64    0.86
 -16  -8   2   18.34    1.52
  16   8  -2   14.10    1.29
 -16  -9   2    1.00    0.59
 -16  -9   2    1.91    0.36
  16   9  -2    2.11    0.64
  17  -9  -2    0.38    0.59
 -17   8   2    0.31    0.46
 -17   8   2    0.39    0.50
  17  -8  -2   -0.02    0.51
 -17   7   2    3.91    0.92
 -17   7   2    2.53    0.61
  17  -7  -2    3.31    0.87
 -17   6   2   -0.15    0.32
 -17   6   2    0.88    0.49
  17  -6  -2    0.14    0.38
 -17   5   2    2.75    0.60
 -17   5   2    3.29    0.54
 -17   5   2    5.41    0.85
  17  -5  -2    3.24    0.78
 -17   4   2    0.60    0.30
 -17   4   2    0.43    0.40
 -17   4   2    1.12    0.40
  17  -4  -2    1.58    0.46
 -17   3   2    7.97    0.76
 -17   3   2    7.55    0.91
 -17   3   2    4.92    0.80
  17  -3  -2    6.64    0.80
 -17   2   2    1.03    0.40
 -17   2   2    2.93    0.60
 -17   2   2    2.43    0.64
 -17   1   2    6.93    0.81
 -17   1   2    6.77    0.84
 -17   0   2   -0.43    0.28
 -17   0   2   -0.23    0.27
 -17  -1   2    6.82    0.77
 -17  -1   2    6.54    0.88
  17   1  -2    8.04    0.86
 -17  -2   2    1.68    0.46
 -17  -2   2    2.49    0.62
  17   2  -2    3.70    0.67
 -17  -3   2    5.91    0.88
 -17  -3   2    6.92    0.73
  17   3  -2    7.43    0.83
 -17  -4   2    1.11    0.36
 -17  -4   2    0.87    0.42
  17   4  -2    1.28    0.46
 -17  -5   2    1.75    0.56
 -17  -5   2    3.06    0.57
  17   5  -2    2.67    0.66
 -17  -6   2    0.04    0.24
 -17  -6   2   -0.02    0.37
  17   6  -2    0.30    0.42
 -17  -7   2    2.59    0.66
 -17  -7   2    3.97    0.58
  17   7  -2    2.40    0.66
 -17  -8   2   -0.28    0.46
 -17  -8   2    0.37    0.27
  17   8  -2    0.23    0.46
 -17  -9   2    1.04    0.25
 -17  -9   2    0.20    0.57
  17   9  -2   -0.69    0.47
 -18   8   2   15.22    1.45
  18  -8  -2   13.45    1.39
 -18   7   2    0.00    0.46
 -18   7   2   -0.25    0.43
  18  -7  -2   -0.03    0.44
 -18   6   2    2.94    0.68
 -18   6   2    5.59    1.05
  18  -6  -2    3.33    0.81
 -18   5   2    0.02    0.40
  18  -5  -2   -0.01    0.41
 -18   4   2   23.74    1.64
 -18   4   2   22.75    1.31
 -18   3   2    0.32    0.39
 -18   3   2   -0.12    0.25
 -18   2   2    0.59    0.32
 -18   2   2    0.69    0.43
 -18   1   2    1.20    0.44
 -18   1   2    0.95    0.42
 -18   0   2   23.48    1.47
 -18   0   2   23.73    1.48
 -18  -1   2    0.78    0.43
 -18  -1   2    0.51    0.39
  18   1  -2    0.64    0.42
 -18  -2   2    0.47    0.36
 -18  -2   2    0.54    0.38
  18   2  -2    0.10    0.41
 -18  -3   2   -0.14    0.29
 -18  -3   2   -0.20    0.34
  18   3  -2   -0.29    0.36
 -18  -4   2   20.14    1.50
 -18  -4   2   23.22    1.30
  18   4  -2   22.06    1.43
 -18  -5   2   -0.09    0.35
 -18  -5   2   -0.18    0.27
  18   5  -2    0.09    0.39
 -18  -6   2    3.17    0.61
 -18  -6   2    1.60    0.57
  18   6  -2    3.45    0.79
 -18  -7   2    0.31    0.50
 -18  -7   2    0.27    0.29
  18   7  -2    0.37    0.46
 -18  -8   2   13.74    0.89
 -18  -8   2   10.84    1.45
  18   8  -2   15.09    1.33
 -19   7   2    1.76    0.61
 -19   6   2    7.60    1.07
 -19   5   2    0.22    0.48
 -19   4   2    6.27    0.97
 -19   4   2    4.57    0.74
 -19   3   2    0.30    0.33
 -19   3   2   -0.07    0.40
 -19   2   2    7.21    0.94
 -19   2   2    6.80    0.85
 -19   1   2    3.18    0.80
 -19   1   2    2.59    0.64
 -19   0   2    1.47    0.50
 -19   0   2    1.91    0.55
 -19  -1   2    1.66    0.50
 -19  -1   2    1.73    0.55
  19   1  -2    2.52    0.72
 -19  -2   2    7.93    1.06
 -19  -2   2    8.05    0.89
  19   2  -2    7.45    0.94
 -19  -3   2    0.38    0.35
 -19  -3   2    0.32    0.39
  19   3  -2    0.80    0.47
 -19  -4   2    4.78    0.91
 -19  -4   2    5.74    0.75
  19   4  -2    5.37    0.86
 -19  -5   2    0.12    0.39
 -19  -5   2   -0.04    0.30
  19   5  -2   -0.15    0.42
 -19  -6   2    5.73    0.74
 -19  -6   2    6.18    1.03
  19   6  -2    6.35    0.97
 -19  -7   2    0.25    0.54
 -19  -7   2    0.89    0.36
  19   7  -2    1.44    0.58
 -20   6   2    3.49    0.94
 -20   5   2    0.77    0.53
 -20   4   2    1.74    0.66
 -20   3   2    0.62    0.38
 -20   3   2   -0.44    0.39
 -20   2   2    4.34    0.79
 -20   2   2    2.99    0.73
 -20   1   2    6.89    0.92
 -20   1   2    3.96    0.79
 -20   0   2    8.85    1.05
 -20   0   2   10.48    1.09
 -20  -1   2    4.38    0.81
 -20  -1   2    4.53    0.82
 -20  -2   2    2.30    0.62
 -20  -2   2    3.44    0.74
  20   2  -2    2.26    0.64
 -20  -3   2    0.31    0.38
 -20  -3   2    0.87    0.53
  20   3  -2    0.27    0.44
 -20  -4   2    1.46    0.59
 -20  -4   2    2.89    0.71
  20   4  -2    2.61    0.72
 -20  -5   2    0.60    0.54
 -20  -5   2    0.10    0.33
  20   5  -2    0.51    0.50
 -20  -6   2    4.38    1.01
 -20  -6   2    3.85    0.68
  20   6  -2    3.14    0.87
 -21   4   2   26.63    1.91
 -21   3   2    1.73    0.52
 -21   3   2    1.37    0.58
 -21   2   2    5.18    0.99
 -21   2   2    4.98    0.80
 -21   1   2    0.78    0.43
 -21   1   2    1.76    0.57
 -21   0   2   -0.17    0.38
 -21   0   2    0.12    0.37
 -21  -1   2    1.52    0.57
 -21  -1   2    0.65    0.45
 -21  -2   2    9.23    1.16
 -21  -2   2    6.57    0.93
  21   2  -2    6.23    1.01
 -21  -3   2    0.93    0.52
 -21  -3   2    1.16    0.48
  21   3  -2    1.08    0.57
 -21  -4   2   24.62    1.79
 -21  -4   2   23.54    1.50
  21   4  -2   22.50    1.63
 -22   2   2   -0.14    0.37
 -22   2   2   -0.16    0.42
 -22   1   2   -0.15    0.40
 -22   1   2    0.68    0.43
 -22   0   2   -0.11    0.42
 -22   0   2    0.13    0.39
 -22  -1   2    0.07    0.42
 -22  -1   2    0.82    0.47
 -22  -2   2   -0.37    0.35
 -22  -2   2    0.17    0.40
  22   2  -2   -0.67    0.51
  22   2   3   -0.21    0.45
 -22  -2  -3    0.47    0.47
 -22  -1  -3    0.05    0.43
 -22   0  -3    5.81    1.03
 -22   1  -3   -0.02    0.47
 -22   2  -3   -0.18    0.44
  21   4   3    0.11    0.48
 -21  -4  -3   -0.12    0.42
  21   3   3   12.91    1.26
 -21  -3  -3   13.03    1.22
  21   2   3    1.04    0.54
 -21  -2  -3    0.98    0.48
  21   1   3   -0.49    0.41
 -21  -1  -3   -0.20    0.35
 -21   0  -3    0.48    0.43
 -21   1  -3    0.28    0.44
 -21   2  -3    1.05    0.59
 -21   3  -3   13.02    1.43
 -21   4  -3   -0.08    0.48
  20   6   3    2.51    0.73
 -20  -6  -3    1.40    0.51
  20   5   3    1.00    0.61
 -20  -5  -3    1.51    0.54
  20   4   3    0.18    0.44
 -20  -4  -3   -0.12    0.37
 -20  -4  -3   -0.15    0.36
  20   3   3    1.59    0.59
 -20  -3  -3    1.28    0.53
 -20  -3  -3    0.70    0.45
  20   2   3    4.89    0.88
 -20  -2  -3    4.51    0.84
 -20  -2  -3    3.74    0.81
  20   1   3   -0.54    0.36
 -20  -1  -3    0.54    0.43
 -20   0  -3    4.38    0.90
 -20   1  -3   -0.32    0.39
 -20   2  -3    3.95    0.98
 -20   3  -3    1.28    0.60
 -20   4  -3    0.16    0.53
 -20   5  -3    1.66    0.70
 -20   6  -3    1.11    0.60
  19   7   3    1.28    0.66
 -19  -7  -3    0.47    0.39
  19   6   3    0.28    0.51
 -19  -6  -3    0.97    0.45
  19   5   3    2.45    0.65
 -19  -5  -3    4.52    0.79
  19   4   3   -0.33    0.38
 -19  -4  -3   -0.07    0.34
 -19  -4  -3    0.17    0.35
  19   3   3    5.00    0.83
 -19  -3  -3    4.26    0.77
 -19  -3  -3    4.93    0.89
  19   2   3    1.90    0.55
 -19  -2  -3    1.43    0.46
 -19  -2  -3    2.73    0.72
  19   1   3   -0.04    0.41
 -19  -1  -3    0.21    0.40
 -19  -1  -3   -0.23    0.35
 -19   0  -3    1.34    0.48
 -19   0  -3    2.99    0.70
 -19   1  -3    0.35    0.39
 -19   1  -3    0.51    0.45
 -19   2  -3    1.64    0.58
 -19   2  -3    2.60    0.73
 -19   3  -3    4.52    0.89
 -19   3  -3    3.73    0.81
 -19   4  -3   -0.06    0.39
 -19   4  -3    0.12    0.42
  19  -5   3    2.91    0.81
 -19   5  -3    3.35    0.87
  19  -6   3    0.45    0.48
 -19   6  -3    0.76    0.60
  19  -7   3    0.43    0.49
 -19   7  -3    0.46    0.58
  18   8   3   -0.09    0.45
 -18  -8  -3   -0.03    0.31
  18   7   3   12.53    1.26
 -18  -7  -3   12.56    1.03
  18   6   3    1.43    0.59
 -18  -6  -3    1.29    0.45
  18   5   3   -0.54    0.34
 -18  -5  -3   -0.54    0.25
 -18  -5  -3   -0.18    0.28
  18   4   3    0.50    0.44
 -18  -4  -3    0.23    0.37
 -18  -4  -3    0.82    0.41
  18   3   3    0.03    0.42
 -18  -3  -3   -0.37    0.30
 -18  -3  -3   -0.23    0.29
  18   2   3   -0.40    0.38
 -18  -2  -3    0.44    0.37
 -18  -2  -3    0.44    0.37
  18   1   3   15.17    1.19
 -18  -1  -3   16.54    1.24
 -18  -1  -3   16.57    1.22
  18   0   3    1.77    0.57
 -18   0  -3    1.60    0.51
 -18   0  -3    1.27    0.46
 -18   1  -3   17.29    1.29
 -18   1  -3   14.53    1.18
 -18   2  -3    0.38    0.33
 -18   2  -3    0.48    0.45
  18  -3   3    0.03    0.33
 -18   3  -3    0.10    0.31
 -18   3  -3   -0.21    0.39
  18  -4   3    0.00    0.39
 -18   4  -3    0.50    0.37
 -18   4  -3    1.35    0.51
  18  -5   3   -0.21    0.34
 -18   5  -3    0.25    0.42
 -18   5  -3   -0.20    0.28
  18  -6   3    1.38    0.56
 -18   6  -3    0.92    0.44
 -18   6  -3    1.25    0.56
  18  -7   3   13.57    1.35
 -18   7  -3   13.60    1.41
 -18   7  -3   13.16    1.37
  18  -8   3   -0.24    0.44
 -18   8  -3    0.12    0.52
  17   9   3    0.34    0.47
 -17  -9  -3   -0.06    0.29
 -17  -9  -3    0.27    0.47
  17   8   3   21.34    1.54
 -17  -8  -3   21.97    1.30
  17   7   3    0.20    0.29
  17   7   3    0.25    0.47
 -17  -7  -3    0.33    0.36
  17   6   3    3.02    0.57
  17   6   3    0.94    0.50
 -17  -6  -3    1.51    0.43
  17   5   3   -0.68    0.36
  17   5   3    0.20    0.24
 -17  -5  -3    0.10    0.31
 -17  -5  -3    0.18    0.34
  17   4   3    6.73    0.86
  17   4   3    6.50    0.62
 -17  -4  -3    6.24    0.76
 -17  -4  -3    8.48    0.87
  17   3   3    0.02    0.38
 -17  -3  -3    0.63    0.38
 -17  -3  -3    0.31    0.32
  17   2   3    4.10    0.70
 -17  -2  -3    4.07    0.76
 -17  -2  -3    2.50    0.64
  17   1   3    2.95    0.66
 -17  -1  -3    1.36    0.42
 -17  -1  -3    0.78    0.39
  17   0   3   47.13    2.14
 -17   0  -3   46.34    2.14
 -17   0  -3   45.83    2.17
  17  -1   3    0.26    0.34
 -17   1  -3    0.80    0.36
 -17   1  -3    0.59    0.38
  17  -2   3    3.95    0.72
 -17   2  -3    4.11    0.70
 -17   2  -3    3.50    0.71
  17  -3   3    0.34    0.33
 -17   3  -3    0.63    0.38
 -17   3  -3    0.56    0.39
  17  -4   3    8.21    0.94
 -17   4  -3    8.31    1.04
 -17   4  -3    6.65    0.84
  17  -5   3    0.79    0.44
 -17   5  -3    0.57    0.36
 -17   5  -3    0.56    0.42
  17  -6   3    1.78    0.61
 -17   6  -3    1.29    0.47
 -17   6  -3    1.67    0.58
  17  -7   3   -0.21    0.40
 -17   7  -3    0.87    0.41
 -17   7  -3    1.13    0.60
  17  -8   3   21.82    1.66
 -17   8  -3   22.09    1.51
 -17   8  -3   21.75    1.68
  17  -9   3    0.39    0.57
 -17   9  -3    0.24    0.37
 -17   9  -3    0.09    0.40
  16   9   3    7.99    0.94
  16   9   3    7.36    1.05
 -16  -9  -3    8.89    0.82
  16   8   3    6.25    1.03
  16   8   3    4.12    0.68
 -16  -8  -3    5.28    0.72
  16   7   3   12.19    0.90
  16   7   3   11.51    1.19
 -16  -7  -3   12.41    0.94
  16   6   3    0.67    0.48
  16   6   3    2.90    0.51
 -16  -6  -3    2.78    0.61
  16   5   3   -0.09    0.35
  16   5   3   -0.18    0.20
 -16  -5  -3   -0.01    0.26
 -16  -5  -3   -0.03    0.25
  16   4   3    0.39    0.37
  16   4   3    0.59    0.26
  16   4   3    0.42    0.22
 -16  -4  -3    0.29    0.32
 -16  -4  -3    0.59    0.32
  16   3   3    0.17    0.32
  16   3   3    0.70    0.25
 -16  -3  -3    1.12    0.38
 -16  -3  -3    0.36    0.29
  16   2   3    0.21    0.33
 -16  -2  -3   -0.15    0.27
 -16  -2  -3    0.34    0.29
  16   1   3   23.07    1.37
 -16  -1  -3   22.62    1.35
 -16  -1  -3   21.71    1.30
 -16  -1  -3   21.35    0.96
  16   0   3   33.33    1.62
  16   0   3   34.60    1.71
 -16   0  -3   33.41    1.69
 -16   0  -3   32.96    1.31
 -16   0  -3   29.97    1.65
  16  -1   3   23.37    1.32
 -16   1  -3   22.96    1.37
 -16   1  -3   23.60    1.44
  16  -2   3   -0.15    0.29
 -16   2  -3    0.13    0.28
 -16   2  -3   -0.51    0.28
  16  -3   3    0.21    0.30
 -16   3  -3    0.00    0.27
 -16   3  -3    0.23    0.38
  16  -4   3    1.10    0.39
 -16   4  -3    1.50    0.47
 -16   4  -3    0.17    0.30
  16  -5   3   -0.28    0.30
 -16   5  -3   -0.27    0.26
 -16   5  -3    0.09    0.32
  16  -6   3    1.78    0.56
 -16   6  -3    2.81    0.64
 -16   6  -3    1.79    0.56
  16  -7   3    9.90    1.10
 -16   7  -3    9.74    0.97
 -16   7  -3   13.28    1.24
  16  -8   3    3.63    0.90
 -16   8  -3    4.38    0.77
 -16   8  -3    5.27    0.88
 -16   8  -3    4.97    0.95
  16  -9   3   12.10    1.32
 -16   9  -3    8.55    0.99
 -16   9  -3    9.99    1.01
  15  10   3    0.01    0.37
  15  10   3    0.34    0.47
 -15 -10  -3   -0.06    0.26
 -15 -10  -3   -0.24    0.47
  15   9   3    1.23    0.44
  15   9   3    0.87    0.53
 -15  -9  -3    1.23    0.39
  15   8   3   11.21    0.93
  15   8   3   10.45    1.19
 -15  -8  -3   13.13    0.94
  15   7   3    3.77    0.77
  15   7   3    4.92    0.63
 -15  -7  -3    5.81    0.69
  15   6   3    0.36    0.27
  15   6   3    0.08    0.23
  15   6   3    0.14    0.42
 -15  -6  -3    0.91    0.34
  15   5   3    3.65    0.51
  15   5   3    3.54    0.50
  15   5   3    3.49    0.66
 -15  -5  -3    3.84    0.59
 -15  -5  -3    4.13    0.66
  15   4   3    6.59    0.59
  15   4   3    5.74    0.74
  15   4   3    5.57    0.57
 -15  -4  -3    6.34    0.70
 -15  -4  -3    6.27    0.74
  15   3   3    4.83    0.53
  15   3   3    5.41    0.69
  15   3   3    5.15    0.51
 -15  -3  -3    4.90    0.64
 -15  -3  -3    5.72    0.72
  15   2   3    1.12    0.40
 -15  -2  -3    1.71    0.43
 -15  -2  -3    1.86    0.53
 -15  -2  -3    1.59    0.30
 -15  -2  -3    1.95    0.52
  15   1   3   12.62    0.88
  15   1   3   11.55    0.93
 -15  -1  -3   12.57    0.68
 -15  -1  -3   10.56    0.93
 -15  -1  -3   12.94    0.79
 -15  -1  -3   11.88    0.92
  15   0   3   32.76    1.60
  15   0   3   35.48    1.60
 -15   0  -3   30.94    1.61
 -15   0  -3   34.41    1.31
 -15   0  -3   31.20    1.61
 -15   0  -3   32.70    1.38
  15  -1   3   11.61    0.93
 -15   1  -3   13.18    0.78
 -15   1  -3   10.65    0.93
 -15   1  -3   12.27    0.98
 -15   1  -3   12.57    0.77
  15  -2   3    1.46    0.44
 -15   2  -3    0.89    0.34
 -15   2  -3    0.93    0.38
  15  -3   3    4.89    0.67
 -15   3  -3    4.38    0.66
 -15   3  -3    4.07    0.69
  15  -4   3    6.54    0.78
 -15   4  -3    5.22    0.78
 -15   4  -3    6.94    0.81
  15  -5   3    4.41    0.78
 -15   5  -3    4.37    0.76
 -15   5  -3    3.64    0.69
  15  -6   3    0.25    0.36
 -15   6  -3    0.12    0.38
 -15   6  -3    0.91    0.38
  15  -7   3    3.55    0.79
 -15   7  -3    4.73    0.79
 -15   7  -3    4.19    0.70
 -15   7  -3    4.03    0.84
  15  -8   3   12.29    1.21
 -15   8  -3   12.89    1.28
 -15   8  -3   11.20    1.00
 -15   8  -3    9.77    0.95
  15  -9   3    0.50    0.52
 -15   9  -3    2.70    0.69
 -15   9  -3    0.69    0.41
  15 -10   3    0.05    0.52
 -15  10  -3   -0.33    0.33
  14  10   3    7.65    0.85
  14  10   3    7.09    1.02
 -14 -10  -3    5.41    0.98
 -14 -10  -3    5.84    0.66
  14   9   3    1.35    0.55
  14   9   3    0.99    0.42
 -14  -9  -3    1.91    0.54
  14   8   3   37.89    1.73
  14   8   3   35.02    1.96
 -14  -8  -3   38.95    1.65
  14   7   3    0.03    0.25
  14   7   3    0.31    0.27
  14   7   3   -0.47    0.37
 -14  -7  -3    0.32    0.27
  14   6   3    2.70    0.49
  14   6   3    2.46    0.51
  14   6   3    1.93    0.54
 -14  -6  -3    1.44    0.37
 -14  -6  -3    2.33    0.49
  14   5   3    0.08    0.29
  14   5   3    0.11    0.20
  14   5   3   -0.18    0.19
 -14  -5  -3   -0.34    0.17
 -14  -5  -3    0.22    0.24
  14   4   3    8.95    0.82
  14   4   3    8.72    0.65
  14   4   3    7.89    0.63
 -14  -4  -3    7.38    0.77
 -14  -4  -3    8.60    0.76
  14   3   3    4.79    0.63
  14   3   3    4.25    0.48
  14   3   3    5.26    0.51
 -14  -3  -3    5.71    0.57
 -14  -3  -3    4.96    0.67
 -14  -3  -3    4.09    0.59
  14   2   3    4.79    0.54
  14   2   3    5.22    0.64
 -14  -2  -3    5.19    0.64
 -14  -2  -3    5.45    0.54
 -14  -2  -3    5.08    0.63
 -14  -2  -3    5.48    0.41
  14   1   3   -0.06    0.13
  14   1   3   -0.29    0.21
  14   1   3    0.08    0.32
 -14  -1  -3   -0.11    0.26
 -14  -1  -3   -0.25    0.15
 -14  -1  -3   -0.14    0.26
 -14  -1  -3    0.13    0.21
 -14  -1  -3    0.10    0.27
  14   0   3   88.15    3.15
  14   0   3   86.88    3.16
 -14   0  -3   90.97    3.25
 -14   0  -3   94.20    2.76
 -14   0  -3   90.55    3.26
 -14   0  -3   92.85    2.96
  14  -1   3    0.06    0.26
 -14   1  -3   -0.25    0.19
 -14   1  -3   -0.42    0.17
 -14   1  -3   -0.16    0.23
 -14   1  -3   -0.12    0.26
  14  -2   3    4.69    0.64
 -14   2  -3    4.84    0.64
 -14   2  -3    5.15    0.70
 -14   2  -3    4.97    0.55
  14  -3   3    4.34    0.64
 -14   3  -3    4.96    0.65
 -14   3  -3    4.64    0.71
  14  -4   3    6.72    0.79
 -14   4  -3    8.07    0.78
 -14   4  -3    8.25    0.92
  14  -5   3    0.18    0.31
 -14   5  -3   -0.08    0.35
 -14   5  -3   -0.13    0.22
  14  -6   3    2.48    0.64
 -14   6  -3    1.56    0.40
 -14   6  -3    2.54    0.56
 -14   6  -3    3.47    0.77
  14  -7   3   -0.09    0.34
 -14   7  -3   -0.07    0.35
 -14   7  -3    0.11    0.30
 -14   7  -3   -0.15    0.27
  14  -8   3   39.61    2.09
 -14   8  -3   37.98    1.86
 -14   8  -3   38.61    1.80
 -14   8  -3   38.85    2.11
  14  -9   3    0.77    0.54
 -14   9  -3    0.95    0.41
 -14   9  -3    1.12    0.39
  14 -10   3    5.73    1.11
 -14  10  -3    6.23    0.84
  13  11   3   19.24    1.42
  13  11   3   18.55    1.53
 -13 -11  -3   20.25    1.54
 -13 -11  -3   20.64    1.09
  13  10   3    1.60    0.48
  13  10   3    1.62    0.59
 -13 -10  -3    2.33    0.51
 -13 -10  -3    1.96    0.62
  13   9   3    0.31    0.34
  13   9   3    0.54    0.47
 -13  -9  -3    0.26    0.27
  13   8   3    1.82    0.50
  13   8   3    1.46    0.43
  13   8   3    1.03    0.48
 -13  -8  -3    1.23    0.34
  13   7   3    0.71    0.31
  13   7   3    0.46    0.40
  13   7   3    0.46    0.29
 -13  -7  -3    0.67    0.29
  13   6   3    0.34    0.26
  13   6   3   -0.11    0.12
  13   6   3    0.27    0.34
  13   6   3    0.02    0.22
 -13  -6  -3   -0.06    0.22
 -13  -6  -3   -0.17    0.20
  13   5   3   31.77    1.36
  13   5   3   31.61    1.38
  13   5   3   30.52    1.53
 -13  -5  -3   31.43    1.48
 -13  -5  -3   31.46    1.43
  13   4   3    4.08    0.60
  13   4   3    3.90    0.48
  13   4   3    3.45    0.46
 -13  -4  -3    3.59    0.51
 -13  -4  -3    3.09    0.52
 -13  -4  -3    3.58    0.48
 -13  -4  -3    3.17    0.54
  13   3   3   55.38    1.97
  13   3   3   56.04    2.03
  13   3   3   53.70    2.16
  13   3   3   55.14    1.92
 -13  -3  -3   58.11    2.07
 -13  -3  -3   57.04    2.10
 -13  -3  -3   54.97    2.13
 -13  -3  -3   53.24    2.14
  13   2   3    1.23    0.34
  13   2   3    0.21    0.27
  13   2   3    0.93    0.28
 -13  -2  -3    1.36    0.36
 -13  -2  -3    0.46    0.26
 -13  -2  -3    0.73    0.29
 -13  -2  -3    0.89    0.32
 -13  -2  -3    1.07    0.25
  13   1   3    2.28    0.44
  13   1   3    1.62    0.46
 -13  -1  -3    1.74    0.35
 -13  -1  -3    2.21    0.31
 -13  -1  -3    1.90    0.44
 -13  -1  -3    1.49    0.38
 -13  -1  -3    2.36    0.50
  13   0   3    3.13    0.47
  13   0   3    1.55    0.22
  13   0   3    2.33    0.49
 -13   0  -3    3.21    0.57
 -13   0  -3    1.26    0.35
 -13   0  -3    2.17    0.37
 -13   0  -3    1.82    0.34
  13  -1   3    1.22    0.40
  13  -1   3    2.29    0.46
 -13   1  -3    2.49    0.52
 -13   1  -3    1.64    0.37
 -13   1  -3    2.18    0.39
 -13   1  -3    2.31    0.51
  13  -2   3    0.31    0.27
 -13   2  -3    0.74    0.30
 -13   2  -3    0.92    0.35
 -13   2  -3    0.47    0.23
  13  -3   3   56.81    2.27
 -13   3  -3   54.44    2.21
 -13   3  -3   56.50    2.32
  13  -4   3    3.44    0.61
 -13   4  -3    4.10    0.66
 -13   4  -3    4.20    0.61
  13  -5   3   33.81    1.64
 -13   5  -3   27.66    1.46
 -13   5  -3   30.03    1.43
 -13   5  -3   30.94    1.63
  13  -6   3    0.04    0.31
 -13   6  -3    0.04    0.25
 -13   6  -3    0.11    0.26
 -13   6  -3   -0.22    0.27
  13  -7   3    0.81    0.46
 -13   7  -3    0.09    0.38
 -13   7  -3    0.04    0.26
 -13   7  -3    0.24    0.29
  13  -8   3    1.28    0.48
 -13   8  -3    2.23    0.61
 -13   8  -3    0.45    0.36
 -13   8  -3    1.58    0.54
  13  -9   3    0.65    0.48
 -13   9  -3   -0.09    0.24
 -13   9  -3   -0.09    0.31
  13 -10   3    1.84    0.62
 -13  10  -3    0.72    0.43
  13 -11   3   18.88    1.60
  12  11   3    0.07    0.34
  12  11   3    0.03    0.48
 -12 -11  -3   -0.21    0.37
 -12 -11  -3    0.36    0.30
  12  10   3    0.16    0.43
  12  10   3    0.40    0.38
 -12 -10  -3    0.22    0.38
 -12 -10  -3   -0.26    0.20
  12   9   3    5.69    0.94
  12   9   3    5.05    0.68
 -12  -9  -3    4.60    0.59
  12   8   3   19.27    1.13
  12   8   3   17.03    1.24
 -12  -8  -3   18.36    1.00
  12   7   3    2.20    0.61
  12   7   3    1.41    0.37
  12   7   3    2.55    0.31
  12   7   3    2.96    0.54
  12   7   3    1.14    0.31
 -12  -7  -3    3.45    0.50
  12   6   3    0.98    0.38
  12   6   3    1.61    0.26
  12   6   3    1.48    0.40
  12   6   3    0.97    0.32
  12   6   3    1.72    0.44
 -12  -6  -3    1.73    0.44
 -12  -6  -3    0.92    0.29
  12   5   3    0.18    0.20
  12   5   3    0.11    0.19
  12   5   3    0.17    0.14
  12   5   3    0.37    0.31
 -12  -5  -3   -0.31    0.18
 -12  -5  -3   -0.19    0.18
  12   4   3    4.48    0.59
  12   4   3    4.25    0.43
  12   4   3    4.39    0.46
  12   4   3    4.96    0.49
 -12  -4  -3    4.36    0.55
 -12  -4  -3    5.10    0.52
 -12  -4  -3    4.70    0.55
  12   3   3    0.62    0.31
  12   3   3    1.24    0.33
  12   3   3    1.49    0.32
  12   3   3    1.18    0.32
 -12  -3  -3    0.68    0.26
 -12  -3  -3    0.94    0.27
 -12  -3  -3    0.89    0.28
 -12  -3  -3    0.44    0.22
  12   2   3    0.30    0.19
  12   2   3    0.44    0.28
  12   2   3    0.53    0.20
 -12  -2  -3    0.57    0.17
 -12  -2  -3    0.27    0.23
 -12  -2  -3    0.39    0.21
 -12  -2  -3    0.39    0.22
 -12  -2  -3    0.34    0.21
  12   1   3    8.81    0.66
  12   1   3    9.61    0.72
 -12  -1  -3    9.81    0.54
 -12  -1  -3    9.62    0.74
 -12  -1  -3    9.82    0.62
 -12  -1  -3    9.55    0.71
 -12  -1  -3    7.43    0.73
  12   0   3   38.70    1.60
  12   0   3   36.97    1.60
  12   0   3   40.26    1.30
 -12   0  -3   41.05    1.39
 -12   0  -3   38.66    1.46
 -12   0  -3   38.71    1.67
 -12   0  -3   36.94    1.64
 -12   0  -3   39.78    1.68
  12  -1   3    8.91    0.73
  12  -1   3    9.83    0.73
 -12   1  -3    9.71    0.63
 -12   1  -3    9.90    0.63
 -12   1  -3   10.11    0.77
 -12   1  -3    8.91    0.73
  12  -2   3    0.54    0.29
 -12   2  -3    0.47    0.23
 -12   2  -3    0.34    0.23
 -12   2  -3    0.84    0.31
  12  -3   3    1.09    0.33
 -12   3  -3    0.32    0.32
 -12   3  -3    0.21    0.23
  12  -4   3    4.13    0.61
 -12   4  -3    5.72    0.69
 -12   4  -3    3.58    0.56
  12  -5   3    0.28    0.28
 -12   5  -3   -0.29    0.18
 -12   5  -3    0.39    0.31
 -12   5  -3    0.18    0.22
  12  -6   3    2.38    0.59
 -12   6  -3    2.19    0.48
 -12   6  -3    0.69    0.30
 -12   6  -3    0.94    0.39
  12  -7   3    1.87    0.51
 -12   7  -3    2.96    0.56
 -12   7  -3    1.78    0.54
 -12   7  -3    0.75    0.30
  12  -8   3   19.75    1.36
 -12   8  -3   18.62    1.14
 -12   8  -3   19.01    1.37
 -12   8  -3   19.51    1.17
  12  -9   3    6.19    0.94
 -12   9  -3    4.33    0.71
 -12   9  -3    5.97    0.71
  12 -10   3    0.27    0.42
 -12  10  -3    0.08    0.35
  12 -11   3    0.71    0.56
 -12  11  -3   -0.01    0.38
 -11 -12  -3    0.78    0.32
 -11 -12  -3    0.00    0.38
  11  11   3   19.63    1.49
  11  11   3   17.37    1.28
 -11 -11  -3   17.69    1.39
 -11 -11  -3   17.08    1.00
  11  10   3    1.15    0.54
  11  10   3    0.60    0.38
 -11 -10  -3    0.33    0.25
  11   9   3   -0.42    0.33
  11   9   3   -0.32    0.24
 -11  -9  -3   -0.13    0.22
  11   8   3    6.80    0.47
  11   8   3    6.73    0.83
  11   8   3    6.78    0.69
 -11  -8  -3    7.46    0.64
  11   7   3    4.21    0.67
  11   7   3    6.17    0.61
  11   7   3    3.25    0.54
  11   7   3    3.87    0.48
  11   7   3    3.97    0.37
 -11  -7  -3    3.94    0.51
  11   6   3    5.17    0.37
  11   6   3    4.56    0.54
  11   6   3    4.21    0.62
  11   6   3    5.41    0.54
  11   6   3    4.63    0.55
 -11  -6  -3    4.73    0.46
 -11  -6  -3    4.63    0.53
 -11  -6  -3    5.20    0.53
  11   5   3   41.53    1.50
  11   5   3   43.31    1.66
  11   5   3   42.92    1.33
  11   5   3   42.01    1.69
  11   5   3   41.71    1.80
  11   5   3   43.94    1.65
 -11  -5  -3   43.18    1.61
 -11  -5  -3   42.39    1.76
 -11  -5  -3   42.92    1.66
 -11  -5  -3   40.48    1.67
  11   4   3    0.61    0.25
  11   4   3    1.14    0.24
  11   4   3    0.48    0.19
  11   4   3    1.40    0.32
  11   4   3    0.82    0.24
  11   4   3    0.67    0.31
 -11  -4  -3    0.58    0.25
 -11  -4  -3    0.36    0.23
 -11  -4  -3    0.91    0.29
  11   3   3   89.87    2.98
  11   3   3   89.41    3.10
  11   3   3   92.35    2.86
  11   3   3   93.68    2.95
  11   3   3   99.64    3.15
 -11  -3  -3   96.04    3.06
 -11  -3  -3   95.14    3.04
 -11  -3  -3   93.59    3.11
 -11  -3  -3   90.10    3.08
  11   2   3   -0.05    0.15
  11   2   3   -0.07    0.11
  11   2   3   -0.16    0.12
  11   2   3    0.01    0.13
  11   2   3    0.11    0.14
  11   2   3   -0.22    0.16
 -11  -2  -3    0.07    0.17
 -11  -2  -3    0.09    0.16
 -11  -2  -3    0.19    0.18
 -11  -2  -3   -0.05    0.10
 -11  -2  -3   -0.16    0.15
  11   1   3    6.96    0.56
  11   1   3    7.99    0.45
  11   1   3    6.88    0.58
  11   1   3    6.04    0.57
 -11  -1  -3    6.30    0.56
 -11  -1  -3    6.25    0.59
 -11  -1  -3    6.72    0.57
 -11  -1  -3    6.76    0.42
 -11  -1  -3    6.78    0.50
  11   0   3   16.94    0.93
  11   0   3   19.30    0.70
  11   0   3   17.74    0.98
  11   0   3   17.32    0.94
 -11   0  -3   17.38    0.97
 -11   0  -3   17.60    0.99
 -11   0  -3   19.17    0.80
 -11   0  -3   19.91    0.87
 -11   0  -3   16.32    0.95
  11  -1   3    6.73    0.60
  11  -1   3    6.25    0.57
  11  -1   3    6.68    0.60
 -11   1  -3    6.96    0.64
 -11   1  -3    6.89    0.61
 -11   1  -3    7.09    0.50
  11  -2   3    0.08    0.19
 -11   2  -3   -0.30    0.16
 -11   2  -3   -0.01    0.16
 -11   2  -3   -0.17    0.18
  11  -3   3   94.20    3.26
 -11   3  -3   94.38    3.30
 -11   3  -3   94.25    3.19
  11  -4   3    0.73    0.32
 -11   4  -3    0.14    0.24
 -11   4  -3    1.28    0.32
 -11   4  -3    0.50    0.31
  11  -5   3   43.48    1.90
 -11   5  -3   42.12    1.76
 -11   5  -3   44.19    1.92
 -11   5  -3   41.54    1.67
  11  -6   3    5.15    0.68
 -11   6  -3    3.92    0.54
 -11   6  -3    5.32    0.27
 -11   6  -3    4.84    0.67
 -11   6  -3    5.57    0.59
  11  -7   3    4.10    0.75
 -11   7  -3    4.62    0.75
 -11   7  -3    3.51    0.57
 -11   7  -3    4.94    0.60
  11  -8   3    8.23    0.89
 -11   8  -3    8.02    0.90
 -11   8  -3    5.97    0.71
 -11   8  -3    5.41    0.66
  11  -9   3    0.01    0.37
 -11   9  -3    0.08    0.23
 -11   9  -3   -0.47    0.27
  11 -10   3    0.88    0.46
 -11  10  -3    0.19    0.36
  11 -11   3   19.77    1.48
 -11  11  -3   18.87    1.28
  11 -12   3    0.32    0.46
 -10 -12  -3    1.66    0.56
 -10 -12  -3    2.64    0.56
  10  11   3    0.31    0.41
 -10 -11  -3    0.46    0.29
 -10 -11  -3    0.45    0.38
  10  10   3    5.25    0.78
 -10 -10  -3    4.59    0.57
  10   9   3   13.57    1.04
 -10  -9  -3   13.31    0.83
  10   8   3    1.03    0.35
 -10  -8  -3    1.50    0.41
  10   7   3    6.39    0.43
  10   7   3    5.94    0.72
  10   7   3    6.94    0.56
  10   7   3    6.59    0.66
  10   7   3    7.51    0.70
 -10  -7  -3    6.99    0.52
 -10  -7  -3    6.93    0.58
  10   6   3    6.08    0.68
  10   6   3    5.09    0.50
  10   6   3    4.88    0.54
  10   6   3    5.45    0.58
  10   6   3    5.77    0.38
  10   6   3    5.30    0.37
 -10  -6  -3    5.44    0.51
 -10  -6  -3    5.03    0.52
 -10  -6  -3    5.07    0.46
  10   5   3    0.72    0.29
  10   5   3    0.59    0.22
  10   5   3    0.81    0.27
  10   5   3    0.66    0.25
  10   5   3    0.68    0.16
  10   5   3    0.87    0.23
 -10  -5  -3    0.79    0.24
 -10  -5  -3    0.56    0.24
 -10  -5  -3    0.58    0.25
 -10  -5  -3    0.73    0.22
  10   4   3   57.61    2.01
  10   4   3   53.16    2.05
  10   4   3   54.07    1.87
  10   4   3   52.62    1.84
  10   4   3   53.81    1.91
  10   4   3   54.77    1.62
 -10  -4  -3   53.94    1.97
 -10  -4  -3   57.76    2.03
 -10  -4  -3   53.20    1.95
  10   3   3   30.77    1.17
  10   3   3   30.88    1.34
  10   3   3   30.99    1.21
  10   3   3   32.25    1.33
  10   3   3   31.37    1.22
 -10  -3  -3   31.33    1.28
 -10  -3  -3   29.47    1.29
 -10  -3  -3   29.13    1.27
 -10  -3  -3   32.03    1.26
  10   2   3   23.51    1.01
  10   2   3   23.06    1.08
  10   2   3   23.80    1.09
  10   2   3   22.40    0.95
  10   2   3   23.74    0.91
 -10  -2  -3   24.44    1.05
 -10  -2  -3   22.63    0.82
 -10  -2  -3   22.43    1.07
 -10  -2  -3   22.70    0.99
 -10  -2  -3   21.20    1.04
  10   1   3    3.15    0.30
  10   1   3    2.64    0.38
  10   1   3    2.95    0.40
  10   1   3    2.51    0.37
 -10  -1  -3    3.28    0.42
 -10  -1  -3    3.15    0.45
 -10  -1  -3    3.35    0.43
 -10  -1  -3    3.53    0.30
 -10  -1  -3    3.63    0.36
  10   0   3    0.18    0.08
  10   0   3    0.26    0.17
  10   0   3   -0.14    0.17
  10   0   3    0.06    0.15
  10   0   3   -0.21    0.13
 -10   0  -3   -0.10    0.17
 -10   0  -3   -0.03    0.18
 -10   0  -3   -0.07    0.17
 -10   0  -3    0.16    0.12
 -10   0  -3   -0.01    0.13
  10  -1   3    3.10    0.40
  10  -1   3    2.98    0.40
  10  -1   3    2.86    0.42
  10  -1   3    2.66    0.43
 -10   1  -3    3.13    0.45
 -10   1  -3    2.75    0.41
 -10   1  -3    3.09    0.35
  10  -2   3   23.39    1.12
  10  -2   3   22.20    1.10
  10  -2   3   23.48    1.05
 -10   2  -3   21.17    1.06
 -10   2  -3   21.96    1.12
  10  -3   3   32.73    1.40
  10  -3   3   31.60    1.34
  10  -3   3   30.42    1.41
 -10   3  -3   31.36    1.36
 -10   3  -3   28.98    1.40
  10  -4   3   54.08    2.07
  10  -4   3   57.31    2.06
  10  -4   3   54.87    2.15
 -10   4  -3   54.89    1.96
 -10   4  -3   53.00    2.15
 -10   4  -3   54.06    2.05
  10  -5   3    0.55    0.25
  10  -5   3    0.56    0.29
 -10   5  -3    0.37    0.25
 -10   5  -3    0.61    0.30
 -10   5  -3    1.00    0.29
  10  -6   3    5.83    0.68
 -10   6  -3    6.18    0.35
 -10   6  -3    4.74    0.57
 -10   6  -3    5.23    0.65
 -10   6  -3    5.11    0.56
  10  -7   3    7.77    0.86
 -10   7  -3    6.12    0.62
 -10   7  -3    5.78    0.62
 -10   7  -3    6.75    0.74
  10  -8   3    2.21    0.61
 -10   8  -3    1.03    0.38
 -10   8  -3    1.91    0.50
 -10   8  -3    0.72    0.28
  10  -9   3   13.71    1.07
  10  -9   3   12.79    1.09
 -10   9  -3   12.79    0.96
 -10   9  -3   14.57    0.93
  10 -10   3    6.47    0.95
 -10  10  -3    7.22    0.81
  10 -11   3    0.21    0.43
 -10  11  -3    0.49    0.35
  10 -12   3    2.49    0.69
  -9 -12  -3    3.15    0.59
  -9 -12  -3    3.21    0.80
   9  11   3    1.11    0.51
  -9 -11  -3    2.78    0.74
  -9 -11  -3    2.26    0.52
   9  10   3    1.35    0.43
  -9 -10  -3    1.35    0.34
  -9 -10  -3    1.47    0.46
   9   9   3    0.80    0.33
  -9  -9  -3    0.29    0.31
  -9  -9  -3    0.81    0.27
   9   8   3    4.85    0.61
   9   8   3    4.79    0.45
  -9  -8  -3    4.49    0.51
  -9  -8  -3    4.79    0.49
  -9  -8  -3    4.87    0.62
   9   7   3    1.32    0.32
   9   7   3    1.01    0.32
  -9  -7  -3    2.09    0.34
  -9  -7  -3    1.39    0.37
   9   6   3    1.08    0.31
   9   6   3    0.93    0.24
   9   6   3    0.74    0.25
   9   6   3    1.40    0.37
   9   6   3    1.23    0.37
   9   6   3    1.24    0.22
  -9  -6  -3    0.68    0.20
  -9  -6  -3    1.48    0.36
  -9  -6  -3    0.93    0.23
   9   5   3    0.84    0.22
   9   5   3    0.58    0.29
   9   5   3    0.94    0.27
   9   5   3    0.48    0.18
   9   5   3    0.71    0.24
   9   5   3    0.96    0.22
  -9  -5  -3    0.47    0.18
  -9  -5  -3    0.99    0.29
  -9  -5  -3    0.42    0.20
[truncated: 1,671,303 more chars]
